# Supplementary material
Source: publisher figshare collection journal article supplement (https://acs.figshare.com/ndownloader/files/17466146)

Supplementary Materials  
for

# **Hydrogen Atom Transfer Induced Boron Retaining Coupling of Organoboronic Esters and Organolithium Reagents**

Dinghai Wang, Christian Mück-Lichtenfeld, Armido Studer\*

Corresponding author. e-mail: studer@uni-muenster.de

## **Table of Contents**

|                                                                                               |     |
|-----------------------------------------------------------------------------------------------|-----|
| 1. General Information.....                                                                   | S2  |
| 2. General Procedures for Coupling of Organoboronic Esters and Organolithium<br>Reagents..... | S3  |
| 3. Reaction Screening .....                                                                   | S6  |
| 4. Preparation of Boronic Esters and Alkylolithium Reagents .....                             | S7  |
| 5. Mechanistic Studies .....                                                                  | S25 |
| 6. Product Characterization.....                                                              | S29 |
| 7. DFT Calculations .....                                                                     | S62 |
| 8. References .....                                                                           | S88 |
| 9. NMR Spectra of New Compounds .....                                                         | S90 |

## 1. General Information

All reactions involving air or moisture sensitive reagents were carried out in flame-dried glassware under argon atmosphere using standard *Schlenk* techniques. Solvents used in reactions were either freshly distilled or obtained in extra-dry grade from commercial sources. Diethyl ether (Et<sub>2</sub>O) was refluxed over K and freshly distilled from K-Na-alloy (4:1) afterwards. Tetrahydrofuran (THF) was refluxed over Na and distilled from K afterwards. Acetonitrile (MeCN, 99.9%, Extra Dry over Molecular Sieves) was purchased from *Acros Organics*. Dimethyl sulfoxide (DMSO, 99.9%, Extra Dry over Molecular Sieves) was purchased from *Acros Organics*. Solvents for extraction and for flash chromatography were distilled. Otherwise noticed, commercially available arylboronic acid pinacol esters were purchased from *ABCR*, *Acros Organics*, *Alfa Aesar*, *Fluka*, *Sigma Aldrich* and *TCI* and were used as received. *n*-Butyllithium was purchased from *Acros Organics*. *s*-Butyllithium, isopropyllithium, phenyllithium and lithium were purchased from *Sigma Aldrich*. Trifluoromethyl iodide was purchased from *ABCR* and dissolved in DMSO. All other chemicals were purchased from *ABCR*, *Acros Organics*, *Alfa Aesar*, *Fluka*, *Sigma Aldrich* and *TCI* and were used as received. Flash chromatography (**FC**) was performed on *Merck* silica gel 60 (40-63  $\mu$ m). *Merck* silica gel 60 F254 plates were used for thin layer chromatography (**TLC**) using UV light (254/366 nm) or oxidation with KMnO<sub>4</sub> (1.5 g in 200 mL H<sub>2</sub>O, 5 g NaHCO<sub>3</sub>) for detection. Melting points (**MP**) were determined with a *Stuart SMP10* and are uncorrected. Infrared spectra (**IR**) were measured on a *Digilab 3100 FT-IR Excalibur Series* spectrometer and the position of the absorption bands is given in wave numbers  $\nu$  (cm<sup>-1</sup>). **<sup>1</sup>H NMR** (300 MHz, 400 MHz and 600 MHz), **<sup>13</sup>C NMR** (75 MHz, 100 MHz and 151 MHz), **<sup>19</sup>F NMR** (282 MHz and 564 MHz) and **<sup>11</sup>B NMR** (96 MHz, 128 MHz and 192 MHz) spectra were measured on a *Bruker DPX 300*, *Bruker AV 300* or an *Agilent DD2 600* spectrometer. The multiplicity of all signals were described as s (singlet), d (doublet), t (triplet), q (quartet) and m (multiplet). Chemical shifts ( $\delta$  in ppm) were referenced on the residual peak of CDCl<sub>3</sub> (<sup>1</sup>HNMR:  $\delta$  = 7.26; <sup>13</sup>C NMR:  $\delta$  = 77.0) or on an external standard (CFCl<sub>3</sub>: <sup>19</sup>F NMR:  $\delta$  = 0.0). **HRMS ESI** (m/z) measurements were performed on a *Bruker MicroTof* and **HRMS EI** (m/z) on a *Waters-Micromass QuattroMicro GC-MS*. **Chiral HPLC** analysis was performed on a *Hewlett Packard HP 1100 Series* HPLC System using AD-H (0.46\*25 cm, 5  $\mu$ m silica-gel, *Daicel*<sup>TM</sup>) and IC (0.46\*25 cm, 5  $\mu$ m silica-gel, *Daicel*<sup>TM</sup>) chiral columns eluting with a mixture of cyclohexane and isopropyl alcohol. Optical rotation ( $[\alpha]_D^T$ ) was measured on a *Bellingham and Stanley Ltd. ADP220* polarimeter and is quoted in (° ml)(g dm)<sup>-1</sup>. GCMS was performed on an *Agilent 6890+* with an *Agilent HP-5ms* column (15.0 m  $\times$  250  $\mu$ m  $\times$  0.30  $\mu$ m film thickness) and with an *Agilent 5973* mass detector operating at 70 eV. The method used for GCMS was: start at 50 °C and 1 ml/min, 1.85 psi, increase to 300 °C at 10 °C/min, hold for 15 min. Gas Chromatography (GC) was performed on an *Hewlett Packard HP 6890 series GC* system using an *Agilent HP-1* column (30 m  $\times$  0.32 mm  $\times$  0.25  $\mu$ m film thickness). The method used for GC was: start at 50 °C and 1.5 ml/min, 3.81 psi, increase to 300 °C at 10 °C/min, hold for 15 min.

**Chiral GC** analysis was performed on a *Hewlett Packard HP 6890 Series* GC System equipped with a *SUPELCO Beta Dext<sup>TM</sup> 120* (30 m×0.25 mm×25 µL film thickness) column combined with a FID detector. The method used for chiral GC was: start at 50 °C and 1.5 ml/min, 8.86 psi, increase to 100 °C at 5 °C/min, hold for 0 min, then increase to 150 °C at 1 °C/min, hold for 0 min, then increase to 200 °C at 1 °C/min, hold for 20 min. Emission spectra were recorded using *Jasco FP-8300* spectrofluorometer, and UV/vis absorption spectra were recorded using *Jasco V-730* spectrophotometer.

## 2. General Procedures for Coupling of Organoboronic Esters and Organolithium Reagents

### 2.1 Preparation of CF<sub>3</sub>I solution in DMSO

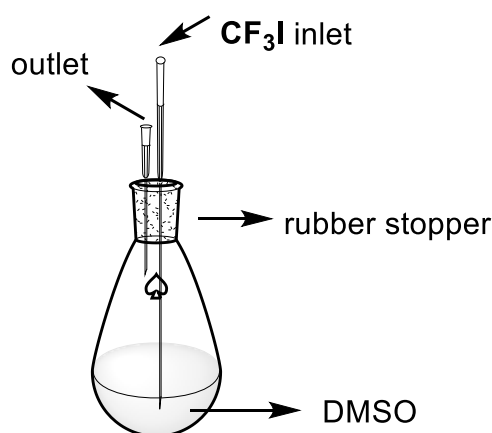

Apparatus for CF<sub>3</sub>I solution preparation

In a 10 mL flask was charged with 5 mL anhydrous DMSO under Argon flow. The flask was sealed with a rubber stopper and the mass of the flask was weighed to be  $m_1$ . After bubbling CF<sub>3</sub>I gas into the DMSO in the flask, the mass of the vial was weighed to be  $m_2$  and the volume of the solution was determined to be  $V$  by a 10 mL syringe. The concentration of the prepared CF<sub>3</sub>I solution was calculated to be  $\frac{m_2 - m_1}{V \cdot M(\text{CF}_3\text{I})}$ . ( $M(\text{CF}_3\text{I})$  is the molecular weight of CF<sub>3</sub>I)

### 2.2 General Procedure for coupling of organoboronic esters and organolithium reagents (GP1)

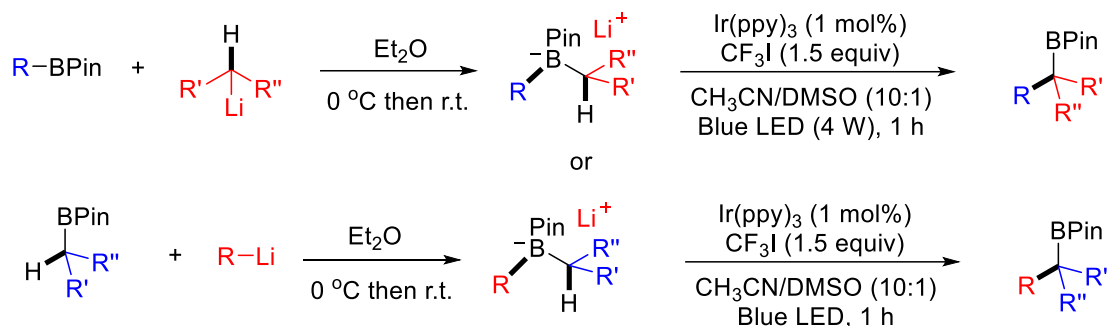

Organoboronic ester (0.20 mmol, 1.0 equiv) was dissolved in diethyl ether (2.0 mL). The alkyllithium solution (0.22 mmol, 1.1 equiv) was added dropwise over 5 min at 0 °C. The mixture was stirred at 0 °C for 30 min then room temperature for another 30 min. The solvent was carefully removed *in vacuo* and further dried for 30 min under high vacuum. After subsequent addition of Ir(ppy)<sub>3</sub> (1.3 mg, 0.002 mmol, 0.01 equiv), acetonitrile (2 mL), DMSO (0.1 mL) under argon, the mixture was stirred for 1 min until all solid was dissolved. Then CF<sub>3</sub>I (3.0 M in DMSO, 0.1 mL, 0.3 mmol, 1.5 equiv) was added to the reaction mixture and the reaction mixture was immediately irradiated by a 4 W blue LED (465 nm) and stirred for 1 h. The reaction mixture was diluted with 20 mL CH<sub>2</sub>Cl<sub>2</sub> and quenched with saturated NH<sub>4</sub>Cl aqueous solution. The organic phase was separated and dried over MgSO<sub>4</sub> and concentrated under reduced pressure. Flash column chromatography eluting with pentane and CH<sub>2</sub>Cl<sub>2</sub> afforded the desired product.

### 2.3 General Procedure for coupling of organoboronic esters and organolithium reagents (GP2)

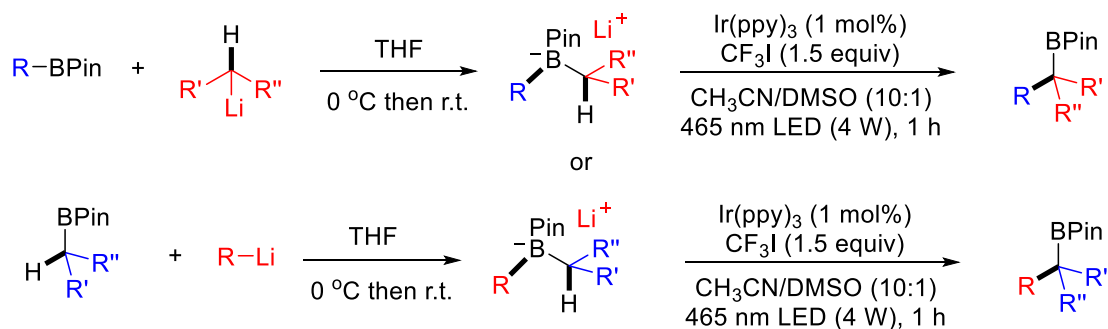

Organoboronic ester (0.20 mmol, 1.0 equiv) was dissolved in tetrahydrofuran (2.0 mL). The alkyllithium solution (0.22 mmol, 1.1 equiv) was added dropwise over 5 min at 0 °C. The mixture was stirred at 0 °C for 30 min then room temperature for another 30 min. The solvent was carefully removed *in vacuo* and further dried for 30 min under high vacuum. After subsequent addition of Ir(ppy)<sub>3</sub> (1.3 mg, 0.002 mmol, 0.01 equiv), acetonitrile (2 mL), DMSO (0.1 mL) under argon, the mixture was stirred for 1 min until all solid was dissolved. Then CF<sub>3</sub>I (3.0 M in DMSO, 0.1 mL, 0.3 mmol, 1.5 equiv) was added to the reaction mixture and the reaction mixture was immediately irradiated by a 4 W blue LED (465 nm) and stirred for 1 h. The reaction mixture was diluted with 20 mL CH<sub>2</sub>Cl<sub>2</sub> and quenched with saturated NH<sub>4</sub>Cl aqueous solution. The organic phase was separated and dried over MgSO<sub>4</sub> and concentrated



under reduced pressure. Flash column chromatography eluting with pentane and CH<sub>2</sub>Cl<sub>2</sub> afforded the desired product.

## 2.4 General Procedure for coupling of organoboronic esters and organolithium reagents (GP3)

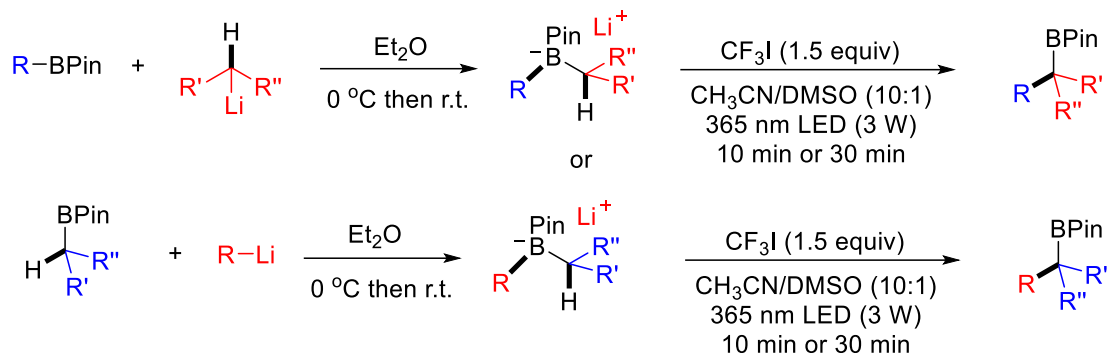

Organoboronic ester (0.20 mmol, 1.0 equiv) was dissolved in diethyl ether (2.0 mL). The alkyllithium solution (0.22 mmol, 1.1 equiv) was added dropwise over 5 min at 0 °C. The mixture was stirred at 0 °C for 30 min then room temperature for another 30 min. The solvent was carefully removed *in vacuo* and further dried for 30 min under high vacuum. After subsequent addition of acetonitrile (2 mL), DMSO (0.1 mL) under argon, the mixture was stirred for 1 min until all solid was dissolved. Then CF<sub>3</sub>I (3.0 M in DMSO, 0.1 mL, 0.3 mmol, 1.5 equiv) was added to the reaction mixture and the reaction mixture was immediately irradiated by a 3 W LED (365 nm) and stirred for 10 or 30 min. (10 min for C(sp<sup>2</sup>)-C(sp<sup>3</sup>) coupling and 30 min for C(sp<sup>3</sup>)-C(sp<sup>3</sup>) coupling) The reaction mixture was diluted with 20 mL CH<sub>2</sub>Cl<sub>2</sub> and quenched with saturated NH<sub>4</sub>Cl aqueous solution. The organic phase was separated and dried over MgSO<sub>4</sub> and concentrated under reduced pressure. Flash column chromatography eluting with pentane and CH<sub>2</sub>Cl<sub>2</sub> afforded the desired product.

## 2.5 General Procedure for coupling of organoboronic esters and organolithium reagents (GP4)

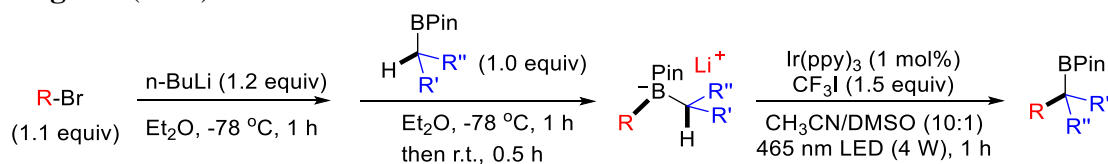

To a solution of arylbromide (0.22 mmol, 1.1 equiv) in diethyl ether (2 mL) was added a solution of *n*-butyllithium (1.6 M, 0.24 mmol, 1.2 equiv) under -78 °C over a period of 5 min. The mixture was stirred at that temperature for 1 h. Alkylboronic pinacol esters was added to the reaction mixture and stirred under -78 °C for 1 h. The mixture was then stirred at room temperature for another 30 min. The solvent was carefully removed *in vacuo* and further dried for 30 min under high vacuum. After subsequent addition of Ir(ppy)<sub>3</sub> (1.3 mg, 0.002 mmol, 0.01 equiv), acetonitrile (2 mL), DMSO (0.1 mL) under argon, the mixture was stirred for 5 min until all solid was

dissolved. Then CF<sub>3</sub>I (3.0 M in DMSO, 0.1 mL, 0.3 mmol, 1.5 equiv) was added to the reaction mixture and the reaction mixture was immediately irradiated by a 4 W blue LED and stirred for 1 h. The reaction mixture was diluted with 20 mL CH<sub>2</sub>Cl<sub>2</sub> and quenched with saturated NH<sub>4</sub>Cl aqueous solution. The organic phase was separated and dried over MgSO<sub>4</sub> and concentrated under reduced pressure. Flash column chromatography eluting with pentane and CH<sub>2</sub>Cl<sub>2</sub> afforded the desired product.

### 3. Reaction Screening

#### 3.1 General Procedure for reaction condition optimization

3,5-Bis(trifluoromethyl)phenylboronic acid pinacol ester (68.0 mg, 0.20 mmol, 1.0 equiv) was dissolved in diethyl ether (2.0 mL). *s*-Butyllithium solution (1.4 M in cyclohexane, 0.16 mL, 0.22 mmol, 1.1 equiv) was added dropwise over 5 min at 0 °C. The mixture was stirred at 0 °C for 30 min then room temperature for another 30 min. The solvent was carefully removed *in vacuo* and further dried for 30 min under high vacuum. After subsequent addition of Ir(ppy)<sub>3</sub> (1.3 mg, 0.002 mmol, 0.01 equiv) and solvent under argon. The reaction mixture was stirred for 1 min until all solid was dissolved. Then perfluoroalkyl iodide was added to the reaction mixture and the reaction mixture was immediately irradiated by a 4 W blue LED and stirred for specified time. The reaction mixture was diluted with 20 mL CH<sub>2</sub>Cl<sub>2</sub> and quenched with saturated NH<sub>4</sub>Cl aqueous solution. The organic phase was separated and dried over MgSO<sub>4</sub> and concentrated under reduced pressure. The yields were determined by crude GC analysis with *n*-C<sub>14</sub>H<sub>30</sub> as internal standard.

**Table S1.** Influence of solvents, time and oxidants.

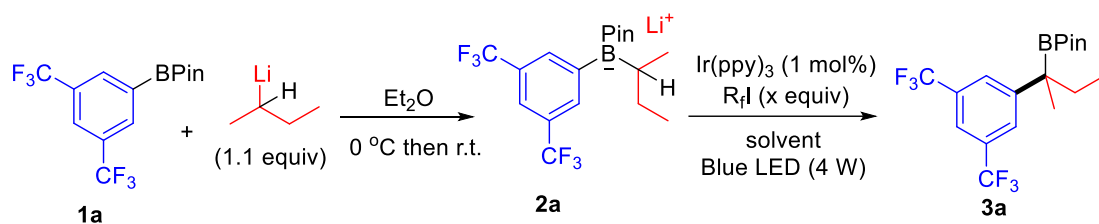

| Entry | solvent                                   | $\text{R-I}$ (x equiv)                       | time  | Yield of <b>3a</b> <sup>a</sup> |
|-------|-------------------------------------------|----------------------------------------------|-------|---------------------------------|
| 1     | $\text{CH}_3\text{CN}$                    | $\text{CF}_3\text{I}$ (1.5 equiv)            | 1 h   | 50%                             |
| 2     | DMSO                                      | $\text{CF}_3\text{I}$ (1.5 equiv)            | 1 h   | 62%                             |
| 3     | $\text{CH}_3\text{CN}/\text{DMSO}$ (10:1) | $\text{CF}_3\text{I}$ (1.5 equiv)            | 1 h   | 72% (67% <sup>b</sup> )         |
| 4     | $\text{CH}_3\text{CN}/\text{DMSO}$ (10:1) | $\text{CF}_3\text{I}$ (5.0 equiv)            | 1 h   | 67%                             |
| 5     | $\text{CH}_3\text{CN}/\text{DMSO}$ (10:1) | $\text{CF}_3\text{I}$ (1.5 equiv)            | 0.5 h | 45%                             |
| 6     | $\text{CH}_3\text{CN}/\text{DMSO}$ (10:1) | $\text{CF}_3\text{I}$ (1.5 equiv)            | 1.5 h | 71%                             |
| 7     | $\text{CH}_3\text{CN}/\text{DMSO}$ (10:1) | $n\text{-C}_3\text{F}_7\text{I}$ (1.5 equiv) | 1 h   | 21%                             |
| 8     | $\text{CH}_3\text{CN}/\text{DMSO}$ (10:1) | $n\text{-C}_4\text{F}_9\text{I}$ (1.5 equiv) | 1 h   | 37%                             |

<sup>a</sup> 0.2 mmol scale reaction, yields determined by crude GC analysis with  $n\text{-C}_{14}\text{H}_{30}$  as internal standard. <sup>b</sup> Isolated yield.

**Table S2.** Influence of photo catalysts.

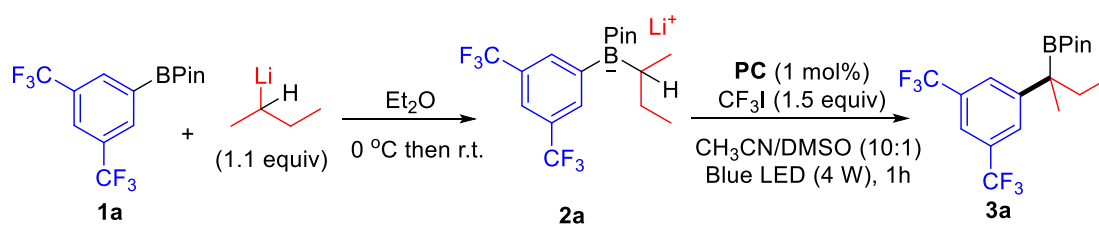

| Entry          | Photo Catalyst (PC)                  | Yield of <b>3a</b> <sup>a</sup> |
|----------------|--------------------------------------|---------------------------------|
| 1              | $\text{Ir}(\text{ppy})_3$            | 72%                             |
| 2              | $\text{Ru}(\text{bpy})_3\text{Cl}_2$ | 69%                             |
| 3              | Eosin Y                              | 70%                             |
| 4              | Eosin B                              | 17%                             |
| 5              | Rose Bengal                          | 68%                             |
| 6              | Rhodamine B base                     | 69%                             |
| 7 <sup>b</sup> | $\text{Ir}(\text{ppy})_3$            | 0%                              |
| 8              | -                                    | 0%                              |

<sup>a</sup> 0.2 mmol scale reaction, yields determined by crude GC analysis with  $n\text{-C}_{14}\text{H}_{30}$  as internal standard. <sup>b</sup> No light.

## 4. Preparation of Boronic Esters and Alkylolithium Reagents

#### 4.1 General procedure for preparation of organoboronic acid pinacol esters (GP5)

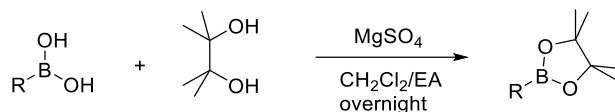

A mixture of boronic acid (1.0 equiv), pinacol (1.1 equiv) and anhydrous  $\text{MgSO}_4$  (4.0 equiv) in  $\text{CH}_2\text{Cl}_2$ /Ethyl Acetate (5:1) was stirred at room temperature overnight. The reaction mixture was filtered and the solvent removed *in vacuo*. The crude material was purified by *Kugelrohr* distillation or flash column chromatography to give the pure boronic ester. *Attention: Sometimes a rapid Kugelrohr distillation could not afford a pure enough product, further purification by flash column chromatography was needed.*

#### 4.2 General procedure for preparation of organoboronic acid pinacol esters (GP6)

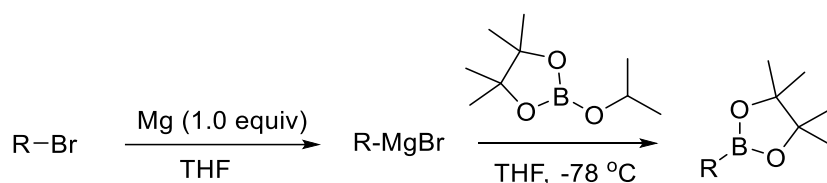

Magnesium shavings (1.0 equiv) were added to a dried flask under argon atmosphere and suspended with dry THF. A small amount of a solution of alkyl bromide (1.0 equiv) in dry THF was added to the magnesium and the activation of the Grignard formation was accelerated by addition of an iodine crystal and heating. Afterwards, the rest of the solution of alkyl bromide in THF was added dropwise. The reaction mixture was stirred until magnesium shavings disappeared. The reaction mixture was cooled to  $-78\text{ }^\circ\text{C}$ , 2-isopropoxy-4,4,5,5-tetramethyl-1,3,2-dioxaborolane (1.0 equiv) was added in one portion. The reaction mixture was stirred overnight, quenched with saturated  $\text{NH}_4\text{Cl}$  aqueous solution, and extracted with  $\text{Et}_2\text{O}$ . The combined organic layer was dried over  $\text{MgSO}_4$  and filtered. The filtrate was concentrated under reduced pressure and purified by flash column chromatography to afford the pure alkylboronic ester. *Attention: Sometimes a rapid Kugelrohr distillation could not afford a pure enough product, further purification by flash column chromatography was needed.*

#### 4.3 Preparation of organoboronic acid pinacol esters

2-(3,5-Bis(trifluoromethyl)phenyl)-4,4,5,5-tetramethyl-1,3,2-dioxaborolane (**1a**)

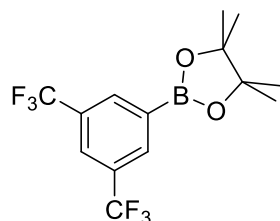

Following **GP5**, using 3,5-bis(trifluoromethyl)phenylboronic acid (5.16 g, 20 mmol) and pinacol (2.6 g, 22 mmol), purifying the crude material by passing through a short

(~4 cm) silica plug eluting with CH<sub>2</sub>Cl<sub>2</sub> and then Kugelrohr distillation (0.1 mbar, 150 °C, dry ice cooling) afforded **1a** as white solid (6.7 g, 98% yield). <sup>1</sup>H NMR (300 MHz, CDCl<sub>3</sub>) δ 8.24 (s, 2H), 7.94 (s, 1H), 1.37 (s, 12H). <sup>11</sup>B NMR (96 MHz, CDCl<sub>3</sub>) δ 30.0. <sup>19</sup>F NMR (282 MHz, CDCl<sub>3</sub>) δ -62.9 (s). Spectral data were in accordance with the literature.<sup>S1</sup>

4,4,5,5-Tetramethyl-2-(1-phenylpentan-3-yl)-1,3,2-dioxaborolane (**1e**)

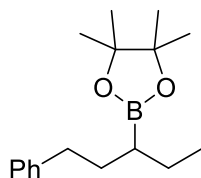

**1e** was prepared according to the reported procedure.<sup>S2</sup>

Trimethyl(4-(4,4,5,5-tetramethyl-1,3,2-dioxaborolan-2-yl)phenyl)silane (**1f**)

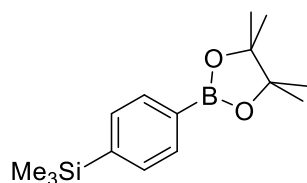

**1f** was prepared according to the reported procedure.<sup>S3</sup>

4-(4,4,5,5-Tetramethyl-1,3,2-dioxaborolan-2-yl)phenyl trifluoromethanesulfonate (**1k**)

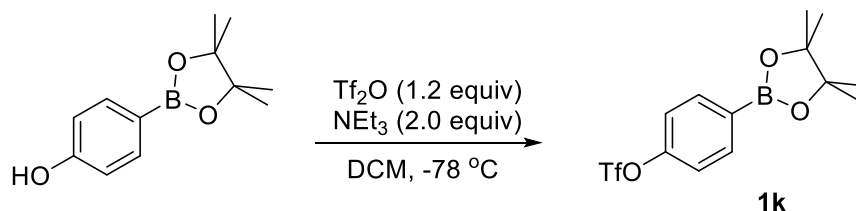

To a solution of 4-(4,4,5,5-tetramethyl-1,3,2-dioxaborolan-2-yl)phenol (1.0 g, 4.54 mmol) in CH<sub>2</sub>Cl<sub>2</sub>, was added triethylamine (0.92 g, 1.3 mL, 9.1 mmol, 2.0 equiv) at -78 °C. The mixture was allowed to stir at -78 °C for 5 min followed by dropwise addition of Tf<sub>2</sub>O (1.54 g, 0.9 mL, 5.46 mmol, 1.2 equiv). The reaction mixture was allowed to stir over night. The resulting mixture was quenched with water (approx. 20 mL), and extracted with CH<sub>2</sub>Cl<sub>2</sub> (3 × 20 mL). The combined organic layer was dried over MgSO<sub>4</sub> and filtered. The filtrate was concentrated under reduced pressure and purified by Kugelrohr distillation (0.1 mbar, 150 °C, dry ice cooling) to afford **1k** as white solid (1.3 g, 81% yield). **1k** was further purified by flash column chromatography (PENTANE/Et<sub>2</sub>O = 10:1, R<sub>f</sub> 0.4 (Pentane/Et<sub>2</sub>O = 10:1). <sup>1</sup>H NMR (300 MHz, CDCl<sub>3</sub>) δ 7.92-7.86 (m, 2H), 7.29-7.24 (m, 2H), 1.35 (s, 12H). <sup>11</sup>B NMR (96 MHz, CDCl<sub>3</sub>) δ 29.8. <sup>19</sup>F NMR (282 MHz, CDCl<sub>3</sub>) δ -72.9 (s). Spectral data were in accordance with the literature.<sup>S4</sup>

3-(4,4,5,5-Tetramethyl-1,3,2-dioxaborolan-2-yl)phenyl trifluoromethanesulfonate (**1s**)

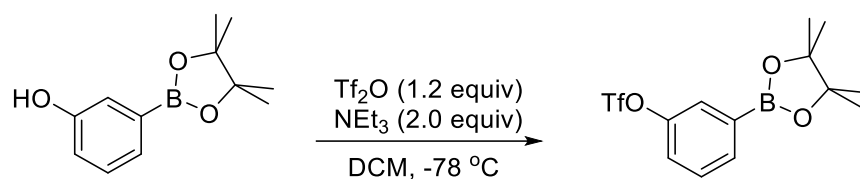

To a solution of 3-(4,4,5,5-tetramethyl-1,3,2-dioxaborolan-2-yl)phenol (2.2 g, 10 mmol) in  $\text{CH}_2\text{Cl}_2$ , was added triethylamine (2.8 mL, 20 mmol, 2.0 equiv) at  $-78\text{ }^\circ\text{C}$ . The mixture was allowed to stir at  $-78\text{ }^\circ\text{C}$  for 5 min followed by dropwise addition of  $\text{Tf}_2\text{O}$  (2.0 mL, 12 mmol, 1.2 equiv). The reaction mixture was allowed to stir overnight. The resulting mixture was quenched with water (approx. 40 mL), and extracted with  $\text{CH}_2\text{Cl}_2$  ( $3 \times 40\text{ mL}$ ). The combined organic layer was dried over  $\text{MgSO}_4$  and filtered. The filtrate was concentrated under reduced pressure and purified by Kugelrohr distillation (0.1 mbar,  $150\text{ }^\circ\text{C}$ , dry ice cooling) to afford **1s** as sticky oil (2.0 g, 57% yield). **1s** was further purified by flash column chromatography (Pentane/ $\text{Et}_2\text{O}$  = 10:1),  $R_f$  0.4 (Pentane/ $\text{Et}_2\text{O}$  = 10:1).  $^1\text{H}$  NMR (300 MHz,  $\text{CDCl}_3$ )  $\delta$  7.81 (d,  $J$  = 7.3 Hz, 1H), 7.67 (d,  $J$  = 2.5 Hz, 1H), 7.49 – 7.41 (m, 1H), 7.37 – 7.31 (m, 1H), 1.35 (s, 12H).  $^{13}\text{C}$  NMR (75 MHz,  $\text{CDCl}_3$ )  $\delta$  149.4, 134.6, 129.7, 127.0, 123.8, 118.8 (q,  $J$  = 320.5 Hz), 84.4, 24.9, carbon attached to boron not observed.  $^{11}\text{B}$  NMR (96 MHz,  $\text{CDCl}_3$ )  $\delta$  30.2.  $^{19}\text{F}$  NMR (282 MHz,  $\text{CDCl}_3$ )  $\delta$  -73.0 (s). **HRMS** (ESI)  $m/z$  = 375.0656 calcd. for  $\text{C}_{13}\text{H}_{16}\text{BF}_3\text{O}_5\text{SNa}^+$  [ $\text{M}+\text{Na}$ ] $^+$ , found: 375.0659. **FTIR** (neat):  $\nu$  ( $\text{cm}^{-1}$ ) 2984, 2936, 1572, 1490, 1422, 1354, 1331, 1247, 1205, 1167, 1136, 1095, 1071, 1004, 964, 911, 857, 830, 799, 748, 702, 670, 606.

2-(3-Chloro-4-fluorophenyl)-4,4,5,5-tetramethyl-1,3,2-dioxaborolane (**1n**)

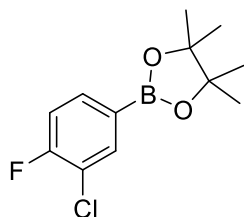

Following **GP5**, using (3-chloro-4-fluorophenyl)boronic acid (1.74 g, 10 mmol) and pinacol (1.30 g, 11 mmol, 1.1 equiv), purifying the crude material by passing through a short (~4 cm) silica plug eluting with  $\text{CH}_2\text{Cl}_2$  and then Kugelrohr distillation (0.1 mbar,  $150\text{ }^\circ\text{C}$ , dry ice cooling) afforded **1n** as white solid (2.1 g, 82% yield).  $^1\text{H}$  NMR (300 MHz,  $\text{CDCl}_3$ )  $\delta$  7.84 (dd,  $J$  = 7.9, 1.3 Hz, 1H), 7.72 – 7.61 (m, 1H), 7.18 – 7.06 (m, 1H), 1.34 (s, 12H).  $^{11}\text{B}$  NMR (96 MHz,  $\text{CDCl}_3$ )  $\delta$  30.2.  $^{19}\text{F}$  NMR (282 MHz,  $\text{CDCl}_3$ )  $\delta$  -111.2 (s). Spectral data were in accordance with the literature.<sup>S5</sup>

4,4,5,5-Tetramethyl-2-(4-(2-methyl-1,3-dioxolan-2-yl)phenyl)-1,3,2-dioxaborolane (**1y**)

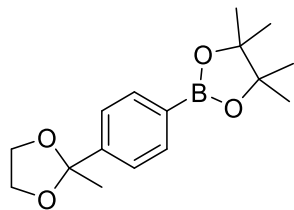

To a mixture of 1-(4-(4,4,5,5-tetramethyl-1,3,2-dioxaborolan-2-yl)phenyl)ethan-1-one (1.0 g, 4.06 mmol) and ethylene glycol (2.54 g, 2.3 mL, 41 mmol, 10 equiv) in toluene (40 mL) was added *p*-tolylsulfonic acid trihydrate (38.0 mg, 0.2 mmol, 0.05 equiv). The mixture was refluxed for 16 hours over a Dean-Stark apparatus to remove generated water. Solvent was removed under reduced pressure. The residue was purified by silica chromatography eluting with (pentane/ethyl acetate = 4:1) to afford **1y** as white solid (1.0 g, 85% yield), *R*<sub>f</sub> 0.4 (Pentane/ ethyl acetate = 3:1). <sup>1</sup>H NMR (300 MHz, CDCl<sub>3</sub>) δ 7.80 (d, *J* = 8.2 Hz, 2H), 7.49 (d, *J* = 8.2 Hz, 2H), 4.10 – 3.95 (m, 2H), 3.85 – 3.63 (m, 2H), 1.65 (s, 3H), 1.34 (s, 12H). <sup>13</sup>C NMR (75 MHz, CDCl<sub>3</sub>) δ 146.3, 134.7, 124.6, 108.8, 83.8, 64.4, 27.5, 24.9, *carbon attached to boron not observed*. <sup>11</sup>B NMR (96 MHz, CDCl<sub>3</sub>) δ 30.8. Spectral data were in accordance with the literature.<sup>S6</sup>

4,4,5,5-Tetramethyl-2-((8*R*,9*S*,13*S*,14*S*)-13-methyl-6,7,8,9,11,12,13,14,15,16-decahydrospiro[cyclopenta[*a*]phenanthrene-17,2'-[1,3]dioxolan]-3-yl)-1,3,2-dioxaborolane (**1z**)

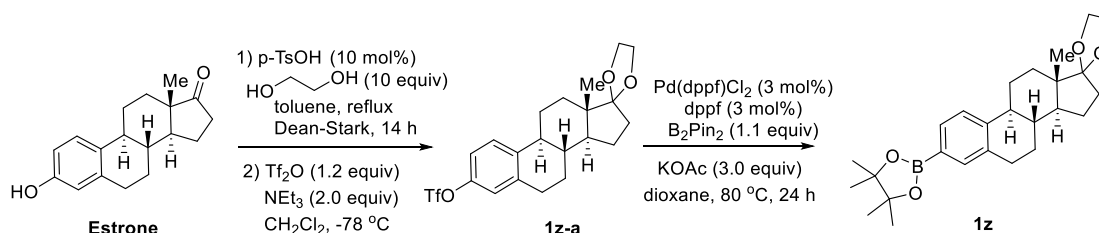

**1z-a** was synthesized from estrone according to the reported procedure.<sup>S7</sup>

To a 50 mL Schlenk tube equipped with a stirring bar was added Pd(dppf)Cl<sub>2</sub> (124 mg, 0.17 mmol, 0.03 equiv), 1,1'-bis(diphenylphosphino)ferrocene (dppf, 98 mg, 0.17 mmol, 0.03 equiv), B<sub>2</sub>Pin<sub>2</sub> (1.6 g, 6.3 mmol, 1.1 equiv), KOAc (1.67 g, 17 mmol, 3.0 equiv), **1z-a** (2.55 g, 5.7 mmol, 1.0 equiv) and then sealed. The Schlenk tube was evacuated and backfilled with Ar for 3 times. Dioxane (30 mL) was added under Ar atmosphere and the mixture was stirred at 80 °C for 24 h. After cooling to room temperature, the reaction mixture was diluted with Et<sub>2</sub>O (200 mL). The organic layer was washed with water (3 × 100 mL) and dried over anhydrous MgSO<sub>4</sub>. After filtration and concentration, the residue was purified by silica gel chromatography with pentane and ethyl acetate (Pentane/EA = 10:1) to afford **1z** as white solid (1.96 g, 81% yield). *R*<sub>f</sub> 0.4 (pentane/EA = 20:3). M.p.: 179-181 °C. [ $\alpha$ ]<sub>D</sub><sup>24</sup> +20 (*c* 0.8, CHCl<sub>3</sub>). <sup>1</sup>H NMR (300 MHz, CDCl<sub>3</sub>) δ 7.64 – 7.50 (m, 2H), 7.32 (d, *J* = 7.8 Hz, 1H), 4.08 – 3.83 (m, 4H), 3.01 – 2.82 (m, 2H), 2.52 – 2.21 (m, 2H), 2.15 – 1.73 (m, 5H), 1.72 – 1.37 (m, 6H), 1.34 (s, 12H), 0.89 (s, 3H). <sup>13</sup>C NMR (75 MHz, CDCl<sub>3</sub>) δ 143.9,

136.1, 135.5, 132.0, 124.7, 119.4, 83.6, 65.2, 64.5, 49.5, 46.1, 44.4, 38.7, 34.2, 30.7, 29.3, 26.9, 25.8, 24.8, 24.8, 22.4, 14.3, *carbon attached to boron not observed*.  $^{11}\text{B}$  NMR (96 MHz,  $\text{CDCl}_3$ )  $\delta$  30.2. **HRMS** (ESI)  $m/z$  = 447.2677 calcd. for  $\text{C}_{26}\text{H}_{37}\text{BO}_4\text{Na}^+ [\text{M}+\text{Na}]^+$ , found: 447.2678. **FTIR** (neat):  $\nu$  ( $\text{cm}^{-1}$ ) 2975, 2937, 2874, 1611, 1408, 1363, 1352, 1309, 1273, 1289, 1213, 1180, 1143, 1108, 1045, 964, 854, 725, 676.

2-((*R*)-2,8-Dimethyl-2-((4*R*,8*R*)-4,8,12-trimethyltridecyl)chroman-6-yl)-4,4,5,5-tetramethyl-1,3,2-dioxaborolane (**1aa**)

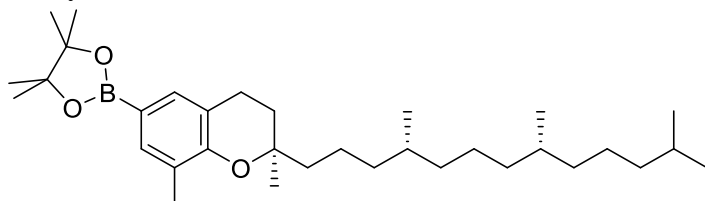

**1aa** was prepared according to the reported procedure.<sup>S8</sup>

2-(Sec-butyl)-4,4,5,5-tetramethyl-1,3,2-dioxaborolane (**4c**)

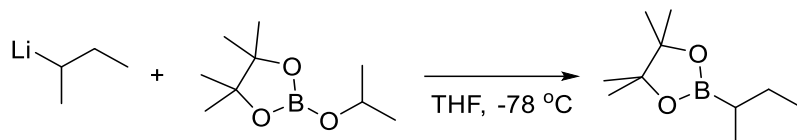

To a solution of 2-isopropoxy-4,4,5,5-tetramethyl-1,3,2-dioxaborolane (3.72 g, 4.1 mL, 20 mmol) in THF (50 mL) was added s-butyl lithium solution (1.4M in cyclohexane, 14.2 mL, 20 mmol) dropwise at  $-78\text{ }^{\circ}\text{C}$ . The mixture was stirred overnight and quenched with saturated  $\text{NH}_4\text{Cl}$  aqueous solution. The mixture was extracted with  $\text{Et}_2\text{O}$  (50 mL  $\times$  3). The organic phase was combined and dried over  $\text{MgSO}_4$ . After filtration and evaporation of solvent, the residue was purified by Kugelrohr distillation (10 mbar,  $100\text{ }^{\circ}\text{C}$ , dry ice cooling) to afford **4c** as colorless liquid (2.0 g, 54% yield). **4c** was further purified by flash column chromatography (pentane/ $\text{Et}_2\text{O}$  = 20:1),  $R_f$  0.5 (pentane/ $\text{Et}_2\text{O}$  = 20:1).  $^1\text{H}$  NMR (300 MHz,  $\text{CDCl}_3$ )  $\delta$  1.55 – 1.40 (m, 1H), 1.40 – 1.29 (m, 1H), 1.24 (s, 12H), 0.99-0.92 (m, 4H), 0.90 (t,  $J$  = 7.4 Hz, 3H). The NMR spectra were in accordance with the literature.<sup>S9</sup>

2-Cyclopropyl-4,4,5,5-tetramethyl-1,3,2-dioxaborolane (**4d**)

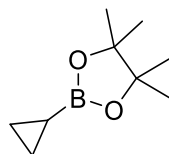

Following **GP5**, using cyclopropylboronic acid (2.58 g, 30 mmol) and pinacol (3.54 g, 30 mmol), purifying the crude material by passing through a short (~4 cm) silica plug eluting with  $\text{CH}_2\text{Cl}_2$  and then Kugelrohr distillation (10 mbar,  $80\text{ }^{\circ}\text{C}$ , dry ice cooling) afforded **4d** as colorless liquid (4.24 g, 84% yield). **4d** was further purified by flash column chromatography (Pentane/ $\text{Et}_2\text{O}$  = 20:1),  $R_f$  0.5 (pentane/ $\text{Et}_2\text{O}$  = 20:1).  $^1\text{H}$  NMR (300 MHz,  $\text{CDCl}_3$ )  $\delta$  1.22 (s, 12H), 0.65-0.57 (m, 2H), 0.55 – 0.44 (m, 2H),



-0.20 (tt,  $J = 9.2, 6.1$  Hz, 1H).  $^{11}\text{B}$  NMR (96 MHz,  $\text{CDCl}_3$ )  $\delta$  33.5. The NMR spectra were in accordance with the literature.<sup>S9</sup>

2-Cyclopentyl-4,4,5,5-tetramethyl-1,3,2-dioxaborolane (**4e**)

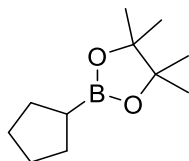

Following **GP6**, using cyclopentyl bromide (2.98 g, 2.14 mL, 20 mmol), magnesium (0.48 g, 20 mmol) and 2-isopropoxy-4,4,5,5-tetramethyl-1,3,2-dioxaborolane (3.7 g, 4.1 mL, 20 mmol), purifying the crude material by Kugelrohr distillation (10 mbar, 100 °C, dry ice cooling) afforded **4e** as colorless liquid (2.7 g, 69% yield). **4e** was further purified by flash column chromatography (Pentane/ $\text{Et}_2\text{O}$  = 20:1),  $R_f$  0.5 (pentane/ $\text{Et}_2\text{O}$  = 20:1).  $^1\text{H}$  NMR (300 MHz,  $\text{CDCl}_3$ )  $\delta$  1.82 – 1.66 (m, 2H), 1.66 – 1.35 (m, 6H), 1.23 (s, 12H), 1.21 – 1.05 (m, 1H).  $^{11}\text{B}$  NMR (96 MHz,  $\text{CDCl}_3$ )  $\delta$  34.5. The NMR spectra were in accordance with the literature.<sup>S9</sup>

2-Cyclohexyl-4,4,5,5-tetramethyl-1,3,2-dioxaborolane (**4f**)

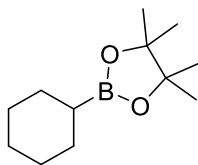

Following **GP6**, using cyclohexyl bromide (3.26 g, 2.46 mL, 20 mmol), magnesium (0.48 g, 20 mmol) and 2-isopropoxy-4,4,5,5-tetramethyl-1,3,2-dioxaborolane (3.7 g, 4.1 mL, 20 mmol), purifying the crude material by Kugelrohr distillation (10 mbar, 120°C, dry ice cooling) afforded **4f** as colorless liquid (2.45 g, 58% yield). **4f** was further purified by flash column chromatography (Pentane/ $\text{Et}_2\text{O}$  = 20:1),  $R_f$  0.5 (pentane/ $\text{Et}_2\text{O}$  = 20:1).  $^1\text{H}$  NMR (300 MHz,  $\text{CDCl}_3$ )  $\delta$  1.78 – 1.46 (m, 5H), 1.42 – 1.26 (m, 5H), 1.23 (s, 12H), 1.01 – 0.92 (m, 1H).  $^{11}\text{B}$  NMR (96 MHz,  $\text{CDCl}_3$ )  $\delta$  33.8. The NMR spectra were in accordance with the literature.<sup>S9</sup>

4,4,5,5-Tetramethyl-2-neopentyl-1,3,2-dioxaborolane (**4g**)

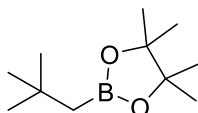

Following **GP6**, using neopentyl bromide (3.02 g, 2.5 mL, 20 mmol), magnesium (0.48 g, 20 mmol) and 2-isopropoxy-4,4,5,5-tetramethyl-1,3,2-dioxaborolane (3.7 g, 4.1 mL, 20 mmol), purifying the crude material by Kugelrohr distillation (10 mbar, 110°C, dry ice cooling) afforded **4g** as colorless liquid (2.13 g, 54% yield).  $^1\text{H}$  NMR (300 MHz,  $\text{CDCl}_3$ )  $\delta$  1.24 (s, 12H), 0.99 (s, 9H), 0.80 (s, 2H).  $^{13}\text{C}$  NMR (75 MHz,  $\text{CDCl}_3$ )  $\delta$  82.7, 32.0, 29.7, 24.9, carbon attached to boron not observed.  $^{11}\text{B}$  NMR (96 MHz,  $\text{CDCl}_3$ )  $\delta$  33.6. **HRMS** (EI)  $m/z$  = 183.1551 calcd. for  $\text{C}_{10}\text{H}_{20}\text{BO}_2^+$  [ $\text{M}-\text{CH}_3$ ] $^+$ , found: 183.1551. **FTIR** (neat):  $\nu$  ( $\text{cm}^{-1}$ ) 2979, 2952, 2870, 1466, 1354, 1318, 1269,

1247, 1214, 970, 877, 847.

2-Cyclobutyl-4,4,5,5-tetramethyl-1,3,2-dioxaborolane (**4k**)

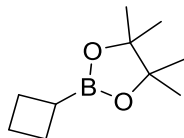

Following **GP6**, using cyclobutyl bromide (2.70 g, 20 mmol), magnesium (0.48 g, 20 mmol) and 2-isopropoxy-4,4,5,5-tetramethyl-1,3,2-dioxaborolane (3.7 g, 4.1 mL, 20 mmol), purifying the crude material by Kugelrohr distillation (10 mbar, 100°C, dry ice cooling) afforded **4k** as colorless liquid (1.2 g, 33% yield). **4k** was further purified by flash column chromatography (Pentane/Et<sub>2</sub>O = 20:1), R<sub>f</sub> 0.5 (pentane/Et<sub>2</sub>O = 20:1). <sup>1</sup>H NMR (300 MHz, CDCl<sub>3</sub>) δ 2.15 – 1.79 (m, 7H), 1.23 (s, 12H). <sup>11</sup>B NMR (96 MHz, CDCl<sub>3</sub>) δ 33.8. The NMR spectra were in accordance with the literature<sup>S9</sup>

2-Cycloheptyl-4,4,5,5-tetramethyl-1,3,2-dioxaborolane (**4n**)

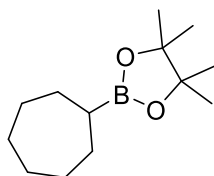

Following **GP6**, using cycloheptyl bromide (1.77 g, 10 mmol), magnesium (0.24 g, 10 mmol) and 2-isopropoxy-4,4,5,5-tetramethyl-1,3,2-dioxaborolane (1.85 g, 2.05 mL, 10 mmol), purifying the crude material by Kugelrohr distillation (1 mbar, 120°C, dry ice cooling) afforded **4n** as colorless liquid (1.0 g, 45% yield). **4n** was further purified by flash column chromatography (Pentane/Et<sub>2</sub>O = 20:1), R<sub>f</sub> 0.5 (pentane/Et<sub>2</sub>O = 20:1). <sup>1</sup>H NMR (300 MHz, CDCl<sub>3</sub>) δ 1.80 – 1.32 (m, 12H), 1.22 (s, 12H), 1.12-1.00 (m, 1H). <sup>11</sup>B NMR (96 MHz, CDCl<sub>3</sub>) δ 34.3. The NMR spectra were in accordance with the literature.<sup>S9</sup>

2-(Adamantan-2-yl)-4,4,5,5-tetramethyl-1,3,2-dioxaborolane (**4o**)

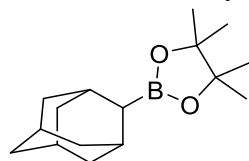

Following **GP6**, using 2-bromoadamantane (2.15g, 10 mmol), magnesium (0.24 g, 10 mmol) and 2-isopropoxy-4,4,5,5-tetramethyl-1,3,2-dioxaborolane (1.85 g, 2.05 mL, 10 mmol), purifying the crude material by flash chromatography (Pentane/Et<sub>2</sub>O = 20:1) afforded **4o** as white solid (0.35 g, 13% yield), R<sub>f</sub> 0.5 (pentane/Et<sub>2</sub>O = 20:1). <sup>1</sup>H NMR (300 MHz, CDCl<sub>3</sub>) δ 2.07-2.02 (br, 2H), 1.93 – 1.62 (m, 12H), 1.38 – 1.34 (br, 1H), 1.25 (s, 12H). <sup>13</sup>C NMR (75 MHz, CDCl<sub>3</sub>) δ 82.8, 39.4, 37.8, 36.3, 29.4, 28.3, 28.2, 24.8, *carbon attached to boron not observed*. <sup>11</sup>B NMR (96 MHz, CDCl<sub>3</sub>) δ 33.6. **FTIR** (neat): ν (cm<sup>-1</sup>) 2977, 2901, 2846, 1450, 1407, 1380, 1363, 1351, 1306, 1286, 1272, 1145, 1098, 1044, 980, 850, 737. The NMR spectra were in accordance with the

literature.<sup>S9</sup>

2-(1-Methoxypentyl)-4,4,5,5-tetramethyl-1,3,2-dioxaborolane (**4p**)

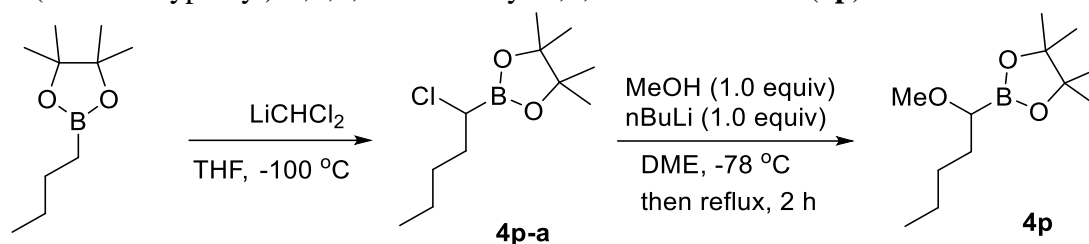

A solution of dichloromethane (2 mL, 31 mmol, 1.55 equiv) in 50 mL of THF was cooled to  $-100\text{ }^\circ\text{C}$  in a 95% ethanol/liquid nitrogen slush bath and stirred magnetically during the dropwise addition of  $n$ -butyllithium (1.6 M in hexane, 13.1 mL, 21 mmol, 1.05 equiv) by a syringe over a period of 10 min. The butyllithium must be chilled before contacting the dichloromethane solution, by running the butyllithium solution down the cold wall of the reaction flask. After about half of the butyllithium had been added, a white precipitate of (dichloromethyl)lithium formed. The solution should remain colorless or pale yellow. Darkening is a sign of overheating and decomposition. After 30 min, a solution of  $n$ -butylboronic acid pinacol ester (3.68 g, 20 mmol, 1.0 equiv) in 10 mL of diethyl ether was injected in one portion, resulting in dissolution of the precipitate of (dichloromethyl)lithium. The solution was allowed to warm slowly to  $20\text{--}25\text{ }^\circ\text{C}$  and was kept this temperature overnight. 100 mL of dichloromethane were added to precipitate the lithium chloride, the solution was filtered and concentrated under vacuum, and 2-(1-chloropentyl)-4,4,5,5-tetramethyl-1,3,2-dioxaborolane (**4p-a**) was purified by Kugelrohr distillation (10 mbar,  $100^\circ\text{C}$ , dry ice cooling) to afford a colorless liquid (3.56 g, 77% yield).  $^1\text{H}$  NMR (300 MHz,  $\text{CDCl}_3$ )  $\delta$  3.46 – 3.32 (m, 1H), 1.90 – 1.70 (m, 2H), 1.52 – 1.29 (m, 4H), 1.27 (s, 12H), 0.89 (t,  $J = 7.1\text{ Hz}$ , 3H).  $^{13}\text{C}$  NMR (75 MHz,  $\text{CDCl}_3$ )  $\delta$  84.3, 33.8, 29.5, 24.6, 24.6, 22.2, 13.9, *carbon attached to boron not observed*.  $^{11}\text{B}$  NMR (96 MHz,  $\text{CDCl}_3$ )  $\delta$  31.5. **HRMS** (ESI)  $m/z = 255.1294$  calcd. for  $\text{C}_{11}\text{H}_{22}\text{BO}_2\text{ClNa}^+ [\text{M}+\text{Na}]^+$ , found: 255.1294. **FTIR** (neat):  $\nu$  ( $\text{cm}^{-1}$ ) 2979, 2961, 2934, 2872, 1468, 1416, 1381, 1342, 1269, 1240, 1215, 1167, 1141, 1113, 967, 873, 846, 675, 652.

To anhydrous MeOH (64 mg, 2 mmol, 1.0 equiv) in DME (15 mL) was added  $n$ -butyllithium (1.6 M in hexane, 1.25 mL, 1.0 equiv) at  $-78\text{ }^\circ\text{C}$ . **4p-a** (0.46 g, 2 mmol, 1.0 equiv) was added from a syringe to the cold, stirred solution. When the mixture was warmed to room temperature, the mixture was refluxed 2 h. Filtration and evaporation of the solvent under reduced pressure gave the crude product. Kugelrohr distillation (1 mbar,  $150^\circ\text{C}$ , dry ice cooling) afforded **4p** as colorless liquid (0.2 g, 44% yield).  $^1\text{H}$  NMR (300 MHz,  $\text{CDCl}_3$ )  $\delta$  3.32 (s, 3H), 3.16 (t,  $J = 6.0\text{ Hz}$ , 1H), 1.80 – 1.50 (m, 2H), 1.40 – 1.15 (m, 4H), 1.27 (s, 12H), 0.97 – 0.83 (m, 3H).  $^{13}\text{C}$  NMR (75 MHz,  $\text{CDCl}_3$ )  $\delta$  83.8, 57.8, 30.1, 28.3, 24.9, 24.7, 22.9, 14.0, *carbon attached to boron not observed*.  $^{11}\text{B}$  NMR (96 MHz,  $\text{CDCl}_3$ )  $\delta$  32.5. **HRMS** (ESI)  $m/z = 251.1789$  calcd. for  $\text{C}_{12}\text{H}_{25}\text{BO}_3\text{Na}^+ [\text{M}+\text{Na}]^+$ , found: 251.1803. **FTIR** (neat):  $\nu$  ( $\text{cm}^{-1}$ ) 2979, 2958, 2930, 2814, 1467, 1407, 1380, 1372, 1332, 1255, 1215, 1144, 1110, 968, 855,

670.

2-(1-(Ethylthio)pentyl)-4,4,5,5-tetramethyl-1,3,2-dioxaborolane (**4q**)

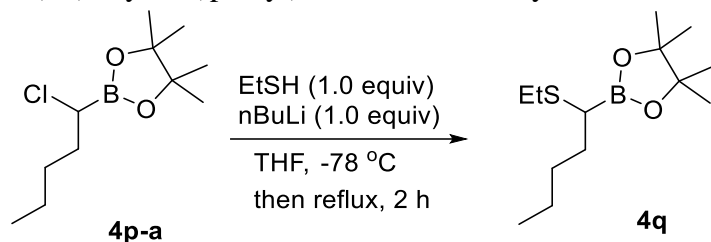

To ethanethiol (186 mg, 3 mmol, 1.0 equiv) in THF (15 mL) was added n-butyllithium (1.6 M in hexane, 2.0 mL, 1.05 equiv) at -78 °C. **4p-a** (0.70 g, 3 mmol, 1.0 equiv) was added by a syringe to the cold, stirred solution. The mixture was allowed to warm to room temperature, then the mixture was refluxed for 2 h. Filtration and evaporation of the solvent under reduced pressure gave the crude product. Flash chromatography (Pentane/Et<sub>2</sub>O = 10:1) afforded **4q** as colorless liquid (0.55 g, 71% yield). *R*<sub>f</sub> 0.3 (pentane/EtOAc = 20:1). <sup>1</sup>H NMR (300 MHz, CDCl<sub>3</sub>) δ 2.68 – 2.49 (m, 2H), 2.10 (dd, *J* = 8.4, 6.9 Hz, 1H), 1.76 – 1.53 (m, 2H), 1.41 – 1.29 (m, 4H), 1.28 – 1.19 (m, 15H), 0.93 – 0.85 (m, 3H). <sup>13</sup>C NMR (75 MHz, CDCl<sub>3</sub>) δ 83.5, 31.1, 30.8, 25.5, 24.8, 24.6, 22.6, 14.8, 14.0, *carbon attached to boron not observed*. <sup>11</sup>B NMR (96 MHz, CDCl<sub>3</sub>) δ 32.2. **HRMS** (ESI) *m/z* = 281.1717 calcd. for C<sub>13</sub>H<sub>27</sub>BO<sub>2</sub>SN<sup>+</sup> [*M*+Na]<sup>+</sup>, found: 281.1736. **FTIR** (neat): ν (cm<sup>-1</sup>) 2976, 2960, 2930, 2863, 1457, 1402, 1370, 1324, 1264, 1141, 968, 875, 847.

Tert-butyl 2-(4,4,5,5-tetramethyl-1,3,2-dioxaborolan-2-yl)pyrrolidine-1-carboxylate (**4r**)

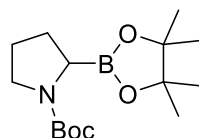

**4r** was prepared according to the reported procedure.<sup>S10</sup>

2-(5-(2,5-Dimethylphenoxy)-2-methylpentan-2-yl)-4,4,5,5-tetramethyl-1,3,2-dioxaborolane (**4u**)

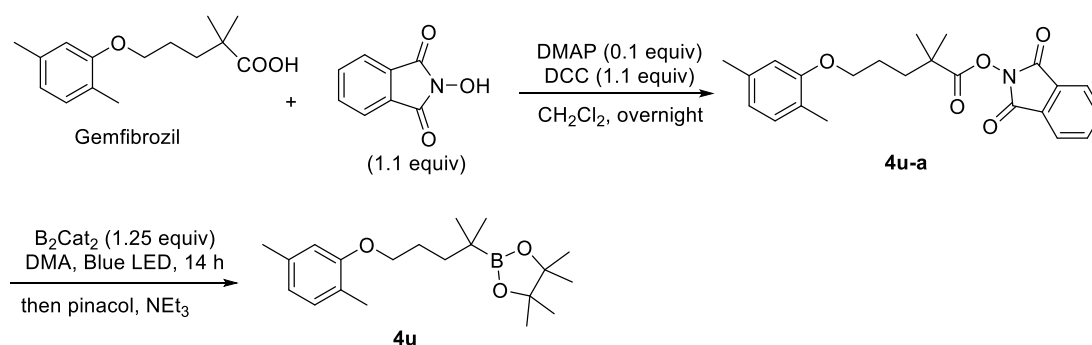

To a mixture of gemfibrozil (1.25 g, 5 mmol, 1.0 equiv), *N*-hydroxyphthalimide (0.89 g, 5.5 mmol, 1.1 equiv), 4-(*N,N*-dimethylamino)pyridine (61 mg, 0.5 mmol, 0.1 equiv)

in CH<sub>2</sub>Cl<sub>2</sub> (40 mL) was added *N,N'*-dicyclohexylcarbodiimide (1.13 g, 5.5 mmol, 1.1 equiv). The reaction mixture was stirred overnight and filtered through a pad of silica gel, rinsed with CH<sub>2</sub>Cl<sub>2</sub> (100 mL). Solvent amount was reduced under reduced pressure and the residue was purified by flash chromatography (PENTANE/EtOAc = 5:1) to afford **4u-a** as light yellow sticky oil (1.94 g, 98% yield). <sup>1</sup>H NMR (300 MHz, CDCl<sub>3</sub>) δ 7.92 – 7.84 (m, 2H), 7.83 – 7.74 (m, 2H), 7.01 (d, *J* = 7.8 Hz, 1H), 6.69-6.64 (m, 2H), 4.06-3.96 (m, 2H), 2.32 (s, 3H), 2.19 (s, 3H), 1.99-1.93 (m, 4H), 1.46 (s, 6H). **FTIR** (neat): ν (cm<sup>-1</sup>) 2975, 2930, 2871, 1807, 1783, 1743, 1615, 1585, 1509, 1468, 1371, 1265, 1187, 1157, 1131, 1044, 878, 696. The NMR spectra were identical to the literature.<sup>S11</sup>

**4u** was synthesized in 4×0.5 mmol scale according to the method reported by Aggarwal's group.<sup>S12</sup> To four Schlenk tubes were added **4u-a** (0.188 g, 0.5 mmol, 1 equiv), B<sub>2</sub>cat<sub>2</sub> (149 mg, 0.625 mmol, 1.25 equiv), DMAc (5 mL, 0.1 M) and magnetic stirrer bar, respectively. The Schlenk tubes were tightly sealed and stirred under blue LED irradiation for 14 h. The reaction solution of the four Schlenk tubes was combined and pinacol (3.0 g, 16 mmol, 8 equiv) was added by NEt<sub>3</sub> (5 mL) at 0 °C. The mixture was stirred for 1 h, then quenched by water (40 mL). After extraction with EtOAc (30×4mL), the organic layers were combined and dried over MgSO<sub>4</sub>. After filtration and evaporation of solvent under reduced pressure, the residue was purified by flash chromatography (Pentane/Et<sub>2</sub>O = 10:1) to afford **4u** as white solid (0.49 g, 74% yield). <sup>1</sup>H NMR (300 MHz, CDCl<sub>3</sub>) δ 7.01 (d, *J* = 7.3 Hz, 1H), 6.69-6.62 (m, 2H), 3.93 (t, *J* = 6.6 Hz, 2H), 2.32 (s, 3H), 2.20 (s, 3H), 1.83 – 1.70 (m, 2H), 1.51 – 1.38 (m, 2H), 1.24 (s, 12H), 0.99 (s, 6H). <sup>13</sup>C NMR (75 MHz, CDCl<sub>3</sub>) δ 157.2, 136.3, 130.2, 123.7, 120.5, 112.1, 82.9, 68.7, 37.3, 26.5, 24.8, 24.7, 21.4, 15.8, *carbon attached to boron not observed*. <sup>11</sup>B NMR (96 MHz, CDCl<sub>3</sub>) δ 35.2. **FTIR** (neat): ν (cm<sup>-1</sup>) 2977, 2939, 2864, 1615, 1586, 1509, 1475, 1389, 1370, 1308, 1265, 1210, 1139, 1130, 1038, 967, 851, 802, 693. The NMR spectra were identical to the literature.<sup>S13</sup>

2-(((1*R*,4*aS*,10*aS*)-6-Isopropyl-1,4*a*-dimethyl-1,2,3,4,4*a*,9,10,10*a*-octahydrophenanthren-1-yl)methyl)-4,4,5,5-tetramethyl-1,3,2-dioxaborolane (**4v**)

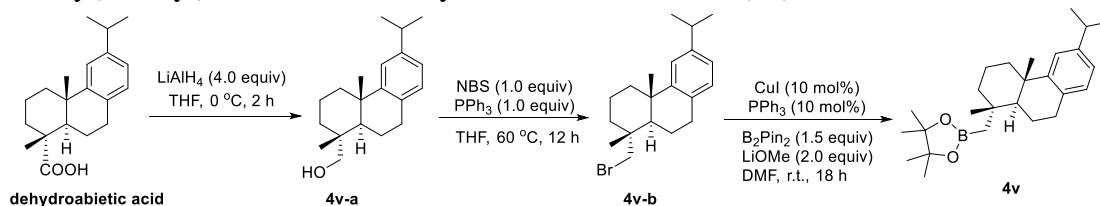

**4v-a** was synthesized according to a reported procedure.<sup>S14</sup>

To a 50 mL sealed tube was added **4v-a** (0.57 g, 2.0 mmol, 1 equiv), N-bromosuccinimide (NBS, 0.36 g, 2.0 mmol, 1.0 equiv), triphenylphosphine (PPh<sub>3</sub>, 0.52 g, 2.0 mmol, 1.0 equiv), dry THF (10 mL) and magnetic stir bar. The tube was sealed and stirred at 60 °C for 12 h. The reaction mixture was diluted with Et<sub>2</sub>O (50 mL) and washed with water (30mL×4). The organic layer was dried over MgSO<sub>4</sub>. After filtration and evaporation of solvent under reduced pressure, the residue was purified by flash chromatography (Pentane) to afford **4v-b** as colorless sticky liquid

(0.46 g, 65% yield).  $R_f$  0.5 (pentane/DCM = 10:1).  $[\alpha]_D^{24} +2$  ( $c$  0.9,  $\text{CHCl}_3$ ).  $^1\text{H}$  NMR (300 MHz,  $\text{CDCl}_3$ )  $\delta$  7.09 (d,  $J$  = 8.0 Hz, 1H), 6.91 (d,  $J$  = 8.2 Hz, 1H), 6.81 (s, 1H), 3.39 (d,  $J$  = 10.2 Hz, 1H), 3.20 (d,  $J$  = 10.2 Hz, 1H), 2.89 – 2.65 (m, 3H), 2.26 – 2.11 (m, 1H), 1.77 – 1.53 (m, 5H), 1.52 – 1.26 (m, 3H), 1.15 (s, 3H), 1.14 – 1.10 (m, 6H), 0.97 (s, 3H).  $^{13}\text{C}$  NMR (75 MHz,  $\text{CDCl}_3$ )  $\delta$  147.0, 145.6, 134.6, 126.8, 124.3, 123.9, 48.6, 45.5, 38.2, 37.5, 37.1, 36.4, 33.4, 30.0, 24.9, 24.0, 18.8, 18.7, 18.7. **HRMS** (EI)  $m/z$  = 348.1447 calcd. for  $\text{C}_{20}\text{H}_{29}\text{Br}^+ [\text{M}]^+$ , found: 348.1450. **FTIR** (neat):  $\nu$  ( $\text{cm}^{-1}$ ) 3001, 2958, 2931, 2868, 1497, 1458, 1381, 1363, 1345, 1248, 1172, 1074, 1058, 970, 1035, 909, 885, 821, 731, 665, 651, 627.

**4v** was synthesized according to Liu's procedure.<sup>S15</sup> To a 10 mL Schlenk tube was added **4v-b** (0.19 g, 0.54 mmol, 1 equiv), CuI (10.3 mg, 0.054 mmol, 0.1 equiv), triphenylphosphine ( $\text{PPh}_3$ , 14.1 mg, 0.054 mmol, 0.1 equiv),  $\text{B}_2\text{Pin}_2$  (0.21 g, 0.81 mmol, 1.5 equiv), LiOMe (41.0 mg, 1.08 mmol, 2.0 equiv) and a magnetic stir bar. The Schlenk tube was evacuated and backfilled with Ar for 3 times. DMF (1.1 mL) was added under Ar flow. The reaction mixture was stirred at room temperature for 18 h. The reaction mixture was diluted with  $\text{Et}_2\text{O}$  (50 mL) and washed with water (30 mL  $\times$  4). The organic layer was dried over  $\text{MgSO}_4$ . After filtration and evaporation of solvent under reduced pressure, the residue was purified by flash chromatography (Pentane/ $\text{Et}_2\text{O}$  = 20:1) to afford **4v** as white solid (101 mg, 47% yield).  $R_f$  0.3 (pentane/DCM = 2:1). M. p. = 133–134 °C.  $[\alpha]_D^{24} +3$  ( $c$  0.4,  $\text{CHCl}_3$ ).  $^1\text{H}$  NMR (300 MHz,  $\text{CDCl}_3$ )  $\delta$  7.16 (d,  $J$  = 8.2 Hz, 1H), 6.98 (d,  $J$  = 8.2 Hz, 1H), 6.88 (s, 1H), 3.00 – 2.73 (m, 3H), 2.26 (d,  $J$  = 12.4 Hz, 1H), 2.00 – 1.86 (m, 1H), 1.84 – 1.51 (m, 4H), 1.49 – 1.31 (m, 3H), 1.25 – 1.20 (m, 18H), 1.19 (s, 3H), 1.10 (d,  $J$  = 14.3 Hz, 1H), 1.02 (s, 3H), 0.74 (d,  $J$  = 14.3 Hz, 1H).  $^{13}\text{C}$  NMR (75 MHz,  $\text{CDCl}_3$ )  $\delta$  147.7, 145.2, 135.0, 126.8, 124.3, 123.7, 82.7, 51.6, 40.4, 38.8, 37.9, 35.9, 33.4, 30.6, 25.2, 25.0, 24.8, 24.0, 24.0, 21.8, 19.4, 19.1, carbon attached to boron not observed.  $^{11}\text{B}$  NMR (96 MHz,  $\text{CDCl}_3$ )  $\delta$  32.3. **HRMS** (ESI)  $m/z$  = 419.3092 calcd. for  $\text{C}_{26}\text{H}_{41}\text{BO}_2\text{Na}^+ [\text{M}+\text{Na}]^+$ , found: 419.3090. **FTIR** (neat):  $\nu$  ( $\text{cm}^{-1}$ ) 2958, 2926, 2869, 1498, 1458, 1419, 1378, 1351, 1319, 1213, 1146, 971, 882, 849, 821.

(S)-4,4,5,5-Tetramethyl-2-(3-methyl-1-phenylheptan-3-yl)-1,3,2-dioxaborolane (**4w**)

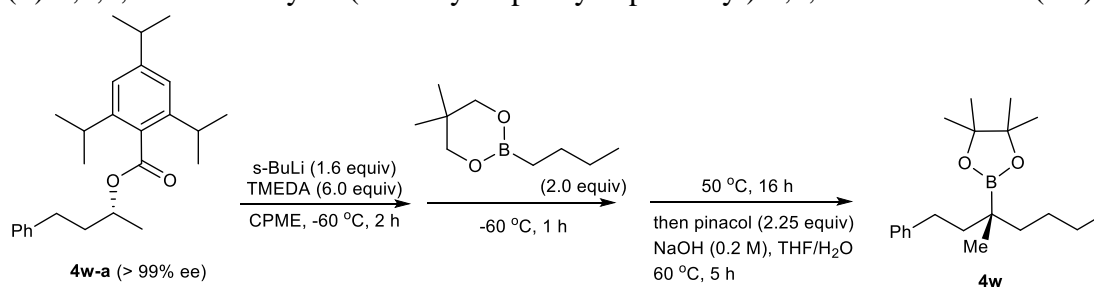

**4w** was synthesized according to Aggarwal's method.<sup>S16</sup> To a vigorously stirred solution (without splashing) of benzoate **4w-a** (0.38 g, 1.0 mmol, 1.0 equiv, synthesized according to the reported procedure<sup>S16</sup>) and TMEDA (0.92 mL, 6.0 mmol, 6.0 equiv) in anhydrous cyclopentyl methyl ether (CPME, 6 mL) at  $-60^\circ\text{C}$  (internal temperature) under a argon atmosphere, was added  $s\text{-BuLi}$  (1.4 M in cyclohexane, 1.14 mL, 1.6 mmol, 1.6 equiv) dropwise over 10 min. After 2 h, a solution of the

borylating agent (0.34 g, 2.0 mmol, 2.0 equiv) in CPME (2 ml) was added dropwise over 10 min. The reaction mixture was stirred at  $-60\text{ }^{\circ}\text{C}$  for 1 h and then the cooling bath was removed and the reaction mixture was stirred at  $50\text{ }^{\circ}\text{C}$  (migration temperature) overnight ( $\sim 16\text{ h}$ ). The volatiles were removed from the reaction mixture *in vacuo* and the residue dissolved in THF (12 ml). To the stirred solution was added pinacol (0.26 g, 2.25 mmol, 2.25 equiv) and 0.2M NaOH (aq) (1 ml). The reaction mixture was stirred for 5 h at  $60\text{ }^{\circ}\text{C}$  at which point GC/MS showed 95% conversion of the tertiary neopentyl boronic ester to the corresponding pinacol boronic ester. The reaction mixture was cooled to ambient temperature and Et<sub>2</sub>O (20 ml) and water (5 ml) was added. The phases were separated and the aqueous phase extracted with Et<sub>2</sub>O ( $3 \times 20\text{ ml}$ ). The combined organic phases were washed with brine, dried over MgSO<sub>4</sub> and the solvent removed *in vacuo*. The crude material was purified by flash column chromatography eluting with pentane/DCM (4:1) to afford **4w** as colorless liquid (0.20 g, 63% yield, 99% ee). *R<sub>f</sub>* 0.4 (pentane/DCM = 2:1). Ee value was determined by chiral HPLC after oxidation (NaOH/H<sub>2</sub>O<sub>2</sub>). <sup>17</sup> <sup>1</sup>H NMR (300 MHz, CDCl<sub>3</sub>)  $\delta$  7.24 – 7.14 (m, 2H), 7.14 – 7.04 (m, 3H), 2.59 – 2.35 (m, 2H), 1.72 – 1.56 (m, 1H), 1.52 – 1.32 (m, 2H), 1.27 – 1.12 (m, 5H), 1.18 (s, 12H), 0.92 (s, 3H), 0.82 (t, *J* = 6.8 Hz, 3H). <sup>13</sup>C NMR (75 MHz, CDCl<sub>3</sub>)  $\delta$  143.8, 128.3, 128.2, 125.4, 83.0, 41.6, 38.8, 32.4, 28.0, 24.9, 24.9, 23.6, 21.4, 14.1, *carbon attached to boron not observed*. <sup>11</sup>B NMR (96 MHz, CDCl<sub>3</sub>)  $\delta$  34.6. **HRMS** (ESI) *m/z* = 339.2466 calcd. for C<sub>20</sub>H<sub>33</sub>BO<sub>2</sub>Na<sup>+</sup> [M+Na]<sup>+</sup>, found: 339.2466. **FTIR** (neat):  $\nu$  (cm<sup>-1</sup>) 2978, 2956, 2928, 2859, 1497, 1468, 1371, 1306, 1216, 1138, 967, 855, 746, 697. **Chiral HPLC** (IC, 0.5% *i*PrOH/cyclohexane, 1.0 ml/min) *T<sub>R</sub>* 17.84 min (minor), 18.95 min (major).  $[\alpha]_D^{26}$  -12 (*c* 0.46, CHCl<sub>3</sub>).

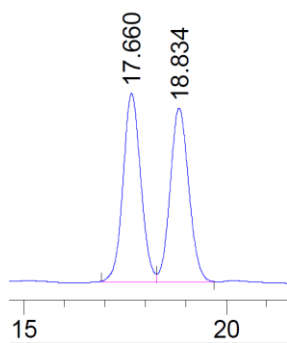

| Peak # | RetTime [min] | Type | Width [min] | Area [mAU*s] | Height [mAU] | Area %  |
|--------|---------------|------|-------------|--------------|--------------|---------|
| 1      | 17.660        | BV   | 0.4701      | 3140.21973   | 102.88875    | 50.8251 |
| 2      | 18.834        | VB   | 0.5013      | 3038.26709   | 94.95518     | 49.1749 |

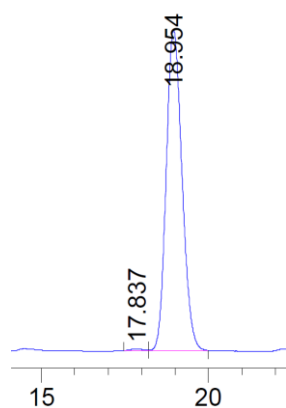

| Peak # | RetTime [min] | Type | Width [min] | Area [mAU*s] | Height [mAU] | Area %  |
|--------|---------------|------|-------------|--------------|--------------|---------|
| 1      | 17.837        | BV   | 0.3335      | 53.85359     | 1.95428      | 0.3875  |
| 2      | 18.954        | VB   | 0.5147      | 1.38426e4    | 419.85208    | 99.6125 |

(*S*)-Tert-butyl

2-(4,4,5,5-tetramethyl-1,3,2-dioxaborolan-2-yl)piperidine-1-carboxylate (**4x**)

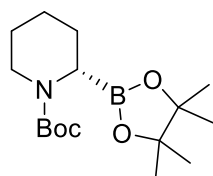

**4x** was prepared according to the reported procedure.<sup>S10</sup>

*N*-Boc-piperidine (1.85 g, 10.0 mmol, 1.00 equiv) and (-)-sparteine (2.81 g, 2.75 mL, 12.0 mmol, 1.20 equiv) were dissolved in Et<sub>2</sub>O (40 mL). The solution was cooled to -78 °C and *s*-BuLi (1.4 M in cyclohexane, 8.6 mL, 12.0 mmol, 1.20 equiv) was added dropwise. The solution was stirred for 3 h at -78 °C, then *i*-PrOB(pin) (2.42 g, 13.0 mmol, 1.30 equiv) was added dropwise. The solution was stirred for 1 h at -78 °C, then allowed to warm up to room temperature slowly. Aqueous 1 M HCl (150 mL) was added and the layers were separated. The organic layers were washed with brine (3 × 50 mL) and the combined aqueous layers were extracted with Et<sub>2</sub>O (3 × 100 mL). The organic layers were combined, dried over MgSO<sub>4</sub> and concentrated under vacuum. The crude product was purified by fast column chromatography on silica gel, eluting with pentane:EA 4:1, to give (*S*)-**4x** as a colorless oil (0.1 g, 3% yield, 73% ee). *R*<sub>f</sub> 0.3 (pentane/EA = 3:1). <sup>1</sup>H NMR (300 MHz, CDCl<sub>3</sub>) δ 3.73 (d, *J* = 12.8 Hz, 1H), 2.81 – 2.60 (m, 1H), 2.34 (dd, *J* = 12.2, 3.3 Hz, 1H), 1.90 – 1.74 (m, 1H), 1.69 – 1.55 (m, 2H), 1.49 (s, 9H), 1.46 – 1.24 (m, 3H), 1.18 (s, 12H). <sup>13</sup>C NMR (75 MHz, CDCl<sub>3</sub>) δ 139.8, 85.6, 80.0, 42.5, 28.5, 26.5, 25.2, 25.1, 24.9, 24.5, carbon attached to boron not observed. <sup>11</sup>B NMR (96 MHz, CDCl<sub>3</sub>) δ 14.9. The NMR spectra were identical to the literature.<sup>S10</sup> **Chiral HPLC** (IC, 1.5% *i*PrOH/cyclohexane, 1.0 ml/min) *T*<sub>R</sub> 6.32 min (major), 6.92 min (minor). [ $\alpha$ ]<sub>D</sub><sup>24</sup> +3 (*c* 0.7, CHCl<sub>3</sub>).



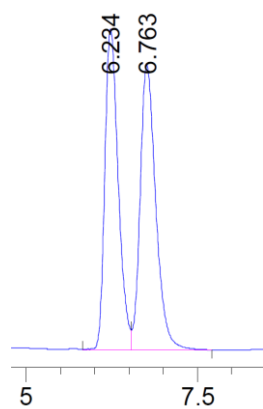

| Peak # | RetTime [min] | Type | Width [min] | Area [mAU*s] | Height [mAU] | Area %  |
|--------|---------------|------|-------------|--------------|--------------|---------|
| 1      | 6.234         | VV   | 0.2115      | 2851.35229   | 208.53979    | 49.0211 |
| 2      | 6.763         | VB   | 0.2461      | 2965.23047   | 185.88123    | 50.9789 |

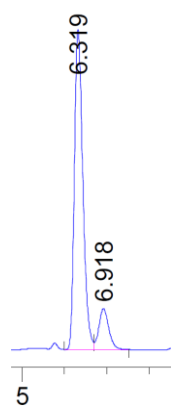

| Peak # | RetTime [min] | Type | Width [min] | Area [mAU*s] | Height [mAU] | Area %  |
|--------|---------------|------|-------------|--------------|--------------|---------|
| 1      | 6.319         | VV   | 0.2149      | 1825.63367   | 130.77518    | 86.6683 |
| 2      | 6.918         | VB   | 0.2533      | 280.82797    | 16.94997     | 13.3317 |

**4,4,5,5-Tetramethyl-2-((1S,2R,3S,5S)-2,6,6-trimethylbicyclo[3.1.1]heptan-3-yl)-1,3,2-dioxaborolane (**4y**)**

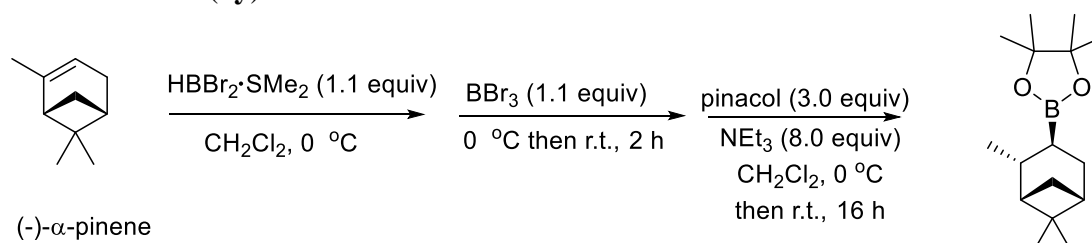

**4y** was synthesized according to the literature.<sup>S2</sup> Dibromoborane dimethyl sulfide complex (1 M in  $\text{CH}_2\text{Cl}_2$ , 11 mL, 11.0 mmol, 1.1 equiv) was added dropwise to a solution of (-)- $\alpha$ -pinene (1.36 g, 1.59 mL, 10.0 mmol, 1.0 equiv) in  $\text{CH}_2\text{Cl}_2$  (20 mL) at 0 °C. After dropwise addition of tribromoborane (1M in  $\text{CH}_2\text{Cl}_2$ , 11 mL, 11.0 mmol, 1.1 equiv), the mixture was allowed to warm up to room temperature and stirred for 2

h. This mixture was then added dropwise to a solution of pinacol (3.6 g, 30.0 mmol, 3.0 equiv) and triethylamine (11.2 mL, 80 mmol, 8.0 equiv) in CH<sub>2</sub>Cl<sub>2</sub> (40 mL) at 0 °C. The mixture was then allowed to warm up to room temperature and stirred for 16 h. The mixture was diluted with CH<sub>2</sub>Cl<sub>2</sub> (100 mL) and washed with H<sub>2</sub>O (2 x 100 mL). The organic phase was dried over Na<sub>2</sub>SO<sub>4</sub> and concentrated *in vacuo*. Flash column chromatography (pentane:DCM = 5:1) afforded compound **4y** (2.09 g, 79%) as a colorless oil. Diastereomeric ratio was determined to be 92:8 by chiral GC. R<sub>f</sub> 0.3 (pentane/DCM = 4:1).  $[\alpha]_D^{26} +12$  (c 1.0, CHCl<sub>3</sub>). (  $[\alpha]_D^{25} -10.5$  (c 1.0, CHCl<sub>3</sub>) for product from (+)- $\alpha$ -pinene <sup>S2</sup>. <sup>1</sup>H NMR (300 MHz, CDCl<sub>3</sub>)  $\delta$  2.36 – 2.23 (m, 1H), 2.20 – 1.96 (m, 2H), 1.94 – 1.79 (m, 2H), 1.79 – 1.71 (m, 1H), 1.30 – 1.20 (m, 13H), 1.17 (s, 3H), 1.07 – 0.99 (m, 6H), 0.82 (d, *J* = 9.4 Hz, 1H). <sup>13</sup>C NMR (75 MHz, CDCl<sub>3</sub>)  $\delta$  82.8, 48.0, 41.3, 38.6, 38.2, 34.1, 28.6, 28.4, 24.7, 24.7, 23.2, 22.7, carbon attached to boron not observed. <sup>11</sup>B NMR (96 MHz, CDCl<sub>3</sub>)  $\delta$  34.4. Spectroscopic data are in accordance with those described in the literature.<sup>S2</sup>

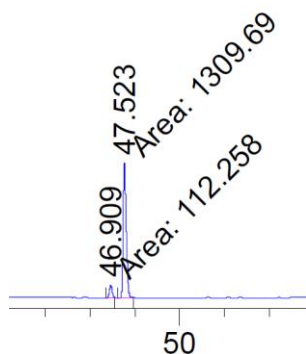

2-((1*R*,2*R*,5*R*)-2-Isopropyl-5-methylcyclohexyl)-4,4,5,5-tetramethyl-1,3,2-dioxaborolane (**4z**)

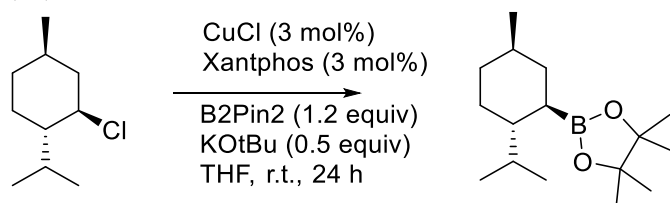

**4z** was synthesized according to a reported procedure.<sup>S2</sup>

2-((3*S*,6*S*,8*R*,9*S*,10*S*,13*R*,14*S*,17*R*)-3-Methoxy-10,13-dimethyl-17-((*R*)-6-methylheptan-2-yl)hexadecahydro-1*H*-cyclopenta[*a*]phenanthren-6-yl)-4,4,5,5-tetramethyl-1,3,2-dioxaborolane (**4aa**)

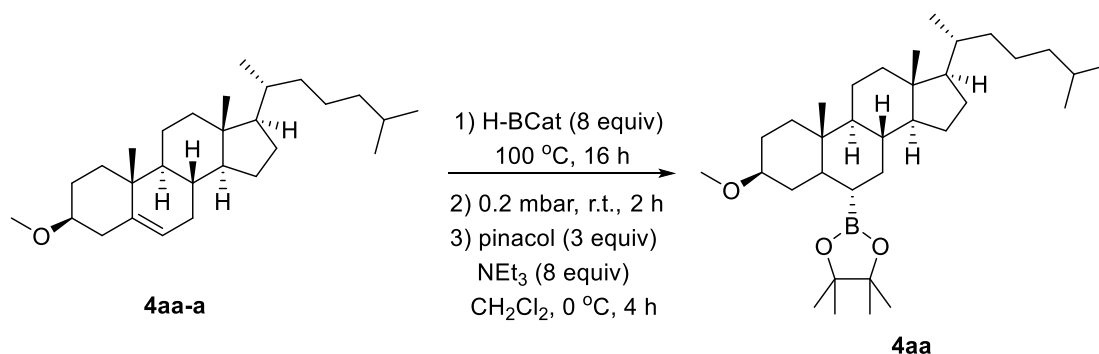

**4aa-a** was synthesized from cholesterol by a reported procedure.<sup>S18</sup>

**4aa** was synthesized according to Aggarwal's procedure.<sup>S19</sup> Freshly distilled catecholborane (0.48 g, 4.0 mmol, 8.0 equiv) was added to a Schlenk flask containing **4aa-a** (0.4 g, 0.5 mmol, 1.0 equiv). The resulting mixture was heated to 100 °C at which point it turned into a solution. After 16 h at the same temperature, the mixture was cooled to room temperature and TLC analysis (pentane:EtOAc 3:1) revealed complete consumption of **4aa-a**. Excess catecholborane was removed under high vacuum (0.2 mbar, 2 h, room temperature). The crude material was diluted with CH<sub>2</sub>Cl<sub>2</sub> (5 mL) and Et<sub>3</sub>N (0.4 g, 0.56 mL, 8.0 equiv) and pinacol (177 mg, 1.5 mmol, 3.0 equiv) were added. After 1 h the mixture was diluted with CH<sub>2</sub>Cl<sub>2</sub> (20 mL) and water (20 mL). The layers were separated and the aqueous layer was extracted with CH<sub>2</sub>Cl<sub>2</sub> (3 × 20 mL). The combined organic layers were dried (MgSO<sub>4</sub>), filtered, and concentrated under vacuum. Purification by column chromatography on silica gel, eluting with pentane:EtOAc (95:5 → 75:25) gave **4aa** as white solid (165 mg, 63% yield). M.p.: 138 – 140 °C.  $[\alpha]_D^{24} +23$  (c 1.2, CHCl<sub>3</sub>). <sup>1</sup>H NMR (300 MHz, CDCl<sub>3</sub>) δ 3.31 (s, 3H), 3.24 – 3.05 (m, 1H), 2.01 – 1.67 (m, 5H), 1.65 – 1.44 (m, 4H), 1.39 – 1.27 (m, 6H), 1.24 (s, 6H), 1.24 (s, 6H), 1.22 – 0.92 (m, 14H), 0.91 – 0.84 (m, 9H), 0.78 (s, 3H), 0.73 – 0.66 (m, 1H), 0.63 (s, 3H). <sup>13</sup>C NMR (75 MHz, CDCl<sub>3</sub>) δ 82.9, 79.8, 56.3, 55.4, 54.1, 45.3, 42.6, 40.1, 39.5, 36.7, 36.2, 35.8, 35.6, 35.6, 33.7, 33.5, 28.3, 28.0, 27.9, 24.9, 24.6, 24.2, 23.9, 22.8, 22.6, 21.2, 18.7, 12.4, 12.1, *carbon attached to boron not observed*. <sup>11</sup>B NMR (96 MHz, CDCl<sub>3</sub>) δ 32.8. **HRMS** (ESI) *m/z* = 551.4606 calcd. for C<sub>34</sub>H<sub>61</sub>BO<sub>3</sub> Na<sup>+</sup> [M+Na]<sup>+</sup>, found: 551.4625. **FTIR** (neat): ν (cm<sup>-1</sup>) 2930, 2912, 2868, 2850, 1468, 1379, 1319, 1273, 1215, 1165, 1146, 1105, 972, 931, 851.

2-((3S,6S,8R,9S,10S,13R,14S,17R)-3-chloro-10,13-dimethyl-17-((R)-6-methylheptan-2-yl)hexadecahydro-1H-cyclopenta[a]phenanthren-6-yl)-4,4,5,5-tetramethyl-1,3,2-dioxaborolane (**4ab**)

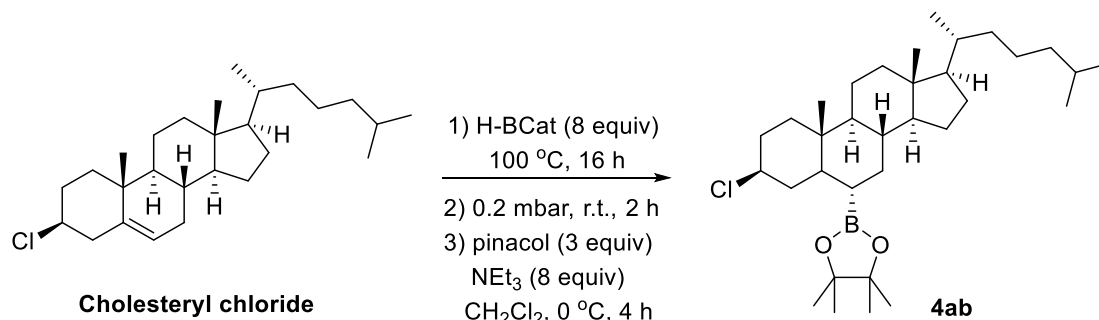

**4ab** was synthesized according to Aggarwal's procedure.<sup>S19</sup> Freshly distilled catecholborane (1.44 g, 12.0 mmol, 6.0 equiv) was added to a Schlenk flask containing cholesteryl chloride (0.81 g, 2.0 mmol, 1.0 equiv). The resulting mixture was heated to 100 °C at which point it turned into a solution. After 16 h at the same temperature, the mixture was cooled to room temperature and TLC analysis (pentane:DCM 2:1) revealed complete consumption of cholesteryl chloride. Excess catecholborane was removed under high vacuum (0.2 mbar, 2 h, room temperature). The crude material was diluted with CH<sub>2</sub>Cl<sub>2</sub> (5 mL) and Et<sub>3</sub>N (1.62 g, 2.2 mL, 16 mmol, 8.0 equiv) and pinacol (0.72 g, 6.0 mmol, 3.0 equiv) were added. After 1 h the mixture was diluted with CH<sub>2</sub>Cl<sub>2</sub> (20 mL) and water (20 mL). The layers were separated and the aqueous layer was extracted with CH<sub>2</sub>Cl<sub>2</sub> (3 × 20 mL). The combined organic layers were dried (MgSO<sub>4</sub>), filtered, and concentrated under vacuum. Purification by column chromatography on silica gel, eluting with pentane:DCM (5:1→3:1) gave **4ab** as white solid (0.87 g, 86% yield). R<sub>f</sub> 0.4 (pentane/DCM = 2:1). M.p.: 171-172 °C. [α]<sub>D</sub><sup>24</sup> +47 (c 0.8, CHCl<sub>3</sub>). <sup>1</sup>H NMR (300 MHz, CDCl<sub>3</sub>) δ 4.04 – 3.75 (m, 1H), 2.09 – 1.90 (m, 2H), 1.88 – 1.69 (m, 4H), 1.67 – 1.41 (m, 6H), 1.39 – 1.27 (m, 6H), 1.24 (s, 12H), 1.15 – 0.95 (m, 10H), 0.93 – 0.80 (m, 13H), 0.74 – 0.67 (m, 1H), 0.63 (s, 3H). <sup>13</sup>C NMR (75 MHz, CDCl<sub>3</sub>) δ 83.0, 60.3, 56.3, 56.2, 53.8, 47.3, 42.6, 40.0, 39.5, 39.1, 38.5, 36.2, 35.8, 35.6, 35.1, 33.5, 33.1, 28.2, 28.0, 24.8, 24.7, 24.2, 23.9, 22.8, 22.6, 21.1, 18.7, 12.4, 12.1, *carbon attached to boron not observed*. <sup>11</sup>B NMR (96 MHz, CDCl<sub>3</sub>) δ 34.4. **HRMS** (ESI) *m/z* = 555.4111 calcd. for C<sub>33</sub>H<sub>58</sub>BClO<sub>2</sub>Na<sup>+</sup> [M+Na]<sup>+</sup>, found: 555.4121. **FTIR** (neat): ν (cm<sup>-1</sup>) 2937, 2868, 2848, 1468, 1444, 1378, 1320, 1273, 1229, 1214, 1167, 1145, 969, 850, 896, 850, 756.

#### 4.4 Preparation of organolithium reagents

Cyclohexyllithium solution in hexane

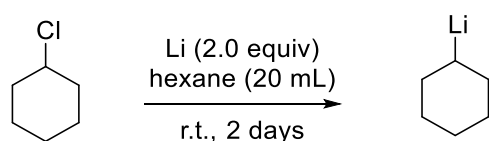

A Schlenk flask was flushed with dry Argon gas. After charging the flask with dry hexane (20 ml) and lithium sand (280 mg, 40 mmol, 2.0 equiv), cyclohexyl chloride (2.36 g, 20 mmol, 1.0 equiv) was added slowly. The reaction mixture was stirred at high speed (1000 rpm) for 2 days. The upper clear solution was transferred to a dry Schlenk tube flushed with Argon via syringe. The concentration of cyclohexyllithium was titrated to be 0.53 mol/L by menthol/2,2'-bipyridine.

*Titration procedure:* An oven dried 25 mL three neck flask equipped with an Argon inlet adapter, a stirring bar and two rubber septa, was cooled under a stream of Argon. Upon cooling the flask was charged with menthol (99.7 mg, 0.639 mmol), 3 mg of 2,2'-dipyridyl (as indicator) and 5 mL of dry Et<sub>2</sub>O. To the resulting solution is added the organometallic reagent solution at 0 °C via a 1.0 mL syringe (graduated in 0.01 mL increments) in a dropwise fashion. 1.21 mL of the cyclohexyllithium solution was used.

The calculated concentration was  $0.639 \text{ mmol}/1.21 \text{ mL} = 0.53 \text{ mol/L}$ .

**Caution:** During addition, it will be observed that periodic quantities of a red colored substance will appear in solution. This is the charge transfer complex between the alkyl lithium and 2,2'-dipyridyl, and it will be noted that in the early stages of this titration this red color will disperse rapidly. As one nears the endpoint, the red coloration will require longer periods of time to disperse. At this point, it is necessary to slow the rate of addition of the alkyl lithium reagent as the endpoint is approaching. Eventually, the addition of a single drop of alkyl lithium will cause a persistent red coloration of the solution. This is the endpoint of the titration.

#### Cyclopentyllithium solution in hexane

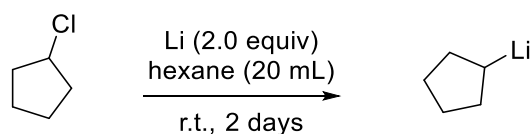

A Schlenk flask was flushed with dry Argon gas. After charging the flask with dry hexane (20 ml) and lithium sand (280 mg, 40 mmol, 2.0 equiv), cyclopentyl chloride (2.08 g, 20 mmol, 1.0 equiv) was added slowly. The reaction mixture was stirred at high speed (1000 rpm) for 1 day. The upper clear solution was transferred to a dry Schlenk tube flushed with Argon. The concentration of cyclopentyllithium was determined to be 0.62 mol/L by menthol/2,2'-bipyridine with the titration procedure presented above.

#### Cyclopropanyllithium lithium bromide complex solution in Et<sub>2</sub>O

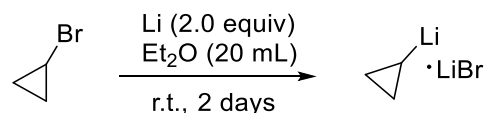

A Schlenk flask was flushed with dry Argon gas. After charging the flask with dry Et<sub>2</sub>O (20 ml) and lithium sand (280 mg, 40 mmol, 2.0 equiv), cyclopropyl bromide (2.42 g, 1.6 mL, 20 mmol, 1.0 equiv) was added slowly. The reaction mixture was stirred at high speed (1000 rpm) for 1 day. The upper clear solution was transferred to a dry Schlenk tube flushed with Argon. The concentration of cyclopropanyllithium lithium bromide complex solution was determined to be 1.17 mol/L by menthol/2,2'-bipyridine with the titration procedure presented above.

## 5. Mechanistic Studies

### 5.1 Stern-Volmer Fluorescence Quenching Experiments

All *fac*-Ir(ppy)<sub>3</sub> solutions were excited at 420 nm and the emission intensity was collected at 528 nm. In a typical experiment, the solution of *fac*-Ir(ppy)<sub>3</sub> in a mixture solvent of CH<sub>3</sub>CN/DMSO (10:1) (178 μM) was added the appropriate amount of quencher (solution in CH<sub>3</sub>CN/DMSO (10:1)) in a screw-top 1.0 cm quartz cuvette. After degassing with Argon for 3 min, the emission spectra of the samples were collected (**Figure S1**).

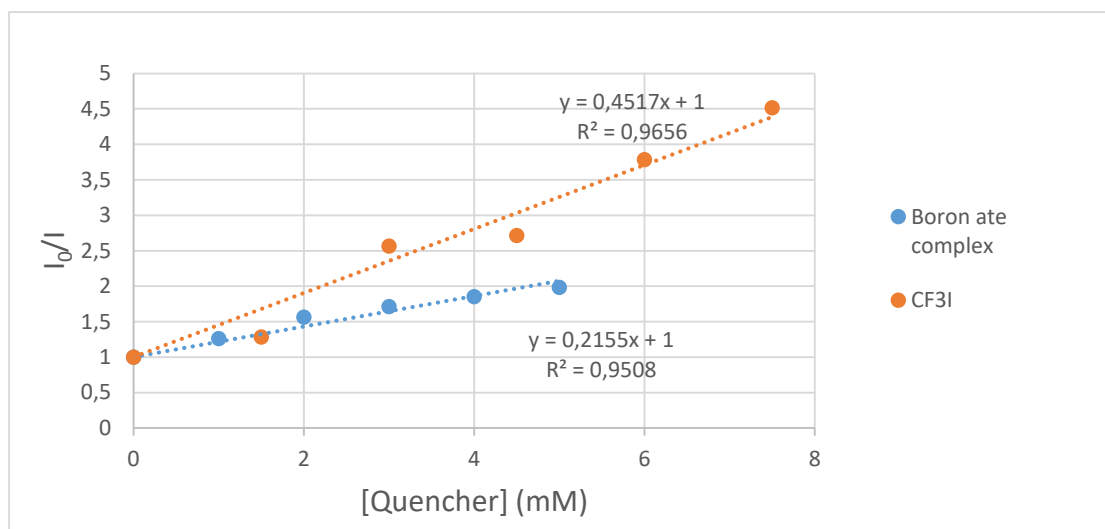

**Figure S1.** *Fac*-Ir(ppy)<sub>3</sub> Solutions Quenched by Boron Ate Complex and CF<sub>3</sub>I.

## 5.2 Quantum Yield Analysis

The quantum yield of this reaction was determined by chemical actinometry. Following a similar procedure reported by Melchiorre<sup>S20</sup> and Glorius<sup>S21</sup>, an aqueous solution of potassium ferrioxalate was prepared and stored in the dark. This actinometer solution measures the photodecomposition of ferric oxalate anions to ferrous oxalate anions, which are then reacted with 1,10-phenanthroline to form [Fe(phen)<sub>3</sub>]<sup>2+</sup>. The concentration of this complex is then estimated by UV/Vis absorbance at 510 nm. The number of moles of [Fe(phen)<sub>3</sub>]<sup>2+</sup> complex formed is related to the numbers of photons absorbed by the actinometer solution.

Preparation of the solutions used for the quantum yield measurements:

1. Potassium ferrioxalate solution: Potassium ferrioxalate trihydrate (294 mg) and 95-98% H<sub>2</sub>SO<sub>4</sub> (140  $\mu$ L) were added to a 50 mL volumetric flask and filled to the mark with distilled water.
2. Buffer solution: Sodium acetate (4.94 g) and 95-98% H<sub>2</sub>SO<sub>4</sub> (1.0 mL) were added to a 100 mL volumetric flask and filled to the mark with distilled water.

*The actinometry measurements:*

a) 1 mL of the actinometer solution was taken in a quartz cuvette ( $l = 1$  cm). This solution was placed 5 cm away from a 4 W blue LED ( $\lambda_{\text{max}} = 455$  nm) and irradiated for 15 s. The same process was repeated for different time intervals: 30, 45, 60 s.

b) After irradiation, the actinometer solution was transferred to a 10 mL volumetric flask containing 1.0 mg of 1,10-phenanthroline in 2 mL of buffer solution. The flask was filled to the mark with distilled water. In a similar manner, a blank solution was also prepared using the actinometer solution stored in dark.

c) The absorbance of the actinometer solution after complexation with 1,10-phenanthroline at  $\lambda = 510$  nm was measured by UV/Vis spectrophotometry.

d) According to Beer's law, the number of moles of Fe<sup>2+</sup> formed ( $x$ ) for each sample was determined by:

$$Fe^{2+} = \frac{v_1 v_3 \Delta A(510 \text{ nm})}{10^3 v_2 l \varepsilon(510 \text{ nm})}$$

Where:

$v_1$  = Irradiated volume (1 mL).

$v_2$  = The aliquot of the irradiated solution taken for the estimation of  $Fe^{2+}$  ions (1 mL).

$v_3$  = Final volume of the solution after complexation with 1,10-phenanthroline (10 mL).

$\varepsilon(510 \text{ nm})$  = Molar extinction coefficient of  $[Fe(Phen)_3]^{2+}$  complex ( $11100 \text{ L mol}^{-1} \text{cm}^{-1}$ ).

$l$  = Optical path-length of the cuvette (1 cm)

$\Delta A(510 \text{ nm})$  = Difference in absorbance between the irradiated solution and the solution stored in dark (blank)

e) The number of moles of  $Fe^{2+}$  formed (x) was plotted as a function of time (t) (**Figure S2**). The slope (dx/dt) of the line is equal to the number of moles of  $Fe^{2+}$  formed per unit time.

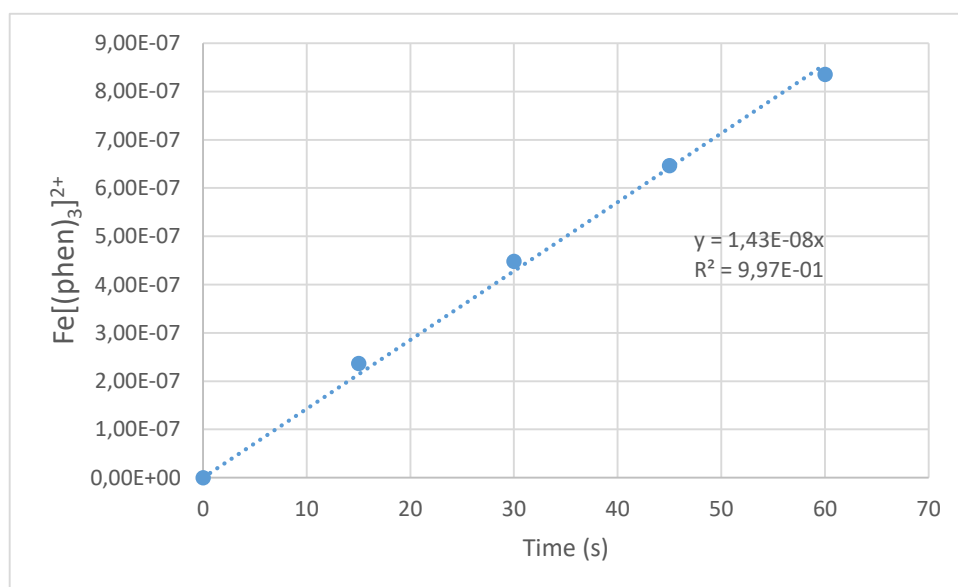

**Figure S2.** Moles of  $[Fe(phen)_3]^{2+}$  per unit of time formed due to decomposition of the actinometer solution at 4 W blue LED ( $\lambda_{\text{max}} = 455 \text{ nm}$ ) irradiation.

f) This slope (dx/dt) was correlated to the number of moles of incident photons per unit time ( $F$  = photon flux) by using following equation:

$$\Phi(\lambda) = \frac{dx/dt}{F(1 - 10^{-A(\lambda)})}$$

$\Phi(\lambda)$  = The quantum yield for  $Fe^{2+}$  formation at 450 nm is 0.9.<sup>S22</sup>

g)  $A(\lambda)$  = Absorbance of the ferrioxalate actinometer solution at a wavelength of 455 nm, which was measured placing 1 mL of the solution in a cuvette of pathlength 1 cm by UV/Vis spectrophotometry. We obtained an absorbance value of 0.246.

h) The determined incident photons per unit time (**F**) is  $3.68 \times 10^{-8}$  einsteins/s.

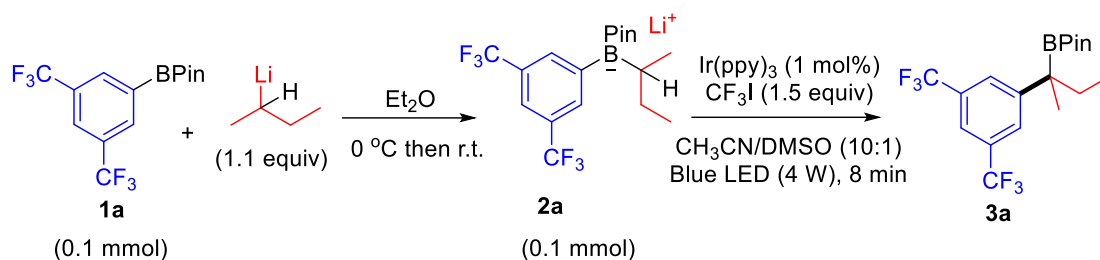

i) The number of moles of product formed upon irradiation of a reaction on 0.1 mmol scale of **2a** in 1 mL solvent (CH<sub>3</sub>CN/DMSO 10:1) using the same reaction setup used before for the actinometer was determined by crude GC analysis using *n*-C<sub>14</sub>H<sub>30</sub> as internal standard after 1 min of light irradiation. 19% of product was generated. Before irradiation, the measured absorbance of the reaction solution at 455 nm by UV/Vis spectrophotometry was 1.700. Using the following equation, the quantum yield of the reaction was determined to be 8.8:

$$\Phi(455 \text{ nm}) = \frac{\text{moles of product}}{F(1 - 10^{-A(\lambda)})t}$$

$$= \frac{0.1 \times 10^{-3} \times 0.19 \text{ mol}}{3.68 \times 10^{-8} \frac{\text{einsteins}}{\text{s}} (1 - 10^{-1.7}) \times 60\text{s}} = 8.8$$

### 5.3 Proposed Mechanisms

#### 5.3.1 Smart initiation by oxidative quenching

According to the results of Stern-Volmer fluorescence quenching experiments, the excited photo catalyst (**PC\***) was mainly quenched by CF<sub>3</sub>I. A quantum yield of 8.8 indicated a radical chain process (**Figure S3**).

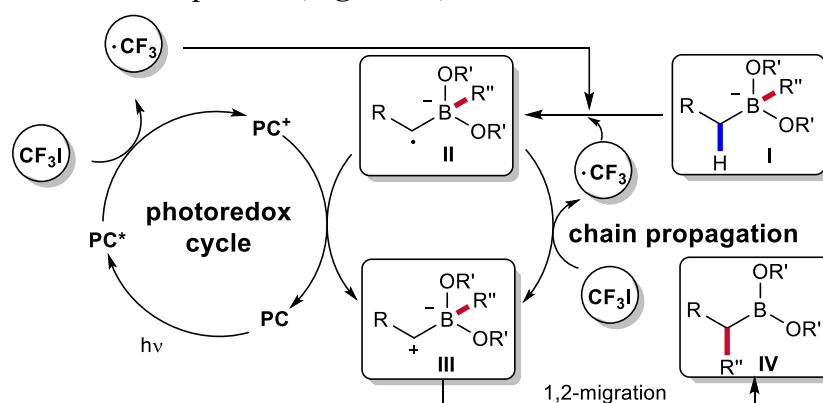

**Figure S3.** Possible reaction pathway initiated by oxidative quenching.

The radical chain process was initiated by a photoredox process. For the photoredox cycle, the photo catalyst Ir(ppy)<sub>3</sub> was excited by blue LED light to Ir(ppy)<sub>3</sub>\* {*E*<sub>1/2</sub><sup>red</sup>[Ir<sup>IV</sup>/Ir<sup>III</sup>\*] = -1.73 V vs SCE in MeCN}<sup>S23</sup>, which would reduce CF<sub>3</sub>I {*E*<sub>p</sub> = -1.52 V vs SCE in DMF}<sup>S24</sup> to release CF<sub>3</sub> radical. CF<sub>3</sub> radical would abstract the α-H of the boron ate complex **I** to afford the radical anion intermediate **II**. **II** could be further oxidized to zwitterion **III** by the oxidized photo catalyst Ir(ppy)<sub>3</sub><sup>+</sup> {*E*<sub>1/2</sub><sup>red</sup>[Ir<sup>IV</sup>/Ir<sup>III</sup>] = +0.77 V vs SCE in MeCN}<sup>S23</sup>, regenerating Ir(ppy)<sub>3</sub>. 1,2-Migration



of R'' group from **III** would give the final product **IV**.

For the radical chain propagation process, another equivalent of hydrogen atom abstractor, CF<sub>3</sub> radical, was released when radical anion **II** was oxidized to zwitterion **III** by CF<sub>3</sub>I.<sup>S17,25,26</sup>

### 5.3.2 Smart initiation by reductive quenching

According to the results of Stern-Volmer fluorescence quenching experiments, the excited photo catalyst (PC\*) was also quenched by the boronate complex **I** (minor pathway). The possibility of smart initiation by reductive quenching could not be excluded (**Figure S4**). The excited photo catalyst Ir(ppy)<sub>3</sub>\* {E<sub>1/2</sub><sup>red</sup>[Ir<sup>III</sup>\*/Ir<sup>II</sup>] = +0.31 V vs SCE in MeCN}<sup>S23</sup> could oxidize the boronate complex **I** (E<sub>p/2</sub> = +0.31 V vs SCE in CH<sub>3</sub>CN)<sup>S27</sup>, releasing an alkyl radical ·R''. Then the reduced photo catalyst Ir(ppy)<sub>3</sub><sup>-</sup> {E<sub>1/2</sub><sup>red</sup>[Ir<sup>III</sup>/Ir<sup>II</sup>] = -2.19 V vs SCE in MeCN}<sup>S23</sup> reduce CF<sub>3</sub>I to CF<sub>3</sub> radical to initiate the chain reaction. CF<sub>3</sub> radical could also be generated by iodine atom transfer from CF<sub>3</sub>I to radical ·R''.

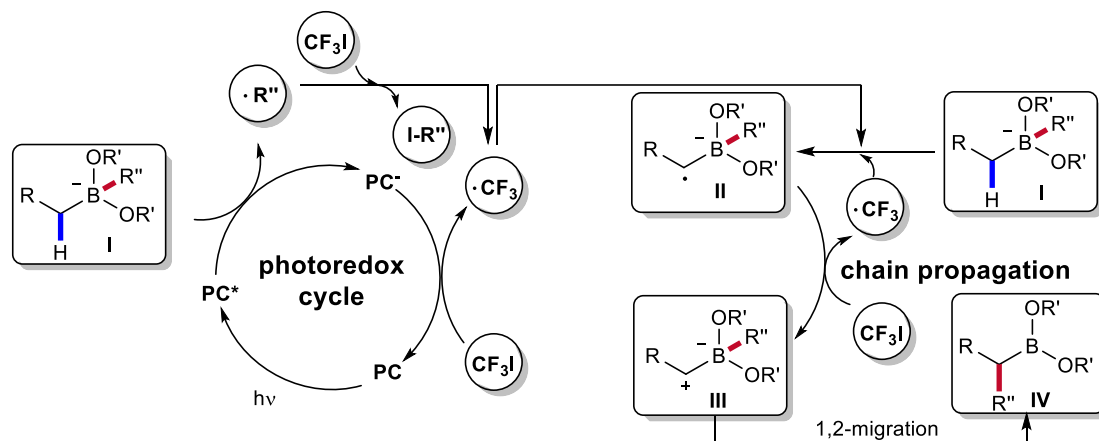

**Figure S4.** Possible reaction pathway initiated by reductive quenching.

## 6. Product Characterization

2-(2-(3,5-Bis(trifluoromethyl)phenyl)butan-2-yl)-4,4,5,5-tetramethyl-1,3,2-dioxaborolane (**3a**)

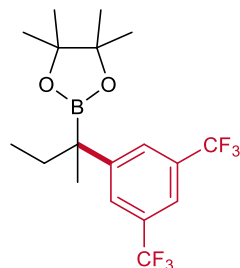

Following **GP1**, using **1a** (68.0 mg, 0.2 mmol) and *s*-butyllithium (1.4 M in cyclohexane, 0.16 mL, 0.22 mmol), flash chromatography eluting with pentane/DCM (5:1) afforded **3a** as colorless liquid (53.1 mg, 67% yield). R<sub>f</sub> 0.5 (pentane/DCM = 4:1). <sup>1</sup>H NMR (300 MHz, CDCl<sub>3</sub>) δ 7.78 (s, 2H), 7.66 (s, 1H), 1.96-1.84 (m, 1H), 1.79-1.67 (m, 1H), 1.37 (s, 3H), 1.22 (s, 12H), 0.84 (t, *J* = 7.4 Hz, 3H). <sup>13</sup>C NMR (75

MHz, CDCl<sub>3</sub>)  $\delta$  150.3, 131.1 (q,  $J$  = 32.7 Hz), 127.5-127.2 (m), 123.7 (q,  $J$  = 272.5 Hz), 119.89 – 118.71 (m), 83.9, 32.0, 24.6, 24.5, 20.8, 9.9, *carbon attached to boron not observed*. <sup>19</sup>F NMR (282 MHz, CDCl<sub>3</sub>)  $\delta$  -62.8. <sup>11</sup>B NMR (96 MHz, CDCl<sub>3</sub>)  $\delta$  33.6. **HRMS** (EI)  $m/z$  = 396.1690 calcd. for C<sub>18</sub>H<sub>23</sub>BF<sub>6</sub>O<sub>2</sub><sup>+</sup> [M]<sup>+</sup>, found: 396.1688. **FTIR** (neat):  $\nu$  (cm<sup>-1</sup>) 2981, 1463, 1369, 1320, 1274, 1169, 1126, 965, 895, 851, 708, 682.

According to crude GC analysis with *n*-C<sub>14</sub>H<sub>30</sub> as internal standard, GC yield of **3a** was 72% and recovered yield of **1a** was 18%.

2-(2-(3,5-Bis(trifluoromethyl)phenyl)propan-2-yl)-4,4,5,5-tetramethyl-1,3,2-dioxaborolane (**3b**)

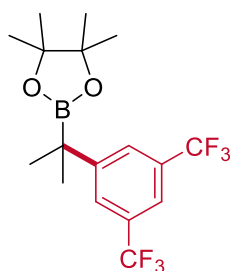

Following **GP1**, using **1a** (68.0 mg, 0.2 mmol) and isopropyllithium (0.7 M in pentane, 0.31 mL, 0.22 mmol), flash chromatography eluting with pentane/DCM (5:1) afforded **3b** as colorless liquid (50.8 mg, 66% yield).  $R_f$  0.6 (pentane/DCM = 4:1). <sup>1</sup>H NMR (300 MHz, CDCl<sub>3</sub>)  $\delta$  7.76 (s, 2H), 7.66 (s, 1H), 1.39 (s, 6H), 1.21 (s, 12H). <sup>13</sup>C NMR (75 MHz, CDCl<sub>3</sub>)  $\delta$  151.5, 131.1 (q,  $J$  = 32.7 Hz), 126.9 – 126.5 (m), 123.7 (q,  $J$  = 272.6 Hz), 119.1 (dd,  $J$  = 7.7, 3.9 Hz), 83.9, 25.3, 24.4, *carbon attached to boron not observed*. <sup>19</sup>F NMR (282 MHz, CDCl<sub>3</sub>)  $\delta$  -62.8. <sup>11</sup>B NMR (96 MHz, CDCl<sub>3</sub>)  $\delta$  33.7. **HRMS** (EI)  $m/z$  = 382.1533 calcd. for C<sub>17</sub>H<sub>21</sub>BF<sub>6</sub>O<sub>2</sub><sup>+</sup> [M]<sup>+</sup>, found: 382.1538. **FTIR** (neat):  $\nu$  (cm<sup>-1</sup>) 2980, 2937, 2880, 1462, 1369, 1319, 1274, 1169, 1125, 965, 895, 878, 851, 708, 682. According to crude GC analysis with *n*-C<sub>14</sub>H<sub>30</sub> as internal standard, GC yield of **3b** was 82% and recovered yield of **1a** was 8%.

Following **GP3**, using **1a** (68.0 mg, 0.2 mmol) and isopropyllithium (0.7 M in pentane, 0.31 mL, 0.22 mmol), flash chromatography eluting with pentane/DCM (5:1) afforded **3b** as colorless liquid (42.0 mg, 55% yield).  $R_f$  0.6 (pentane/DCM = 4:1). <sup>1</sup>H NMR (300 MHz, CDCl<sub>3</sub>)  $\delta$  7.76 (s, 2H), 7.66 (s, 1H), 1.39 (s, 6H), 1.21 (s, 12H). <sup>13</sup>C NMR (75 MHz, CDCl<sub>3</sub>)  $\delta$  151.5, 131.1 (q,  $J$  = 32.7 Hz), 126.9 – 126.5 (m), 123.7 (q,  $J$  = 272.6 Hz), 119.1 (dd,  $J$  = 7.7, 3.9 Hz), 83.9, 25.3, 24.4, *carbon attached to boron not observed*. <sup>19</sup>F NMR (282 MHz, CDCl<sub>3</sub>)  $\delta$  -62.8. <sup>11</sup>B NMR (96 MHz, CDCl<sub>3</sub>)  $\delta$  33.7. **HRMS** (EI)  $m/z$  = 382.1533 calcd. for C<sub>17</sub>H<sub>21</sub>BF<sub>6</sub>O<sub>2</sub><sup>+</sup> [M]<sup>+</sup>, found: 382.1538. **FTIR** (neat):  $\nu$  (cm<sup>-1</sup>) 2980, 2937, 2880, 1462, 1369, 1319, 1274, 1169, 1125, 965, 895, 878, 851, 708, 682. According to crude GC analysis with *n*-C<sub>14</sub>H<sub>30</sub> as internal standard, GC yield of **3b** was 76% and recovered yield of **1a** was 11%.

2-(1-(3,5-Bis(trifluoromethyl)phenyl)cyclopentyl)-4,4,5,5-tetramethyl-1,3,2-dioxaborolane (**3c**)

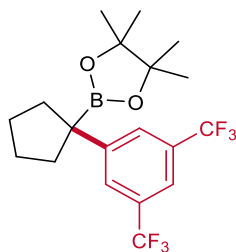

Following **GP1**, using **1a** (68.0 mg, 0.2 mmol) and cyclopentylolithium (0.62 M in hexane, 0.355 mL, 0.22 mmol), flash chromatography eluting with pentane/DCM (4:1) afforded **3c** as colorless sticky oil (51.7 mg, 63% yield).  $R_f$  0.5 (pentane/DCM = 4:1).  $^1\text{H}$  NMR (300 MHz,  $\text{CDCl}_3$ )  $\delta$  7.71 (s, 2H), 7.63 (s, 1H), 2.46 – 2.27 (m, 2H), 1.78-1.63 (m, 7H), 1.37 – 1.18 (m, 2H), 1.15 (s, 12H).  $^{13}\text{C}$  NMR (75 MHz,  $\text{CDCl}_3$ )  $\delta$  150.0, 130.7 (t,  $J = 32.7$  Hz), 127.3-127.1 (m), 123.6 (q,  $J = 272.6$  Hz), 119.5 – 118.4 (m), 83.9, 35.2, 24.4, 24.3, *carbon attached to boron not observed*.  $^{19}\text{F}$  NMR (282 MHz,  $\text{CDCl}_3$ )  $\delta$  -62.8.  $^{11}\text{B}$  NMR (96 MHz,  $\text{CDCl}_3$ )  $\delta$  33.4. **HRMS** (ESI)  $m/z$  = 431.1588 calcd. for  $\text{C}_{19}\text{H}_{23}\text{BF}_6\text{O}_2\text{Na}$   $[\text{M}+\text{Na}]^+$ , found: 431.1583. **FTIR** (neat):  $\nu$  ( $\text{cm}^{-1}$ ) 2978, 2960, 2873, 1456, 1372, 1320, 1275, 1167, 1130, 982, 893, 854, 708, 682. According to crude GC analysis with  $n\text{-C}_{14}\text{H}_{30}$  as internal standard, GC yield of **3c** was 72% and recovered yield of **1a** was 18%.

Following **GP3**, using **1a** (68.0 mg, 0.2 mmol) and cyclopentylolithium (0.62 M in hexane, 0.355 mL, 0.22 mmol), flash chromatography eluting with pentane/DCM (4:1) afforded **3c** as colorless sticky oil (49.8 mg, 61% yield).  $R_f$  0.5 (pentane/DCM = 4:1).  $^1\text{H}$  NMR (300 MHz,  $\text{CDCl}_3$ )  $\delta$  7.71 (s, 2H), 7.63 (s, 1H), 2.46 – 2.27 (m, 2H), 1.78-1.63 (m, 7H), 1.37 – 1.18 (m, 2H), 1.15 (s, 12H).  $^{13}\text{C}$  NMR (75 MHz,  $\text{CDCl}_3$ )  $\delta$  150.0, 130.7 (t,  $J = 32.7$  Hz), 127.3-127.1 (m), 123.6 (q,  $J = 272.6$  Hz), 119.5 – 118.4 (m), 83.9, 35.2, 24.4, 24.3, *carbon attached to boron not observed*.  $^{19}\text{F}$  NMR (282 MHz,  $\text{CDCl}_3$ )  $\delta$  -62.8.  $^{11}\text{B}$  NMR (96 MHz,  $\text{CDCl}_3$ )  $\delta$  33.4. **HRMS** (ESI)  $m/z$  = 431.1588 calcd. for  $\text{C}_{19}\text{H}_{23}\text{BF}_6\text{O}_2\text{Na}$   $[\text{M}+\text{Na}]^+$ , found: 431.1583. **FTIR** (neat):  $\nu$  ( $\text{cm}^{-1}$ ) 2978, 2960, 2873, 1456, 1372, 1320, 1275, 1167, 1130, 982, 893, 854, 708, 682. According to crude GC analysis with  $n\text{-C}_{14}\text{H}_{30}$  as internal standard, GC yield of **3c** was 66% and recovered yield of **1a** was 17%.

2-(1-(3,5-Bis(trifluoromethyl)phenyl)butyl)-4,4,5,5-tetramethyl-1,3,2-dioxaborolane (**3d**)

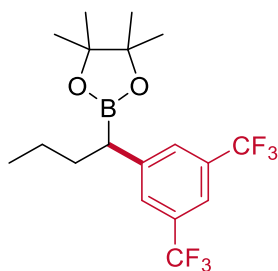

Following **GP1**, using **1a** (68.0 mg, 0.2 mmol) and  $n$ -butyllithium (1.6 M in hexane, 0.14 mL, 0.22 mmol), flash chromatography eluting with pentane/DCM (5:1) afforded

**3d** as colorless liquid (27.0 mg, 34% yield).  $R_f$  0.6 (pentane/DCM = 4:1).  $^1\text{H}$  NMR (300 MHz,  $\text{CDCl}_3$ )  $\delta$  7.69 – 7.60 (m, 3H), 2.46 (t,  $J$  = 7.9 Hz, 1H), 1.95 – 1.80 (m, 1H), 1.73 – 1.57 (m, 1H), 1.33 – 1.24 (m, 2H), 1.20 (s, 12H), 0.91 (t,  $J$  = 7.3 Hz, 3H).  $^{13}\text{C}$  NMR (75 MHz,  $\text{CDCl}_3$ )  $\delta$  146.3, 131.3 (q,  $J$  = 32.8 Hz), 128.5, 123.6 (q,  $J$  = 272.6 Hz), 120.0 – 118.8 (m), 83.8, 34.7, 24.6, 24.5, 22.3, 14.0, *carbon attached to boron not observed*.  $^{19}\text{F}$  NMR (282 MHz,  $\text{CDCl}_3$ )  $\delta$  -62.9.  $^{11}\text{B}$  NMR (96 MHz,  $\text{CDCl}_3$ )  $\delta$  33.5. **HRMS** (EI)  $m/z$  = 396.1690 calcd. for  $\text{C}_{18}\text{H}_{23}\text{BF}_6\text{O}_2^+ [\text{M}]^+$ , found: 396.1691. **FTIR** (neat):  $\nu$  ( $\text{cm}^{-1}$ ) 2979, 2935, 2875, 1467, 1433, 1373, 1332, 1276, 1167, 1128, 967, 896, 707, 682. According to crude GC analysis with  $n\text{-C}_{14}\text{H}_{30}$  as internal standard, GC yield of **3d** was 34% and recovered yield of **1a** was 39%.

2-(3-(3,5-Bis(trifluoromethyl)phenyl)-1-phenylpentan-3-yl)-4,4,5,5-tetramethyl-1,3,2-dioxaborolane (**3e**)

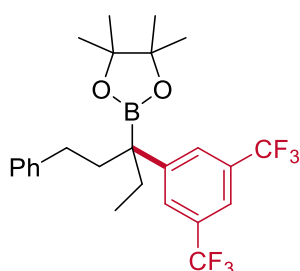

Following **GP4**, using **1e** (52.0 mg, 0.19 mmol), 1-bromo-3,5-bis(trifluoromethyl)benzene (64.5 mg, 0.22 mmol) and  $n$ -butyllithium (1.6 M in hexane, 0.15 mL, 0.24 mmol), flash chromatography eluting with pentane/DCM (1:1) afforded **3e** as light yellow oil (26.6 mg, 29% yield).  $R_f$  0.4 (pentane/DCM = 1:1).  $^1\text{H}$  NMR (300 MHz,  $\text{CDCl}_3$ )  $\delta$  7.74 (s, 2H), 7.61 (s, 1H), 7.23 – 7.01 (m, 5H), 2.39 – 2.22 (m, 2H), 2.12 – 2.00 (m, 2H), 1.90 (q,  $J$  = 7.4 Hz, 2H), 1.18 (s, 12H), 0.76 (t,  $J$  = 7.4 Hz, 3H).  $^{13}\text{C}$  NMR (75 MHz,  $\text{CDCl}_3$ )  $\delta$  148.4, 142.5, 131.1 (q,  $J$  = 32.8 Hz), 128.4, 128.3, 128.0 – 127.8 (m), 125.9, 123.7 (q,  $J$  = 272.7 Hz), 119.3, 83.9, 37.1, 31.7, 27.7, 24.7, 9.4, *carbon attached to boron not observed*.  $^{19}\text{F}$  NMR (282 MHz,  $\text{CDCl}_3$ )  $\delta$  -62.8.  $^{11}\text{B}$  NMR (96 MHz,  $\text{CDCl}_3$ )  $\delta$  33.2. **HRMS** (ESI)  $m/z$  = 509.2057 calcd. for  $\text{C}_{25}\text{H}_{29}\text{BF}_6\text{NaO}_2^+ [\text{M}+\text{Na}]^+$ , found: 509.2060. **FTIR** (neat):  $\nu$  ( $\text{cm}^{-1}$ ) 2981, 2936, 2879, 1455, 1371, 1323, 1274, 1167, 1126, 966, 889, 853, 798, 750, 724, 709, 699, 682. According to crude GC analysis with  $n\text{-C}_{14}\text{H}_{30}$  as internal standard, the crude yield of 3,5-bis(trifluoromethyl)phenylboronic acid pinacol ester was 35%.

Trimethyl(4-(2-(4,4,5,5-tetramethyl-1,3,2-dioxaborolan-2-yl)butan-2-yl)phenyl)silane (**3f**)

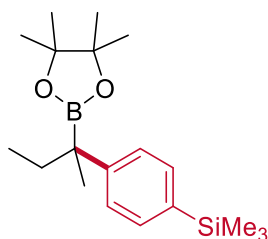

Following **GP1**, using **1f** (55.2 mg, 0.2 mmol) and *s*-butyllithium (1.4 M in hexane, 0.16 mL, 0.22 mmol), flash chromatography eluting with pentane/DCM (5:1) afforded **3f** as yellow oil (34.8 mg, 52% yield).  $R_f$  0.4 (pentane/DCM = 4:1).  $^1\text{H}$  NMR (300 MHz,  $\text{CDCl}_3$ )  $\delta$  7.48 – 7.39 (m, 2H), 7.34 – 7.27 (m, 2H), 1.94 – 1.82 (m, 1H), 1.76 – 1.66 (m, 1H), 1.33 (s, 1H), 1.23 (s, 6H), 1.23 (s, 6H), 0.85 (t,  $J$  = 7.4 Hz, 2H), 0.25 (s, 9H).  $^{13}\text{C}$  NMR (75 MHz,  $\text{CDCl}_3$ )  $\delta$  148.1, 136.1, 133.1, 126.3, 83.3, 32.0, 24.7, 24.6, 21.2, 10.2, -1.0, *carbon attached to boron not observed*.  $^{11}\text{B}$  NMR (96 MHz,  $\text{CDCl}_3$ )  $\delta$  33.9. **HRMS** (ESI)  $m/z$  = 355.2235 calcd. for  $\text{C}_{19}\text{H}_{33}\text{BO}_2\text{SiNa}^+$   $[\text{M}+\text{Na}]^+$ , found: 355.2250. **FTIR** (neat):  $\nu$  ( $\text{cm}^{-1}$ ) 2978, 2958, 1598, 1458, 1372, 1345, 1315, 1248, 1139, 1087, 1043, 982, 835, 817, 753, 726, 691, 673.

2-(2-(4-(Tert-butyl)phenyl)butan-2-yl)-4,4,5,5-tetramethyl-1,3,2-dioxaborolane (**3g**)

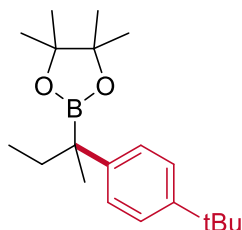

Following **GP1**, using **1g** (52.0 mg, 0.2 mmol) and *s*-butyllithium (1.4 M in hexane, 0.16 mL, 0.22 mmol), flash chromatography eluting with pentane/DCM (5:1) afforded **3g** as yellow oil (38.3 mg, 61% yield).  $R_f$  0.5 (pentane/DCM = 3:1).  $^1\text{H}$  NMR (300 MHz,  $\text{CDCl}_3$ )  $\delta$  7.24 – 7.09 (m, 4H), 1.76 – 1.72 (m, 1H), 1.64 – 1.52 (m, 1H), 1.23 – 1.21 (m, 12H), 1.14 (s, 6H), 1.14 (s, 6H), 0.76 (t,  $J$  = 7.4 Hz, 3H).  $^{13}\text{C}$  NMR (75 MHz,  $\text{CDCl}_3$ )  $\delta$  147.5, 144.2, 126.4, 124.8, 83.2, 34.2, 32.1, 31.4, 24.6, 24.6, 21.4, 10.3, *carbon attached to boron not observed*.  $^{11}\text{B}$  NMR (96 MHz,  $\text{CDCl}_3$ )  $\delta$  33.7. **HRMS** (ESI)  $m/z$  = 339.2466 calcd. for  $\text{C}_{20}\text{H}_{33}\text{O}_2\text{BNa}^+$   $[\text{M}+\text{Na}]^+$ , found: 339.2491. **FTIR** (neat):  $\nu$  ( $\text{cm}^{-1}$ ) 2965, 2939, 2871, 1512, 1461, 1380, 1364, 1351, 1308, 1269, 1140, 1114, 1017, 965, 851, 827, 794.

4,4,5,5-Tetramethyl-2-(2-(*p*-tolyl)butan-2-yl)-1,3,2-dioxaborolane (**3h**)

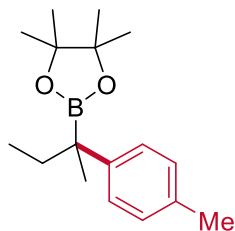

Following **GP2**, using **1h** (43.6 mg, 0.2 mmol) and *s*-butyllithium (1.4 M in hexane, 0.16 mL, 0.22 mmol), flash chromatography eluting with pentane/DCM (4:1) afforded **3h** as yellow oil (18.2 mg, 33% yield).  $R_f$  0.4 (pentane/DCM = 3:1).  $^1\text{H}$  NMR (300 MHz,  $\text{CDCl}_3$ )  $\delta$  7.21 (d,  $J$  = 8.2 Hz, 2H), 7.09 (d,  $J$  = 8.2 Hz, 2H), 2.31 (s, 3H), 1.92 – 1.80 (m, 1H), 1.74 – 1.60 (m, 1H), 1.31 (s, 3H), 1.22 (s, 6H), 1.21 (s, 6H), 0.83 (t,  $J$  = 7.4 Hz, 3H).  $^{13}\text{C}$  NMR (75 MHz,  $\text{CDCl}_3$ )  $\delta$  144.3, 134.2, 128.7, 126.7, 83.2, 32.0, 24.6, 24.6, 21.1, 20.9, 10.1, *carbon attached to boron not observed*.  $^{11}\text{B}$  NMR (96 MHz,  $\text{CDCl}_3$ )  $\delta$  34.4. **HRMS** (ESI)  $m/z$  = 297.1996 calcd. for  $\text{C}_{17}\text{H}_{27}\text{BO}_2\text{Na}^+$

$[M+Na]^+$ , found: 297.2009. **FTIR** (neat):  $\nu$  ( $\text{cm}^{-1}$ ) 2976, 2930, 2877, 1512, 1457, 1379, 1377, 1347, 1307, 1264, 1214, 1138, 1096, 1043, 1020, 965, 849, 815, 723, 673, 576. According to GC analysis with  $n\text{-C}_{14}\text{H}_{30}$  as internal standard, GC yield of **3h** was 34% and recovered yield of **1h** was 33%.

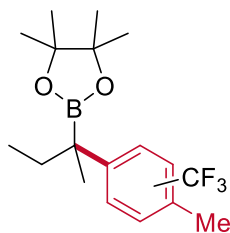

About 10% trifluoromethylated **3h** was also detected ( $o/m = 1:1.2$ ) by crude GC and GC/MS.

#### 4,4,5,5-Tetramethyl-2-(2-phenylbutan-2-yl)-1,3,2-dioxaborolane (**3i**)

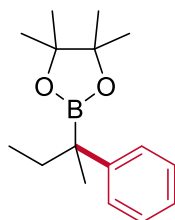

Following **GP1**, using **1i** (40.8 mg, 0.2 mmol) and *s*-butyllithium (1.4 M in hexane, 0.16 mL, 0.22 mmol), flash chromatography eluting with pentane/DCM (4:1) afforded **3i** as yellow oil (31.1 mg, 60% yield).  $R_f$  0.4 (pentane/DCM = 3:1).  $^1\text{H}$  NMR (300 MHz,  $\text{CDCl}_3$ )  $\delta$  7.28 – 7.14 (m, 4H), 7.08 – 7.02 (m, 1H), 1.88 – 1.72 (m, 1H), 1.70 – 1.55 (m, 1H), 1.25 (s, 3H), 1.14 (s, 6H), 1.13 (s, 6H), 0.75 (t,  $J = 7.4$  Hz, 3H).  $^{13}\text{C}$  NMR (75 MHz,  $\text{CDCl}_3$ )  $\delta$  147.3, 128.0, 126.9, 124.9, 83.2, 31.9, 24.6, 21.0, 10.0, carbon attached to boron not observed.  $^{11}\text{B}$  NMR (96 MHz,  $\text{CDCl}_3$ )  $\delta$  33.8. **HRMS** (ESI)  $m/z = 283.1840$  calcd. for  $\text{C}_{16}\text{H}_{25}\text{BO}_2\text{Na}^+$   $[M+Na]^+$ , found: 283.1851. **FTIR** (neat):  $\nu$  ( $\text{cm}^{-1}$ ) 2976, 2931, 2876, 1600, 1495, 1458, 1371, 1348, 1309, 1264, 1215, 1139, 1099, 1031, 965, 856, 763, 699.

#### 2-(2-(4-Chlorophenyl)butan-2-yl)-4,4,5,5-tetramethyl-1,3,2-dioxaborolane (**3j**)

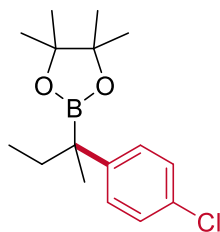

Following **GP1**, using **1j** (47.6 mg, 0.2 mmol) and *s*-butyllithium (1.4 M in hexane, 0.16 mL, 0.22 mmol), flash chromatography eluting with pentane/DCM (4:1) afforded **3j** as yellow sticky oil (34.5 mg, 59% yield).  $R_f$  0.4 (pentane/DCM = 3:1).  $^1\text{H}$  NMR (300 MHz,  $\text{CDCl}_3$ )  $\delta$  7.18-7.15 (m, 4H), 1.82 – 1.70 (m, 1H), 1.66 – 1.54 (m, 1H), 1.22 (s, 3H), 1.13 (s, 6H), 1.12 (s, 6H), 0.73 (t,  $J = 7.4$  Hz, 3H).  $^{13}\text{C}$  NMR (75 MHz,

CDCl<sub>3</sub>)  $\delta$  145.8, 130.7, 128.3, 128.0, 83.4, 31.9, 24.6, 24.7, 20.9, 9.8, *carbon attached to boron not observed*. <sup>11</sup>B NMR (96 MHz, CDCl<sub>3</sub>)  $\delta$  34.2. **HRMS** (ESI)  $m/z$  = 317.1450 calcd. for C<sub>16</sub>H<sub>24</sub>BClO<sub>2</sub>Na<sup>+</sup> [M+Na]<sup>+</sup>, found: 317.1459. **FTIR** (neat):  $\nu$  (cm<sup>-1</sup>) 2976, 2936, 2877, 1491, 1460, 1372, 1346, 1313, 1264, 1214, 1166, 1138, 1098, 1043, 1013, 965, 858, 823, 757, 704, 672, 580.

4-(2-(4,4,5,5-Tetramethyl-1,3,2-dioxaborolan-2-yl)butan-2-yl)phenyl trifluoromethanesulfonate (**3k**)

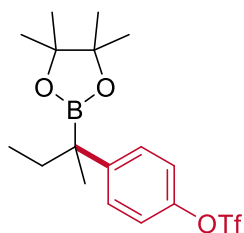

Following **GP1**, using **1k** (70.4 mg, 0.2 mmol) and *s*-butyllithium (1.4 M in hexane, 0.16 mL, 0.22 mmol), flash chromatography eluting with pentane/DCM (3:1) afforded **3k** as yellow sticky oil (44.7 mg, 55% yield).  $R_f$  0.4 (pentane/DCM = 5:2). <sup>1</sup>H NMR (300 MHz, CDCl<sub>3</sub>)  $\delta$  7.43 – 7.34 (m, 2H), 7.22 – 7.12 (m, 2H), 1.92 – 1.77 (m, 1H), 1.77 – 1.63 (m, 1H), 1.32 (s, 3H), 1.20 (s, 12H), 0.81 (t,  $J$  = 7.4 Hz, 3H). <sup>13</sup>C NMR (75 MHz, CDCl<sub>3</sub>)  $\delta$  148.0, 147.2, 128.7, 120.6, 118.7 (q,  $J$  = 320.7 Hz), 83.5, 32.0, 24.5, 24.5, 21.0, 9.9, *carbon attached to boron not observed*. <sup>19</sup>F NMR (282 MHz, CDCl<sub>3</sub>)  $\delta$  -73.0. <sup>11</sup>B NMR (96 MHz, CDCl<sub>3</sub>)  $\delta$  34.3. **HRMS** (ESI)  $m/z$  = 431.1282 calcd. for C<sub>17</sub>H<sub>24</sub>O<sub>5</sub>SBF<sub>3</sub>Na<sup>+</sup> [M+Na]<sup>+</sup>, found: 431.1291. **FTIR** (neat):  $\nu$  (cm<sup>-1</sup>) 2979, 2935, 1501, 1424, 1381, 1350, 1319, 1250, 1210, 1140, 1016, 889, 607. According to GC analysis with *n*-C<sub>14</sub>H<sub>30</sub> as internal standard, GC yield of **3k** was 56% and recovered yield of **1k** was 24%.

4,4,5,5-Tetramethyl-2-(2-(4-(trifluoromethoxy)phenyl)butan-2-yl)-1,3,2-dioxaborolane (**3l**)

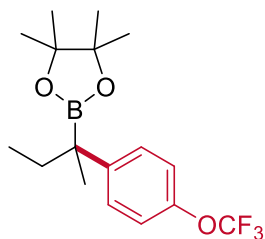

Following **GP1**, using **1l** (57.6 mg, 0.2 mmol) and *s*-butyllithium (1.4 M in hexane, 0.16 mL, 0.22 mmol), flash chromatography eluting with pentane/DCM (4:1) afforded **3l** as yellow sticky oil (45.3 mg, 66% yield).  $R_f$  0.4 (pentane/DCM = 3:1). <sup>1</sup>H NMR (300 MHz, CDCl<sub>3</sub>)  $\delta$  7.37 – 7.29 (m, 2H), 7.16 – 7.06 (m, 2H), 1.94 – 1.77 (m, 1H), 1.77 – 1.61 (m, 1H), 1.32 (s, 3H), 1.21 (s, 6H), 1.21 (s, 6H), 0.82 (t,  $J$  = 7.4 Hz, 3H). <sup>13</sup>C NMR (75 MHz, CDCl<sub>3</sub>)  $\delta$  146.8 (q,  $J$  = 1.7 Hz), 146.1, 128.2, 120.6 (q,  $J$  = 256.3 Hz), 120.3, 83.5, 32.0, 24.6, 24.6, 21.1, 9.9, *carbon attached to boron not observed*. <sup>19</sup>F NMR (282 MHz, CDCl<sub>3</sub>)  $\delta$  -57.9. <sup>11</sup>B NMR (96 MHz, CDCl<sub>3</sub>)  $\delta$  34.3. **HRMS** (ESI)  $m/z$  = 367.1663 calcd. for C<sub>17</sub>H<sub>24</sub>BF<sub>3</sub>O<sub>3</sub>Na<sup>+</sup> [M+Na]<sup>+</sup>, found: 367.1696. **FTIR**



(neat):  $\nu$  ( $\text{cm}^{-1}$ ) 2979, 2937, 1510, 1350, 1318, 1260, 1222, 1168, 1142, 1020, 965, 860, 662.

4,4,5,5-Tetramethyl-2-(2-(4-(trifluoromethyl)phenyl)butan-2-yl)-1,3,2-dioxaborolane (**3m**)

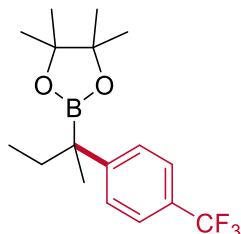

Following **GP1**, using **1m** (54.4 mg, 0.2 mmol) and *s*-butyllithium (1.4 M in hexane, 0.16 mL, 0.22 mmol), flash chromatography eluting with pentane/DCM (4:1) afforded **3m** as yellow sticky oil (43.2 mg, 66% yield).  $R_f$  0.4 (pentane/DCM = 3:1).  $^1\text{H}$  NMR (300 MHz,  $\text{CDCl}_3$ )  $\delta$  7.53 (d,  $J$  = 8.4 Hz, 2H), 7.42 (d,  $J$  = 8.4 Hz, 2H), 1.95 – 1.81 (m, 1H), 1.80 – 1.66 (m, 1H), 1.34 (s, 3H), 1.21 (s, 6H), 1.21 (s, 6H), 0.82 (t,  $J$  = 7.4 Hz, 3H).  $^{13}\text{C}$  NMR (75 MHz,  $\text{CDCl}_3$ )  $\delta$  151.7, 127.3, 127.2 (q,  $J$  = 32.2 Hz), 124.8 (q,  $J$  = 3.8 Hz), 124.6 (q,  $J$  = 271.5 Hz), 83.5, 31.8, 24.6, 24.6, 20.8, 9.8, *carbon attached to boron not observed*.  $^{19}\text{F}$  NMR (282 MHz,  $\text{CDCl}_3$ )  $\delta$  -62.2.  $^{11}\text{B}$  NMR (96 MHz,  $\text{CDCl}_3$ )  $\delta$  34.1. **HRMS** (ESI)  $m/z$  = 351.1714 calcd. for  $\text{C}_{17}\text{H}_{24}\text{O}_2\text{BF}_3\text{Na}^+$   $[\text{M}+\text{Na}]^+$ , found: 351.1729. **FTIR** (neat):  $\nu$  ( $\text{cm}^{-1}$ ) 2978, 2938, 2878, 1618, 1460, 1373, 1349, 1324, 1265, 1164, 1139, 1121, 1099, 1069, 1016, 965, 860, 835, 687.

2-(2-(3-Chloro-4-fluorophenyl)butan-2-yl)-4,4,5,5-tetramethyl-1,3,2-dioxaborolane (**3n**)

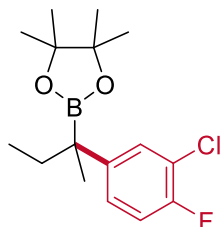

Following **GP1**, using **1n** (51.2 mg, 0.2 mmol) and *s*-butyllithium (1.4 M in hexane, 0.16 mL, 0.22 mmol), flash chromatography eluting with pentane/DCM (4:1) afforded **3n** as yellow sticky oil (35.6 mg, 57% yield).  $R_f$  0.4 (pentane/DCM = 3:1).  $^1\text{H}$  NMR (300 MHz,  $\text{CDCl}_3$ )  $\delta$  7.25 (dd,  $J$  = 7.2, 2.3 Hz, 1H), 7.13 – 7.05 (m, 1H), 6.96 (t,  $J$  = 8.8 Hz, 1H), 1.83 – 1.66 (m, 1H), 1.66 – 1.51 (m, 1H), 1.21 (s, 3H), 1.13 (s, 12H), 0.73 (t,  $J$  = 7.4 Hz, 3H).  $^{13}\text{C}$  NMR (75 MHz,  $\text{CDCl}_3$ )  $\delta$  155.9 (d,  $J$  = 245.7 Hz), 144.4 (d,  $J$  = 3.7 Hz), 128.9, 126.7 (d,  $J$  = 6.7 Hz), 120.1 (d,  $J$  = 17.2 Hz), 115.8 (d,  $J$  = 20.5 Hz), 83.5, 32.0, 24.6, 24.5, 20.9, 9.8, *carbon attached to boron not observed*.  $^{19}\text{F}$  NMR (282 MHz,  $\text{CDCl}_3$ )  $\delta$  -121.4 (s).  $^{11}\text{B}$  NMR (96 MHz,  $\text{CDCl}_3$ )  $\delta$  33.8. **HRMS** (ESI)  $m/z$  = 335.1356 calcd. for  $\text{C}_{16}\text{H}_{23}\text{BClFO}_2\text{Na}^+$   $[\text{M}+\text{Na}]^+$ , found: 335.1353. **FTIR** (neat):  $\nu$  ( $\text{cm}^{-1}$ ) 2976, 2935, 2878, 1499, 1460, 1348, 1315, 1265, 1246, 1214, 1138, 1099, 1059, 965, 871, 852, 820, 743, 713, 674, 609, 580.



2-(2-(3-methoxyphenyl)butan-2-yl)-4,4,5,5-tetramethyl-1,3,2-dioxaborolane (**3o**)

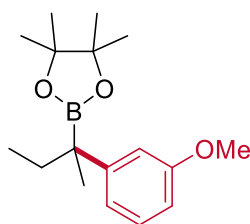

Following **GP1**, using **1o** (46.8 mg, 0.2 mmol) and *s*-butyllithium (1.4 M in hexane, 0.16 mL, 0.22 mmol), flash chromatography eluting with pentane/DCM (1:1) afforded **3o** as yellow sticky oil (27.6 mg, 48% yield).  $R_f$  0.3 (pentane/DCM = 1:1).  $^1\text{H}$  NMR (300 MHz,  $\text{CDCl}_3$ )  $\delta$  7.19 (t,  $J = 7.9$  Hz, 1H), 6.94 – 6.86 (m, 2H), 6.68 (dd,  $J = 7.9$ , 2.0 Hz, 1H), 3.79 (s, 3H) 1.95 – 1.78 (m, 1H), 1.77 – 1.62 (m, 1H), 1.31 (s, 3H), 1.22 (s, 6H), 1.21 (s, 6H), 0.83 (t,  $J = 7.4$  Hz, 3H).  $^{13}\text{C}$  NMR (75 MHz,  $\text{CDCl}_3$ )  $\delta$  159.4, 149.2, 128.8, 119.5, 113.1, 110.1, 83.3, 55.0, 31.9, 24.6, 24.6, 21.0, 10.0, *carbon attached to boron not observed*.  $^{11}\text{B}$  NMR (96 MHz,  $\text{CDCl}_3$ )  $\delta$  34.2. **HRMS** (ESI)  $m/z$  = 313.1945 calcd. for  $\text{C}_{17}\text{H}_{27}\text{O}_3\text{BNa}^+$   $[\text{M}+\text{Na}]^+$ , found: 313.1960. **FTIR** (neat):  $\nu$  ( $\text{cm}^{-1}$ ) 2977, 2935, 2877, 2836, 1599, 1581, 1486, 1461, 1372, 1347, 1311, 1289, 1253, 1215, 1166, 1139, 1041, 965, 852, 776, 704, 681.

2-(2-(3-Fluorophenyl)butan-2-yl)-4,4,5,5-tetramethyl-1,3,2-dioxaborolane (**3p**)

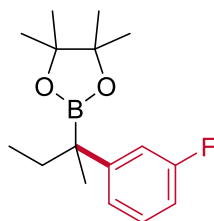

Following **GP1**, using **1p** (44.4 mg, 0.2 mmol) and *s*-butyllithium (1.4 M in hexane, 0.16 mL, 0.22 mmol), flash chromatography eluting with pentane/DCM (5:1) afforded **3p** as yellow sticky oil (25.5 mg, 46% yield).  $R_f$  0.3 (pentane/DCM = 4:1).  $^1\text{H}$  NMR (300 MHz,  $\text{CDCl}_3$ )  $\delta$  7.20 – 7.09 (m, 1H), 7.04 – 6.91 (m, 2H), 6.79 – 6.69 (m, 1H), 1.84 – 1.70 (m, 1H), 1.70 – 1.55 (m, 1H), 1.23 (s, 3H), 1.14 (s, 6H), 1.13 (s, 6H), 0.74 (t,  $J = 7.4$  Hz, 3H).  $^{13}\text{C}$  NMR (75 MHz,  $\text{CDCl}_3$ )  $\delta$  163.0 (d,  $J = 243.7$  Hz), 150.3 (d,  $J = 6.7$  Hz), 129.1 (d,  $J = 8.4$  Hz), 122.7 (d,  $J = 2.6$  Hz), 113.9 (d,  $J = 21.5$  Hz), 111.7 (d,  $J = 21.1$  Hz), 83.4, 31.8, 24.6, 24.6, 20.8, 9.8, *carbon attached to boron not observed*.  $^{19}\text{F}$  NMR (282 MHz,  $\text{CDCl}_3$ )  $\delta$  -114.1 (s).  $^{11}\text{B}$  NMR (96 MHz,  $\text{CDCl}_3$ )  $\delta$  33.8. **HRMS** (ESI)  $m/z$  = 301.1746 calcd. for  $\text{C}_{16}\text{H}_{24}\text{BF}_2\text{Na}^+$   $[\text{M}+\text{Na}]^+$ , found: 301.1755. **FTIR** (neat):  $\nu$  ( $\text{cm}^{-1}$ ) 2978, 2933, 2878, 1612, 1583, 1486, 1460, 1372, 1349, 1314, 1266, 1242, 1215, 1164, 1139, 1120, 1100, 1042, 965, 914, 865, 851, 780, 702, 677, 586.

2-(2-(3-Chlorophenyl)butan-2-yl)-4,4,5,5-tetramethyl-1,3,2-dioxaborolane (**3q**)

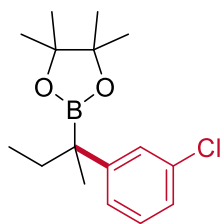

Following **GP1**, using **1q** (47.6 mg, 0.2 mmol) and *s*-butyllithium (1.4 M in hexane, 0.16 mL, 0.22 mmol), flash chromatography eluting with pentane/DCM (5:1) afforded **3q** as light yellow sticky oil (31.2 mg, 53% yield).  $R_f$  0.4 (pentane/DCM = 4:1).  $^1\text{H}$  NMR (300 MHz,  $\text{CDCl}_3$ )  $\delta$  7.25 – 7.20 (m, 1H), 7.15 – 7.09 (m, 2H), 7.07 – 6.99 (m, 1H), 1.84 – 1.69 (m, 1H), 1.69 – 1.54 (m, 1H), 1.23 (s, 3H), 1.14 (s, 6H), 1.14 (s, 6H), 0.74 (t,  $J$  = 7.4 Hz, 3H).  $^{13}\text{C}$  NMR (75 MHz,  $\text{CDCl}_3$ )  $\delta$  149.6, 133.9, 129.1, 127.1, 125.3, 125.1, 83.4, 31.8, 24.6, 24.5, 20.8, 9.9, *carbon attached to boron not observed*.  $^{11}\text{B}$  NMR (96 MHz,  $\text{CDCl}_3$ )  $\delta$  33.7. **HRMS** (ESI)  $m/z$  = 317.1450 calcd. for  $\text{C}_{16}\text{H}_{24}\text{BClO}_2\text{Na}^+ [\text{M}+\text{Na}]^+$ , found: 317.1454. **FTIR** (neat):  $\nu$  ( $\text{cm}^{-1}$ ) 2976, 2935, 2876, 1593, 1567, 1460, 1372, 1348, 1314, 1263, 1214, 1167, 1138, 1107, 1043, 965, 874, 849, 781, 700, 668.

4,4,5,5-Tetramethyl-2-(2-(3-(trifluoromethyl)phenyl)butan-2-yl)-1,3,2-dioxaborolane (**3r**)

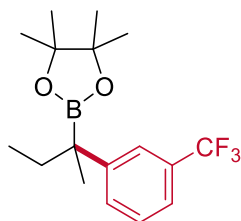

Following **GP1**, using **1r** (54.4 mg, 0.2 mmol) and *s*-butyllithium (1.4 M in hexane, 0.16 mL, 0.22 mmol), flash chromatography eluting with pentane/DCM (4:1) afforded **3r** as light yellow sticky oil (41.9 mg, 64% yield).  $R_f$  0.5 (pentane/DCM = 3:1).  $^1\text{H}$  NMR (300 MHz,  $\text{CDCl}_3$ )  $\delta$  7.59 (s, 1H), 7.54 – 7.46 (m, 1H), 7.43 – 7.35 (m, 2H), 1.96 – 1.81 (m, 1H), 1.80 – 1.64 (m, 1H), 1.35 (s, 3H), 1.22 (s, 12H), 0.83 (t,  $J$  = 7.4 Hz, 3H).  $^{13}\text{C}$  NMR (75 MHz,  $\text{CDCl}_3$ )  $\delta$  148.4, 130.4 – 130.2 (m), 130.2 (q,  $J$  = 31.6 Hz), 128.3, 124.5 (d,  $J$  = 272.3 Hz), 123.9 (q,  $J$  = 3.8 Hz), 121.9 (q,  $J$  = 3.8 Hz), 83.5, 31.9, 24.6, 24.5, 20.9, 9.9, *carbon attached to boron not observed*.  $^{19}\text{F}$  NMR (282 MHz,  $\text{CDCl}_3$ )  $\delta$  -62.5 (s).  $^{11}\text{B}$  NMR (96 MHz,  $\text{CDCl}_3$ )  $\delta$  34.1. **HRMS** (ESI)  $m/z$  = 351.1714 calcd. for  $\text{C}_{17}\text{H}_{24}\text{BF}_3\text{O}_2\text{Na}^+ [\text{M}+\text{Na}]^+$ , found: 351.1727. **FTIR** (neat):  $\nu$  ( $\text{cm}^{-1}$ ) 2978, 2937, 2877, 1461, 1350, 1326, 1265, 1164, 1123, 1076, 965, 851, 803, 704.

3-(2-(4,4,5,5-Tetramethyl-1,3,2-dioxaborolan-2-yl)butan-2-yl)phenyl trifluoromethanesulfonate (**3s**)

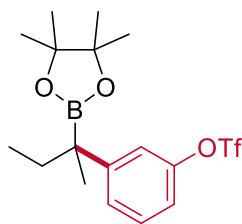

Following **GP1**, using **1s** (70.4 mg, 0.2 mmol) and *s*-butyllithium (1.4 M in hexane, 0.16 mL, 0.22 mmol), flash chromatography eluting with pentane/DCM (3:1) afforded **3s** as yellow sticky oil (48.1 mg, 59% yield).  $R_f$  0.4 (pentane/DCM = 2:1).  $^1\text{H}$  NMR (300 MHz,  $\text{CDCl}_3$ )  $\delta$  7.29 – 7.23 (m, 2H), 7.18 (s, 1H), 7.02 – 6.92 (m, 1H), 1.84 – 1.70 (m, 1H), 1.70 – 1.55 (m, 1H), 1.25 (s, 3H), 1.14 (s, 6H), 1.13 (s, 6H), 0.73 (t,  $J$  = 7.4 Hz, 3H).  $^{13}\text{C}$  NMR (75 MHz,  $\text{CDCl}_3$ )  $\delta$  150.8, 149.7, 129.5, 126.8, 120.2, 118.8 (q,  $J$  = 320.8 Hz), 117.7, 83.6, 32.0, 24.6, 24.5, 20.8, 9.8, *carbon attached to boron not observed*.  $^{19}\text{F}$  NMR (282 MHz,  $\text{CDCl}_3$ )  $\delta$  -73.0 (s).  $^{11}\text{B}$  NMR (96 MHz,  $\text{CDCl}_3$ )  $\delta$  33.8. **HRMS** (ESI)  $m/z$  = 431.1282 calcd. for  $\text{C}_{17}\text{H}_{24}\text{BF}_3\text{O}_5\text{SNa}^+$   $[\text{M}+\text{Na}]^+$ , found: 431.1299. **FTIR** (neat):  $\nu$  ( $\text{cm}^{-1}$ ) 2978, 2936, 2878, 1611, 1575, 1423, 1381, 1351, 1319, 1250, 1212, 1141, 926, 848, 799, 607. According to GC analysis with *n*- $\text{C}_{14}\text{H}_{30}$  as internal standard, GC yield of **3s** was 60% and recovered yield of **1s** was 24%.

#### 2-(2-(2-Fluorophenyl)butan-2-yl)-4,4,5,5-tetramethyl-1,3,2-dioxaborolane (**3t**)

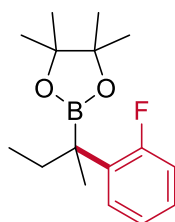

Following **GP1**, using **1t** (44.4 mg, 0.2 mmol) and *s*-butyllithium (1.4 M in hexane, 0.16 mL, 0.22 mmol), flash chromatography eluting with pentane/DCM (5:1) afforded **3t** as yellow sticky oil (21.0 mg, 38% yield).  $R_f$  0.3 (pentane/DCM = 3:1).  $^1\text{H}$  NMR (300 MHz,  $\text{CDCl}_3$ )  $\delta$  7.22 – 7.12 (m, 1H), 7.11 – 6.96 (m, 2H), 6.94 – 6.84 (m, 1H), 1.84 – 1.57 (m, 2H), 1.21 (s, 3H), 1.18 (s, 12H), 0.70 (t,  $J$  = 7.5 Hz, 3H).  $^{13}\text{C}$  NMR (75 MHz,  $\text{CDCl}_3$ )  $\delta$  161.1 (d,  $J$  = 242.9 Hz), 134.6 (d,  $J$  = 14.4 Hz), 127.5 (d,  $J$  = 5.5 Hz), 126.7 (d,  $J$  = 8.6 Hz), 123.9 (d,  $J$  = 3.2 Hz), 114.8 (d,  $J$  = 23.2 Hz), 83.3, 29.7, 24.6, 20.7, 9.2, *carbon attached to boron not observed*.  $^{19}\text{F}$  NMR (282 MHz,  $\text{CDCl}_3$ )  $\delta$  -112.4 (s).  $^{11}\text{B}$  NMR (96 MHz,  $\text{CDCl}_3$ )  $\delta$  34.1. **HRMS** (ESI)  $m/z$  = 301.1746 calcd. for  $\text{C}_{16}\text{H}_{24}\text{BFO}_2\text{Na}^+$   $[\text{M}+\text{Na}]^+$ , found: 301.1755. **FTIR** (neat):  $\nu$  ( $\text{cm}^{-1}$ ) 2977, 2929, 2876, 1487, 1462, 1447, 1380, 1351, 1317, 1266, 1218, 1198, 1142, 1114, 1101, 1032, 965, 870, 848, 808, 753, 684. According to GC analysis with *n*- $\text{C}_{14}\text{H}_{30}$  as internal standard, GC yield of **3t** was 39% and recovered yield of **1t** was 23%.

#### 2-(2-(trifluoromethyl)phenyl)propan-2-ol (**3u-1**)

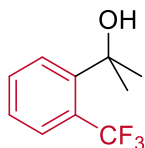

Following **GP1**, using **1u** (54.4 mg, 0.2 mmol) and isopropyllithium (0.7 M in hexane, 0.31 mL, 0.22 mmol) afford the crude alkylboronic ester **3u**. According to crude GC analysis with *n*-C<sub>14</sub>H<sub>30</sub> as internal standard, recovered yield of **1u** was 12%. After oxidation workup with H<sub>2</sub>O<sub>2</sub>/NaOH,<sup>S17</sup> flash chromatography eluting with pentane/diethylether (3:1) afforded **3u-1** as light yellow liquid (22.2 mg, 54% yield). R<sub>f</sub> 0.4 (pentane/Et<sub>2</sub>O = 3:1). <sup>1</sup>H NMR (300 MHz, CDCl<sub>3</sub>) δ 7.68 (m, 1H), 7.59 – 7.51 (m, 1H), 7.47 – 7.37 (m, 1H), 7.27 (m, 1H), 1.87 (s, 1H), 1.62 (s, 6H). <sup>13</sup>C NMR (75 MHz, CDCl<sub>3</sub>) δ 148.1, 131.6, 128.0, 127.9 (q, *J* = 7.2 Hz), 127.0 (q, *J* = 30.8 Hz), 126.9, 124.9 (q, *J* = 271.4 Hz), 73.6, 32.5 (q, *J* = 2.4 Hz). <sup>19</sup>F NMR (282 MHz, CDCl<sub>3</sub>) δ -54.2.

Following **GP3**, using **1u** (54.4 mg, 0.2 mmol) and isopropyllithium (0.7 M in hexane, 0.31 mL, 0.22 mmol) afford the crude alkylboronic ester **3u**. According to crude GC analysis with *n*-C<sub>14</sub>H<sub>30</sub> as internal standard, recovered yield of **1u** was 8%. After oxidation workup with H<sub>2</sub>O<sub>2</sub>/NaOH,<sup>S17</sup> flash chromatography eluting with pentane/diethylether (3:1) afforded **3u-1** as colorless liquid (20.5 mg, 50% yield). R<sub>f</sub> 0.4 (pentane/Et<sub>2</sub>O = 3:1). <sup>1</sup>H NMR (300 MHz, CDCl<sub>3</sub>) δ 7.68 (m, 1H), 7.59 – 7.51 (m, 1H), 7.47 – 7.37 (m, 1H), 7.27 (m, 1H), 1.87 (s, 1H), 1.62 (s, 6H). <sup>13</sup>C NMR (75 MHz, CDCl<sub>3</sub>) δ 148.1, 131.6, 128.0, 127.9 (q, *J* = 7.2 Hz), 127.0 (q, *J* = 30.8 Hz), 126.9, 124.9 (q, *J* = 271.4 Hz), 73.6, 32.5 (q, *J* = 2.4 Hz). <sup>19</sup>F NMR (282 MHz, CDCl<sub>3</sub>) δ -54.2.

2-(2-(3,5-Dichlorophenyl)butan-2-yl)-4,4,5,5-tetramethyl-1,3,2-dioxaborolane (**3v**)

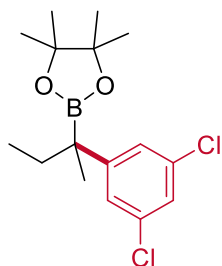

Following **GP1**, using **1v** (54.6 mg, 0.2 mmol) and *s*-butyllithium (1.4 M in hexane, 0.16 mL, 0.22 mmol), flash chromatography eluting with pentane/DCM (5:1) afforded **3v** as light yellow sticky oil (31.8 mg, 48% yield). R<sub>f</sub> 0.5 (pentane/DCM = 4:1). <sup>1</sup>H NMR (300 MHz, CDCl<sub>3</sub>) δ 7.19 (d, *J* = 1.8 Hz, 2H), 7.13 (t, *J* = 1.8 Hz, 1H), 1.91 – 1.74 (m, 1H), 1.75 – 1.61 (m, 1H), 1.28 (s, 3H), 1.21 (s, 12H), 0.81 (t, *J* = 7.4 Hz, 3H). <sup>13</sup>C NMR (75 MHz, CDCl<sub>3</sub>) δ 151.2, 134.5, 125.7, 125.2, 83.7, 31.7, 24.6, 24.5, 20.6, 9.8, carbon attached to boron not observed. <sup>11</sup>B NMR (96 MHz, CDCl<sub>3</sub>) δ 33.5. **HRMS** (EI) *m/z* = 328.1163 calcd. for C<sub>16</sub>H<sub>23</sub>BCl<sub>2</sub>O<sub>2</sub><sup>+</sup> [M]<sup>+</sup>, found: 328.1162. **FTIR** (neat): ν (cm<sup>-1</sup>) 2977, 2938, 2883, 1586, 1561, 1459, 1415, 1381, 1347, 1319, 1139, 852, 798, 692.

Following **GP3**, using **1v** (54.6 mg, 0.2 mmol) and *s*-butyllithium (1.4 M in hexane, 0.16 mL, 0.22 mmol), flash chromatography eluting with pentane/DCM (5:1) afforded **3v** as colorless sticky oil (33.7 mg, 51% yield).  $R_f$  0.5 (pentane/DCM = 4:1).  $^1\text{H}$  NMR (300 MHz,  $\text{CDCl}_3$ )  $\delta$  7.19 (d,  $J$  = 1.8 Hz, 2H), 7.13 (t,  $J$  = 1.8 Hz, 1H), 1.91 – 1.74 (m, 1H), 1.75 – 1.61 (m, 1H), 1.28 (s, 3H), 1.21 (s, 12H), 0.81 (t,  $J$  = 7.4 Hz, 3H).  $^{13}\text{C}$  NMR (75 MHz,  $\text{CDCl}_3$ )  $\delta$  151.2, 134.5, 125.7, 125.2, 83.7, 31.7, 24.6, 24.5, 20.6, 9.8, *carbon attached to boron not observed*.  $^{11}\text{B}$  NMR (96 MHz,  $\text{CDCl}_3$ )  $\delta$  33.5. **HRMS** (EI)  $m/z$  = 328.1163 calcd. for  $\text{C}_{16}\text{H}_{23}\text{BCl}_2\text{O}_2^+$   $[\text{M}]^+$ , found: 328.1162. **FTIR** (neat):  $\nu$  ( $\text{cm}^{-1}$ ) 2977, 2938, 2883, 1586, 1561, 1459, 1415, 1381, 1347, 1319, 1139, 852, 798, 692. According to crude GC analysis with *n*- $\text{C}_{14}\text{H}_{30}$  as internal standard, crude yield of **3v** was 51% and recovered yield of **1v** was 16%.

4,4,5,5-Tetramethyl-2-(1-phenylcyclobutyl)-1,3,2-dioxaborolane (**3w**)

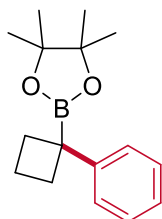

Following **GP1**, using cyclobutylboronic acid pinacol ester (36.4 mg, 0.2 mmol) and phenyllithium (1.9 M in dibutylether, 0.12 mL, 0.22 mmol), flash chromatography eluting with pentane/DCM (5:1) afforded **3w** as yellow sticky oil (22.0 mg, 43% yield).  $R_f$  0.4 (pentane/DCM = 3:1).  $^1\text{H}$  NMR (300 MHz,  $\text{CDCl}_3$ )  $\delta$  7.23 – 7.13 (m, 2H), 7.10 – 6.96 (m, 3H), 2.55 – 2.39 (m, 2H), 2.29 – 2.12 (m, 2H), 2.06 – 1.86 (m, 1H), 1.84 – 1.68 (m, 1H), 1.11 (s, 12H).  $^{13}\text{C}$  NMR (75 MHz,  $\text{CDCl}_3$ )  $\delta$  148.9, 127.9, 125.5, 124.4, 83.4, 32.0, 24.5, 18.8, *carbon attached to boron not observed*.  $^{11}\text{B}$  NMR (96 MHz,  $\text{CDCl}_3$ )  $\delta$  34.1. **HRMS** (ESI)  $m/z$  = 281.1683 calcd. for  $\text{C}_{16}\text{H}_{23}\text{BO}_2\text{Na}^+$   $[\text{M}+\text{Na}]^+$ , found: 281.1680. **FTIR** (neat):  $\nu$  ( $\text{cm}^{-1}$ ) 2976, 2938, 2868, 1599, 1493, 1468, 1445, 1371, 1352, 1311, 1273, 1165, 1147, 1120, 965, 867, 842, 769, 736, 699.

4,4,5,5-Tetramethyl-2-(1-phenylcyclopentyl)-1,3,2-dioxaborolane (**3x**)

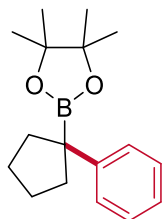

Following **GP1**, using cyclopentylboronic acid pinacol ester (39.2 mg, 0.2 mmol) and phenyllithium (1.9 M in dibutylether, 0.12 mL, 0.22 mmol), flash chromatography eluting with pentane/DCM (4:1) afforded **3x** as yellow sticky oil (22.0 mg, 40% yield).  $R_f$  0.3 (pentane/DCM = 3:1).  $^1\text{H}$  NMR (300 MHz,  $\text{CDCl}_3$ )  $\delta$  7.25 – 7.11 (m, 4H), 7.10 – 6.97 (m, 1H), 2.38 – 2.06 (m, 2H), 1.75 – 1.42 (m, 6H), 1.06 (s, 12H).  $^{13}\text{C}$  NMR (75 MHz,  $\text{CDCl}_3$ )  $\delta$  147.2, 127.9, 127.0, 124.7, 83.3, 35.2, 24.6, 24.4, *carbon attached to*

boron not observed.  $^{11}\text{B}$  NMR (96 MHz,  $\text{CDCl}_3$ )  $\delta$  34.2. **HRMS** (ESI)  $m/z$  = 295.1840 calcd. for  $\text{C}_{17}\text{H}_{25}\text{BO}_2\text{Na}^+ [\text{M}+\text{Na}]^+$ , found: 295.1853. **FTIR** (neat):  $\nu$  ( $\text{cm}^{-1}$ ) 2979, 2960, 2870, 1351, 1309, 1265, 1141, 853, 735, 700, 617. According to crude GC analysis with  $n\text{-C}_{14}\text{H}_{30}$  as internal standard, crude yield of **3x** was 43% and recovered yield of phenylboronic acid pinacol ester was 16%.

Following **GP3**, using cyclopentylboronic acid pinacol ester (39.2 mg, 0.2 mmol) and phenyllithium (1.9 M in dibutylether, 0.12 mL, 0.22 mmol), flash chromatography eluting with pentane/DCM (4:1) afforded **3x** as yellow sticky oil (25.0 mg, 46% yield).  $R_f$  0.3 (pentane/DCM = 3:1).  $^1\text{H}$  NMR (300 MHz,  $\text{CDCl}_3$ )  $\delta$  7.25 – 7.11 (m, 4H), 7.10 – 6.97 (m, 1H), 2.38 – 2.06 (m, 2H), 1.75 – 1.42 (m, 6H), 1.06 (s, 12H).  $^{13}\text{C}$  NMR (75 MHz,  $\text{CDCl}_3$ )  $\delta$  147.2, 127.9, 127.0, 124.7, 83.3, 35.2, 24.6, 24.4, carbon attached to boron not observed.  $^{11}\text{B}$  NMR (96 MHz,  $\text{CDCl}_3$ )  $\delta$  34.2. **HRMS** (ESI)  $m/z$  = 295.1840 calcd. for  $\text{C}_{17}\text{H}_{25}\text{BO}_2\text{Na}^+ [\text{M}+\text{Na}]^+$ , found: 295.1853. **FTIR** (neat):  $\nu$  ( $\text{cm}^{-1}$ ) 2979, 2960, 2870, 1351, 1309, 1265, 1141, 853, 735, 700, 617. According to crude GC analysis with  $n\text{-C}_{14}\text{H}_{30}$  as internal standard, crude yield of **3x** was 47% and recovered yield of phenylboronic acid pinacol ester was 10%.

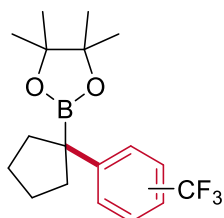

trifluoromethylated **3x**

About 10% trifluoromethylated **3x** (o/p = 1:1.2) was also detected by crude GC and GC/MS.

4,4,5,5-Tetramethyl-2-(1-(4-(2-methyl-1,3-dioxolan-2-yl)phenyl)cyclopentyl)-1,3,2-dioxaborolane (**3y**)

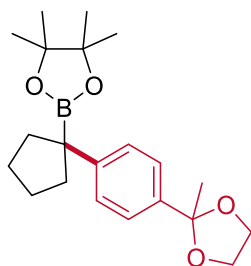

Following **GP1**, using **1y** (58.0 mg, 0.2 mmol) and cyclopentylolithium (0.55 M in hexane, 0.40 mL, 0.22 mmol), flash chromatography eluting with DCM (4:1) afforded **3y** as light yellow solid (30.0 mg, 42% yield).  $R_f$  0.2 (DCM). m.p = 87-89 °C.  $^1\text{H}$  NMR (300 MHz,  $\text{CDCl}_3$ )  $\delta$  7.27 – 7.19 (m, 2H), 7.17 – 7.08 (m, 2H), 3.98 – 3.82 (m, 2H), 3.75 – 3.58 (m, 2H), 2.35 – 2.05 (m, 2H), 1.67 – 1.46 (m, 9H), 1.03 (s, 12H).  $^{13}\text{C}$  NMR (75 MHz,  $\text{CDCl}_3$ )  $\delta$  146.8, 139.5, 126.7, 124.8, 109.0, 83.3, 64.4, 35.3, 27.5, 24.6, 24.4, carbon attached to boron not observed.  $^{11}\text{B}$  NMR (96 MHz,  $\text{CDCl}_3$ )  $\delta$  34.2. **HRMS** (ESI)  $m/z$  = 381.2208 calcd. for  $\text{C}_{21}\text{H}_{31}\text{BO}_2\text{Na}^+ [\text{M}+\text{Na}]^+$ , found: 381.2217.

**FTIR** (neat):  $\nu$  (cm<sup>-1</sup>) 2978, 2952, 2868, 1610, 1508, 1372, 1353, 1314, 1258, 1198, 1167, 1142, 1041, 1019, 949, 870, 856, 833.

4,4,5,5-Tetramethyl-2-(2-((8R,9S,13S,14S)-13-methyl-6,7,8,9,11,12,13,14,15,16-decahydrospiro[cyclopenta[a]phenanthrene-17,2'-[1,3]dioxolan]-3-yl)propan-2-yl)-1,3,2-dioxaborolane (**3z**)

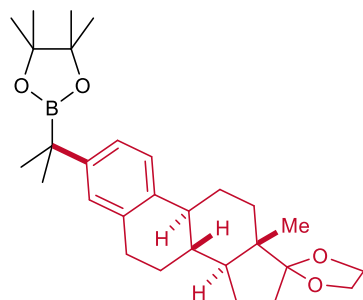

Following **GP1**, using **1z** (84.8 mg, 0.2 mmol) and isopropyllithium (0.7 M in pentane, 0.31 mL, 0.22 mmol), flash chromatography eluting with DCM afforded **3z** as light yellow solid (38.2 mg, 41% yield).  $R_f$  0.1 (DCM). M.p.: 66-68 °C.  $[\alpha]_D^{24} +27$  (c 0.5 CHCl<sub>3</sub>). <sup>1</sup>H NMR (300 MHz, CDCl<sub>3</sub>)  $\delta$  7.20 (d,  $J$  = 8.2 Hz, 1H), 7.07 (dd,  $J$  = 8.2, 1.8 Hz, 1H), 7.01 (s, 1H), 4.04 – 3.82 (m, 4H), 2.97 – 2.77 (m, 2H), 2.43 – 2.19 (m, 2H), 2.14 – 1.96 (m, 1H), 1.95 – 1.70 (m, 4H), 1.69 – 1.35 (m, 6H), 1.31 (s, 6H), 1.22 (s, 12H), 0.88 (s, 3H). <sup>13</sup>C NMR (75 MHz, CDCl<sub>3</sub>)  $\delta$  145.7, 136.9, 136.1, 126.6, 125.0, 123.8, 119.5, 83.2, 65.2, 64.6, 49.5, 46.2, 43.9, 38.9, 34.3, 30.8, 29.8, 27.1, 25.9, 25.8, 25.8, 24.5, 22.4, 14.4, *carbon attached to boron not observed*. <sup>11</sup>B NMR (96 MHz, CDCl<sub>3</sub>)  $\delta$  34.2. **HRMS** (EI)  $m/z$  = 466.3249 calcd. for C<sub>29</sub>H<sub>43</sub>BO<sub>4</sub><sup>+</sup> [M]<sup>+</sup>, found: 466.3250. **FTIR** (neat):  $\nu$  (cm<sup>-1</sup>) 2974, 2936, 2866, 1500, 1470, 1371, 1342, 1308, 1215, 1180, 1162, 1136, 1106, 1045, 965, 950, 885, 856, 835, 736.

2-(2-((R)-2,8-Dimethyl-2-((4R,8R)-4,8,12-trimethyltridecyl)chroman-6-yl)propan-2-yl)-4,4,5,5-tetramethyl-1,3,2-dioxaborolane (**3aa**)

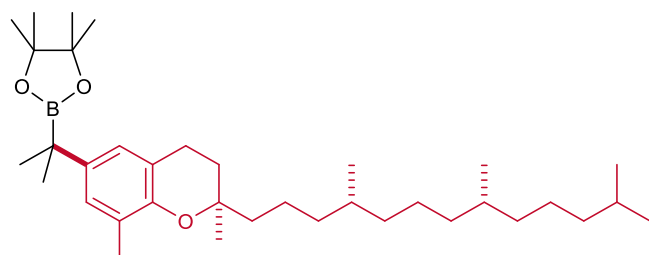

Following **GP1**, using **1aa** (102.4 mg, 0.2 mmol) and isobutyllithium (0.7 M in pentane, 0.31 mL, 0.22 mmol), flash chromatography eluting with pentane/DCM (3:1) afforded **3aa** as light yellow sticky oil (67.5 mg, 61% yield).  $R_f$  0.4 (pentane/DCM = 2:1).  $[\alpha]_D^{26} +10$  (c 0.46, CHCl<sub>3</sub>). <sup>1</sup>H NMR (300 MHz, CDCl<sub>3</sub>)  $\delta$  6.88 (d,  $J$  = 1.8 Hz, 1H), 6.80 (d,  $J$  = 1.8 Hz, 1H), 2.82 – 2.63 (m, 2H), 2.14 (s, 3H), 1.87 – 1.64 (m, 2H), 1.63 – 1.32 (m, 9H), 1.32 – 1.26 (m, 11H), 1.25 (s, 3H), 1.22 (s, 12H), 1.20 – 0.99 (m, 7H), 0.93 – 0.83 (m, 12H). <sup>13</sup>C NMR (75 MHz, CDCl<sub>3</sub>)  $\delta$  149.7, 138.5, 126.5, 125.4, 124.3, 119.7, 83.1, 40.4, 39.4, 37.5, 37.5, 37.3, 32.8, 32.7, 31.4, 28.0, 26.0, 24.8, 24.5,



24.5, 24.3, 22.7, 22.6, 22.6, 21.0, 19.8, 19.7, 16.2, *carbon attached to boron not observed*.  $^{11}\text{B}$  NMR (96 MHz,  $\text{CDCl}_3$ )  $\delta$  33.6. **HRMS** (EI)  $m/z$  = 554.4865 calcd. for  $\text{C}_{36}\text{H}_{63}\text{BO}_3^+ [\text{Ma}]^+$ , found: 554.4878. **FTIR** (neat):  $\nu$  ( $\text{cm}^{-1}$ ) 2926, 2868, 1470, 1371, 1340, 1307, 1226, 1134, 1111, 966, 929, 856, 735, 697, 675.

4,4,5,5-Tetramethyl-2-(octan-4-yl)-1,3,2-dioxaborolane (**6a**)

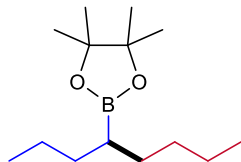

Following **GP1**, using *n*-butylboronic acid pinacol ester **4a** (36.8 mg, 0.2 mmol) and *n*-butyllithium (1.6 M in hexane, 0.14 mL, 0.22 mmol), flash chromatography eluting with pentane/DCM (5:1) afforded **6a** as light yellow liquid (23.3 mg, 49% yield).  $R_f$  0.4 (pentane/DCM = 3:1).  $^1\text{H}$  NMR (300 MHz,  $\text{CDCl}_3$ )  $\delta$  1.46 – 1.26 (m, 10H), 1.23 (s, 12H), 1.01 – 0.91 (m, 1H), 0.91 – 0.81 (m, 6H).  $^{13}\text{C}$  NMR (75 MHz,  $\text{CDCl}_3$ )  $\delta$  82.7, 33.8, 31.6, 31.1, 24.8, 23.0, 22.4, 14.4, 14.1, *carbon attached to boron not observed*.  $^{11}\text{B}$  NMR (96 MHz,  $\text{CDCl}_3$ )  $\delta$  34.3. **HRMS** (ESI)  $m/z$  = 263.2153 calcd. for  $\text{C}_{14}\text{H}_{29}\text{BO}_2\text{Na}^+ [\text{M}+\text{Na}]^+$ , found: 263.2161. **FTIR** (neat):  $\nu$  ( $\text{cm}^{-1}$ ) 2979, 2956, 2925, 2859, 1467, 1412, 1388, 1353, 1315, 1247, 1215, 1145, 967, 862, 687.

Following **GP3**, using *n*-butylboronic acid pinacol ester **4a** (36.8 mg, 0.2 mmol) and *n*-butyllithium (1.6 M in hexane, 0.14 mL, 0.22 mmol), flash chromatography eluting with pentane/DCM (5:1) afforded **6a** as colorless liquid (20.9 mg, 44% yield).  $R_f$  0.4 (pentane/DCM = 3:1).  $^1\text{H}$  NMR (300 MHz,  $\text{CDCl}_3$ )  $\delta$  1.46 – 1.26 (m, 10H), 1.23 (s, 12H), 1.01 – 0.91 (m, 1H), 0.91 – 0.81 (m, 6H).  $^{13}\text{C}$  NMR (75 MHz,  $\text{CDCl}_3$ )  $\delta$  82.7, 33.8, 31.6, 31.1, 24.8, 23.0, 22.4, 14.4, 14.1, *carbon attached to boron not observed*.  $^{11}\text{B}$  NMR (96 MHz,  $\text{CDCl}_3$ )  $\delta$  34.3. **HRMS** (ESI)  $m/z$  = 263.2153 calcd. for  $\text{C}_{14}\text{H}_{29}\text{BO}_2\text{Na}^+ [\text{M}+\text{Na}]^+$ , found: 263.2161. **FTIR** (neat):  $\nu$  ( $\text{cm}^{-1}$ ) 2979, 2956, 2925, 2859, 1467, 1412, 1388, 1353, 1315, 1247, 1215, 1145, 967, 862, 687. According to crude GC analysis with *n*- $\text{C}_{14}\text{H}_{30}$  as internal standard, crude yield of **6a** was 47% and recovered yield of *n*-butylboronic acid pinacol ester **4a** was 36%.

2-(2,3-Dimethylbutan-2-yl)-4,4,5,5-tetramethyl-1,3,2-dioxaborolane (**6b**)

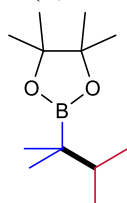

Following **GP1**, using isopropylboronic acid pinacol ester **4b** (34.0 mg, 0.2 mmol) and isopropyllithium (0.7 M in pentane, 0.31 mL, 0.22 mmol), flash chromatography eluting with pentane/DCM (5:1) afforded **6b** as light yellow liquid (30.5 mg, 72% yield).  $R_f$  0.5 (pentane/DCM = 4:1).  $^1\text{H}$  NMR (300 MHz,  $\text{CDCl}_3$ )  $\delta$  1.72 – 1.50 (m, 1H), 1.22 (s, 12H), 0.86 (s, 6H), 0.84 (d,  $J$  = 6.9 Hz, 6H).  $^{13}\text{C}$  NMR (75 MHz,  $\text{CDCl}_3$ )  $\delta$  82.7, 34.6, 24.7, 21.4, 18.4, *carbon attached to boron not observed*.  $^{11}\text{B}$  NMR (96



MHz, CDCl<sub>3</sub>)  $\delta$  34.8. **HRMS** (EI)  $m/z$  = 212.1942 calcd. for C<sub>12</sub>H<sub>25</sub>BO<sub>2</sub><sup>+</sup> [M]<sup>+</sup>, found: 212.1944. **FTIR** (neat):  $\nu$  (cm<sup>-1</sup>) 2977, 2959, 2872, 1467, 1390, 1378, 1371, 1356, 1303, 1214, 1144, 1125, 1092, 1054, 967, 861, 838, 805, 689, 669. According to crude GC analysis with *n*-C<sub>14</sub>H<sub>30</sub> as internal standard, recovered yield of isopropylboronic acid pinacol ester **4b** was 13%.

Following **GP3**, using isopropylboronic acid pinacol ester **4b** (34.0 mg, 0.2 mmol) and isopropyllithium (0.7 M in pentane, 0.31 mL, 0.22 mmol), flash chromatography eluting with pentane/DCM (5:1) afforded **6b** as light yellow liquid (32.7 mg, 77% yield). R<sub>f</sub> 0.5 (pentane/DCM = 4:1). <sup>1</sup>H NMR (300 MHz, CDCl<sub>3</sub>)  $\delta$  1.72 – 1.50 (m, 1H), 1.22 (s, 12H), 0.86 (s, 6H), 0.84 (d, *J* = 6.9 Hz, 6H). <sup>13</sup>C NMR (75 MHz, CDCl<sub>3</sub>)  $\delta$  82.7, 34.6, 24.7, 21.4, 18.4, *carbon attached to boron not observed*. <sup>11</sup>B NMR (96 MHz, CDCl<sub>3</sub>)  $\delta$  34.8. **HRMS** (EI)  $m/z$  = 212.1942 calcd. for C<sub>12</sub>H<sub>25</sub>BO<sub>2</sub><sup>+</sup> [M]<sup>+</sup>, found: 212.1944. **FTIR** (neat):  $\nu$  (cm<sup>-1</sup>) 2977, 2959, 2872, 1467, 1390, 1378, 1371, 1356, 1303, 1214, 1144, 1125, 1092, 1054, 967, 861, 838, 805, 689, 669. According to crude GC analysis with *n*-C<sub>14</sub>H<sub>30</sub> as internal standard, recovered yield of isopropylboronic acid pinacol ester **4b** was 15%.

2-(3,4-Dimethylhexan-3-yl)-4,4,5,5-tetramethyl-1,3,2-dioxaborolane (**6c**)

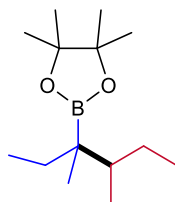

Following **GP1**, using **4c** (36.8 mg, 0.2 mmol) and isobutyllithium (1.4 M in cyclohexane, 0.16 mL, 0.22 mmol), flash chromatography eluting with pentane/DCM (4:1) afforded **6c** as light yellow liquid (26.0 mg, 54% yield, *dr* = 1:1). R<sub>f</sub> 0.4 (pentane/DCM = 3:1). *Dr* was determined by crude GCMS and GC. <sup>1</sup>H NMR (300 MHz, CDCl<sub>3</sub>)  $\delta$  1.62 – 1.26 (m, 5H), 1.24 – 1.22 (m, 12H), 0.93 – 0.71 (m, 12). <sup>13</sup>C NMR (75 MHz, CDCl<sub>3</sub>)  $\delta$  82.8, 40.8, 40.6, 30.0, 29.1, 27.5, 25.0, 25.0, 24.9, 24.9, 23.7, 16.9, 16.1, 15.7, 13.1, 13.0, 12.5, 10.4, 10.4, *carbon attached to boron not observed*. <sup>11</sup>B NMR (96 MHz, CDCl<sub>3</sub>)  $\delta$  34.8. **HRMS** (ESI)  $m/z$  = 263.2153 calcd. for C<sub>14</sub>H<sub>29</sub>BO<sub>2</sub>Na<sup>+</sup> [M+Na]<sup>+</sup>, found: 263.2155. **FTIR** (neat):  $\nu$  (cm<sup>-1</sup>) 2962, 2934, 2875, 1459, 1371, 1341, 1301, 1261, 1213, 1143, 1118, 966, 855, 684.

2-([1,1'-Bi(cyclopropan)]-1-yl)-4,4,5,5-tetramethyl-1,3,2-dioxaborolane (**6d**)

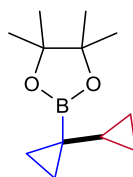

Following **GP1**, using **4d** (33.6 mg, 0.2 mmol) and cyclopropyllithium (0.85 M in Et<sub>2</sub>O, 0.26 mL, 0.22 mmol), flash chromatography eluting with pentane/DCM (2:1) afforded **6d** as light yellow liquid (12.1 mg, 29% yield). R<sub>f</sub> 0.5 (pentane/DCM = 10:7).

$^1\text{H}$  NMR (300 MHz,  $\text{CDCl}_3$ )  $\delta$  1.21 (s, 12H), 1.10 – 0.96 (m, 1H), 0.56 – 0.47 (m, 2H), 0.33 – 0.18 (m, 4H), 0.02 – -0.09 (m, 2H).  $^{13}\text{C}$  NMR (75 MHz,  $\text{CDCl}_3$ )  $\delta$  82.9, 24.7, 13.0, 8.7, 1.9, *carbon attached to boron not observed*.  $^{11}\text{B}$  NMR (96 MHz,  $\text{CDCl}_3$ )  $\delta$  33.8. **HRMS** (ESI)  $m/z$  = 231.1527 calcd. for  $\text{C}_{12}\text{H}_{21}\text{BO}_2\text{Na}^+$   $[\text{M}+\text{Na}]^+$ , found: 231.1540. **FTIR** (neat):  $\nu$  ( $\text{cm}^{-1}$ ) 3080, 2979, 1468, 1442, 1414, 1371, 1356, 1309, 1262, 1216, 1194, 1165, 1135, 1099, 1015, 967, 866, 845, 813, 706, 683, 667, 581.

Following **GP3**, using **4d** (33.6 mg, 0.2 mmol) and cyclopropyllithium (0.85 M in  $\text{Et}_2\text{O}$ , 0.26 mL, 0.22 mmol), flash chromatography eluting with pentane/DCM (2:1) afforded **6d** as light yellow liquid (14.8 mg, 35% yield).  $R_f$  0.5 (pentane/DCM = 10:7).  $^1\text{H}$  NMR (300 MHz,  $\text{CDCl}_3$ )  $\delta$  1.21 (s, 12H), 1.10 – 0.96 (m, 1H), 0.56 – 0.47 (m, 2H), 0.33 – 0.18 (m, 4H), 0.02 – -0.09 (m, 2H).  $^{13}\text{C}$  NMR (75 MHz,  $\text{CDCl}_3$ )  $\delta$  82.9, 24.7, 13.0, 8.7, 1.9, *carbon attached to boron not observed*.  $^{11}\text{B}$  NMR (96 MHz,  $\text{CDCl}_3$ )  $\delta$  33.8. **HRMS** (ESI)  $m/z$  = 231.1527 calcd. for  $\text{C}_{12}\text{H}_{21}\text{BO}_2\text{Na}^+$   $[\text{M}+\text{Na}]^+$ , found: 231.1540. **FTIR** (neat):  $\nu$  ( $\text{cm}^{-1}$ ) 3080, 2979, 1468, 1442, 1414, 1371, 1356, 1309, 1262, 1216, 1194, 1165, 1135, 1099, 1015, 967, 866, 845, 813, 706, 683, 667, 581. According to crude GC analysis with  $n\text{-C}_{14}\text{H}_{30}$  as internal standard, recovered yield of cyclopropylboronic acid pinacol ester **4d** was 16%.

2-([1,1'-Bi(cyclopentan)]-1-yl)-4,4,5,5-tetramethyl-1,3,2-dioxaborolane (**6e**)

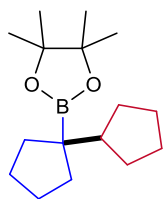

Following **GP1**, using cyclopentylboronic acid pinacol ester **4e** (39.2 mg, 0.2 mmol) and cyclopropyllithium (0.62 M in hexane, 0.355 mL, 0.22 mmol), flash chromatography eluting with pentane/DCM (5:1) afforded **6e** as colorless liquid (37.1 mg, 70% yield).  $R_f$  0.4 (pentane/DCM = 4:1).  $^1\text{H}$  NMR (300 MHz,  $\text{CDCl}_3$ )  $\delta$  1.89 – 1.73 (m, 3H), 1.72 – 1.39 (m, 10H), 1.36 – 1.24 (m, 4H), 1.21 (s, 12H).  $^{13}\text{C}$  NMR (75 MHz,  $\text{CDCl}_3$ )  $\delta$  82.7, 47.7, 33.9, 29.6, 25.7, 25.7, 24.7, *carbon attached to boron not observed*.  $^{11}\text{B}$  NMR (96 MHz,  $\text{CDCl}_3$ )  $\delta$  35.1. **HRMS** (ESI)  $m/z$  = 287.2153 calcd. for  $\text{C}_{16}\text{H}_{29}\text{BO}_2\text{Na}^+$   $[\text{M}+\text{Na}]^+$ , found: 287.2163. **FTIR** (neat):  $\nu$  ( $\text{cm}^{-1}$ ) 2977, 2948, 2866, 1452, 1370, 1337, 1299, 1268, 1196, 1141, 984, 962, 859, 671. According to crude GC analysis with  $n\text{-C}_{14}\text{H}_{30}$  as internal standard, crude yield of **6e** was 76% and recovered yield of **4e** was 20%.

Following **GP1**, using cyclopentylboronic acid pinacol ester **4e** (39.2 mg, 0.2 mmol) and cyclopropyllithium (0.62 M in hexane, 0.355 mL, 0.22 mmol), flash chromatography eluting with pentane/DCM (5:1) afforded **6e** as colorless liquid (34.4 mg, 65% yield).  $R_f$  0.4 (pentane/DCM = 4:1).  $^1\text{H}$  NMR (300 MHz,  $\text{CDCl}_3$ )  $\delta$  1.89 – 1.73 (m, 3H), 1.72 – 1.39 (m, 10H), 1.36 – 1.24 (m, 4H), 1.21 (s, 12H).  $^{13}\text{C}$  NMR (75 MHz,  $\text{CDCl}_3$ )  $\delta$  82.7, 47.7, 33.9, 29.6, 25.7, 25.7, 24.7, *carbon attached to boron not observed*.  $^{11}\text{B}$  NMR (96 MHz,  $\text{CDCl}_3$ )  $\delta$  35.1. **HRMS** (ESI)  $m/z$  = 287.2153 calcd. for

$\text{C}_{16}\text{H}_{29}\text{BO}_2\text{Na}^+ [\text{M}+\text{Na}]^+$ , found: 287.2163. **FTIR** (neat):  $\nu$  ( $\text{cm}^{-1}$ ) 2977, 2948, 2866, 1452, 1370, 1337, 1299, 1268, 1196, 1141, 984, 962, 859, 671. According to crude GC analysis with  $n\text{-C}_{14}\text{H}_{30}$  as internal standard, crude yield of **6e** was 72% and recovered yield of **4e** was 19%.

2-([1,1'-Bi(cyclohexan)]-1-yl)-4,4,5,5-tetramethyl-1,3,2-dioxaborolane (**6f**)

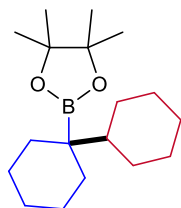

Following **GP1**, using **4f** (42.0 mg, 0.2 mmol) and cyclohexyllithium (0.53 M in hexane, 0.42 mL, 0.22 mmol), flash chromatography eluting with pentane/DCM (5:1) afforded **6f** as light yellow solid (22.3 mg, 38% yield).  $R_f$  0.5 (pentane/DCM = 3:1). M.p.: 72 – 73 °C.  $^1\text{H}$  NMR (300 MHz,  $\text{CDCl}_3$ )  $\delta$  2.01 – 1.88 (m, 2H), 1.88 – 1.77 (m, 2H), 1.75 – 1.52 (m, 6H), 1.26 (s, 12H), 1.36 – 0.83 (m, 11H).  $^{13}\text{C}$  NMR (75 MHz,  $\text{CDCl}_3$ )  $\delta$  82.9, 47.5, 32.9, 29.0, 27.4, 27.1, 26.7, 25.7, 25.0, *carbon attached to boron not observed*.  $^{11}\text{B}$  NMR (96 MHz,  $\text{CDCl}_3$ )  $\delta$  34.5. **HRMS** (ESI)  $m/z$  = 315.2466 calcd. for  $\text{C}_{18}\text{H}_{33}\text{BO}_2\text{Na}^+ [\text{M}+\text{Na}]^+$ , found: 315.2470. **FTIR** (neat):  $\nu$  ( $\text{cm}^{-1}$ ) 2978, 2918, 2849, 1447, 1409, 1388, 1370, 1334, 1301, 1263, 1232, 1213, 1162, 1141, 1110, 969, 860, 832, 710, 671, 600. According to crude GC analysis with  $n\text{-C}_{14}\text{H}_{30}$  as internal standard, crude yield of **6e** was 40% and recovered yield of **4f** was 39%.

2-(2,2-Dimethylheptan-4-yl)-4,4,5,5-tetramethyl-1,3,2-dioxaborolane (**6g**)

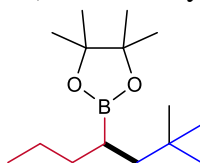

Following **GP1**, using **4g** (39.6 mg, 0.2 mmol) and  $n$ -butyllithium (1.6 M in hexane, 0.14 mL, 0.22 mmol), flash chromatography eluting with pentane/DCM (5:1) afforded **6g** as light yellow liquid (24.8 mg, 49% yield, a mixture of two regioisomers).  $R_f$  0.3 (pentane/DCM = 3:1). Regioisomeric ratio was determined to be 1.3:1 by crude GCMS and GC.  $^1\text{H}$  NMR (300 MHz,  $\text{CDCl}_3$ )  $\delta$  1.58 – 1.07 (m, 44H), 0.92 (s, 9H), 0.90 – 0.75 (m, 7H), 0.86 (s, 11.6H).  $^{13}\text{C}$  NMR (75 MHz,  $\text{CDCl}_3$ )  $\delta$  82.7, 82.7, 45.8, 35.9, 32.6, 32.0, 32.0, 31.0, 29.7, 29.6, 26.6, 25.0, 25.0, 24.9, 24.9, 23.0, 22.1, 14.4, 14.1, *carbon attached to boron not observed*.  $^{11}\text{B}$  NMR (96 MHz,  $\text{CDCl}_3$ )  $\delta$  34.3. **HRMS** (ESI)  $m/z$  = 277.2309 calcd. for  $\text{C}_{15}\text{H}_{31}\text{BO}_2\text{Na}^+ [\text{M}+\text{Na}]^+$ , found: 277.2319. **FTIR** (neat):  $\nu$  ( $\text{cm}^{-1}$ ) 2955, 2928, 2869, 1467, 1371, 1314, 1235, 1143, 1113, 864,

2-(1-Butylcyclopentyl)-4,4,5,5-tetramethyl-1,3,2-dioxaborolane (**6h**)

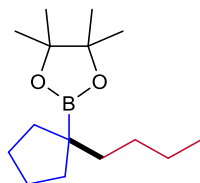

Following **GP1**, using cyclopentylboronic acid pinacol ester **4h** (39.2 mg, 0.2 mmol) and *n*-butyllithium (1.6 M in hexane, 0.14 mL, 0.22 mmol), flash chromatography eluting with pentane/DCM (5:1) afforded **6h** as light yellow liquid (33.3 mg, 66% yield, a mixture of two regioisomers).  $R_f$  0.5 (pentane/DCM = 3:1). Regioisomeric ratio was determined to be 9:1 by crude GCMS and GC.  $^1\text{H}$  NMR (300 MHz,  $\text{CDCl}_3$ )  $\delta$  1.86 – 1.71 (m, 2.2H), 1.65 – 1.42 (m, 4.4H), 1.40 – 1.30 (m, 2.2H), 1.24 (s, 1.2H) (minor isomer), 1.30 – 1.14 (m, 6.6H), 1.22 (s, 12H), 0.92 – 0.82 (m, 3.3H). Major isomer:  $^{13}\text{C}$  NMR (75 MHz,  $\text{CDCl}_3$ )  $\delta$  82.8, 38.7, 35.4, 30.3, 25.3, 24.7, 23.6, 14.1, *carbon attached to boron not observed*. Minor isomer:  $^{13}\text{C}$  NMR (75 MHz,  $\text{CDCl}_3$ )  $\delta$  82.7, 42.0, 33.2, 32.6, 32.1, 24.9, 22.2, 14.5, *carbon attached to boron not observed*.  $^{11}\text{B}$  NMR (96 MHz,  $\text{CDCl}_3$ )  $\delta$  34.9. **HRMS** (ESI)  $m/z$  = 275.2153 calcd. for  $\text{C}_{15}\text{H}_{29}\text{BO}_2\text{Na}^+$   $[\text{M}+\text{Na}]^+$ , found: 275.2160. **FTIR** (neat):  $\nu$  ( $\text{cm}^{-1}$ ) 2979, 2954, 2930, 2858, 1457, 1408, 1379, 1341, 1303, 1216, 1144, 979, 856.

Following **GP3**, using cyclopentylboronic acid pinacol ester **4h** (39.2 mg, 0.2 mmol) and *n*-butyllithium (1.6 M in hexane, 0.14 mL, 0.22 mmol), flash chromatography eluting with pentane/DCM (5:1) afforded **6h** as colorless liquid (33.0 mg, 65% yield, a mixture of two regioisomers).  $R_f$  0.5 (pentane/DCM = 3:1). Regioisomeric ratio was determined to be 7:1 by crude GC. According to crude GC analysis with *n*- $\text{C}_{14}\text{H}_{30}$  as internal standard, recovered yield of **4h** was 7% and the yield of *n*-butylboronic acid pinacol ester was 12%.

#### 4,4,5,5-Tetramethyl-2-(2,4,4-trimethylpentan-2-yl)-1,3,2-dioxaborolane (**6i**)

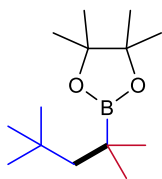

Following **GP1**, using **4i** (39.6 mg, 0.2 mmol) and isopropyllithium (0.7 M in pentane, 0.31 mL, 0.22 mmol), flash chromatography eluting with pentane/DCM (5:1) afforded **6i** as light yellow liquid (35.5 mg, 74% yield, a mixture of two regioisomers).  $R_f$  0.4 (pentane/DCM = 3:1). Regioisomeric ratio was determined to be 11.5:1 by crude GCMS and GC.  $^1\text{H}$  NMR (300 MHz,  $\text{CDCl}_3$ )  $\delta$  1.35 (s, 2H), 1.25 (s, 1.1H) (minor), 1.22 (s, 12H), 1.02 – 0.89 (m, 16.6H). Major isomer:  $^{13}\text{C}$  NMR (75 MHz,  $\text{CDCl}_3$ )  $\delta$  82.9, 54.5, 31.6, 31.3, 27.4, 24.8, *carbon attached to boron not observed*. Minor isomer:  $^{13}\text{C}$  NMR (75 MHz,  $\text{CDCl}_3$ )  $\delta$  82.6, 30.1, 26.7, 26.4, 25.3, 25.0, 22.6, *carbon attached to boron not observed*.  $^{11}\text{B}$  NMR (96 MHz,  $\text{CDCl}_3$ )  $\delta$  34.9. **HRMS** (ESI)  $m/z$  = 263.2153 calcd. for  $\text{C}_{14}\text{H}_{29}\text{BO}_2\text{Na}^+$   $[\text{M}+\text{Na}]^+$ , found: 263.2158. **FTIR** (neat):  $\nu$  ( $\text{cm}^{-1}$ ) 2979, 2953, 2905, 2869, 2837, 1480, 1388, 1369, 1339, 1305, 1271, 1197,

1146, 1130, 1102, 967, 867, 845, 714, 691, 669, 580.

2-(1-Isopropylcyclopentyl)-4,4,5,5-tetramethyl-1,3,2-dioxaborolane (**6j**)

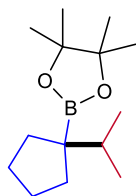

Following **GP2**, using **4j** (39.2 mg, 0.2 mmol) and isopropyllithium (0.7 M in pentane, 0.31 mL, 0.22 mmol), flash chromatography eluting with pentane/DCM (5:1) afforded **6j** as light yellow liquid (29.7 mg, 62% yield, a mixture of two regioisomers).  $R_f$  0.5 (pentane/DCM = 3:1). Regioisomeric ratio was determined to be 2.2:1 by crude GCMS and GC.  $^1\text{H}$  NMR (300 MHz,  $\text{CDCl}_3$ )  $\delta$  1.95 – 1.37 (m, 7H), 1.32 – 1.11 (m, 14H), 0.94 – 0.86 (m, 6H).  $^{13}\text{C}$  NMR (75 MHz,  $\text{CDCl}_3$ )  $\delta$  82.8, 82.7, 48.5, 36.4, 34.0, 28.1, 25.9, 25.7, 24.8, 24.7, 22.9, 20.6, *carbon attached to boron not observed*.  $^{11}\text{B}$  NMR (96 MHz,  $\text{CDCl}_3$ )  $\delta$  34.9. **HRMS** (ESI)  $m/z$  = 261.1996 calcd. for  $\text{C}_{14}\text{H}_{27}\text{BO}_2\text{Na}^+$   $[\text{M}+\text{Na}]^+$ , found: 261.1990. **FTIR** (neat):  $\nu$  ( $\text{cm}^{-1}$ ) 2977, 2951, 2867, 1473, 1371, 1338, 1302, 1271, 1214, 1196, 1141, 967, 863, 697, 670.

2-(1-Cyclopropylcyclobutyl)-4,4,5,5-tetramethyl-1,3,2-dioxaborolane (**6k**)

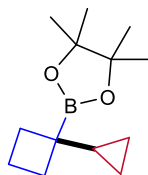

Following **GP1**, using cyclobutylboronic acid pinacol ester **4k** (36.4 mg, 0.2 mmol) and cyclopropyllithium (1.17 M in  $\text{Et}_2\text{O}$ , 0.19 mL, 0.22 mmol), flash chromatography eluting with pentane/DCM (5:1) afforded **6k** as light yellow liquid (23.7 mg, 53% yield).  $R_f$  0.5 (pentane/DCM = 3:1). Regioisomeric ratio was determined to be 11:1 by crude GCMS and GC.  $^1\text{H}$  NMR (300 MHz,  $\text{CDCl}_3$ )  $\delta$  2.05 – 1.89 (m, 2H), 1.87 – 1.52 (m, 4H), 1.26 (s, 12H), 0.98 – 0.83 (m, 1H), 0.39 – 0.25 (m, 2H), 0.25 – 0.14 (m, 2H).  $^{13}\text{C}$  NMR (75 MHz,  $\text{CDCl}_3$ )  $\delta$  83.0, 27.6, 24.7, 18.1, 16.8, 1.0, *carbon attached to boron not observed*.  $^{11}\text{B}$  NMR (96 MHz,  $\text{CDCl}_3$ )  $\delta$  34.5. **HRMS** (ESI)  $m/z$  = 245.1683 calcd. for  $\text{C}_{13}\text{H}_{23}\text{BO}_2\text{Na}^+$   $[\text{M}+\text{Na}]^+$ , found: 245.1697. **FTIR** (neat):  $\nu$  ( $\text{cm}^{-1}$ ) 3075, 2976, 2936, 2866, 1467, 1411, 1379, 1343, 1303, 1275, 1250, 1215, 1146, 1124, 1013, 967, 866, 840, 818, 684, 671, 579. According to crude GC analysis with  $n\text{-C}_{14}\text{H}_{30}$  as internal standard, recovered yield of **4k** was 3% and the yield of cyclopropylboronic acid pinacol ester was 17%.

Following **GP3**, using cyclobutylboronic acid pinacol ester **4k** (36.4 mg, 0.2 mmol) and cyclopropyllithium (1.17 M in  $\text{Et}_2\text{O}$ , 0.19 mL, 0.22 mmol), flash chromatography eluting with pentane/DCM (5:1) afforded **6k** as light yellow liquid (21.6 mg, 49% yield).  $R_f$  0.5 (pentane/DCM = 3:1). Regioisomeric ratio was determined to be 10:1 by crude GCMS and GC.  $^1\text{H}$  NMR (300 MHz,  $\text{CDCl}_3$ )  $\delta$  2.05 – 1.89 (m, 2H), 1.87 –

1.52 (m, 4H), 1.26 (s, 12H), 0.98 – 0.83 (m, 1H), 0.39 – 0.25 (m, 2H), 0.25 – 0.14 (m, 2H).  $^{13}\text{C}$  NMR (75 MHz,  $\text{CDCl}_3$ )  $\delta$  83.0, 27.6, 24.7, 18.1, 16.8, 1.0, *carbon attached to boron not observed*.  $^{11}\text{B}$  NMR (96 MHz,  $\text{CDCl}_3$ )  $\delta$  34.5. **HRMS** (ESI)  $m/z$  = 245.1683 calcd. for  $\text{C}_{13}\text{H}_{23}\text{BO}_2\text{Na}^+$   $[\text{M}+\text{Na}]^+$ , found: 245.1697. **FTIR** (neat):  $\nu$  ( $\text{cm}^{-1}$ ) 3075, 2976, 2936, 2866, 1467, 1411, 1379, 1343, 1303, 1275, 1250, 1215, 1146, 1124, 1013, 967, 866, 840, 818, 684, 671, 579. According to crude GC analysis with  $n\text{-C}_{14}\text{H}_{30}$  as internal standard, recovered yield of **4k** was 3% and the yield of cyclopropylboronic acid pinacol ester was 14%.

2-(1-Cyclopropylcyclopentyl)-4,4,5,5-tetramethyl-1,3,2-dioxaborolane (**6l**)

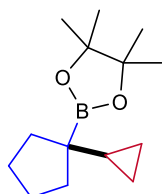

Following **GP1**, using **4l** (39.2 mg, 0.2 mmol) and cyclopropyllithium (0.85 M in  $\text{Et}_2\text{O}$ , 0.26 mL, 0.22 mmol), flash chromatography eluting with pentane/DCM (5:1) afforded **6l** as light yellow liquid (22.9 mg, 48% yield, single isomer).  $R_f$  0.5 (pentane/DCM = 3:1). Regioisomeric ratio was determined to be 13:1 by crude GCMS and GC. The other isomer was not collected.  $^1\text{H}$  NMR (300 MHz,  $\text{CDCl}_3$ )  $\delta$  1.82 – 1.66 (m, 2H), 1.66 – 1.40 (m, 4H), 1.32 – 1.14 (m, 14H), 0.82 – 0.67 (m, 1H), 0.34 – 0.23 (m, 2H), 0.23 – 0.14 (m, 2H).  $^{13}\text{C}$  NMR (75 MHz,  $\text{CDCl}_3$ )  $\delta$  82.9, 33.6, 25.4, 24.6, 17.3, 1.6, *carbon attached to boron not observed*.  $^{11}\text{B}$  NMR (96 MHz,  $\text{CDCl}_3$ )  $\delta$  34.6. **HRMS** (ESI)  $m/z$  = 259.1840 calcd. for  $\text{C}_{14}\text{H}_{25}\text{BO}_2\text{Na}^+$   $[\text{M}+\text{Na}]^+$ , found: 259.1856. **FTIR** (neat):  $\nu$  ( $\text{cm}^{-1}$ ) 3079, 2978, 2952, 2867, 1454, 1371, 1346, 1303, 1273, 1214, 1197, 1143, 1112, 1013, 977, 863, 819, 670.

2-(2-Cyclohexylpropan-2-yl)-4,4,5,5-tetramethyl-1,3,2-dioxaborolane (**6m**)

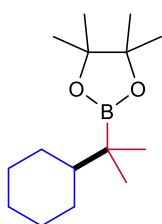

Following **GP1**, using **4m** (42.0 mg, 0.2 mmol) and isopropyllithium (0.70 M in pentane, 0.31 mL, 0.22 mmol), flash chromatography eluting with pentane/DCM (5:1) afforded **6m** as light yellow liquid (32.7 mg, 65% yield, a mixture of two isomers).  $R_f$  0.3 (pentane/DCM = 5:1). Regioisomeric ratio was determined to be 29:1 by crude GCMS and GC.  $^1\text{H}$  NMR (300 MHz,  $\text{CDCl}_3$ )  $\delta$  1.80 – 1.53 (m, 5H), 1.22 (s, 12H), 1.32 – 0.90 (m, 6H), 0.87 (s, 6H). Major isomer:  $^{13}\text{C}$  NMR (75 MHz,  $\text{CDCl}_3$ )  $\delta$  82.7, 45.5, 28.7, 27.1, 27.0, 24.7, 21.7, *carbon attached to boron not observed*. Minor isomer:  $^{13}\text{C}$  NMR (75 MHz,  $\text{CDCl}_3$ )  $\delta$  36.7, 32.9, 26.6, 25.6, 25.0, 18.9, *carbon attached to boron not observed*.  $^{11}\text{B}$  NMR (96 MHz,  $\text{CDCl}_3$ )  $\delta$  34.8. **HRMS** (ESI)  $m/z$  = 275.2153 calcd. for  $\text{C}_{15}\text{H}_{29}\text{BO}_2\text{Na}^+$   $[\text{M}+\text{Na}]^+$ , found: 275.2146. **FTIR** (neat):  $\nu$  ( $\text{cm}^{-1}$ )



2978, 2925, 2853, 1472, 1449, 1388, 1371, 1354, 1302, 1145, 1134, 967, 855, 807. According to crude GC analysis with *n*-C<sub>14</sub>H<sub>30</sub> as internal standard, recovered yield of **4m** was 9% and the yield of isopropylboronic acid pinacol ester was 5%.

Following **GP1**, using **4m** (42.0 mg, 0.2 mmol) and isopropylolithium (0.70 M in pentane, 0.31 mL, 0.22 mmol), flash chromatography eluting with pentane/DCM (5:1) afforded **6m** as light yellow liquid (26.7 mg, 53% yield, a mixture of two isomers). *R*<sub>f</sub> 0.3 (pentane/DCM = 5:1). Regioisomeric ratio was determined to be 24:1 by crude GCMS and GC. <sup>1</sup>H NMR (300 MHz, CDCl<sub>3</sub>) δ 1.80 – 1.53 (m, 5H), 1.22 (s, 12H), 1.32 – 0.90 (m, 6H), 0.87 (s, 6H). Major isomer: <sup>13</sup>C NMR (75 MHz, CDCl<sub>3</sub>) δ 82.7, 45.5, 28.7, 27.1, 27.0, 24.7, 21.7, *carbon attached to boron not observed*. Minor isomer: <sup>13</sup>C NMR (75 MHz, CDCl<sub>3</sub>) δ 36.7, 32.9, 26.6, 25.6, 25.0, 18.9, *carbon attached to boron not observed*. <sup>11</sup>B NMR (96 MHz, CDCl<sub>3</sub>) δ 34.8. **HRMS** (ESI) *m/z* = 275.2153 calcd. for C<sub>15</sub>H<sub>29</sub>BO<sub>2</sub>Na<sup>+</sup> [M+Na]<sup>+</sup>, found: 275.2146. **FTIR** (neat): ν (cm<sup>-1</sup>) 2978, 2925, 2853, 1472, 1449, 1388, 1371, 1354, 1302, 1145, 1134, 967, 855, 807. According to crude GC analysis with *n*-C<sub>14</sub>H<sub>30</sub> as internal standard, recovered yield of **4m** was 18% and the yield of isopropylboronic acid pinacol ester was 7%.

2-(2-Cycloheptylpropan-2-yl)-4,4,5,5-tetramethyl-1,3,2-dioxaborolane (**6n**)

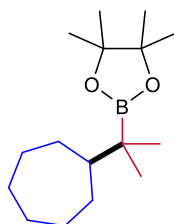

Following **GP1**, using cycloheptylboronic acid pinacol ester **4n** (44.8 mg, 0.2 mmol) and isopropylolithium (0.70 M in pentane, 0.31 mL, 0.22 mmol), flash chromatography eluting with pentane/DCM (5:1) afforded **6n** as light yellow liquid (37.1 mg, 70% yield, a mixture of two isomers). *R*<sub>f</sub> 0.3 (pentane/DCM = 3:1). Regioisomeric ratio was determined to be 31:1 by crude GCMS and GC. <sup>1</sup>H NMR (300 MHz, CDCl<sub>3</sub>) δ 1.77 – 1.31 (m, 11H), 1.22 (s, 12H), 1.29 – 1.12 (m, 2H), 0.86 (s, 6H). <sup>13</sup>C NMR (75 MHz, CDCl<sub>3</sub>) δ 82.7, 45.6, 30.3, 28.1, 28.1, 21.1, *carbon attached to boron not observed*. <sup>11</sup>B NMR (96 MHz, CDCl<sub>3</sub>) δ 34.7. **HRMS** (ESI) *m/z* = 289.2309 calcd. for C<sub>16</sub>H<sub>31</sub>BO<sub>2</sub>Na<sup>+</sup> [M+Na]<sup>+</sup>, found: 289.2334. **FTIR** (neat): ν (cm<sup>-1</sup>) 2979, 2924, 2857, 1471, 1387, 1371, 1355, 1303, 1270, 1214, 1142, 968, 858, 691, 671. According to crude GC analysis with *n*-C<sub>14</sub>H<sub>30</sub> as internal standard, the yield of **6n** was 76%, recovered yield of **4n** was 7% and the yield of isopropylboronic acid pinacol ester was 13%.

Following **GP3**, using cycloheptylboronic acid pinacol ester **4n** (44.8 mg, 0.2 mmol) and isopropylolithium (0.70 M in pentane, 0.31 mL, 0.22 mmol), flash chromatography eluting with pentane/DCM (5:1) afforded **6n** as colorless liquid (34.0 mg, 64% yield, a mixture of two isomers). *R*<sub>f</sub> 0.3 (pentane/DCM = 3:1). Regioisomeric ratio was

determined to be 31:1 by crude GCMS and GC.  $^1\text{H}$  NMR (300 MHz,  $\text{CDCl}_3$ )  $\delta$  1.77 – 1.31 (m, 11H), 1.22 (s, 12H), 1.29 – 1.12 (m, 2H), 0.86 (s, 6H).  $^{13}\text{C}$  NMR (75 MHz,  $\text{CDCl}_3$ )  $\delta$  82.7, 45.6, 30.3, 28.1, 28.1, 21.1, *carbon attached to boron not observed*.  $^{11}\text{B}$  NMR (96 MHz,  $\text{CDCl}_3$ )  $\delta$  34.7. **HRMS** (ESI)  $m/z$  = 289.2309 calcd. for  $\text{C}_{16}\text{H}_{31}\text{BO}_2\text{Na}^+$   $[\text{M}+\text{Na}]^+$ , found: 289.2334. **FTIR** (neat):  $\nu$  ( $\text{cm}^{-1}$ ) 2979, 2924, 2857, 1471, 1387, 1371, 1355, 1303, 1270, 1214, 1142, 968, 858, 691, 671. According to crude GC analysis with  $n\text{-C}_{14}\text{H}_{30}$  as internal standard, crude yield of **6n** was 69%, recovered yield of **4n** was 9% and the yield of isopropylboronic acid pinacol ester was 14%.

2-(2-Adamantan-2-yl)propan-2-yl)-4,4,5,5-tetramethyl-1,3,2-dioxaborolane (**6o**)

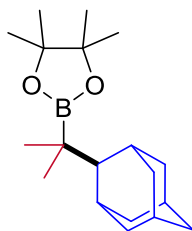

Following **GP1**, using **4o** (52.4 mg, 0.2 mmol) and isopropyllithium (0.70 M in pentane, 0.31 mL, 0.22 mmol), flash chromatography eluting with pentane/DCM (5:1) afforded **6o** as white solid (33.8 mg, 56% yield, a mixture of two isomers).  $R_f$  0.4 (pentane/DCM = 5:1). M.p. = 61 – 62 °C. Regioisomeric ratio was determined to be 25:1 by crude GCMS and GC.  $^1\text{H}$  NMR (300 MHz,  $\text{CDCl}_3$ )  $\delta$  2.16 – 1.94 (m, 4H), 1.90 – 1.64 (m, 8H), 1.57 – 1.43 (m, 3H), 1.23 (s, 12H), 0.99 (s, 6H).  $^{13}\text{C}$  NMR (75 MHz,  $\text{CDCl}_3$ )  $\delta$  82.8, 56.0, 41.0, 38.6, 32.9, 30.0, 28.7, 27.5, 26.3, 24.8, *carbon attached to boron not observed*.  $^{11}\text{B}$  NMR (96 MHz,  $\text{CDCl}_3$ )  $\delta$  35.1. **HRMS** (ESI)  $m/z$  = 327.2466 calcd. for  $\text{C}_{19}\text{H}_{33}\text{BO}_2\text{Na}^+$   $[\text{M}+\text{Na}]^+$ , found: 327.2455. **FTIR** (neat):  $\nu$  ( $\text{cm}^{-1}$ ) 2976, 2903, 2850, 1476, 1455, 1389, 1371, 1315, 1296, 1257, 1137, 967, 859, 702.

2-(3-Methoxy-2-methylheptan-2-yl)-4,4,5,5-tetramethyl-1,3,2-dioxaborolane (**6p**)

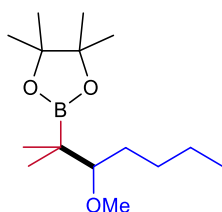

Following **GP1**, using **4p** (45.6 mg, 0.2 mmol) and isopropyllithium (0.70 M in pentane, 0.31 mL, 0.22 mmol), flash chromatography eluting with pentane/ethyl acetate (15:1) afforded **6p** as light yellow liquid (39.0 mg, 72% yield).  $R_f$  0.5 (pentane/ethyl acetate = 10:1).  $^1\text{H}$  NMR (300 MHz,  $\text{CDCl}_3$ )  $\delta$  3.42 (s, 3H), 3.09 (dd,  $J$  = 8.2, 2.9 Hz, 1H), 1.56 – 1.26 (m, 6H), 1.22 (s, 6H), 1.21 (s, 6H), 1.00 – 0.82 (m, 9H).  $^{13}\text{C}$  NMR (75 MHz,  $\text{CDCl}_3$ )  $\delta$  87.7, 82.9, 60.4, 32.3, 29.8, 24.7, 24.5, 23.1, 20.7, 19.5, 14.1, *carbon attached to boron not observed*.  $^{11}\text{B}$  NMR (96 MHz,  $\text{CDCl}_3$ )  $\delta$  34.2. **HRMS** (ESI)  $m/z$  = 293.2258 calcd. for  $\text{C}_{19}\text{H}_{33}\text{BO}_3\text{Na}^+$   $[\text{M}+\text{Na}]^+$ , found: 293.2275. **FTIR** (neat):  $\nu$  ( $\text{cm}^{-1}$ ) 2975, 2957, 2934, 2873, 2825, 1470, 1371, 1343, 1307, 1274, 1215, 1136, 1095, 967, 849, 691, 674, 579.



4,4,5,5-Tetramethyl-2-(2-methyl-3-(ethylthio)heptan-2-yl)-1,3,2-dioxaborolane (**6q**)

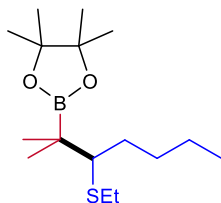

Following **GP1**, using **4q** (51.6 mg, 0.2 mmol) and isopropyllithium (0.70 M in pentane, 0.31 mL, 0.22 mmol), flash chromatography eluting with pentane/ethyl acetate (20:1) afforded **6q** as light yellow liquid (37.7 mg, 63% yield).  $R_f$  0.7 (pentane/ethyl acetate = 10:1).  $^1\text{H}$  NMR (300 MHz,  $\text{CDCl}_3$ )  $\delta$  2.60 (q,  $J = 7.4$  Hz, 2H), 2.49 (dd,  $J = 10.4, 2.6$  Hz, 1H), 1.80 – 1.28 (m, 6H), 1.26 – 1.17 (m, 15H), 1.00 (s, 3H), 0.96 – 0.84 (m, 6H).  $^{13}\text{C}$  NMR (75 MHz,  $\text{CDCl}_3$ )  $\delta$  83.0, 56.3, 33.8, 30.6, 28.8, 24.8, 24.5, 22.8, 22.1, 20.8, 15.1, 14.1, *carbon attached to boron not observed*.  $^{11}\text{B}$  NMR (96 MHz,  $\text{CDCl}_3$ )  $\delta$  34.4. **HRMS** (ESI)  $m/z = 323.2187$  calcd. for  $\text{C}_{16}\text{H}_{33}\text{BO}_2\text{SNa}^+$   $[\text{M}+\text{Na}]^+$ , found: 323.2192. **FTIR** (neat):  $\nu$  ( $\text{cm}^{-1}$ ) 2958, 2928, 2869, 1468, 1371, 1343, 1307, 1138, 1118, 967, 850, 671.

Tert-butyl

2-isopropyl-2-(4,4,5,5-tetramethyl-1,3,2-dioxaborolan-2-yl)pyrrolidine-1-carboxylate (**6r-1**)

Tert-butyl

2-(2-(4,4,5,5-tetramethyl-1,3,2-dioxaborolan-2-yl)propan-2-yl)pyrrolidine-1-carboxylate (**6r-2**)

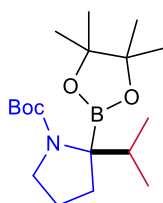

**6r-1**

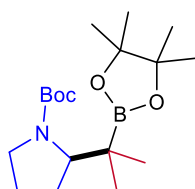

**6r-2**

Following **GP1**, using **4r** (59.4 mg, 0.2 mmol) and isopropyllithium (0.70 M in pentane, 0.31 mL, 0.22 mmol), flash chromatography eluting with pentane/ethyl acetate (20:1) afforded **6r-1** as colorless sticky oil (40.5 mg, 60% yield),  $R_f$  0.6 (pentane/ethyl acetate = 10:1); **6r-2** as colorless sticky oil (10.9 mg, 16% yield),  $R_f$  0.5 (pentane/ethyl acetate = 10:1). Regioisomeric ratio was determined to be 4:1 by crude GCMS and GC.

**6r-1**:  $^1\text{H}$  NMR (600 MHz,  $\text{DMSO-d}_6$ , 363 K)  $\delta$  3.58 – 3.47 (m, 1H), 3.20 – 3.08 (m, 1H), 2.35 – 2.18 (m, 1H), 1.94 – 1.63 (m, 4H), 1.45 (d,  $J = 1.2$  Hz, 9H), 1.25 (s, 6H), 1.23 (s, 6H), 0.96 (d,  $J = 6.9$  Hz, 3H), 0.80 (br, 3H).  $^{13}\text{C}$  NMR (151 MHz,  $\text{DMSO-d}_6$ , 363 K)  $\delta$  82.1, 77.7, 46.6, 30.1, 28.5, 27.8, 24.3, 24.0, 18.1, 16.5, *carbonyl and carbon attached to boron not observed*.  $^{11}\text{B}$  NMR (96 MHz,  $\text{CDCl}_3$ , 297 K)  $\delta$  32.5. **HRMS** (ESI)  $m/z = 362.2473$  calcd. for  $\text{C}_{18}\text{H}_{34}\text{BNO}_4\text{Na}^+$   $[\text{M}+\text{Na}]^+$ , found: 362.2491. **FTIR** (neat):  $\nu$  ( $\text{cm}^{-1}$ ) 2975, 2934, 1681, 1479, 1403, 1366, 1311, 1243, 1215, 1167, 1143, 1097,

987, 972, 862, 771.

**6r-2:**  $^1\text{H}$  NMR (600 MHz, DMSO- $d_6$ , 363 K)  $\delta$  3.88 – 3.82 (m, 1H), 3.61 – 3.51 (m, 1H), 3.16 – 3.09 (m, 1H), 1.92 – 1.80 (m, 2H), 1.74 – 1.61 (m, 2H), 1.45 (s, 9H), 1.23 (s, 12H), 0.85 (s, 3H), 0.82 (s, 3H).  $^{13}\text{C}$  NMR (151 MHz, DMSO- $d_6$ , 363 K)  $\delta$  154.3, 81.7, 78.2, 62.5, 46.9, 27.8, 24.4, 24.3, 23.2, 20.9, *carbon attached to boron not observed*.  $^{11}\text{B}$  NMR (96 MHz,  $\text{CDCl}_3$ , 297 K)  $\delta$  26.5. **HRMS** (ESI)  $m/z$  = 362.2473 calcd. for  $\text{C}_{18}\text{H}_{34}\text{BNO}_4\text{Na}^+$   $[\text{M}+\text{Na}]^+$ , found: 362.2493. **FTIR** (neat):  $\nu$  ( $\text{cm}^{-1}$ ) 2974, 2871, 1685, 1473, 1419, 1385, 1366, 1324, 1308, 1167, 1143, 1124, 969, 861, 772.

Tert-butyl

2-butyl-2-(4,4,5,5-tetramethyl-1,3,2-dioxaborolan-2-yl)pyrrolidine-1-carboxylate (**6s**)

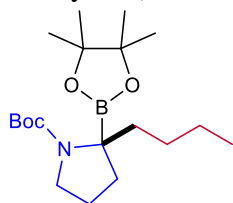

Following **GP1**, using **4s** (59.4 mg, 0.2 mmol) and isopropyllithium (0.70 M in pentane, 0.31 mL, 0.22 mmol), flash chromatography eluting with pentane/ethyl acetate (10:1) afforded **6s** as colorless sticky oil (41.2 mg, 58% yield, single isomer),  $R_f$  0.6 (pentane/ethyl acetate = 10:1). Regioisomeric ratio was determined to be 32:1 by crude GCMS and GC. The other isomer was not collected.  $^1\text{H}$  NMR (300 MHz,  $\text{CDCl}_3$ )  $\delta$  3.67 – 3.34 (m, 1H), 3.35 – 3.13 (m, 1H), 2.01 – 1.47 (m, 7H), 1.43 (s, 9H), 1.38 – 1.26 (m, 3H), 1.24 (s, 6H), 1.21 (s, 6H), 0.88 (t,  $J$  = 7.1 Hz, 3H).  $^{13}\text{C}$  NMR (75 MHz,  $\text{CDCl}_3$ )  $\delta$  83.1, 78.9, 46.7, 34.6, 32.8, 28.6, 26.7, 25.1, 24.5, 23.4, 14.3, *carbonyl and carbon attached to boron not observed*.  $^{11}\text{B}$  NMR (96 MHz,  $\text{CDCl}_3$ )  $\delta$  32.1. **HRMS** (ESI)  $m/z$  = 376.2630 calcd. for  $\text{C}_{19}\text{H}_{36}\text{BNO}_4\text{Na}^+$   $[\text{M}+\text{Na}]^+$ , found: 376.2633. **FTIR** (neat):  $\nu$  ( $\text{cm}^{-1}$ ) 2978, 2934, 1677, 1402, 1380, 1367, 1166, 1143, 1052, 1025, 1006, 822, 760, 732, 700.

4,4,5,5-Tetramethyl-2-(2,3,3-trimethylbutan-2-yl)-1,3,2-dioxaborolane (**6t**)

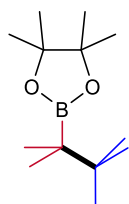

Following **GP1**, using **4t** (36.8 mg, 0.2 mmol) and isopropyllithium (0.70 M in pentane, 0.31 mL, 0.22 mmol), flash chromatography eluting with pentane/DCM (5:1) afforded **6t** as light yellow liquid (22.2 mg, 50% yield).  $R_f$  0.5 (pentane/DCM = 5:1).  $^1\text{H}$  NMR (300 MHz,  $\text{CDCl}_3$ )  $\delta$  1.22 (s, 12H), 0.90 (s, 9H), 0.88 (s, 6H).  $^{13}\text{C}$  NMR (75 MHz,  $\text{CDCl}_3$ )  $\delta$  82.7, 33.9, 26.7, 24.7, 20.7, *carbon attached to boron not observed*.  $^{11}\text{B}$  NMR (96 MHz,  $\text{CDCl}_3$ )  $\delta$  34.8. **HRMS** (ESI)  $m/z$  = 249.1996 calcd. for  $\text{C}_{19}\text{H}_{33}\text{BO}_2\text{Na}^+$   $[\text{M}+\text{Na}]^+$ , found: 249.2005. **FTIR** (neat):  $\nu$  ( $\text{cm}^{-1}$ ) 2971, 2872, 1464, 1401, 1379, 1371, 1339, 1298, 1261, 1214, 1150, 1121, 1022, 967, 877, 852, 805, 718, 682.

2-(6-(2,5-Dimethylphenoxy)-2,3,3-trimethylhexan-2-yl)-4,4,5,5-tetramethyl-1,3,2-dioxaborolane (**6u**)

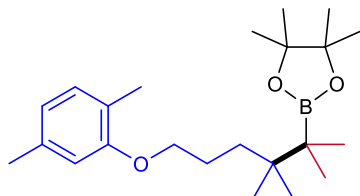

Following **GP1**, using **4u** (66.4 mg, 0.2 mmol) and isopropyllithium (0.70 M in pentane, 0.31 mL, 0.22 mmol), flash chromatography eluting with pentane/DCM (3:1) afforded **6u** as light yellow sticky oil (23.8 mg, 32% yield),  $R_f$  0.6 (pentane/DCM = 2:1).  $^1\text{H}$  NMR (300 MHz,  $\text{CDCl}_3$ )  $\delta$  7.00 (d,  $J = 7.3$  Hz, 1H), 6.70 – 6.60 (m, 2H), 3.92 (t,  $J = 6.6$  Hz, 2H), 2.32 (s, 3H), 2.19 (s, 3H), 1.85 – 1.68 (m, 2H), 1.53 – 1.42 (m, 2H), 1.22 (s, 12H), 0.93 – 0.89 (m, 12H).  $^{13}\text{C}$  NMR (75 MHz,  $\text{CDCl}_3$ )  $\delta$  157.2, 136.4, 130.2, 123.6, 120.5, 112.0, 82.7, 69.0, 36.1, 34.5, 24.8, 24.7, 22.5, 21.4, 20.4, 15.8, *carbon attached to boron not observed*.  $^{11}\text{B}$  NMR (96 MHz,  $\text{CDCl}_3$ )  $\delta$  34.8. **HRMS** (ESI)  $m/z = 397.2884$  calcd. for  $\text{C}_{23}\text{H}_{39}\text{BO}_3\text{Na}^+$   $[\text{M}+\text{Na}]^+$ , found: 397.2897. **FTIR** (neat):  $\nu$  ( $\text{cm}^{-1}$ ) 2973, 2959, 2872, 1617, 1586, 1509, 1466, 1379, 1371, 1338, 1297, 1266, 1147, 1120, 1037, 967, 850, 802.

2-(1-((1S,4aS,10aS)-7-Isopropyl-1,4a-dimethyl-1,2,3,4,4a,9,10,10a-octahydrophenanthren-1-yl)-2-methylpropan-2-yl)-4,4,5,5-tetramethyl-1,3,2-dioxaborolane (**6v**)

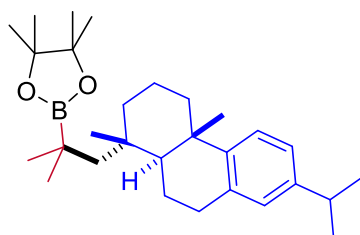

Following **GP1**, using **4v** (74.1 mg, 0.187 mmol) and isopropyllithium (0.70 M in pentane, 0.29 mL, 0.22 mmol), flash chromatography eluting with pentane/DCM (3:1) afforded **6v** as light yellow sticky oil (43.4 mg, 50% yield),  $R_f$  0.5 (pentane/DCM = 2:1).  $[\alpha]_D^{24} +4$  ( $c$  0.4,  $\text{CHCl}_3$ ). The other regioisomer was not detected by crude GCMS.  $^1\text{H}$  NMR (300 MHz,  $\text{CDCl}_3$ )  $\delta$  7.16 (d,  $J = 8.2$  Hz, 1H), 6.98 (dd,  $J = 8.2, 1.6$  Hz, 1H), 6.90 (s, 1H), 3.00 – 2.72 (m, 3H), 2.33 – 2.19 (m, 1H), 2.10 – 1.89 (m, 1H), 1.80 – 1.52 (m, 5H), 1.51 – 1.29 (m, 4H), 1.25 (s, 3H), 1.24 – 1.19 (m, 18H), 0.99 (s, 6H), 0.96 (s, 3H).  $^{13}\text{C}$  NMR (75 MHz,  $\text{CDCl}_3$ )  $\delta$  148.1, 145.3, 135.0, 126.8, 124.0, 123.6, 82.9, 55.5, 51.0, 38.7, 37.9, 37.0, 33.5, 30.6, 28.1, 27.7, 25.5, 24.8, 24.7, 24.0, 20.1, 19.0, 1.0, *carbon attached to boron not observed*.  $^{11}\text{B}$  NMR (96 MHz,  $\text{CDCl}_3$ )  $\delta$  34.7. **HRMS** (ESI)  $m/z = 461.3561$  calcd. for  $\text{C}_{29}\text{H}_{47}\text{BNaO}_2^+$   $[\text{M}+\text{Na}]^+$ , found: 461.3553. **FTIR** (neat):  $\nu$  ( $\text{cm}^{-1}$ ) 2957, 2926, 2867, 1477, 1456, 1389, 1371, 1340, 1303, 1264, 1212, 1165, 1141, 1108, 1094, 1020, 967, 863, 847, 821, 802, 738, 704, 691, 670.

(*R*)-2-(2,3-Dimethyl-3-phenethylheptan-2-yl)-4,4,5,5-tetramethyl-1,3,2-dioxaborolane

(6w)

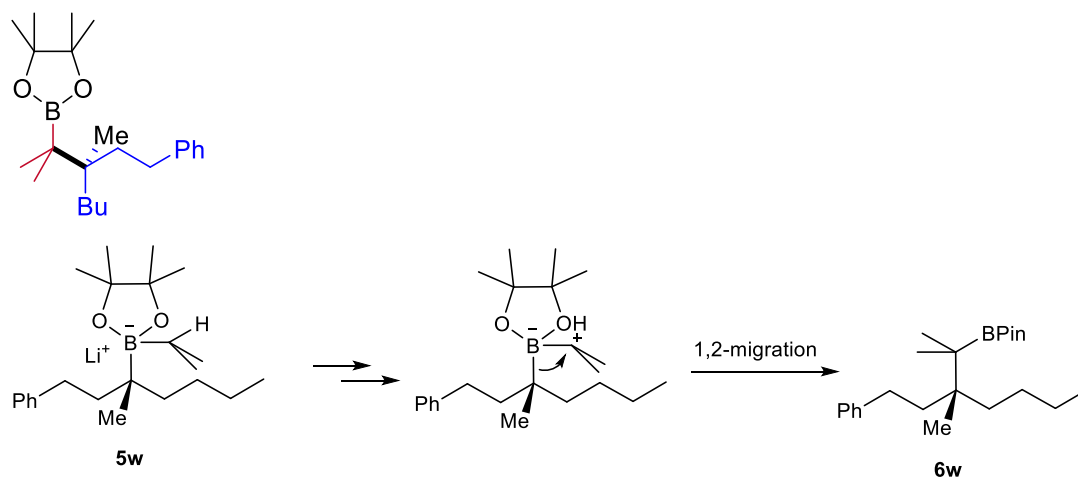

Following **GP1**, using **4w** (73.2 mg, 0.2 mmol, 99% ee) and isopropyllithium (0.70 M in pentane, 0.31 mL, 0.22 mmol), flash chromatography eluting with pentane/DCM (5:1) afforded **6w** as colorless sticky oil (21.4 mg, 30% yield, 97% ee),  $R_f$  0.5 (pentane/DCM = 3:1). Ee determined by chiral HPLC after oxidation (NaOH/H<sub>2</sub>O<sub>2</sub>). <sup>17</sup>S<sup>17</sup> <sup>1</sup>H NMR (300 MHz, CDCl<sub>3</sub>)  $\delta$  7.23 – 7.15 (m, 2H), 7.15 – 7.04 (m, 3H), 2.62 – 2.33 (m, 2H), 1.74 – 1.17 (m, 8H), 1.14 (s, 12H), 0.94 – 0.75 (m, 12H). <sup>13</sup>C NMR (75 MHz, CDCl<sub>3</sub>)  $\delta$  144.2, 128.3, 128.2, 125.4, 82.6, 39.3, 39.0, 36.7, 31.8, 27.4, 24.7, 24.1, 21.2, 21.1, 14.3, *carbon attached to boron not observed*. <sup>11</sup>B NMR (96 MHz, CDCl<sub>3</sub>)  $\delta$  34.1. **HRMS** (ESI)  $m/z$  = 381.2935 calcd. for C<sub>23</sub>H<sub>39</sub>BO<sub>2</sub>Na<sup>+</sup> [M+Na]<sup>+</sup>, found: 381.2937. **FTIR** (neat):  $\nu$  (cm<sup>-1</sup>) 2956, 2933, 2870, 1603, 1497, 1468, 1389, 1371, 1331, 1295, 1214, 1143, 1118, 1031, 966, 855, 750, 720, 698, 687, 670, 583. **Chiral HPLC** (IC, 1% *i*PrOH/cyclohexane, 1.0 ml/min)  $T_R$  7.06 min (major), 8.15 min (minor).  $[\alpha]_D^{25}$  +2 (*c* 1.0, CHCl<sub>3</sub>).

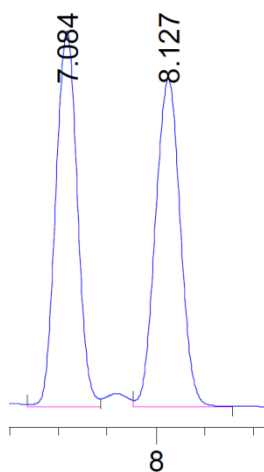

| Peak # | RetTime [min] | Type | Width [min] | Area [mAU*s] | Height [mAU] | Area %  |
|--------|---------------|------|-------------|--------------|--------------|---------|
| 1      | 7.084         | VV   | 0.2440      | 4336.93262   | 281.06567    | 49.8763 |
| 2      | 8.127         | VB   | 0.2835      | 4358.45215   | 245.08438    | 50.1237 |

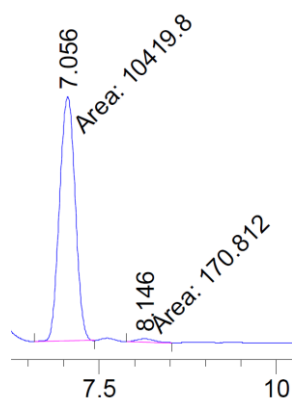

| Peak # | RetTime [min] | Type | Width [min] | Area [mAU*s] | Height [mAU] | Area %  |
|--------|---------------|------|-------------|--------------|--------------|---------|
| 1      | 7.056         | MM   | 0.2563      | 1.04198e4    | 677.45465    | 98.3871 |
| 2      | 8.146         | MM   | 0.2946      | 170.81223    | 9.66340      | 1.6129  |

(*R*)-Tert-butyl

2-(2-(4,4,5,5-tetramethyl-1,3,2-dioxaborolan-2-yl)propan-2-yl)piperidine-1-carboxylate (**6x**)

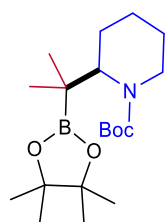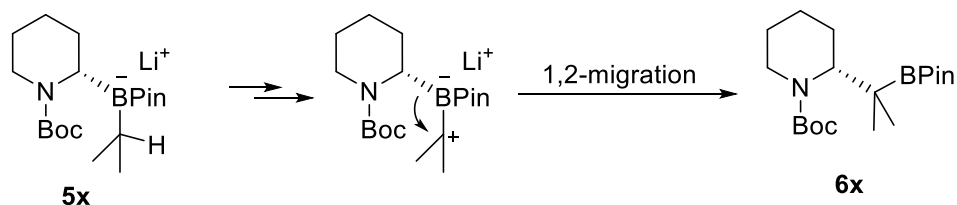

Following **GP1**, using *S*-**4x** (62.2 mg, 0.2 mmol, 73% ee) and isopropyllithium (0.70 M in pentane, 0.31 mL, 0.22 mmol), flash chromatography eluting with pentane/ ethyl acetate (10:1) afforded *R*-**6u** as colorless sticky oil (31.4 mg, 44% yield, 73% ee). Regioisomeric ratio was determined to be 10:1 by crude GC and GCMS. The other regioisomer was not collected.  $R_f$  0.6 (pentane/ethyl acetate = 20:3).  $^1\text{H}$  NMR (600 MHz, DMSO- $d_6$ , 363 K)  $\delta$  3.79 – 3.57 (m, 2H), 3.29 – 3.10 (m, 1H), 1.83 – 1.72 (m, 1H), 1.71 – 1.59 (m, 2H), 1.52 – 1.47 (m, 2H), 1.46 (s, 9H), 1.43 – 1.36 (m, 1H), 1.24 (s, 12H), 0.94 (s, 6H).  $^{13}\text{C}$  NMR (151 MHz, DMSO- $d_6$ , 363 K)  $\delta$  154.9, 81.8, 78.3, 27.7, 24.8, 24.3, 24.3, 23.6, 23.5, 22.6, 20.2, carbon attached to boron and two carbons attached to nitrogen not observed.  $^{11}\text{B}$  NMR (192MHz, DMSO- $d_6$ , 363 K)  $\delta$  31.3. **HRMS** (ESI)  $m/z$  = 376.2630 calcd. for  $\text{C}_{19}\text{H}_{36}\text{BNO}_4\text{Na}^+$   $[\text{M}+\text{Na}]^+$ , found: 376.2643. **FTIR** (neat):  $\nu$  ( $\text{cm}^{-1}$ ) 2975, 2937, 1680, 1653, 1573, 1476, 1390, 1365, 1269, 1139, 1051, 1024, 1004, 822, 762, 733, 699, 632. **Chiral HPLC** (IC, 0.25%

*i*PrOH/cyclohexane, 1.0 ml/min)  $T_R$  8.97min (minor), 9.66 min (major).  $[\alpha]_D^{25} +27$  (*c* 0.5, CHCl<sub>3</sub>).

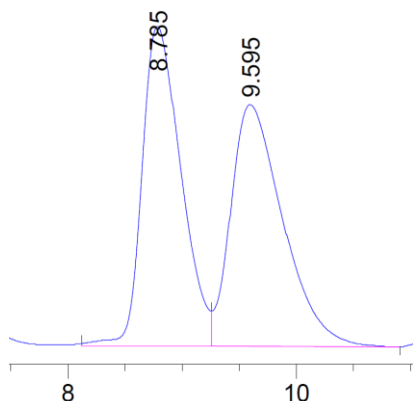

| Peak # | RetTime [min] | Type | Width [min] | Area [mAU*s] | Height [mAU] | Area %  |
|--------|---------------|------|-------------|--------------|--------------|---------|
| 1      | 8.785         | BV   | 0.3646      | 1592.75366   | 67.18864     | 49.6145 |
| 2      | 9.595         | VB   | 0.4837      | 1617.50757   | 50.77238     | 50.3855 |

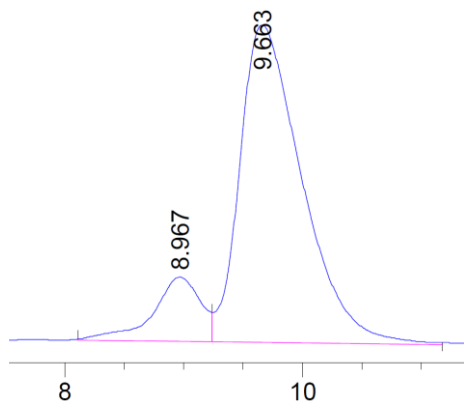

| Peak # | RetTime [min] | Type | Width [min] | Area [mAU*s] | Height [mAU] | Area %  |
|--------|---------------|------|-------------|--------------|--------------|---------|
| 1      | 8.967         | BV   | 0.4163      | 317.26120    | 11.27349     | 13.5692 |
| 2      | 9.663         | VB   | 0.5521      | 2020.83142   | 55.58543     | 86.4308 |

4,4,5,5-Tetramethyl-2-(2-((1*S*,2*R*,3*S*,5*S*)-2,6,6-trimethylbicyclo[3.1.1]heptan-3-yl)propan-2-yl)-1,3,2-dioxaborolane (**6y**)

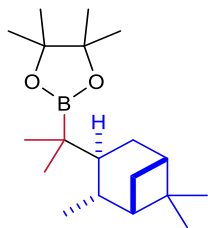

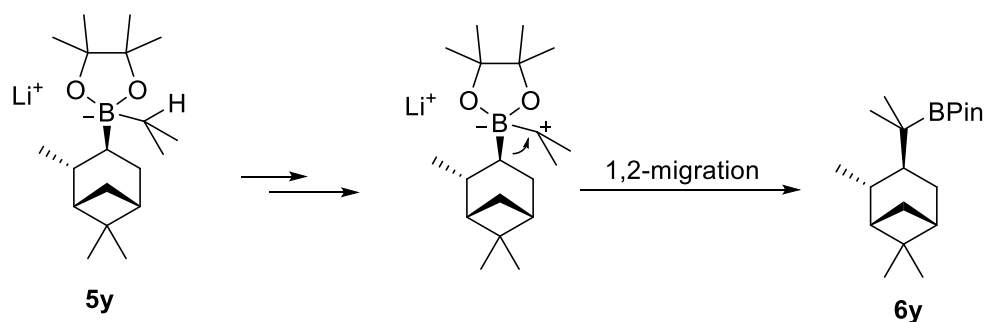

Following **GP1**, using **4y** (52.8 mg, 0.2 mmol, dr = 92:8) and isopropyllithium (0.70 M in pentane, 0.31 mL, 0.22 mmol), flash chromatography eluting with pentane/DCM (5:1) afforded **6y** as colorless sticky oil (42.6 mg, 70% yield, dr = 93:7),  $R_f$  0.5 (pentane/DCM = 3:1).  $[\alpha]_D^{26} +9$  ( $c$  0.46,  $\text{CHCl}_3$ ).  $^1\text{H}$  NMR (300 MHz,  $\text{CDCl}_3$ )  $\delta$  2.17 – 1.78 (m, 6H), 1.74 – 1.66 (m, 1H), 1.56 – 1.45 (m, 1H), 1.22 (s, 6H), 1.22 (s, 6H), 1.06 (d,  $J$  = 7.0 Hz, 3H), 1.03 (s, 3H), 0.98 (s, 3H), 0.95 (s, 3H), 0.94 (s, 3H).  $^{13}\text{C}$  NMR (75 MHz,  $\text{CDCl}_3$ )  $\delta$  82.8, 49.1, 43.0, 41.7, 39.0, 36.4, 32.0, 31.8, 31.2, 27.8, 24.9, 24.6, 24.2, 23.4, 21.0, *carbon attached to boron not observed*.  $^{11}\text{B}$  NMR (96 MHz,  $\text{CDCl}_3$ )  $\delta$  33.7. **HRMS** (ESI)  $m/z$  = 329.2622 calcd. for  $\text{C}_{19}\text{H}_{35}\text{BO}_2\text{Na}^+$   $[\text{M}+\text{Na}]^+$ , found: 329.2629. **FTIR** (neat):  $\nu$  ( $\text{cm}^{-1}$ ) 2978, 2896, 2868, 1471, 1388, 1347, 1302, 1262, 1229, 1214, 1140, 1124, 1078, 1022, 967, 863, 839, 692, 672. Diastereomeric ratio was determined by chiral GC.

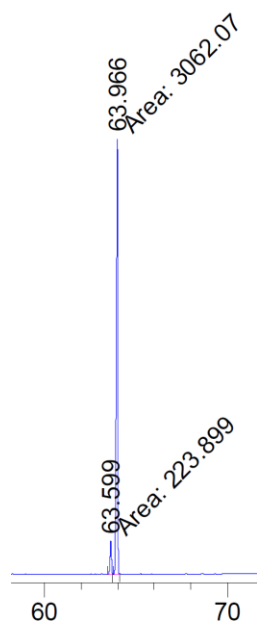

2-(2-((1*R*,2*S*,5*R*)-2-Isopropyl-5-methylcyclohexyl)propan-2-yl)-4,4,5,5-tetramethyl-1,3,2-dioxaborolane (**6z**)

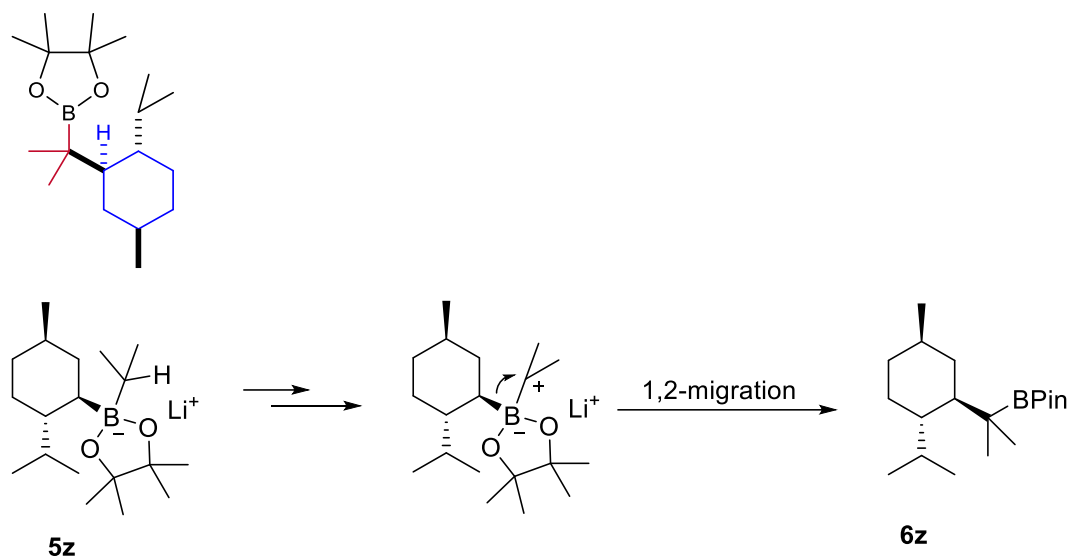

Following **GP1**, using **4z** (41.8 mg, 0.157 mmol, dr > 99:1) and isopropyllithium (0.70 M in pentane, 0.25 mL, 0.35 mmol, 1.1 equiv), flash chromatography eluting with pentane/DCM (5:1) afforded **6z** as colorless sticky oil (23.5 mg, 49% yield, dr > 99:1),  $R_f$  0.5 (pentane/DCM = 3:1).  $[\alpha]_D^{26}$  -65 ( $c$  0.71,  $\text{CHCl}_3$ ).  $^1\text{H}$  NMR (300 MHz,  $\text{CDCl}_3$ )  $\delta$  1.73 – 1.46 (m, 5H), 1.25 (s, 6H), 1.19 (s, 6H), 1.04 – 0.93 (m, 2H), 0.92 – 0.73 (m, 17H), 0.71 – 0.55 (m, 1H).  $^{13}\text{C}$  NMR (75 MHz,  $\text{CDCl}_3$ )  $\delta$  82.7, 45.4, 42.9, 35.3, 34.6, 33.0, 27.2, 25.4, 24.5, 24.0, 23.1, 22.4, 17.4, 16.8, *carbon attached to boron not observed*.  $^{11}\text{B}$  NMR (96 MHz,  $\text{CDCl}_3$ )  $\delta$  34.2. **HRMS** (ESI)  $m/z$  = 331.2779 calcd. for  $\text{C}_{19}\text{H}_{37}\text{BO}_2\text{Na}^+$   $[\text{M}+\text{Na}]^+$ , found: 331.2788. **FTIR** (neat):  $\nu$  ( $\text{cm}^{-1}$ ) 2952, 2925, 2869, 1468, 1387, 1370, 1349, 1301, 1266, 1164, 1143, 1127, 1089, 966, 876, 853, 842, 710, 686. Diastereomer ratio was determined by chiral GC.

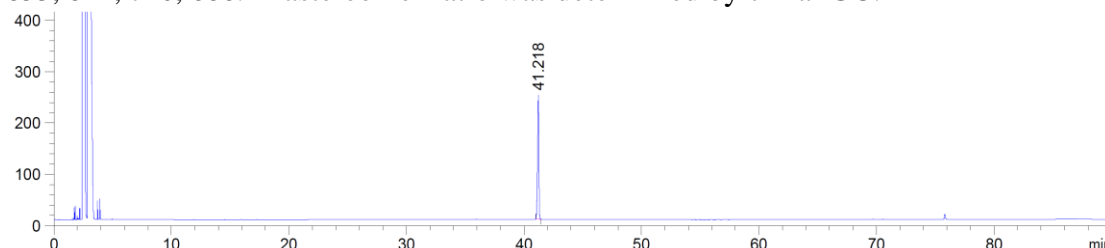

2-((3*S*,5*R*,6*S*,8*S*,9*S*,10*R*,13*R*,14*S*,17*R*)-3-Methoxy-10,13-dimethyl-17-((*R*)-6-methylheptan-2-yl)hexadecahydro-1*H*-cyclopenta[*a*]phenanthren-6-yl)propan-2-yl)-4,4,5,5-tetramethyl-1,3,2-dioxaborolane (**6aa**)

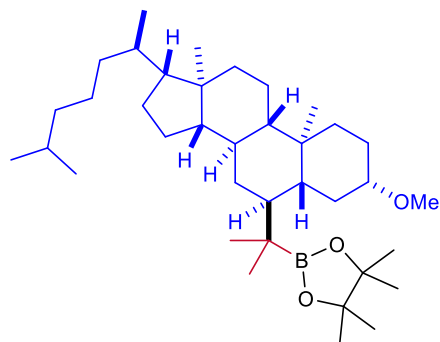



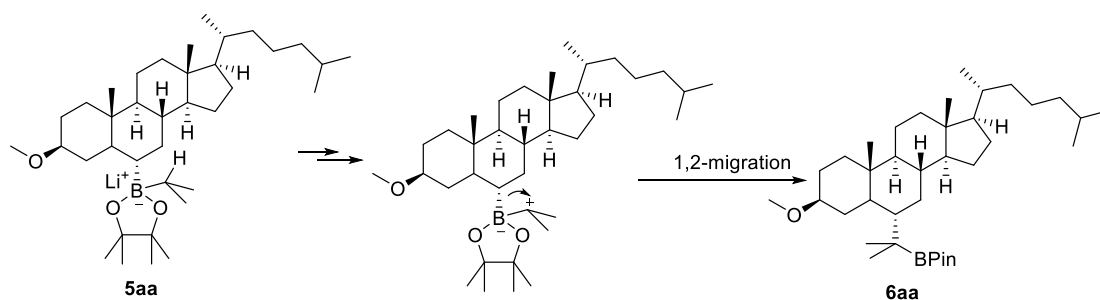

Following **GP1**, using **4aa** (62.6 mg, 0.119 mmol) and isopropylolithium (0.70 M in pentane, 0.19 mL, 0.13 mmol, 1.1 equiv), flash chromatography eluting with DCM afforded **6aa** as light yellow sticky oil (46.4 mg, 69% yield),  $R_f$  0.2 (DCM).  $[\alpha]_D^{26} +25$  ( $c$  0.57,  $\text{CHCl}_3$ ).  $^1\text{H}$  NMR (300 MHz,  $\text{CDCl}_3$ )  $\delta$  3.32 (s, 3H), 3.05 – 2.87 (m, 1H), 2.02 – 1.89 (m, 1H), 1.88 – 1.69 (m, 4H), 1.69 – 1.42 (m, 5H), 1.40 – 1.26 (m, 6H), 1.23 (s, 12H), 1.17 – 0.94 (m, 10H), 0.92 – 0.81 (m, 19H), 0.76 (s, 3H), 0.63 (s, 3H).  $^{13}\text{C}$  NMR (75 MHz,  $\text{CDCl}_3$ )  $\delta$  82.9, 81.1, 56.7, 56.4, 55.9, 54.5, 47.5, 42.7, 40.1, 40.0, 39.5, 37.6, 36.4, 36.2, 35.8, 35.1, 31.2, 30.6, 28.3, 28.0, 27.9, 24.8, 24.8, 24.4, 24.3, 23.9, 22.8, 22.6, 21.4, 18.7, 16.7, 13.7, 12.0, *carbon attached to boron not observed*.  $^{11}\text{B}$  NMR (96 MHz,  $\text{CDCl}_3$ )  $\delta$  33.9. **HRMS** (ESI)  $m/z$  = 593.5075 calcd. for  $\text{C}_{37}\text{H}_{67}\text{BO}_2\text{Na}^+$   $[\text{M}+\text{Na}]^+$ , found: 593.5082. **FTIR** (neat):  $\nu$  ( $\text{cm}^{-1}$ ) 2935, 2902, 2868, 2849, 1469, 1444, 1378, 1347, 1304, 1267, 1210, 1140, 1104, 966, 850, 710, 687, 577.

*Dr* and *rr* were determined by GCMS analysis after protondeboronation of **6aa**. The minor isomers were not detected by GCMS.

2-(2-((3*S*,5*R*,6*S*,8*S*,9*S*,10*R*,13*R*,14*S*,17*R*)-3-Chloro-10,13-dimethyl-17-((*R*)-6-methylheptan-2-yl)hexadecahydro-1*H*-cyclopenta[*a*]phenanthren-6-yl)propan-2-yl)-4,4,5,5-tetramethyl-1,3,2-dioxaborolane (**6ab**)

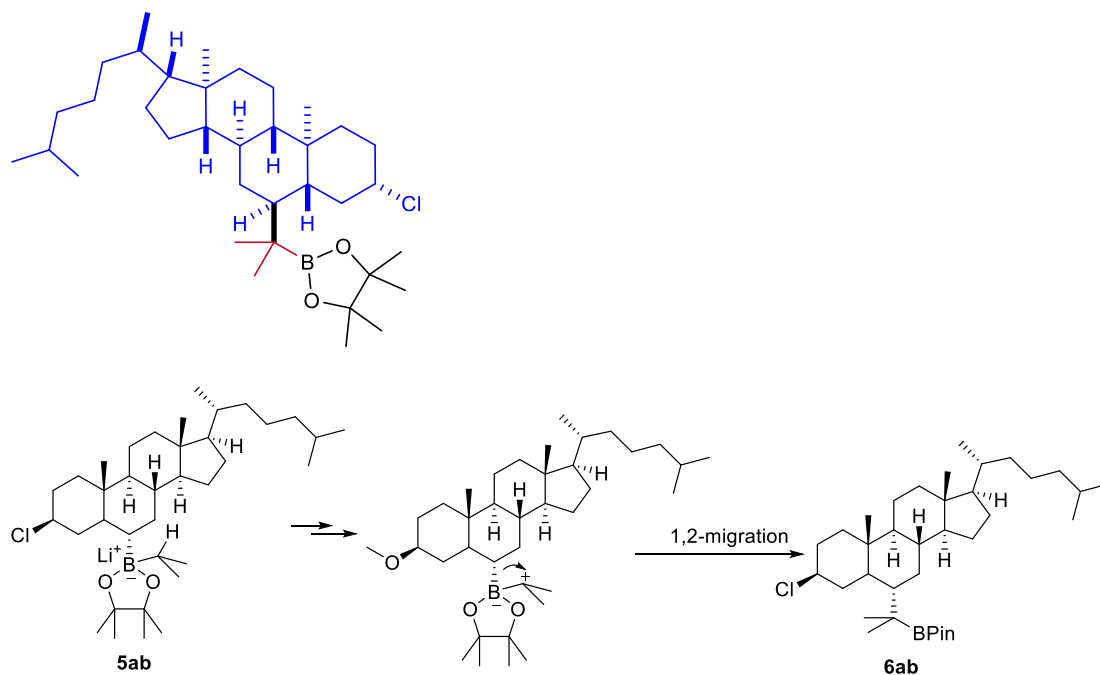

Following **GP1**, using **4ab** (106.6 mg, 0.2 mmol) and isopropylolithium (0.70 M in

pentane, 0.31 mL, 0.22 mmol, 1.1 equiv), flash chromatography eluting with pentane/DCM (4:1) afforded **6ab** as white solid (55.2 mg, 48% yield),  $R_f$  0.4 (pentane/DCM = 3:1). M.p.: 71 – 73 °C.  $[\alpha]_D^{25} +35$  ( $c$  0.2,  $\text{CHCl}_3$ ).  $^1\text{H}$  NMR (300 MHz,  $\text{CDCl}_3$ )  $\delta$  3.89 – 3.67 (m, 1H), 2.04 – 1.91 (m, 2H), 1.91 – 1.70 (m, 4H), 1.70 – 1.41 (m, 7H), 1.40 – 1.30 (m, 5H), 1.25 (s, 6H), 1.24 (s, 6H), 1.17 – 0.94 (m, 10H), 0.88 (t,  $J$  = 7.8 Hz, 16H), 0.76 (s, 3H), 0.63 (s, 3H), 0.60 – 0.44 (m, 1H).  $^{13}\text{C}$  NMR (75 MHz,  $\text{CDCl}_3$ )  $\delta$  83.0, 61.4, 56.6, 56.3, 54.2, 49.3, 42.6, 40.0, 39.9, 39.5, 39.3, 36.6, 36.2, 35.9, 35.8, 35.0, 33.0, 30.3, 28.3, 28.0, 25.0, 24.8, 24.5, 24.3, 23.9, 22.8, 22.7, 21.3, 18.7, 16.4, 13.7, 12.0, *carbon attached to boron not observed*.  $^{11}\text{B}$  NMR (96 MHz,  $\text{CDCl}_3$ )  $\delta$  34.2. **HRMS** (ESI)  $m/z$  = 597.4580 calcd. for  $\text{C}_{36}\text{H}_{64}\text{BClO}_2\text{Na}^+$   $[\text{M}+\text{Na}]^+$ , found: 597.4571. **FTIR** (neat):  $\nu$  ( $\text{cm}^{-1}$ ) 2948, 2869, 1468, 1444, 1372, 1347, 1306, 1167, 1139, 966, 908, 850, 732, 688.

*Dr* and *rr* were determined by GCMS analysis after protondeboronation of **6ab**. The minor isomers were not detected by GCMS.

## 7. DFT Calculations

### 7.1 General information for computation

All structures were optimized without geometry constraints using the BH-LYP hybrid functional<sup>S28-29</sup> and an atom-pairwise dispersion correction (D3)<sup>S30-31</sup>. A flexible triple zeta basis set (def2-TZVP)<sup>S32</sup> and the COSMO implicit solvation model<sup>S33</sup> with a dielectric constant of  $\epsilon = 37.5$  ( $\text{CH}_3\text{CN}$ ) were used in all calculations. For the calculation of zero point vibrational energies and free enthalpy contributions ( $G_{298}$ ) with BH-LYP-D3, a rotor approximation was applied for the harmonic vibrational modes with wave numbers below  $100\text{ cm}^{-1}$ .<sup>S34</sup> Electronic energies were recalculated with the double hybrid functional PWPB95(-D3)<sup>S35</sup> with the structures obtained with BH-LYP-D3, including a solvation energy obtained with the C-PCM<sup>S36</sup> solvent model for acetonitrile. PWPB95 includes a component of the correlation energy which is computed by perturbation theory and performs more accurately in the determination of energies, even for open shell molecules.

All geometry optimizations and vibrational frequency calculations were performed with the TURBOMOLE program<sup>S37</sup>. PWPB95-D3 calculations were performed with the ORCA program<sup>S38</sup>.

### 7.2 Results

#### Transition Structures and HAT products

The electronic energies and thermodynamic corrections for the Gibbs free energy  $G(298\text{K})$  are summarized in Table S3, the optimized structures are depicted in Figure S5 and S6.

**Table S3:** Electronic energies ( $E$ ) and thermodynamic correction to the Gibbs Free Energy at  $T = 298.15\text{ K}$  ( $G_{298}$ ) for the structures involved in the reaction with  $\text{CF}_3$  radical.

| Structure                                                                                               | E(BH-LYP-D3) <sup>[a][b]</sup><br>[E <sub>h</sub> ] | G(298) <sup>[a][b]</sup><br>[kcal/mol] | E(PWPB95-D3) <sup>[a][c]</sup><br><sup>1</sup> [E <sub>h</sub> ] |
|---------------------------------------------------------------------------------------------------------|-----------------------------------------------------|----------------------------------------|------------------------------------------------------------------|
| $\cdot\text{CF}_3$                                                                                      | -337.5903708                                        | -8.447                                 | -337.5717281                                                     |
| CF <sub>3</sub> H                                                                                       | -338.26902979                                       | -0.001                                 | -338.2508622                                                     |
| H <sub>3</sub> CCH <sub>2</sub> -Ph (EtPh)                                                              | -338.2508622                                        | 81.517                                 | -310.7712210                                                     |
| [F <sub>3</sub> C...H...CH(CH <sub>3</sub> )Ph] <sup>‡</sup><br>(EtPh-TS)                               | -648.3958687                                        | 83.228                                 | -648.3316871                                                     |
| $\cdot\text{CH}(\text{CH}_3)\text{Ph}$ (EtPh-Rad)                                                       | -310.1760955                                        | 72.322                                 | -310.1244915                                                     |
| [H(CH <sub>3</sub> ) <sub>2</sub> C(Ph)B(Pin)] <sup>⊖</sup><br>(Pinacolate)                             | -761.4423831                                        | 207.925                                | -761.3378077                                                     |
| [F <sub>3</sub> C...H...C(CH <sub>3</sub> ) <sub>2</sub> CB(Ph)(P<br>in)] <sup>⊖‡</sup> (Pinacolate-TS) | -1099.0253656                                       | 209.142                                | -1098.9038920                                                    |
| [ $\cdot\text{C}(\text{CH}_3)_2\text{B}(\text{Ph})(\text{Pin})$ ] <sup>⊖</sup><br>(Pinacolate-Rad)      | -760.7868038                                        | 197.751                                | -760.6802061                                                     |
| <b>5j</b> -Anion                                                                                        | -725.7302176                                        | 233.631                                | -725.6198361                                                     |
| <b>5m</b> -Anion                                                                                        | -765.0404387                                        | 252.563                                | -764.9204867                                                     |
| <b>5j</b> -TS <sub>iPr</sub>                                                                            | -1063.3154861                                       | 234.913                                | -1063.1881145                                                    |
| <b>5j</b> -TS <sub>cPent</sub>                                                                          | -1063.3164816                                       | 235.643                                | -1063.1897087                                                    |
| <b>5m</b> -TS <sub>iPr</sub>                                                                            | -1102.6292394                                       | 253.569                                | -1102.4924885                                                    |
| <b>5m</b> -TS <sub>cHex</sub>                                                                           | -1102.6257927                                       | 254.123                                | -1102.4886454                                                    |

[a] All energies have been calculated with the def2-TZVP basis set

[b] using the COSMO solvation model, implemented in Turbomole ( $\epsilon = 37.5$ )

[c] Energy calculation for the structure optimized with BH-LYP-D3/def2-TZVP and with the C-PCM implicit solvation model (Solvent: acetonitrile).

We have performed a conformational search for all conformers of boron-ate complexes **5j** and **5m** (anion only). The conformers were subjected to reaction with a CF<sub>3</sub> radical in HAT reactions of the isopropyl and the cycloalkyl group. Only the most stable conformers of each anion and the two according transition structures with the lowest free energy are reported here (Figure S2). The relative barrier heights correctly predict the preferred products, namely **6j** with a ratio of 1.58:1 (exp: 2.2:1) and **6m** with a ratio of 150.6:1 (exp.: 29:1).

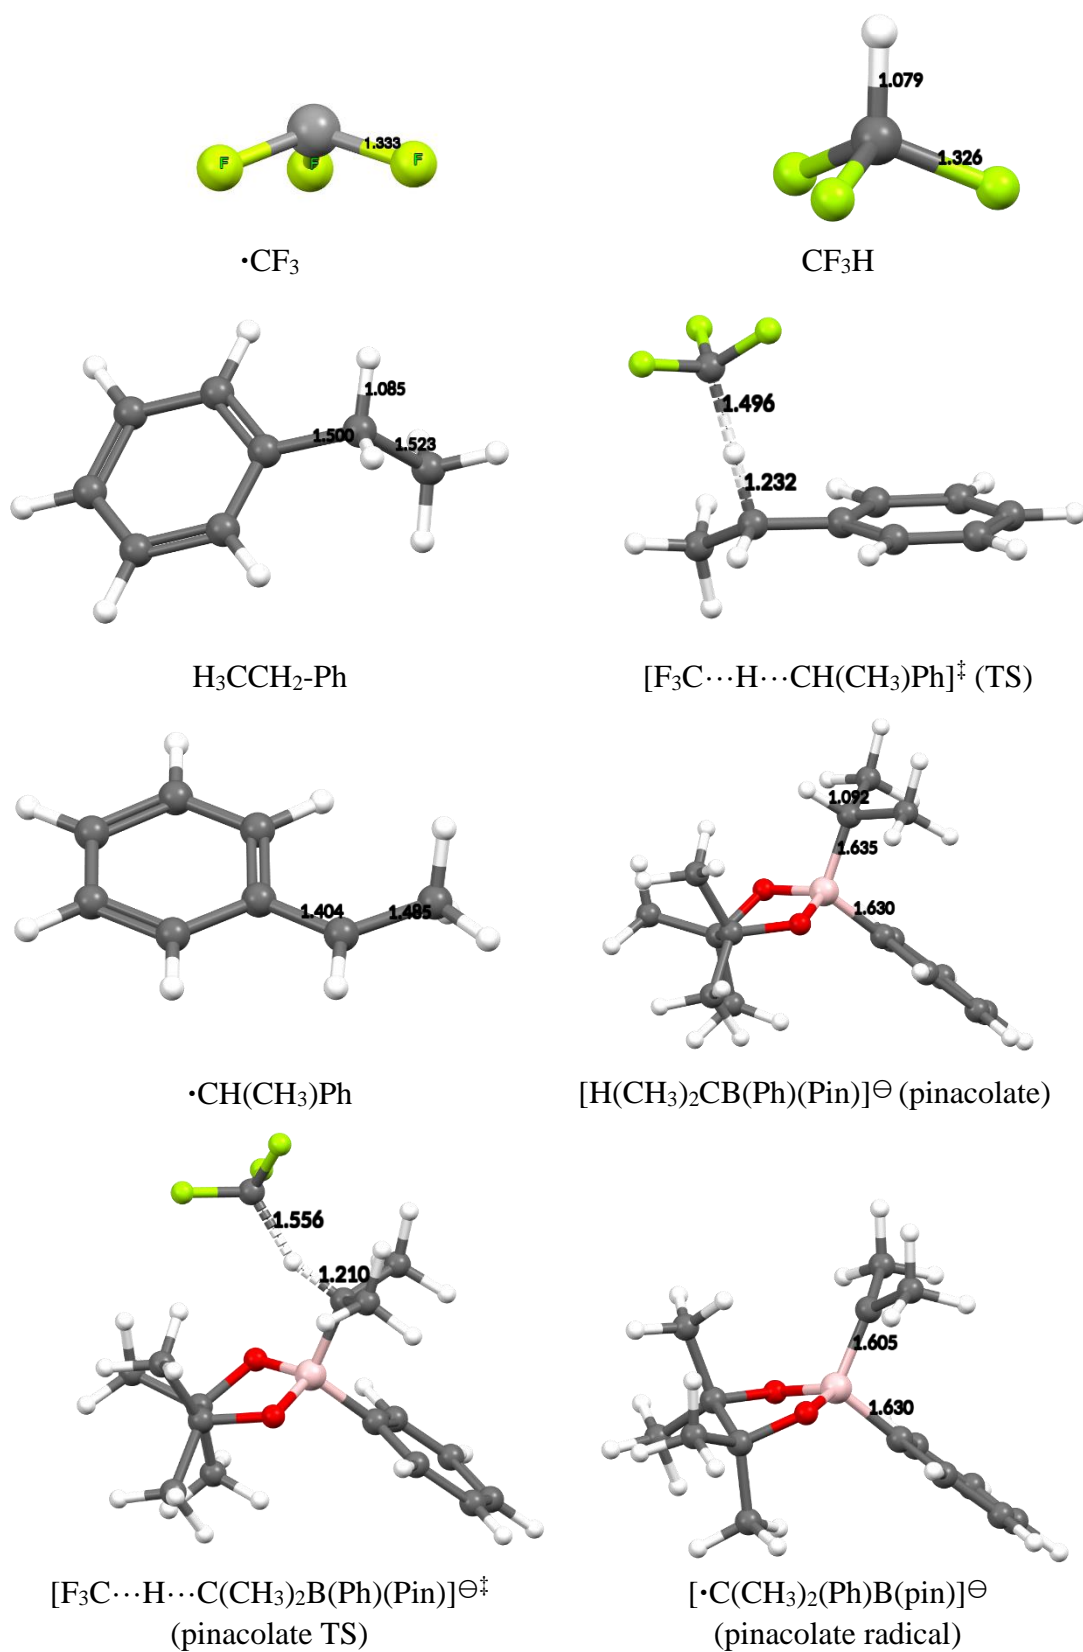

**Figure S5.** Optimized Structures in the reaction of radical  $\cdot\text{CF}_3$  with ethyl benzene and the phenyl isopropyl boron-ate complex. (BH-LYP-D3/def2-TZVP +COSMO( $\epsilon = 37.5$ )). Distances are given in Å.

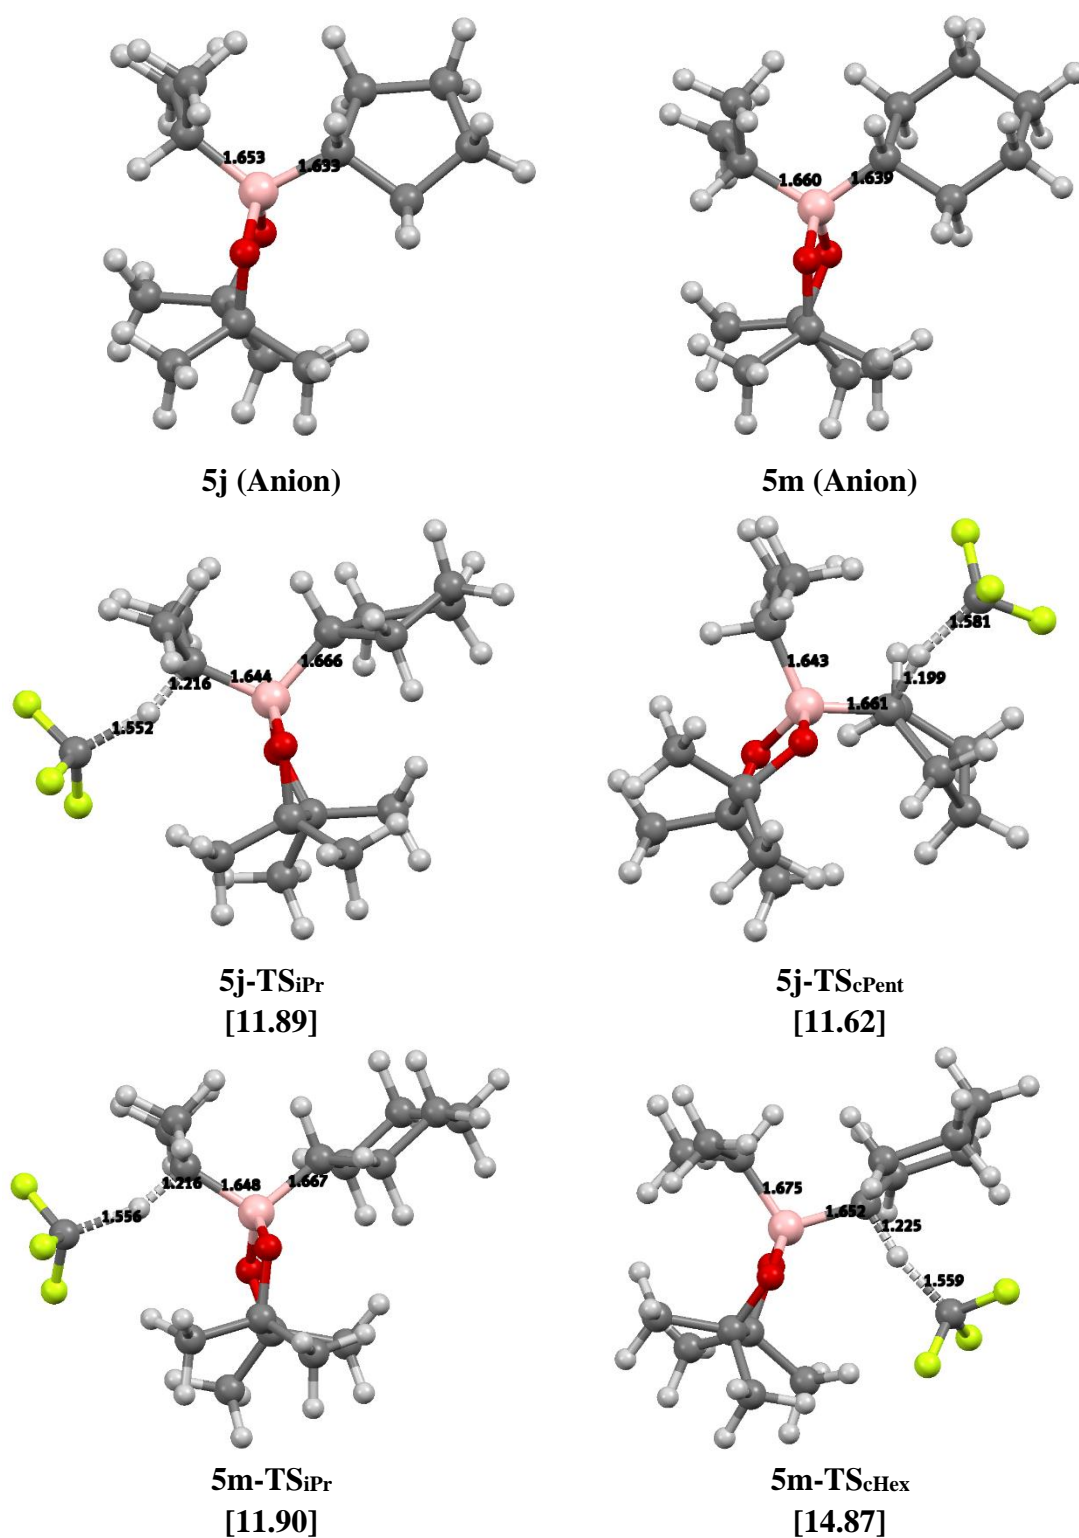

**Figure S6.** Optimized Structures of the most stable conformations of boron-ate complexes **5j** (*i*Pr/*cy*Pentyl) and **5m** (*i*Pr/*cy*Hexyl) and the favored transition structures in the HAT reaction with radical  $\cdot\text{CF}_3$ . (BH-LYP-D3/def2-TZVP +COSMO( $\epsilon = 37.5$ )). Distances are given in Å. Free energies ( $\Delta G_{298}$ ) relative to the boron-ate complex in kcal/mol are given in square brackets.



**Cartesian Coordinates** (in Å) of all optimized structures reported in Table S1.  
 Lowest harmonic vibrational frequencies in cm<sup>-1</sup>.

### CF3 radical

E(BH-LYP-D3/def2-TZVP) = -337.5903707494 (conv)

Lowest Freq. = 529.07 cm<sup>-1</sup>

4

CF3 (CF3/c1/bhlyp-d3.def2-TZVP\_COSMO\_37.5)

|   |           |            |            |
|---|-----------|------------|------------|
| C | 1.1711941 | 0.0213555  | 0.0398263  |
| F | 1.5185977 | 0.0835525  | 1.2946534  |
| F | 1.6025755 | -1.0749561 | -0.5179996 |
| F | 1.5694598 | 1.0754761  | -0.6154600 |

### CF3H

E(BH-LYP-D3/def2-TZVP) = -338.2690297933 (conv)

Lowest Freq. = 527.12 cm<sup>-1</sup>

5

CF3H (CF3H/c1/bhlyp-d3.def2-TZVP\_COSMO\_37.5)

|   |           |            |            |
|---|-----------|------------|------------|
| H | 0.0249365 | 0.0011027  | 0.0000588  |
| C | 1.1026042 | 0.0198655  | 0.0377755  |
| F | 1.5339586 | 0.0834396  | 1.2897903  |
| F | 1.6171219 | -1.0699074 | -0.5147688 |
| F | 1.5832061 | 1.0709276  | -0.6118356 |

### EtPh

E(BH-LYP-D3/def2-TZVP) = -310.8193020414 (conv)

Lowest Freq. = 32.89 cm<sup>-1</sup>

18

EtPh (031/c1/bhlyp-d3.def2-TZVP\_COSMO\_37.5)

|   |            |            |            |
|---|------------|------------|------------|
| C | -0.7791974 | 0.0606751  | -0.0873873 |
| C | -1.5273013 | 1.1458984  | -0.5179717 |
| C | -1.4511714 | -1.0807023 | 0.3223917  |
| C | -2.8319116 | -1.1376789 | 0.3053681  |
| C | -2.9080338 | 1.0949244  | -0.5371538 |
| C | -3.5662110 | -0.0484144 | -0.1242856 |
| H | -0.8872496 | -1.9346510 | 0.6558053  |
| H | -1.0229309 | 2.0390262  | -0.8441448 |
| H | -3.3338227 | -2.0335513 | 0.6242203  |
| H | -3.4697714 | 1.9462124  | -0.8776435 |
| H | -4.6400939 | -0.0913515 | -0.1411353 |
| C | 0.7171980  | 0.1361423  | -0.0245040 |
| H | 1.0801247  | 0.7718098  | -0.8252722 |

|   |           |            |            |
|---|-----------|------------|------------|
| H | 1.1350905 | -0.8513711 | -0.1890938 |
| C | 1.2130100 | 0.6766010  | 1.3107675  |
| H | 0.8295645 | 1.6756038  | 1.4879830  |
| H | 2.2962755 | 0.7212381  | 1.3308437  |
| H | 0.8848724 | 0.0434457  | 2.1280079  |



### EtPh-TS

E(BH-LYP-D3/def2-TZVP) = -310.1760954609 (conv)

Lowest Freq. = 60.45 cm<sup>-1</sup>

17

EtPh-TS (032/c1/bhlyp-d3.def2-TZVP\_COSMO\_37.5)

|   |            |            |            |
|---|------------|------------|------------|
| C | -0.8341424 | 0.0605821  | 0.2174012  |
| C | -1.6027231 | 1.2046308  | -0.0849443 |
| C | -1.5105747 | -1.1776416 | 0.2721073  |
| C | -2.8605419 | -1.2623802 | 0.0399584  |
| C | -2.9548278 | 1.1077768  | -0.3153025 |
| C | -3.5967201 | -0.1212122 | -0.2558673 |
| H | -0.9473158 | -2.0653651 | 0.5002629  |
| H | -1.1252400 | 2.1653928  | -0.1362322 |
| H | -3.3509551 | -2.2181059 | 0.0873057  |
| H | -3.5192653 | 1.9941429  | -0.5435399 |
| H | -4.6536363 | -0.1897392 | -0.4365607 |
| C | 0.5473842  | 0.1258728  | 0.4563611  |
| H | 1.0549071  | -0.7954426 | 0.6813735  |
| C | 1.3428334  | 1.3791307  | 0.4198858  |
| H | 1.2789051  | 1.8688281  | -0.5496138 |
| H | 2.3865997  | 1.1811250  | 0.6234276  |
| H | 0.9912496  | 2.1009972  | 1.1543843  |

### EtPh-Rad

E(BH-LYP-D3/def2-TZVP) = -648.3958687174 (conv)

Lowest Freq. = -1562.98 cm<sup>-1</sup>

22

EtPh-Rad (031TS/c1/bhlyp-d3.def2-TZVP\_COSMO\_37.5)

|   |            |            |            |
|---|------------|------------|------------|
| C | -0.6399212 | 0.6680476  | -0.4698628 |
| C | -1.4438882 | 1.7928487  | -0.3265682 |
| C | -1.2436374 | -0.5309542 | -0.8332796 |
| C | -2.6051221 | -0.6074231 | -1.0409691 |
| C | -2.8067084 | 1.7182931  | -0.5347967 |
| C | -3.3936814 | 0.5190339  | -0.8927157 |
| H | -0.6360737 | -1.4113051 | -0.9484841 |
| H | -1.0075856 | 2.7342223  | -0.0491164 |
| H | -3.0518662 | -1.5457282 | -1.3159903 |
| H | -3.4118099 | 2.5989412  | -0.4165435 |
| H | -4.4549124 | 0.4622111  | -1.0527269 |
| C | 0.8265199  | 0.7240694  | -0.2952258 |
| H | 1.2830216  | 1.0412742  | -1.3951342 |
| H | 1.2466957  | -0.2644806 | -0.1627840 |
| C | 1.4005993  | 1.7257868  | 0.6730040  |

|   |           |           |            |
|---|-----------|-----------|------------|
| H | 1.1276304 | 2.7423308 | 0.4178595  |
| H | 2.4820011 | 1.6644723 | 0.6819897  |
| H | 1.0444730 | 1.5288917 | 1.6797275  |
| C | 1.8293786 | 1.5229362 | -2.7021639 |
| F | 3.0794100 | 1.1365024 | -2.8589836 |
| F | 1.7759832 | 2.8400858 | -2.7359422 |
| F | 1.0982930 | 1.0357825 | -3.6840613 |

## Pinacolate

E(BH-LYP-D3/def2-TZVP) = -761.4423831268 (conv)

Lowest Freq. = 34.94 cm<sup>-1</sup>

42

Pinacolate (022/c1/bhlyp-d3.def2-TZVP\_COSMO\_37.5)

|   |            |            |            |
|---|------------|------------|------------|
| C | 0.7714482  | -2.8591935 | -1.0231189 |
| C | 0.0894699  | -2.2406647 | 0.1869886  |
| C | 0.8055470  | -2.6555972 | 1.4634131  |
| H | 0.8411429  | -3.7381919 | 1.5842570  |
| H | 0.3190026  | -2.2392274 | 2.3402783  |
| H | 1.8317339  | -2.2972019 | 1.4639879  |
| H | -0.9244623 | -2.6430362 | 0.2324241  |
| B | -0.0927269 | -0.6215695 | 0.0521016  |
| O | -0.9089911 | -0.2527778 | -1.1395168 |
| C | -2.1437330 | 0.2610953  | -0.7248728 |
| C | -3.1714527 | -0.8657820 | -0.6826717 |
| H | -2.9053232 | -1.6007770 | 0.0648833  |
| H | -3.1850409 | -1.3557429 | -1.6499713 |
| H | -4.1709194 | -0.5004189 | -0.4718995 |
| C | -2.6114860 | 1.3102081  | -1.7151552 |
| H | -3.5176575 | 1.8006268  | -1.3733851 |
| H | -1.8497116 | 2.0612980  | -1.8737335 |
| H | -2.8260811 | 0.8402433  | -2.6696222 |
| C | -1.8332566 | 0.8129777  | 0.6945124  |
| C | -1.1866294 | 2.1939357  | 0.6365110  |
| H | -0.3636740 | 2.2053702  | -0.0646964 |
| H | -0.7939974 | 2.4332395  | 1.6185277  |
| H | -1.8993480 | 2.9619557  | 0.3563076  |
| C | -3.0301725 | 0.8724961  | 1.6227288  |
| H | -3.4392394 | -0.1135653 | 1.7976575  |
| H | -2.7289679 | 1.2874988  | 2.5791576  |
| H | -3.8129891 | 1.5048048  | 1.2160478  |
| O | -0.9110094 | -0.1198628 | 1.1876204  |
| C | 1.3517130  | 0.1283890  | -0.0298844 |
| C | 1.9816210  | 0.3749830  | -1.2453163 |
| C | 3.2171597  | 0.9931744  | -1.3261158 |
| C | 3.8704465  | 1.3897346  | -0.1727818 |
| C | 3.2686032  | 1.1587742  | 1.0515335  |
| C | 2.0338370  | 0.5374550  | 1.1112847  |
| H | 1.5745756  | 0.3776077  | 2.0715665  |
| H | 3.7625610  | 1.4673609  | 1.9574772  |
| H | 4.8299517  | 1.8733574  | -0.2273052 |
| H | 3.6713678  | 1.1698344  | -2.2865560 |
| H | 1.4803393  | 0.0851987  | -2.1526225 |

|   |           |            |            |
|---|-----------|------------|------------|
| H | 0.2546061 | -2.5913101 | -1.9391982 |
| H | 1.7946581 | -2.5033469 | -1.1139225 |
| H | 0.8106405 | -3.9467948 | -0.9655449 |

### Pinacolate-TS

E(BH-LYP-D3/def2-TZVP) = -1099.025365575 (conv)

Lowest Freq. = -896.03 cm<sup>-1</sup>

46

Pinacolate-TS (022TS/c2/bhlyp-d3.def2-TZVP\_COSMO\_37.5)

|   |            |            |            |
|---|------------|------------|------------|
| C | -0.6564785 | -3.0005433 | -0.8747872 |
| C | -0.7794705 | -2.2424978 | 0.4234856  |
| C | 0.2676163  | -2.6818946 | 1.4230925  |
| H | 0.2293719  | -3.7537263 | 1.6085124  |
| H | 0.1538775  | -2.1712806 | 2.3729072  |
| H | 1.2617200  | -2.4515226 | 1.0498467  |
| H | -1.8215241 | -2.5950082 | 0.9265420  |
| B | -1.0046554 | -0.6167409 | 0.2796865  |
| O | -1.7671748 | -0.2444239 | -0.9322710 |
| C | -3.0003646 | 0.3164247  | -0.5728653 |
| C | -4.0725036 | -0.7633035 | -0.6457595 |
| H | -3.8771354 | -1.5493886 | 0.0671373  |
| H | -4.0576709 | -1.1945223 | -1.6407281 |
| H | -5.0658644 | -0.3681922 | -0.4617781 |
| C | -3.3561306 | 1.4183745  | -1.5527225 |
| H | -4.2609721 | 1.9369084  | -1.2516255 |
| H | -2.5551755 | 2.1399112  | -1.6375385 |
| H | -3.5286681 | 0.9889355  | -2.5342455 |
| C | -2.7539076 | 0.8131611  | 0.8829525  |
| C | -2.1114378 | 2.1964234  | 0.9140146  |
| H | -1.2451943 | 2.2350589  | 0.2676867  |
| H | -1.7827110 | 2.4009765  | 1.9267918  |
| H | -2.8072455 | 2.9731859  | 0.6166724  |
| C | -3.9929413 | 0.8263567  | 1.7555572  |
| H | -4.3956207 | -0.1706094 | 1.8713854  |
| H | -3.7399559 | 1.2052307  | 2.7403941  |
| H | -4.7623756 | 1.4677723  | 1.3378373  |
| O | -1.8488532 | -0.1322561 | 1.3872946  |
| C | 0.4610969  | 0.0949521  | 0.2327009  |
| C | 1.1724515  | 0.2070172  | -0.9568696 |
| C | 2.4347900  | 0.7720531  | -1.0098887 |
| C | 3.0295593  | 1.2486680  | 0.1445627  |
| C | 2.3432378  | 1.1526387  | 1.3421648  |
| C | 1.0833302  | 0.5830531  | 1.3759857  |
| H | 0.5588946  | 0.5242894  | 2.3141780  |
| H | 2.7917728  | 1.5253975  | 2.2475068  |
| H | 4.0096719  | 1.6909393  | 0.1109766  |
| H | 2.9550157  | 0.8448794  | -1.9499683 |
| H | 0.7202337  | -0.1476899 | -1.8673465 |

|   |            |            |            |
|---|------------|------------|------------|
| H | -1.4722926 | -2.7625331 | -1.5461320 |
| H | 0.2698198  | -2.7272552 | -1.3783222 |
| H | -0.6315926 | -4.0780032 | -0.7221966 |
| C | -2.7742676 | -3.4386354 | 1.8222499  |
| F | -2.5907931 | -4.7193948 | 1.5144821  |
| F | -2.4014337 | -3.2683775 | 3.0828485  |
| F | -4.0773051 | -3.1912900 | 1.7490687  |

### Pinacolate-Rad

E(BH-LYP-D3/def2-TZVP) = -760.7868038024 (conv)

Lowest Freq. = 10.05 cm<sup>-1</sup>

41

Pinacolate-Rad (023/c1/bhlyp-d3.def2-TZVP\_COSMO\_37.5)

|   |            |            |            |
|---|------------|------------|------------|
| C | -1.1280064 | 1.7090216  | 2.1023087  |
| C | -0.4187744 | 0.4089065  | 1.9599634  |
| B | 0.6467509  | 0.1929762  | 0.7790708  |
| O | 1.5003552  | 1.3962061  | 0.6060386  |
| C | 2.8343763  | 0.9865040  | 0.4957260  |
| O | 1.6257265  | -0.8953427 | 1.0512418  |
| C | 2.8606408  | -0.3074745 | 1.3535463  |
| C | -0.1998303 | -0.1570202 | -0.5688200 |
| C | -0.6339282 | 0.8405576  | -1.4364517 |
| C | -1.4182322 | 0.5654237  | -2.5426441 |
| C | -1.7998946 | -0.7361165 | -2.8174022 |
| C | -1.3840944 | -1.7491996 | -1.9710762 |
| C | -0.6012052 | -1.4556410 | -0.8685698 |
| H | -2.0289493 | 1.7464928  | 1.4780052  |
| H | -1.4627798 | 1.8932492  | 3.1242584  |
| H | -0.4962301 | 2.5355210  | 1.7954967  |
| H | -0.3369189 | 1.8568848  | -1.2416014 |
| H | -1.7308577 | 1.3635032  | -3.1949573 |
| H | -2.4086004 | -0.9573298 | -3.6764358 |
| H | -1.6704113 | -2.7674465 | -2.1743105 |
| H | -0.2841723 | -2.2586723 | -0.2245723 |
| C | 3.9773455  | -1.2707789 | 1.0061273  |
| H | 3.8875158  | -1.6193538 | -0.0140266 |
| H | 3.9335220  | -2.1337421 | 1.6628779  |
| H | 4.9508286  | -0.8066930 | 1.1294424  |
| C | 2.9166731  | 0.0085850  | 2.8448225  |
| H | 2.1539720  | 0.7317759  | 3.1025513  |
| H | 3.8863386  | 0.3897162  | 3.1469988  |
| H | 2.7209212  | -0.9031971 | 3.3984730  |
| C | 3.7429658  | 2.0910982  | 0.9965212  |
| H | 3.4486316  | 2.4154129  | 1.9854741  |
| H | 3.6820500  | 2.9450242  | 0.3293097  |
| H | 4.7783383  | 1.7667298  | 1.0297086  |
| C | 3.1553300  | 0.6983943  | -0.9677328 |
| H | 2.9148422  | 1.5787266  | -1.5535166 |
| H | 2.5537604  | -0.1233796 | -1.3333730 |
| H | 4.2036436  | 0.4636731  | -1.1184582 |
| C | -1.0932567 | -0.7612945 | 2.5844997  |
| H | -0.4490303 | -1.6342118 | 2.5851137  |

|   |            |            |           |
|---|------------|------------|-----------|
| H | -2.0050357 | -1.0385470 | 2.0421770 |
| H | -1.4024346 | -0.5640896 | 3.6120305 |



## 5j-Anion

E(TPSS-D3/def2-TZVP) = -725.7302175552 (conv)

Lowest Freq. = 28.91 cm<sup>-1</sup>

45

5j-Anion (038/c4/bhlyp-d3.def2-TZVP\_COSMO\_37.5)

|   |            |            |            |
|---|------------|------------|------------|
| C | -0.7185142 | -3.0976769 | -0.8140655 |
| C | 0.2625168  | -1.9328765 | -0.8002171 |
| C | 0.5818046  | -1.5006019 | -2.2244781 |
| H | -0.3040223 | -1.1449073 | -2.7415003 |
| H | 0.9916994  | -2.3179331 | -2.8195639 |
| H | 1.3040407  | -0.6915289 | -2.2273272 |
| B | -0.1986184 | -0.7108200 | 0.2127656  |
| O | 0.6454443  | 0.5055044  | 0.0566667  |
| C | 1.6673142  | 0.5151415  | 1.0084764  |
| C | 2.9215709  | -0.1355549 | 0.4256443  |
| H | 3.7673429  | -0.0602757 | 1.1007147  |
| H | 2.7585898  | -1.1772860 | 0.1927991  |
| H | 3.1760935  | 0.3782909  | -0.4948839 |
| C | 2.0135957  | 1.9558311  | 1.3444675  |
| H | 2.4349050  | 2.4374500  | 0.4679386  |
| H | 2.7474696  | 2.0134819  | 2.1420597  |
| H | 1.1346257  | 2.5107381  | 1.6426363  |
| C | 1.0645665  | -0.2921026 | 2.2081301  |
| C | 0.3652116  | 0.6065973  | 3.2239168  |
| H | -0.1827543 | -0.0227322 | 3.9171677  |
| H | 1.0701967  | 1.2034032  | 3.7931581  |
| H | -0.3397222 | 1.2672401  | 2.7426097  |
| O | 0.1212805  | -1.1361867 | 1.6143925  |
| C | 2.0857931  | -1.1325881 | 2.9584005  |
| H | 1.5943248  | -1.6467046 | 3.7782518  |
| H | 2.8787674  | -0.5199907 | 3.3762886  |
| H | 2.5280880  | -1.8784682 | 2.3121722  |
| C | -1.7746176 | -0.3143581 | 0.0521876  |
| C | -2.3068392 | 0.7610845  | 0.9927995  |
| H | -1.6400433 | 1.6205357  | 0.9679510  |
| H | -2.3664727 | 0.4296231  | 2.0227145  |
| C | -3.6642548 | 1.1399617  | 0.4147241  |
| H | -4.3994983 | 0.3964521  | 0.7114777  |
| H | -4.0306966 | 2.1040190  | 0.7550638  |
| C | -3.4553213 | 1.0919631  | -1.1046866 |
| H | -3.3157030 | 2.0921808  | -1.5027921 |
| H | -4.3200341 | 0.6757125  | -1.6108698 |
| C | -2.1889543 | 0.2352973  | -1.3205923 |
| H | -1.3890345 | 0.8543329  | -1.7154743 |

|   |            |            |            |
|---|------------|------------|------------|
| H | -2.3559157 | -0.5530103 | -2.0456206 |
| H | -2.3731875 | -1.2093753 | 0.2396248  |
| H | 1.1884471  | -2.3204726 | -0.3746705 |
| H | -0.3348751 | -3.9557863 | -1.3670276 |
| H | -0.9450370 | -3.4321828 | 0.1946357  |
| H | -1.6594392 | -2.8141486 | -1.2785081 |

### 5m-Anion

E (TPSS-D3/def2-TZVP) = -765.0433373667 (conv)

Lowest Freq. = 46.88 cm<sup>-1</sup>

48

5m-Anion (037/c1/bhlyp-d3.def2-TZVP\_COSMO\_37.5)

|   |            |            |            |
|---|------------|------------|------------|
| C | -0.4632337 | 2.8595416  | -1.4501206 |
| C | 0.3434057  | 2.2069817  | -0.3344786 |
| C | 0.1775917  | 2.9955618  | 0.9585290  |
| H | 0.7582202  | 2.5515926  | 1.7590093  |
| H | -0.8561584 | 3.0214827  | 1.2884754  |
| H | 0.4993577  | 4.0320667  | 0.8467954  |
| B | 0.1059910  | 0.5683444  | -0.2187394 |
| O | 0.6482982  | 0.0058846  | 1.0475151  |
| C | 1.9515144  | -0.4588264 | 0.8575839  |
| C | 2.9528434  | 0.6440544  | 1.2011146  |
| H | 2.8504366  | 1.4966840  | 0.5466490  |
| H | 2.7617786  | 0.9754238  | 2.2158515  |
| H | 3.9765427  | 0.2893864  | 1.1487947  |
| C | 2.2034325  | -1.6134607 | 1.8128104  |
| H | 1.4482093  | -2.3803067 | 1.7089624  |
| H | 2.1725353  | -1.2463333 | 2.8335389  |
| H | 3.1782244  | -2.0614692 | 1.6487663  |
| C | 1.9853457  | -0.8643823 | -0.6568617 |
| C | 1.6691489  | -2.3415308 | -0.8740733 |
| H | 0.7634580  | -2.6312301 | -0.3636267 |
| H | 1.5248228  | -2.5085925 | -1.9362269 |
| H | 2.4781676  | -2.9813322 | -0.5377209 |
| O | 0.9838368  | -0.0845184 | -1.2467567 |
| C | 3.3129186  | -0.5753264 | -1.3404099 |
| H | 3.5399110  | 0.4820880  | -1.3253454 |
| H | 3.2581847  | -0.8926922 | -2.3768545 |
| H | 4.1307927  | -1.1122099 | -0.8699667 |
| C | -1.4601188 | 0.1203558  | -0.4042201 |
| C | -1.6418197 | -1.3900045 | -0.4973229 |
| H | -1.0513471 | -1.7726802 | -1.3212755 |
| C | -3.0910923 | -1.8237900 | -0.6587896 |
| C | -3.9623389 | -1.2700369 | 0.4550489  |
| C | -3.8304401 | 0.2403153  | 0.5378706  |
| C | -2.3775305 | 0.6703726  | 0.6855015  |
| H | -2.3324863 | 1.7527102  | 0.7028734  |
| H | -2.0066957 | 0.3351053  | 1.6542174  |
| H | -4.4276345 | 0.6245545  | 1.3621366  |
| H | -4.2380918 | 0.6788765  | -0.3725196 |
| H | -5.0009104 | -1.5557131 | 0.3086371  |

|   |            |            |            |
|---|------------|------------|------------|
| H | -3.6482153 | -1.7071776 | 1.4022720  |
| H | -3.1648904 | -2.9090718 | -0.6874389 |
| H | -3.4691745 | -1.4611466 | -1.6143956 |
| H | -1.2372830 | -1.8463914 | 0.4052048  |
| H | -1.8126099 | 0.5342228  | -1.3536448 |
| H | 1.3905621  | 2.3099161  | -0.6214705 |
| H | -1.5268931 | 2.8489311  | -1.2277857 |
| H | -0.1799042 | 3.9004723  | -1.6094072 |
| H | -0.3283727 | 2.3361981  | -2.3929235 |

### 5j-TS\_iPr

E(TPSS-D3/def2-TZVP) = -1063.315486138 (conv)

Lowest Freq. = -903.16 cm<sup>-1</sup>

49

5j-TS\_iPr (038TS1/c1a/bhlyp-d3.def2-TZVP\_COSMO\_37.5)

|   |            |            |            |
|---|------------|------------|------------|
| C | -0.4884846 | -3.2530355 | -0.6032375 |
| C | -0.8318207 | -2.3988750 | 0.5931306  |
| C | -0.0067270 | -2.7617822 | 1.8072793  |
| H | -0.0749746 | -3.8188375 | 2.0542093  |
| H | -0.3164411 | -2.1888577 | 2.6748804  |
| H | 1.0431117  | -2.5410590 | 1.6301964  |
| H | -1.9582936 | -2.7400045 | 0.8977551  |
| B | -0.9266945 | -0.7838365 | 0.3029377  |
| O | -1.7616184 | -0.4458657 | -0.8717037 |
| C | -2.9273983 | 0.2275956  | -0.4873939 |
| C | -4.0846001 | -0.7621543 | -0.4489327 |
| H | -3.9321344 | -1.5021938 | 0.3196609  |
| H | -4.1347944 | -1.2721050 | -1.4042783 |
| H | -5.0364073 | -0.2729995 | -0.2713269 |
| C | -3.2482679 | 1.2966466  | -1.5166125 |
| H | -4.0996115 | 1.8970008  | -1.2115791 |
| H | -2.4030967 | 1.9515935  | -1.6781297 |
| H | -3.4943273 | 0.8246929  | -2.4623781 |
| C | -2.5797122 | 0.7879232  | 0.9282630  |
| C | -1.9395427 | 2.1722557  | 0.8727090  |
| H | -1.1003583 | 2.1918194  | 0.1936153  |
| H | -1.5733442 | 2.4224292  | 1.8621068  |
| H | -2.6482585 | 2.9352320  | 0.5697764  |
| C | -3.7633572 | 0.8552412  | 1.8768552  |
| H | -4.1729291 | -0.1283616 | 2.0607275  |
| H | -3.4405738 | 1.2689254  | 2.8267142  |
| H | -4.5494272 | 1.4929003  | 1.4850193  |
| O | -1.6524805 | -0.1357867 | 1.4208931  |
| C | 0.6320674  | -0.2390301 | 0.0806108  |
| H | -1.1451270 | -3.0321633 | -1.4371765 |
| H | 0.5317630  | -3.0581778 | -0.9282444 |
| H | -0.5544913 | -4.3179554 | -0.3860652 |
| C | -3.0980246 | -3.6785213 | 1.3770679  |
| F | -2.5446092 | -4.7619973 | 1.9131987  |
| F | -3.8889805 | -3.1365536 | 2.2984999  |
| F | -3.8665461 | -4.0834031 | 0.3703721  |
| C | 1.2469813  | 0.5419859  | 1.2661678  |
| H | 1.9296713  | -0.0873425 | 1.8296271  |
| H | 0.4782814  | 0.8648295  | 1.9556697  |

|   |           |            |            |
|---|-----------|------------|------------|
| C | 0.8690320 | 0.6666521  | -1.1314024 |
| H | 0.0552953 | 1.3735012  | -1.2543283 |
| H | 0.9260161 | 0.1016940  | -2.0565644 |
| C | 2.1557328 | 1.4128888  | -0.8091968 |
| H | 2.3228801 | 2.2903811  | -1.4275840 |
| H | 3.0083474 | 0.7505270  | -0.9446061 |
| C | 1.9895526 | 1.7494940  | 0.6680467  |
| H | 2.9318296 | 1.9585100  | 1.1642669  |
| H | 1.3770927 | 2.6423029  | 0.7616554  |
| H | 1.2750164 | -1.1024931 | -0.0833126 |

### 5j-TS\_cPent

E(TPSS-D3/def2-TZVP) = -1063.316481635 (conv)

Lowest Freq. = -806.60 cm<sup>-1</sup>

49

5j-TS\_cPent (038TS2/c4a/bhlyp-d3.def2-TZVP\_COSMO\_37.5)

|   |            |            |            |
|---|------------|------------|------------|
| C | -0.6928212 | -3.1815739 | -0.2637927 |
| C | -1.1107778 | -2.2257121 | 0.8441411  |
| C | -0.3845426 | -2.5707516 | 2.1370460  |
| H | -0.5891831 | -3.5923413 | 2.4575218  |
| H | -0.6773278 | -1.9073983 | 2.9454547  |
| H | 0.6912336  | -2.4852184 | 2.0233012  |
| H | -2.1695023 | -2.4065959 | 1.0309804  |
| B | -1.0277579 | -0.6420680 | 0.4137881  |
| O | -1.5727833 | -0.4051897 | -0.9445308 |
| C | -2.8808929 | 0.0854616  | -0.8685553 |
| C | -3.8677082 | -1.0778440 | -0.9401490 |
| H | -3.7542518 | -1.7447330 | -0.0977168 |
| H | -3.6672339 | -1.6412258 | -1.8448066 |
| H | -4.8962592 | -0.7355799 | -0.9742725 |
| C | -3.1396361 | 0.9911390  | -2.0592821 |
| H | -4.1178871 | 1.4570740  | -1.9969907 |
| H | -2.3912675 | 1.7683966  | -2.1319577 |
| H | -3.1062579 | 0.4049200  | -2.9718043 |
| C | -2.9142644 | 0.8197911  | 0.5103839  |
| C | -2.5070969 | 2.2859574  | 0.4068038  |
| H | -1.5712834 | 2.3971310  | -0.1196745 |
| H | -2.3753139 | 2.6756368  | 1.4100528  |
| H | -3.2598869 | 2.8846172  | -0.0947366 |
| C | -4.2610633 | 0.7566212  | 1.2107222  |
| H | -4.5427257 | -0.2650462 | 1.4258743  |
| H | -4.2037040 | 1.2957416  | 2.1507708  |
| H | -5.0423171 | 1.2133311  | 0.6111912  |
| O | -1.9662935 | 0.1333797  | 1.2773307  |
| H | -1.2694247 | -3.0019117 | -1.1639960 |
| H | 0.3538915  | -3.0617712 | -0.5244664 |
| H | -0.8289297 | -4.2249480 | 0.0217228  |
| C | 2.5875345  | -1.6133839 | -0.2291815 |
| F | 2.8639592  | -2.6473664 | 0.5538318  |
| F | 2.5153392  | -2.0501055 | -1.4799300 |
| F | 3.6022265  | -0.7631440 | -0.1533517 |
| C | 0.4999177  | 0.0028309  | 0.5116401  |
| H | 1.2566203  | -0.8653391 | 0.1796165  |
| C | 0.9750069  | 0.4262523  | 1.9041256  |
| H | 1.4322579  | -0.3839490 | 2.4598480  |

|   |           |           |            |
|---|-----------|-----------|------------|
| C | 0.8500456 | 1.1816106 | -0.4090096 |
| H | 1.6560259 | 0.9103830 | -1.0873836 |
| H | 0.0105742 | 1.4557758 | -1.0328948 |
| H | 0.1078978 | 0.7503116 | 2.4725486  |
| C | 1.9228344 | 1.6020461 | 1.6949925  |
| H | 2.9159226 | 1.2412825 | 1.4420679  |
| H | 2.0177348 | 2.2360758 | 2.5709160  |
| C | 1.3169026 | 2.3195953 | 0.4987581  |
| H | 0.4625898 | 2.9044555 | 0.8268202  |
| H | 2.0077233 | 2.9979822 | 0.0088797  |



### 5m-TS\_iPr

E(TPSS-D3/def2-TZVP) = -1102.629239442 (conv)

Lowest Freq. = -896.07 cm<sup>-1</sup>

52

5m-TS\_iPr (037TS1/c2/bhlyp-d3.def2-TZVP\_COSMO\_37.5)

|   |            |            |            |
|---|------------|------------|------------|
| C | -1.9371069 | -2.9752367 | 1.3285185  |
| C | -0.6678092 | -2.2876381 | 0.8856719  |
| C | 0.0265389  | -3.0459043 | -0.2236166 |
| H | 0.1950758  | -4.0891704 | 0.0334116  |
| H | 0.9844073  | -2.5979914 | -0.4661620 |
| H | -0.5773797 | -3.0326807 | -1.1274287 |
| H | 0.0900638  | -2.4099291 | 1.8286710  |
| B | -0.8058066 | -0.6635310 | 0.6400325  |
| O | -1.4801761 | 0.0305691  | 1.7582500  |
| C | -0.5917112 | 0.8577450  | 2.4532051  |
| C | -0.1173926 | 0.1388702  | 3.7097145  |
| H | 0.4653723  | -0.7319100 | 3.4591455  |
| H | -0.9865760 | -0.1862021 | 4.2702353  |
| H | 0.4810345  | 0.7807628  | 4.3474066  |
| C | -1.3196452 | 2.1216127  | 2.8762743  |
| H | -0.6443149 | 2.8311620  | 3.3440484  |
| H | -1.7955357 | 2.5999209  | 2.0313240  |
| H | -2.0899796 | 1.8687848  | 3.5977459  |
| C | 0.5658686  | 1.0990021  | 1.4317598  |
| C | 0.3296870  | 2.3280628  | 0.5591328  |
| H | -0.6470705 | 2.3019028  | 0.0990925  |
| H | 1.0725341  | 2.3383981  | -0.2306283 |
| H | 0.4217717  | 3.2494086  | 1.1237968  |
| C | 1.9378078  | 1.2336716  | 2.0690567  |
| H | 2.2156366  | 0.3293630  | 2.5925661  |
| H | 2.6772566  | 1.4162890  | 1.2960293  |
| H | 1.9716619  | 2.0649676  | 2.7661272  |
| O | 0.5446899  | -0.0517624 | 0.6365446  |
| H | -2.3691941 | -2.4726564 | 2.1861753  |
| H | -2.6766298 | -2.9560725 | 0.5302061  |
| H | -1.7748385 | -4.0206205 | 1.5864161  |
| C | 0.9821269  | -3.1446432 | 2.8706329  |
| F | 1.1868017  | -4.3866375 | 2.4421976  |
| F | 2.1749902  | -2.5841844 | 3.0515546  |
| F | 0.3906193  | -3.2293276 | 4.0588993  |
| C | -1.6566508 | -0.4618605 | -0.7786614 |
| H | -2.1200948 | -1.4188288 | -1.0317401 |
| C | -0.7689617 | -0.1040156 | -1.9669798 |
| H | 0.0318021  | -0.8307448 | -2.0664722 |

|   |            |            |            |
|---|------------|------------|------------|
| C | -2.8153906 | 0.5262318  | -0.6888544 |
| H | -3.4749288 | 0.2398897  | 0.1234159  |
| H | -2.4418246 | 1.5135848  | -0.4275624 |
| H | -0.2827797 | 0.8485392  | -1.7742349 |
| C | -1.5435312 | -0.0072811 | -3.2735350 |
| H | -1.9417447 | -0.9893035 | -3.5270359 |
| H | -0.8854117 | 0.2821444  | -4.0901335 |
| C | -3.6005393 | 0.6282719  | -1.9889031 |
| H | -4.3963896 | 1.3649181  | -1.9002387 |
| H | -4.0823482 | -0.3281599 | -2.1895846 |
| C | -2.6956872 | 0.9776110  | -3.1592818 |
| H | -2.2917095 | 1.9779756  | -3.0081407 |
| H | -3.2647220 | 1.0081535  | -4.0849470 |

### 5m-TS\_cHex

E (TPSS-D3/def2-TZVP) = -1102.625792651 (conv)

Lowest Freq. = -905.29 cm<sup>-1</sup>

52

5m-TS\_cHex (037TS2/c2a/bhlyp-d3.def2-TZVP\_COSMO\_37.5)

|   |            |            |            |
|---|------------|------------|------------|
| C | -3.2185287 | 0.7666502  | 0.2230236  |
| C | -2.0020013 | 0.4510709  | 1.0831045  |
| C | -2.4445560 | 0.0748365  | 2.4914642  |
| H | -3.0416087 | 0.8620595  | 2.9532684  |
| H | -1.5970777 | -0.1188070 | 3.1402632  |
| H | -3.0449100 | -0.8280371 | 2.4829432  |
| H | -1.4638405 | 1.3947166  | 1.1747077  |
| B | -0.9503070 | -0.6645431 | 0.4086673  |
| O | -1.0038314 | -2.0056455 | 1.0309092  |
| C | -1.7126886 | -2.9019378 | 0.2232728  |
| C | -3.1594204 | -2.9879509 | 0.7019479  |
| H | -3.6659727 | -2.0389884 | 0.6146448  |
| H | -3.1585353 | -3.2713475 | 1.7485356  |
| H | -3.7237506 | -3.7315529 | 0.1500663  |
| C | -1.1005353 | -4.2849037 | 0.3697918  |
| H | -1.5755821 | -5.0006894 | -0.2934612 |
| H | -0.0405237 | -4.2678130 | 0.1633672  |
| H | -1.2405771 | -4.6312164 | 1.3887307  |
| C | -1.5807925 | -2.2947881 | -1.2170981 |
| C | -0.4261823 | -2.8929126 | -2.0102290 |
| H | 0.4921777  | -2.8572230 | -1.4494510 |
| H | -0.2913520 | -2.3069136 | -2.9124718 |
| H | -0.6156829 | -3.9218233 | -2.2972244 |
| C | -2.8395318 | -2.4281280 | -2.0598686 |
| H | -3.6735736 | -1.9100780 | -1.6079074 |
| H | -2.6621440 | -1.9899475 | -3.0366405 |
| H | -3.1128485 | -3.4684528 | -2.2053599 |
| O | -1.3197243 | -0.9386753 | -0.9962795 |
| H | -2.9227597 | 1.1098855  | -0.7614133 |
| H | -3.8474083 | -0.1041796 | 0.0714376  |
| H | -3.8410031 | 1.5382494  | 0.6780336  |
| C | 2.5075949  | -1.9012232 | -0.1087591 |
| F | 2.2647466  | -3.1732067 | 0.1906735  |
| F | 2.7530777  | -1.8317777 | -1.4142866 |
| F | 3.6301272  | -1.5603389 | 0.5191933  |
| C | 0.5706698  | -0.0358791 | 0.5474760  |
| H | 1.3199997  | -0.9560299 | 0.2450629  |
| C | 0.9854748  | 0.3439315  | 1.9585527  |
| H | 0.9335387  | -0.5313043 | 2.6004279  |

|   |           |           |            |
|---|-----------|-----------|------------|
| C | 0.8658639 | 1.0626655 | -0.4531350 |
| H | 0.7166209 | 0.6768804 | -1.4559721 |
| H | 0.1207440 | 1.8488773 | -0.3193672 |
| H | 0.2469100 | 1.0427380 | 2.3462986  |
| C | 2.3527385 | 1.0051202 | 2.0819591  |
| H | 3.1352497 | 0.2784740 | 1.8919615  |
| H | 2.4971343 | 1.3586194 | 3.0997430  |
| C | 2.2462991 | 1.6890151 | -0.3201208 |
| H | 2.3478281 | 2.5196392 | -1.0137881 |
| H | 3.0062583 | 0.9609696 | -0.5961149 |
| C | 2.5029978 | 2.1562212 | 1.1021454  |
| H | 1.7886119 | 2.9392174 | 1.3535690  |
| H | 3.4926246 | 2.5966573 | 1.1854222  |

## 8. References

- S1 Tan, P. W.; Haughey, M.; Dixon, D. J. *Chem. Commun.* **2015**, 51, 4406.
- S2 Gerleve, C.; Kischewitz, M.; Studer, A. *Angew. Chem. Int. Ed.* **2018**, 57, 2441.
- S3 Sakamoto, Y.; Suzuki, T. *J. Am. Chem. Soc.* **2013**, 135, 14074.
- S4 Zhang, K.-F.; Christoffel, F.; Baudoin, O. *Angew. Chem. Int. Ed.* **2018**, 57, 1982.
- S5 Newby, J. A.; Huck, L.; Blaylock, D. W.; Witt, P. M.; Ley, S. V.; Browne, D. L. *Chem. Eur. J.* **2014**, 20, 263.
- S6 Zhu, W.; Ma, D. *Org. Lett.* **2006**, 8, 261.
- S7 Vinogradova, E. V.; Park, N. H.; Fors, B. P.; Buchwald, S. L. *Org. Lett.* **2013**, 15, 1394.
- S8 Miller, D. K. *Tetrahedron Lett.* **2013**, 54, 811.
- S9 Bose, S. K.; Brand, S.; Omoregie, H. O.; Haehnel, M.; Maier, J.; Bringmann, G.; Marder, T. B. *ACS Cat.* **2016**, 6, 8332.
- S10 Varela, A.; Garve, L. K.; Leonori, D.; Aggarwal, V. K. *Angew. Chem. Int. Ed.* **2017**, 56, 2127.
- S11 Pratsch, G.; Lackner, G. L.; Overman, L. E. *J. Org. Chem.* **2015**, 80, 6025.
- S12 Fawcett, A.; Pradeilles, J.; Wang, Y.; Mutsuga, T.; Myers, E. L.; Aggarwal, V. K. *Science* **2017**, 357, 283.
- S13 Li, C.; Wang, J.; Barton, L. M.; Yu, S.; Tian, M.; Peters, D. S.; Kumar, M.; Yu, A. W.; Johnson, K. A.; Chatterjee, A. K.; Yan, M.; Baran, P. S. *Science* **2017**, 356, eaam7355.
- S14 Thommen, C.; Jana, C. K.; Neuburger, M.; Gademann, K. *Org. Lett.* **2013**, 15, 1390.
- S15 Yang, C. T.; Zhang, Z. Q.; Tajuddin, H.; Wu, C. C.; Liang, J.; Liu, J. H.; Fu, Y.; Czyzewska, M.; Steel, P. G.; Marder, T. B.; Liu, L. *Angew. Chem. Int. Ed.* **2012**, 51, 528.

- S16 Pulis, A. P.; Blair, D. J.; Torres, E.; Aggarwal, V. K. *J. Am. Chem. Soc.* **2013**, *135*, 16054.
- S17 Kischkewitz, M.; Okamoto, K.; Mück-Lichtenfeld, C.; Studer, A. *Science* **2017**, *355*, 936.
- S18 Wang, B.; Du, H.; Zhang, J. *Steroids* **2011**, *76*, 204.
- S19 Bonet, A.; Odachowski, M.; Leonori, D.; Essafi, S.; Aggarwal, V. K. *Nat. Chem.* **2014**, *6*, 584.
- S20 Woźniak, Ł.; Murphy, J. J.; Melchiorre, P. *J. Am. Chem. Soc.* **2015**, *137*, 5678.
- S21 Schwarz, J. L.; Schafers, F.; Tlahuext-Aca, A.; Luckemeier, L.; Glorius, F. *J. Am. Chem. Soc.* **2018**, *140*, 12705.
- S22 Kandukuri, S. R.; Bahamonde, A.; Chatterjee, I.; Jurberg, I. D.; Escudero-Adán, E. C.; Melchiorre, P. *Angew. Chem. Int. Ed.* **2015**, *54*, 1485.
- S23 Prier, C. K.; Rankic, D. A.; MacMillan, D. W. *Chem. Rev.* **2013**, *113*, 5322.
- S24 Andrieux, C. P.; Gelis, L.; Medebielle, M.; Pinson, J.; Saveant, J. M. *J. Am. Chem. Soc.* **1990**, *112*, 3509.
- S25 Silvi, M.; Sandford, C.; Aggarwal, V. K. *J. Am. Chem. Soc.* **2017**, *139*, 5736.
- S26 Lovinger, G. J.; Morken, J. P. *J. Am. Chem. Soc.* **2017**, *139*, 17293.
- S27 Shu, C.; Noble, A.; Aggarwal, V. K. *Angew. Chem. Int. Ed.* **2019**, *58*, 3870-3874.
- S28 Becke, A. D. *J. Chem. Phys.* **1993**, *98*, 1372.
- S29 Lee, C.; Yang, W.; Parr, R.G. *Phys. Rev. B* **1988**, *37*, 785.
- S30 Grimme, S.; Antony, J.; Ehrlich, S.; Krieg, H. *J. Chem. Phys.* **2010**, *132*, 154104.
- S31 Grimme, S.; Ehrlich, S.; Goerigk, L. *J. Comput. Chem.* **2011**, *32*, 1456.
- S32 Weigend, F.; Ahlrichs, R.; *Phys. Chem. Chem. Phys.* **2005**, *7*, 3297.
- S33 Klamt, A.; Schüürmann, G. *J. Chem. Soc. Perkin Trans.* **1993**, *2*, 799.
- S34 Grimme, S. *Chem. Eur. J.* **2012**, *18*, 9955.
- S35 Goerigk, L.; Grimme, S. *J. Chem. Theory Comput.* **2011**, *7*, 291.
- S36 Barone, V.; Cozzi, M. *J. Phys. Chem. A* **1998**, *102*, 1995.
- S37 TURBOMOLE V7.2 2018, a Development of University of Karlsruhe and Forschungszentrum Karlsruhe GmbH, 1989-2007, TURBOMOLE GmbH, since 2007; available from <http://www.turbomole.com>.
- S38 Neese, F. *WIREs Comput. Mol. Sci.* **2012**, *2*, 73.

## 9. NMR Spectra of New Compounds

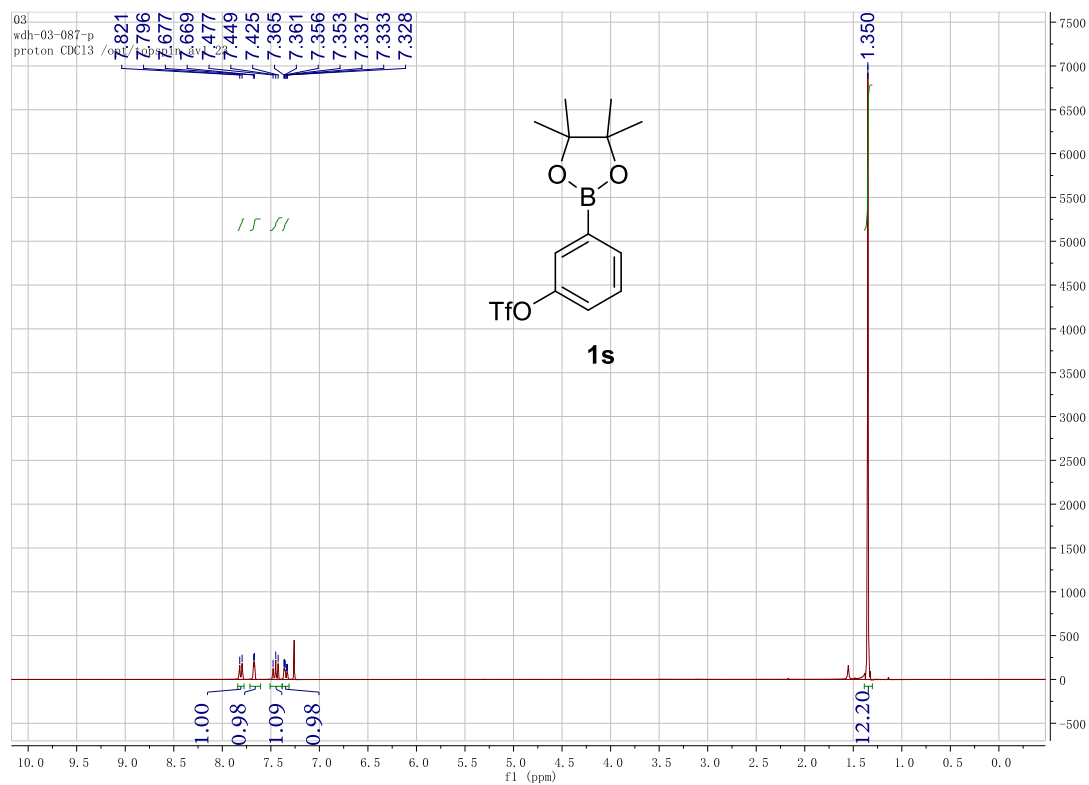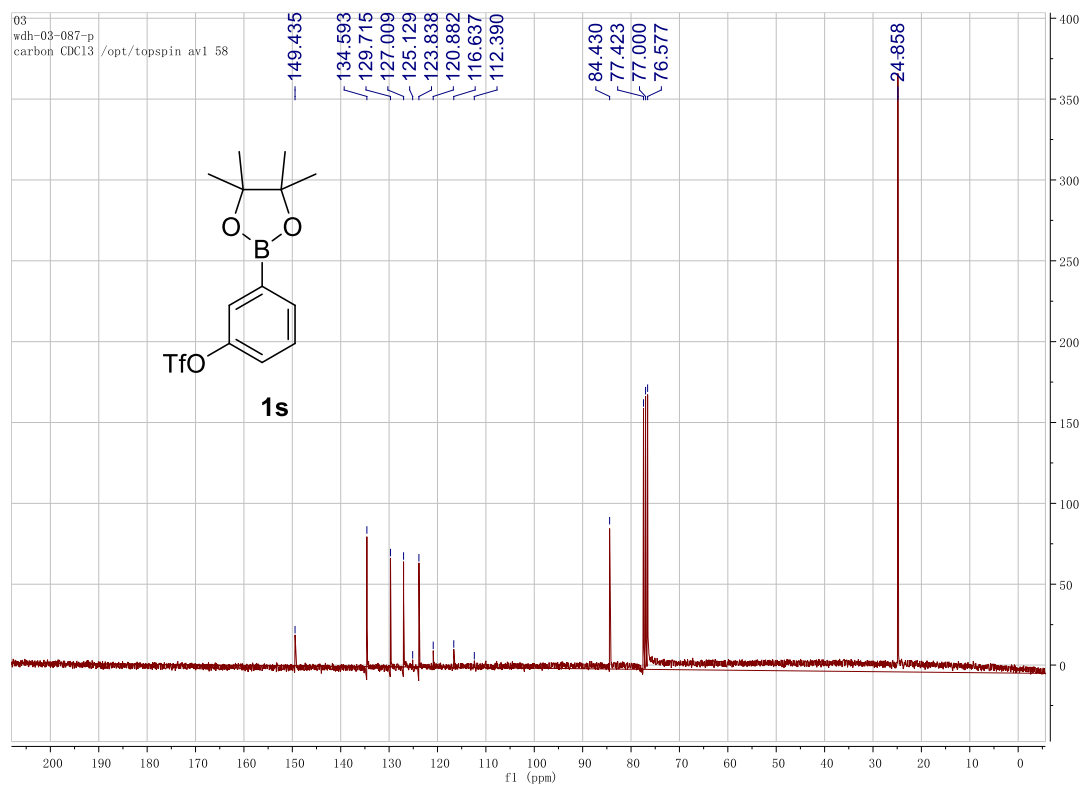

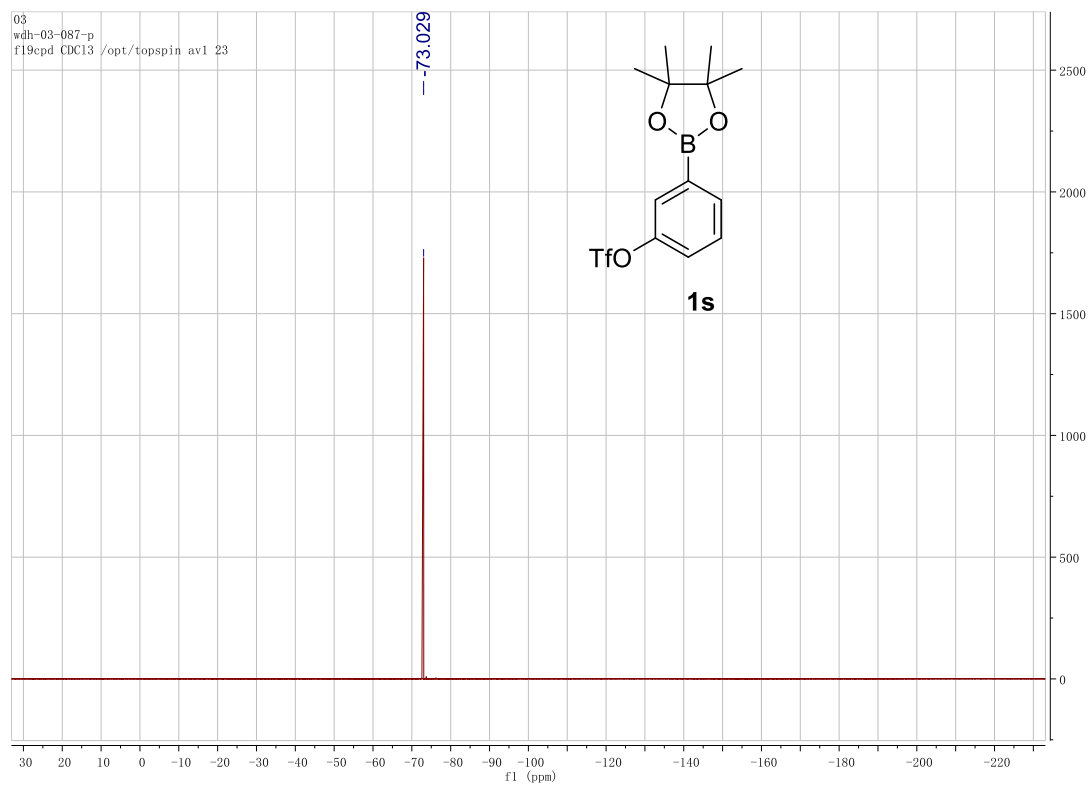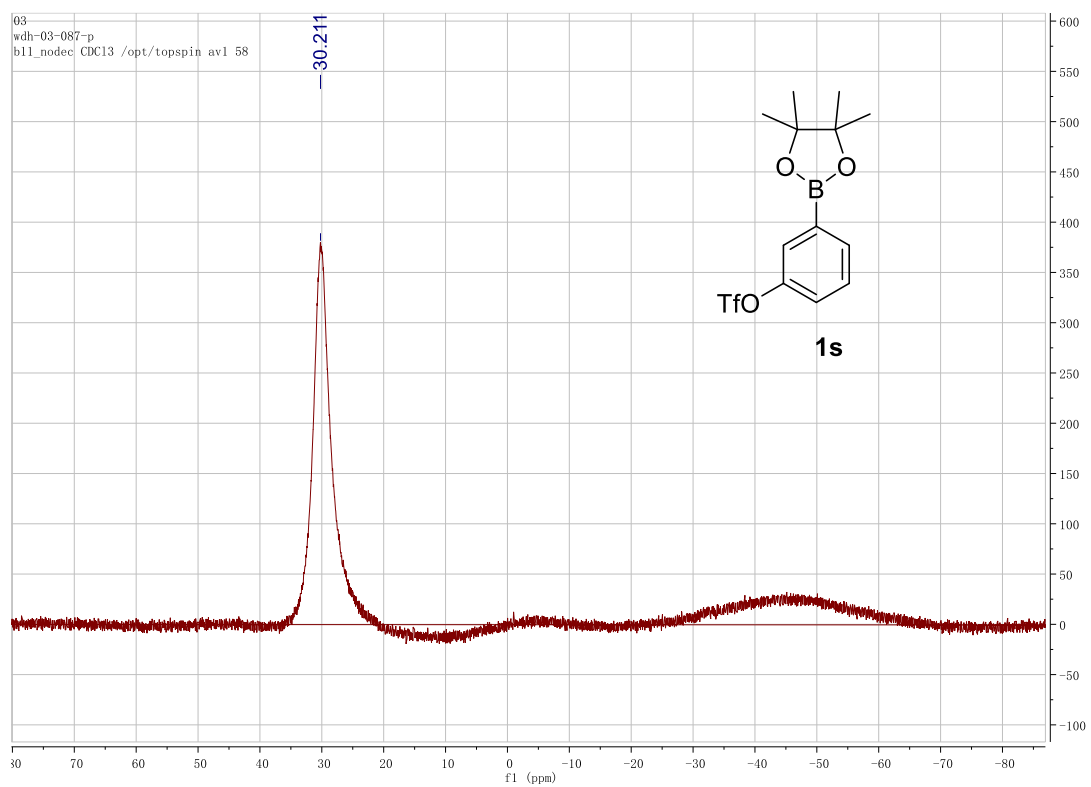

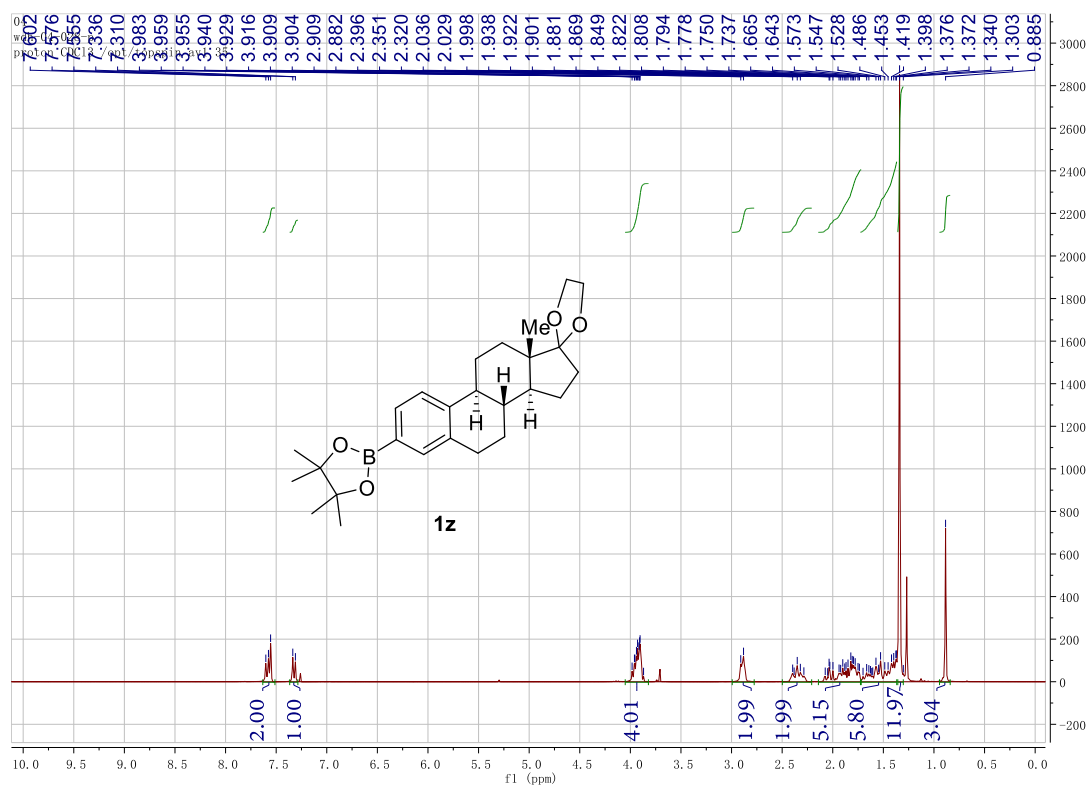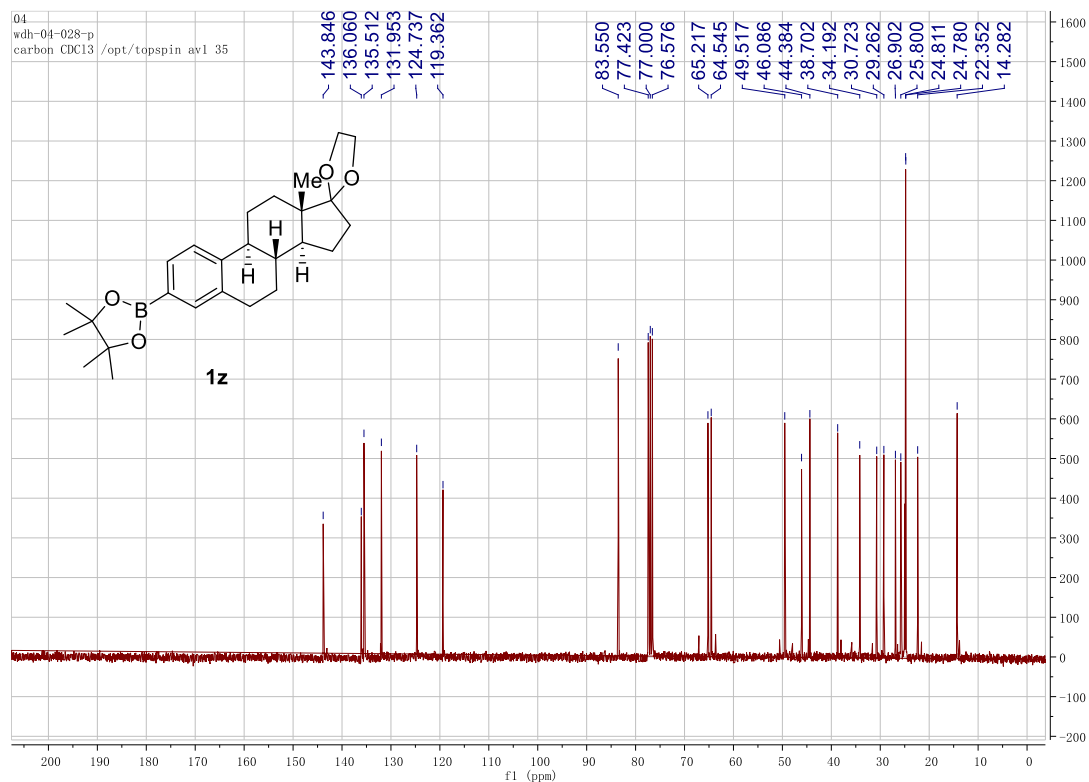



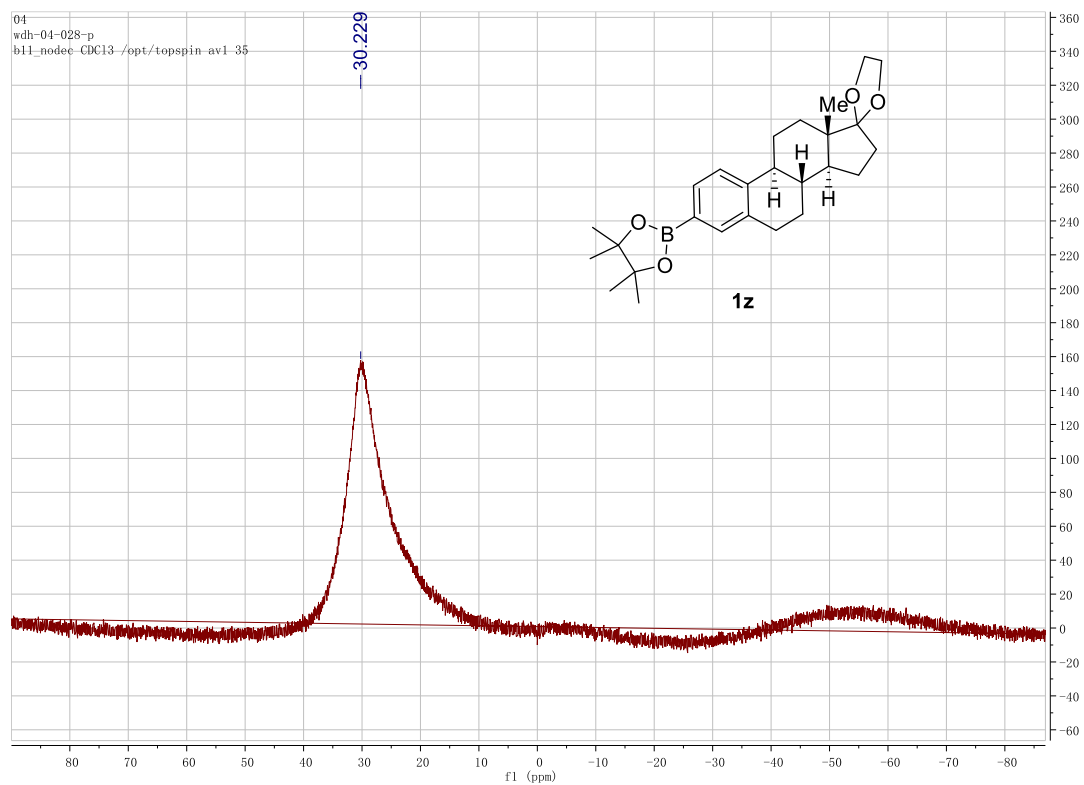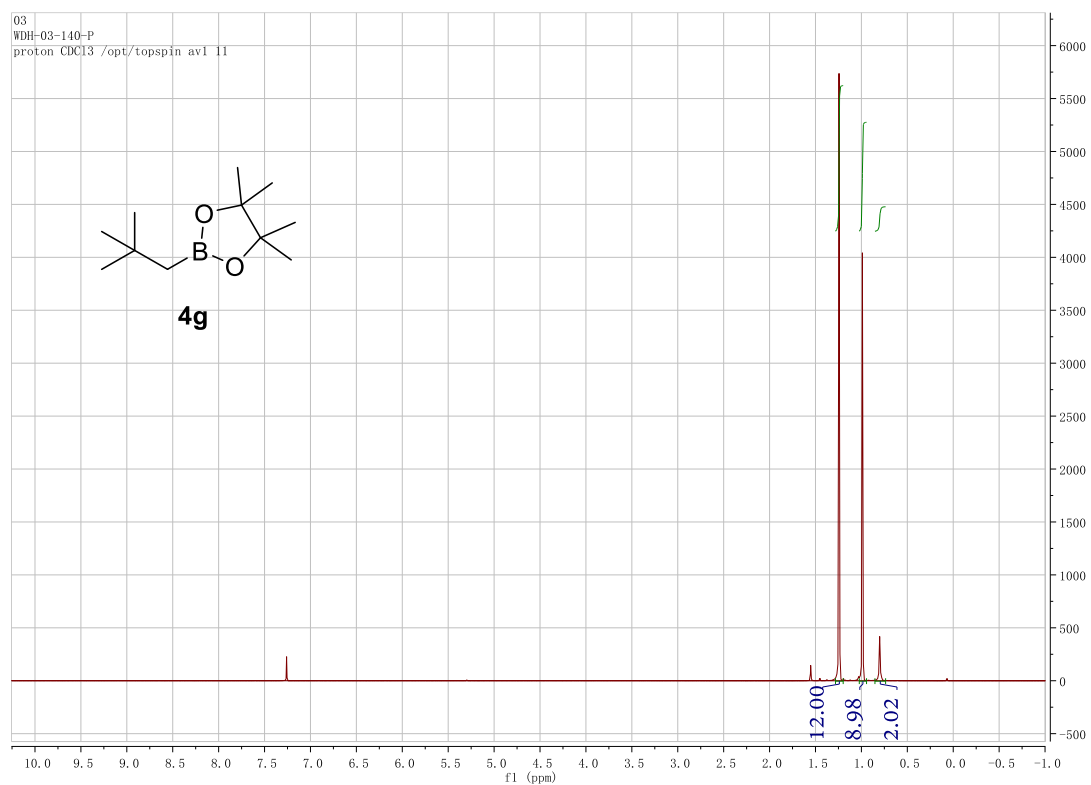

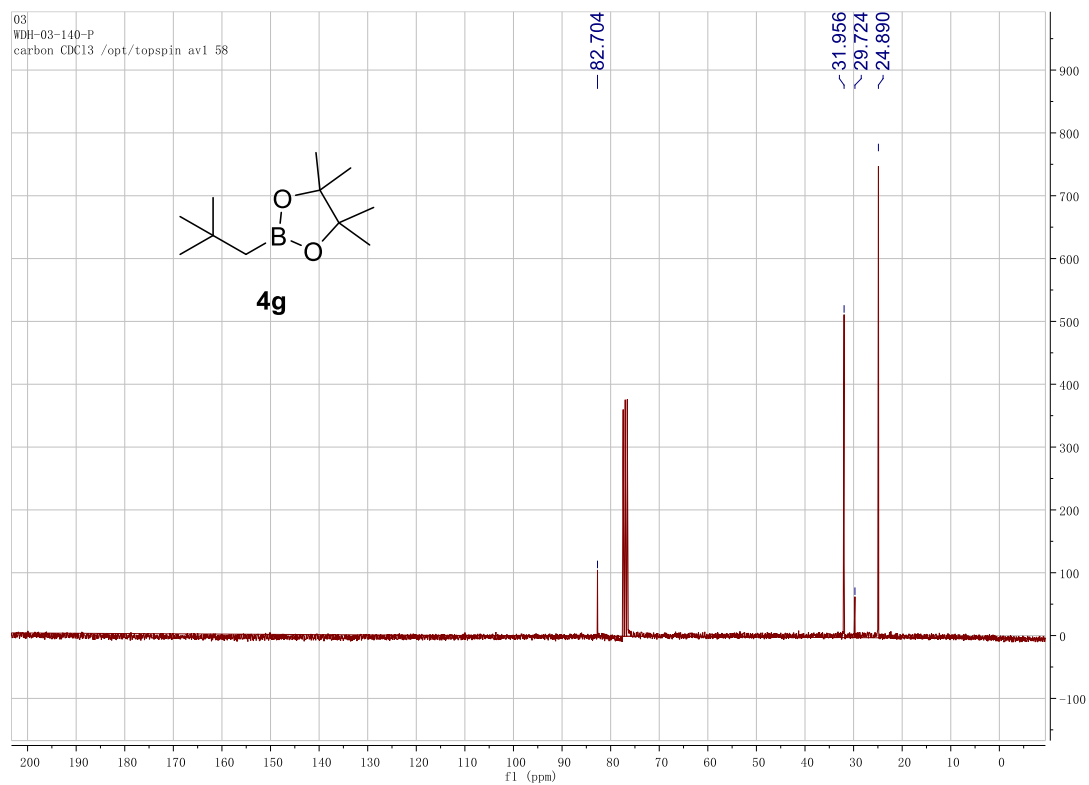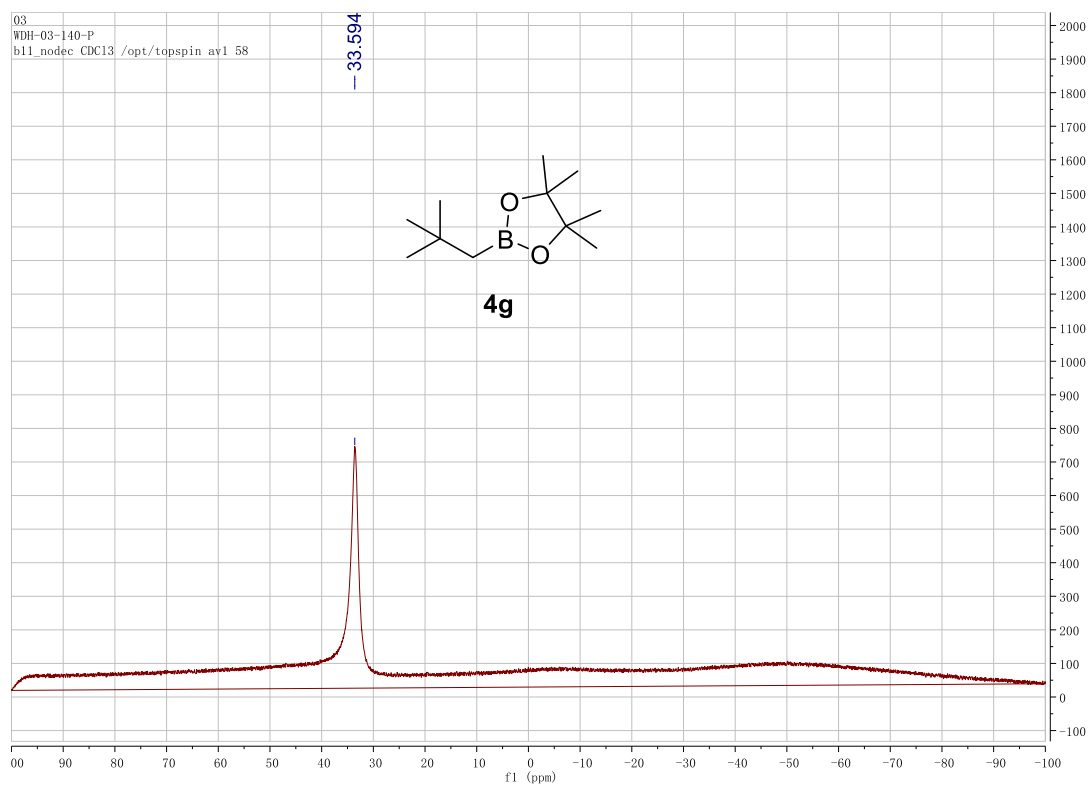

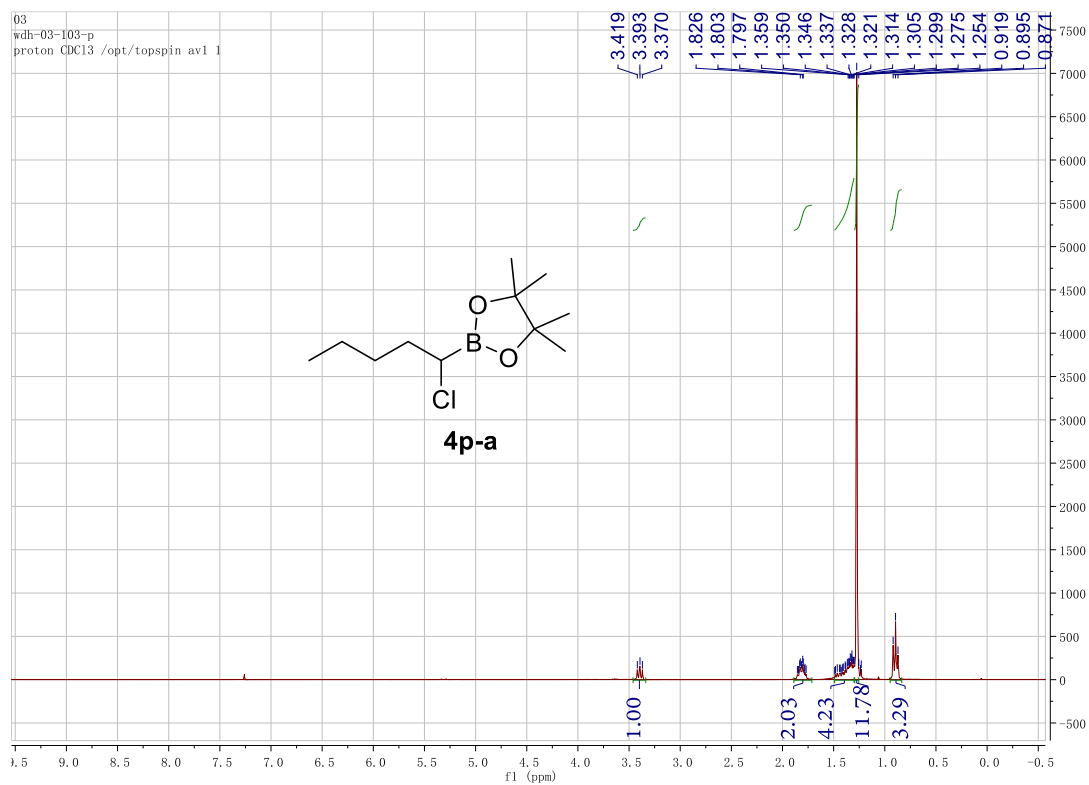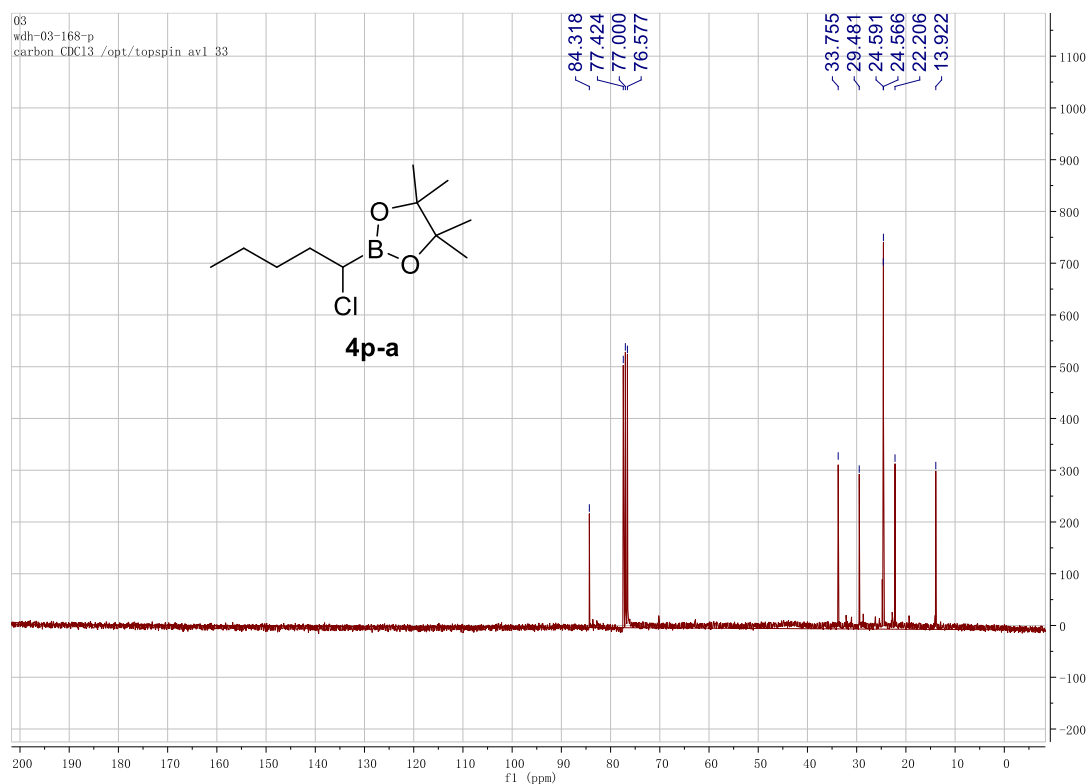

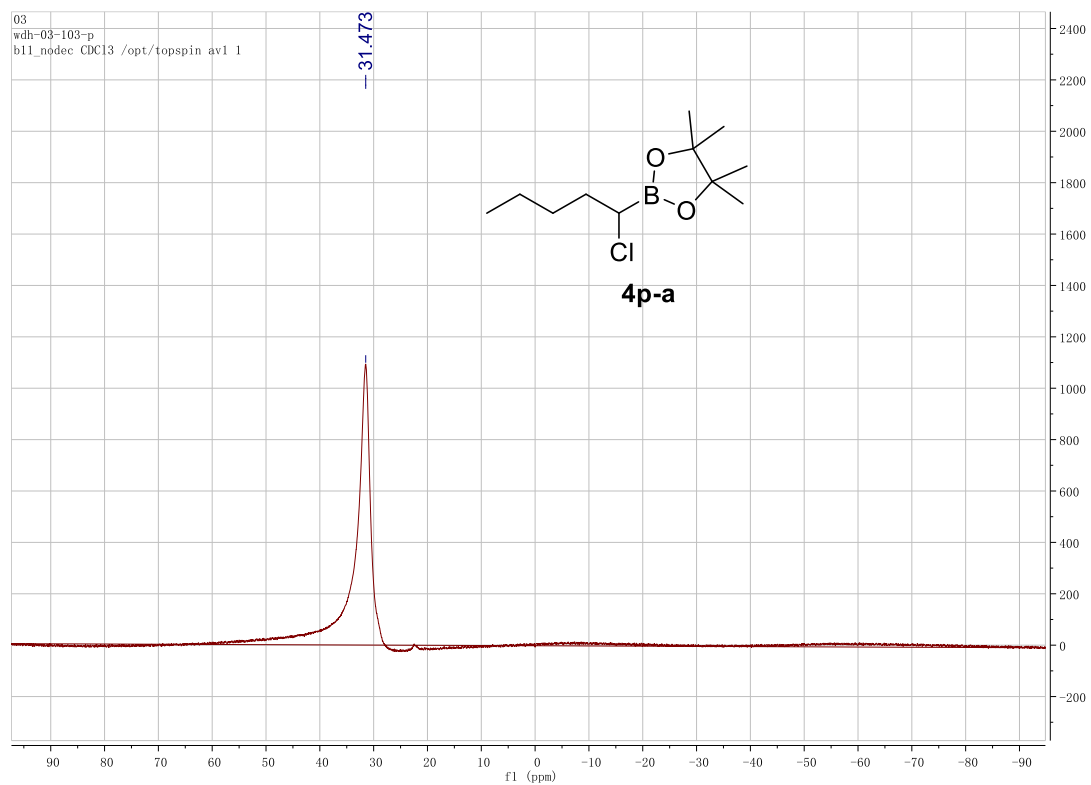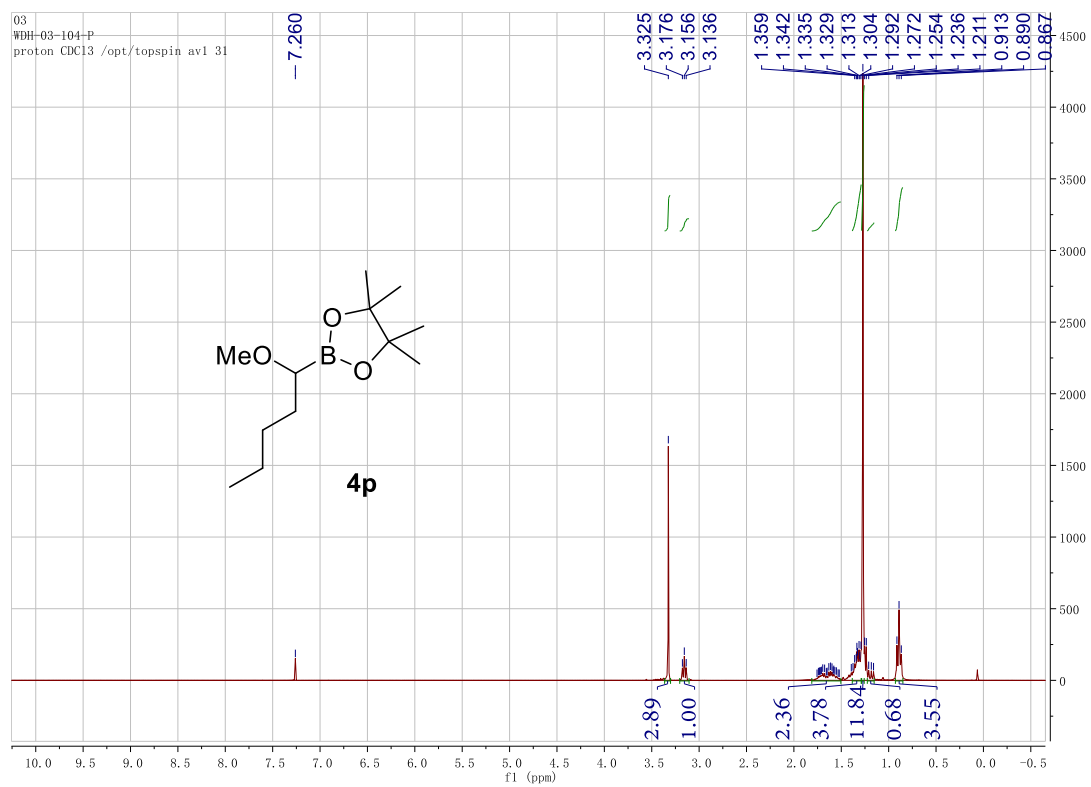

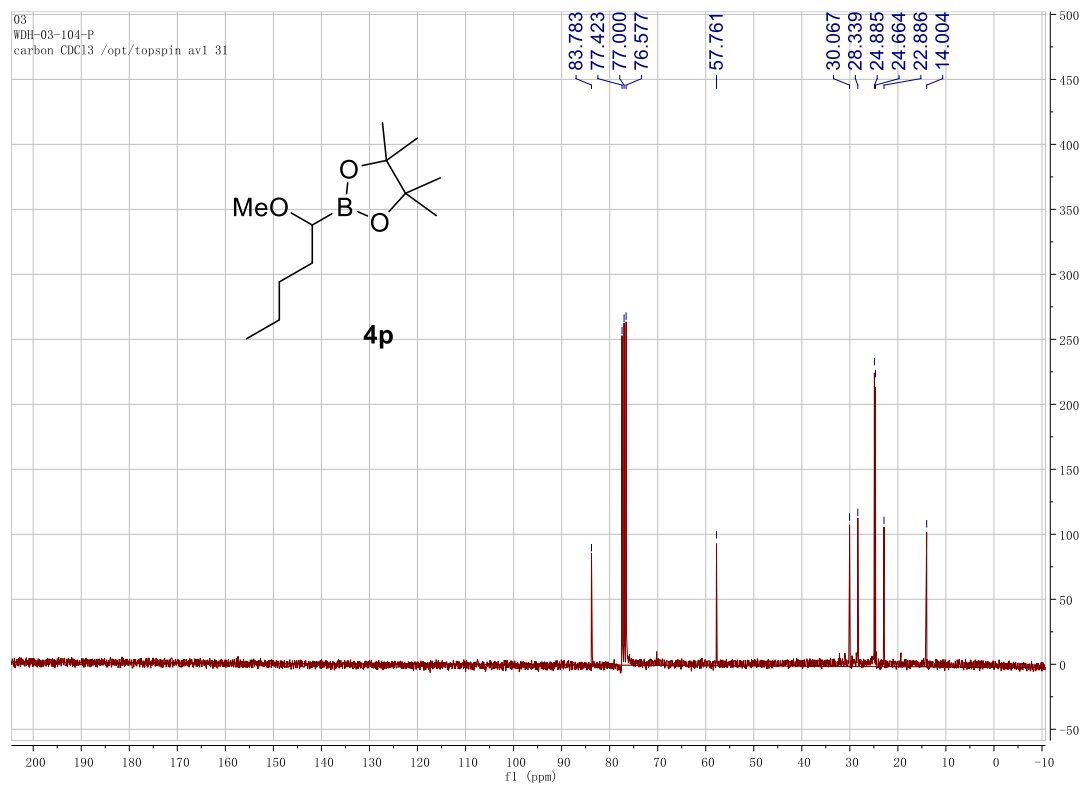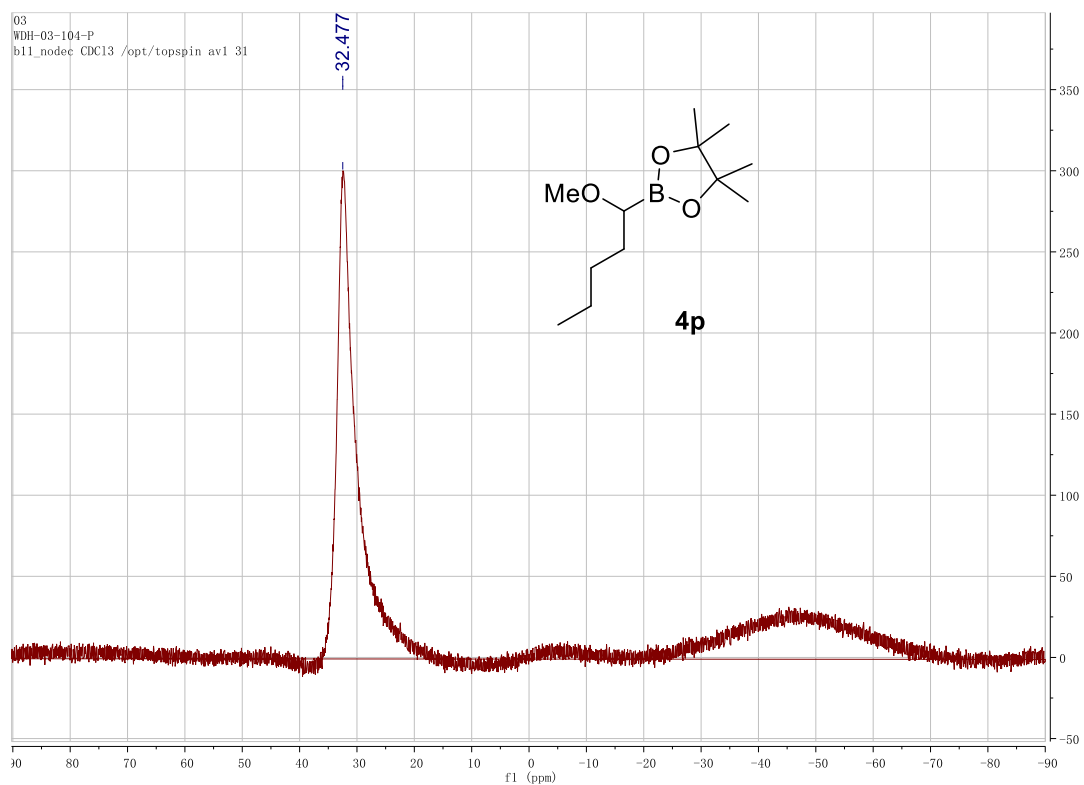

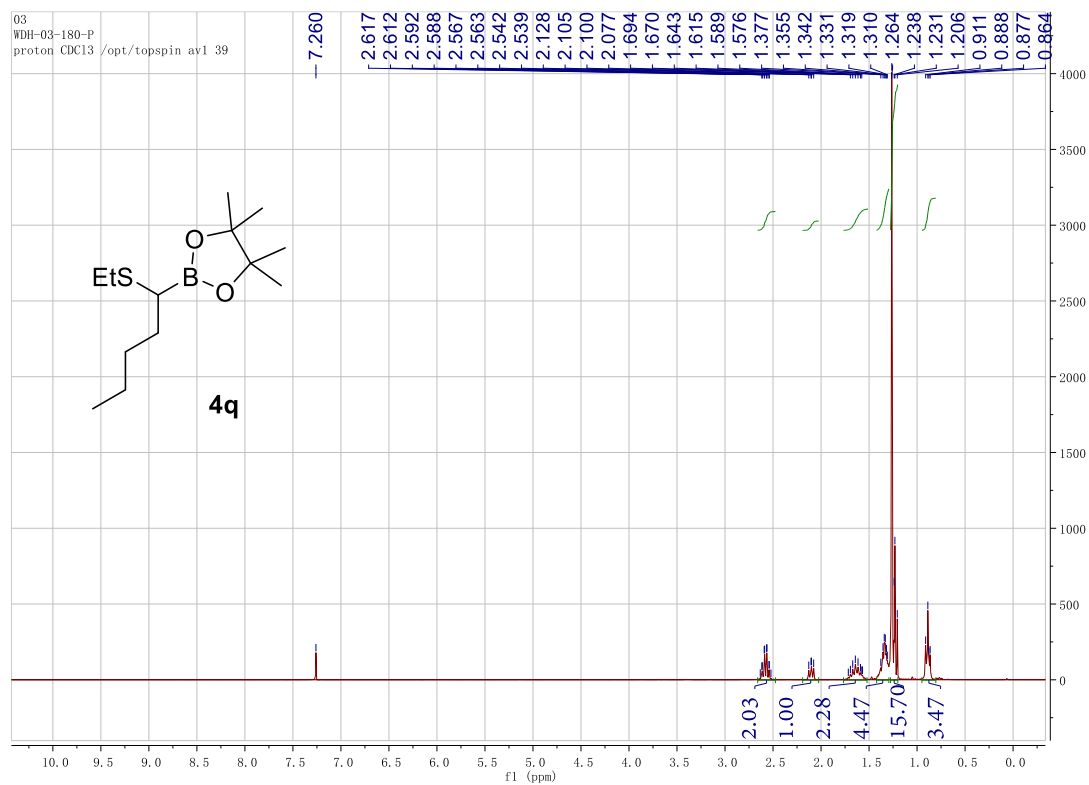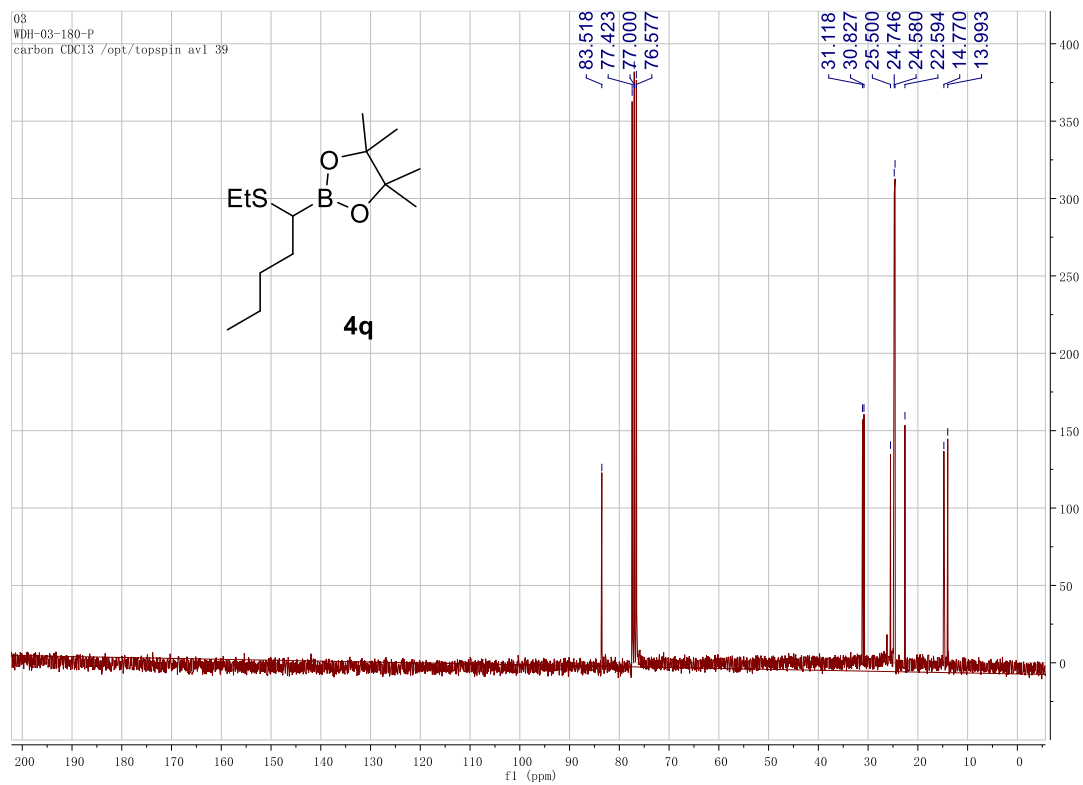

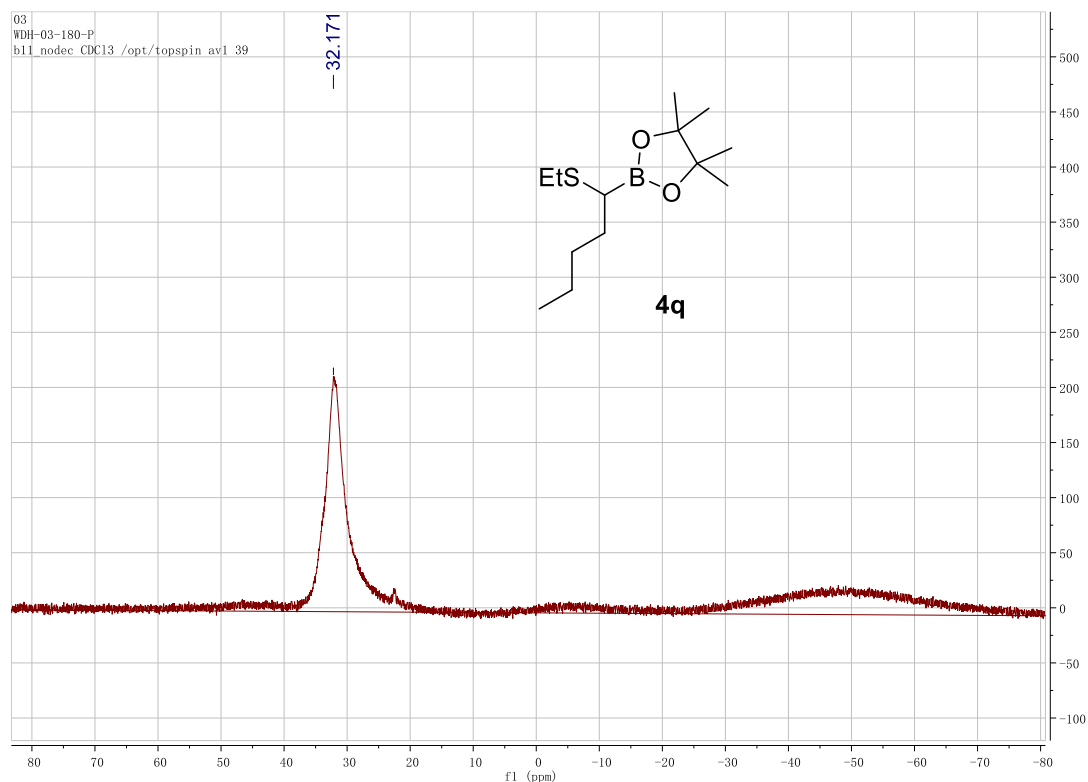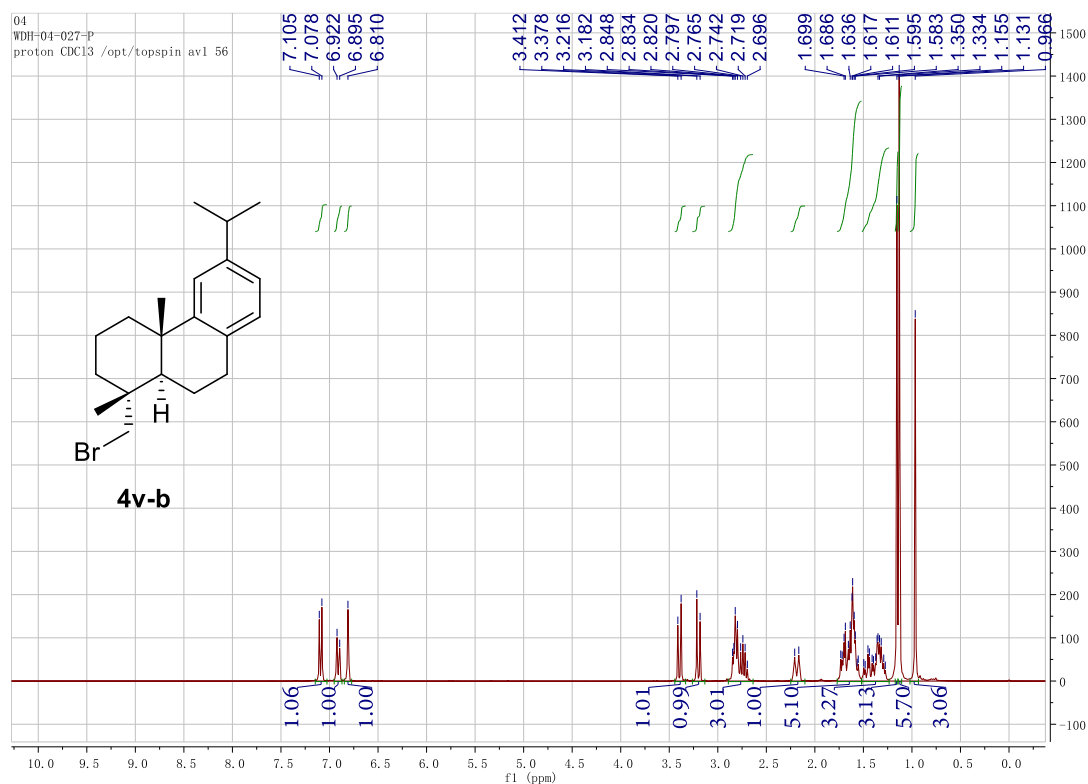

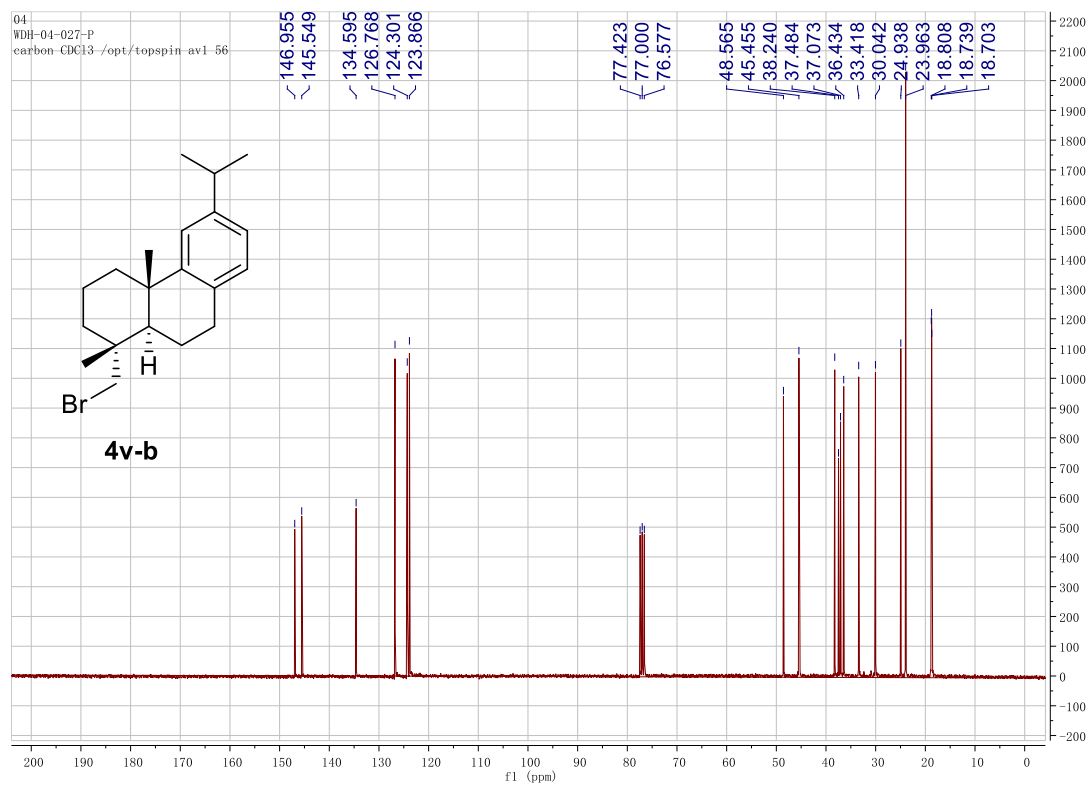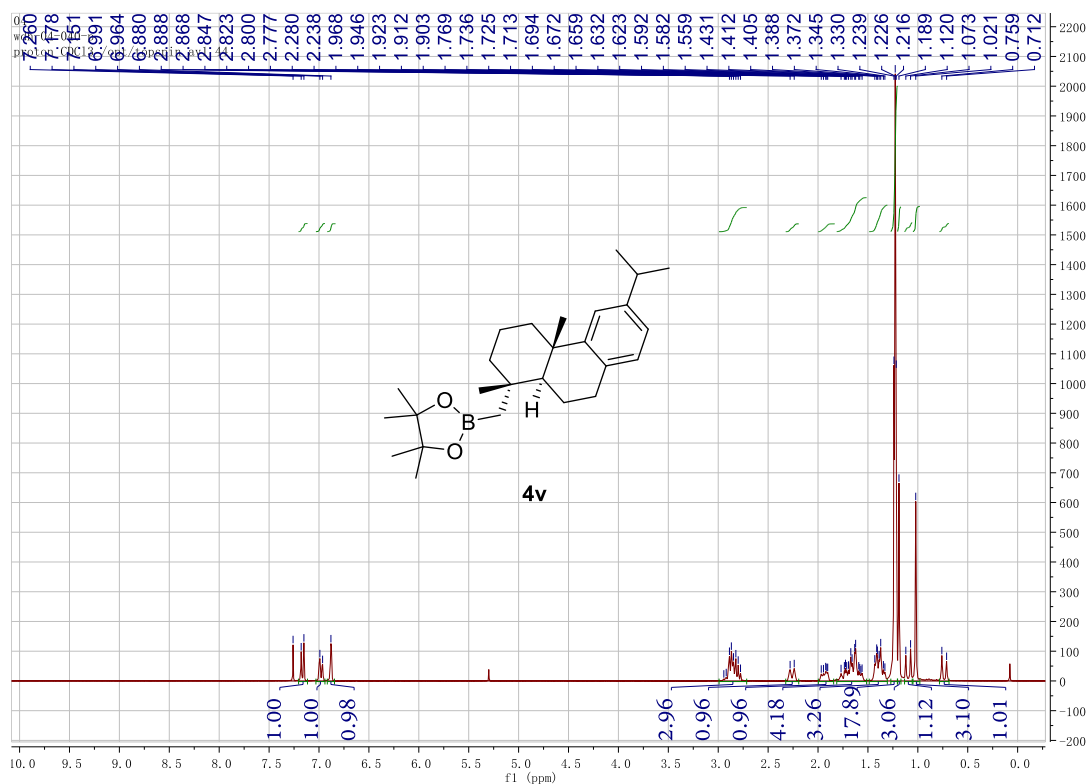



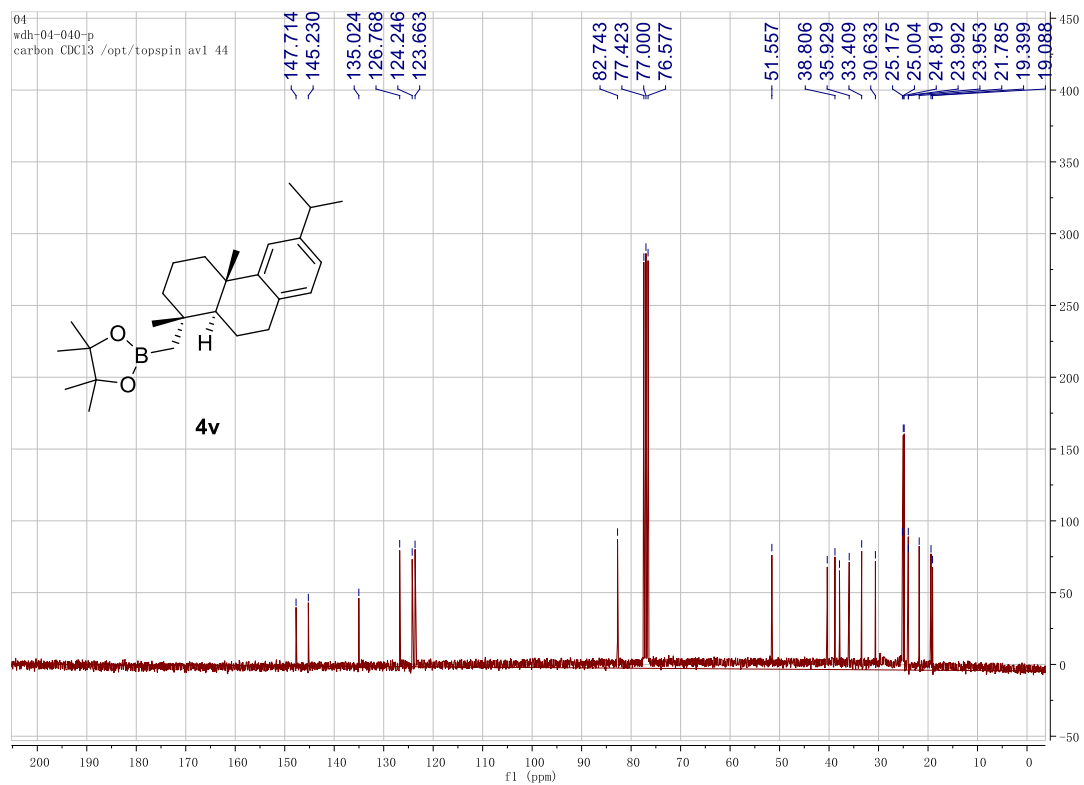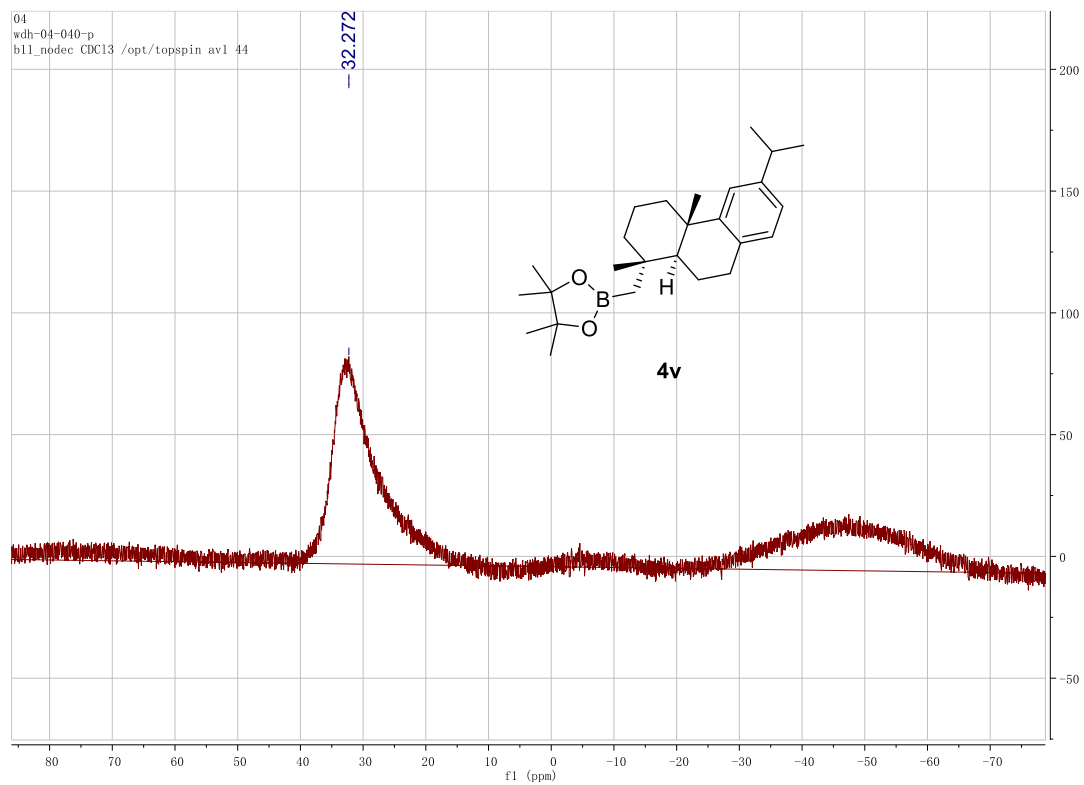

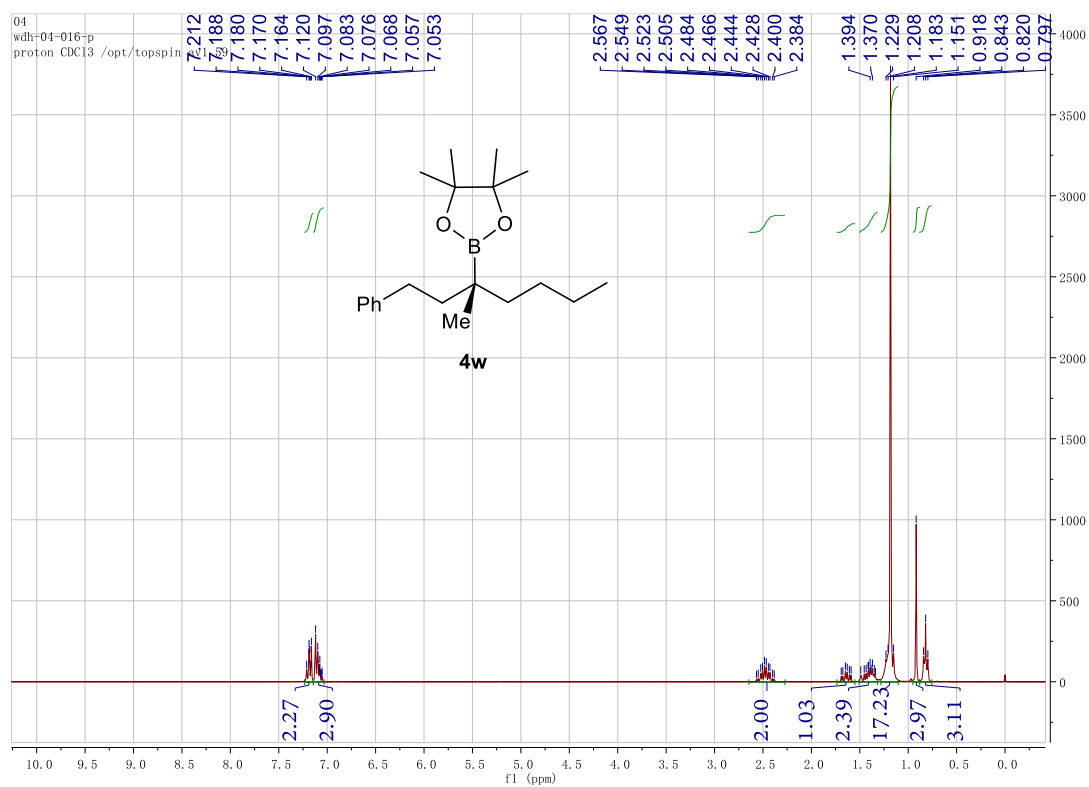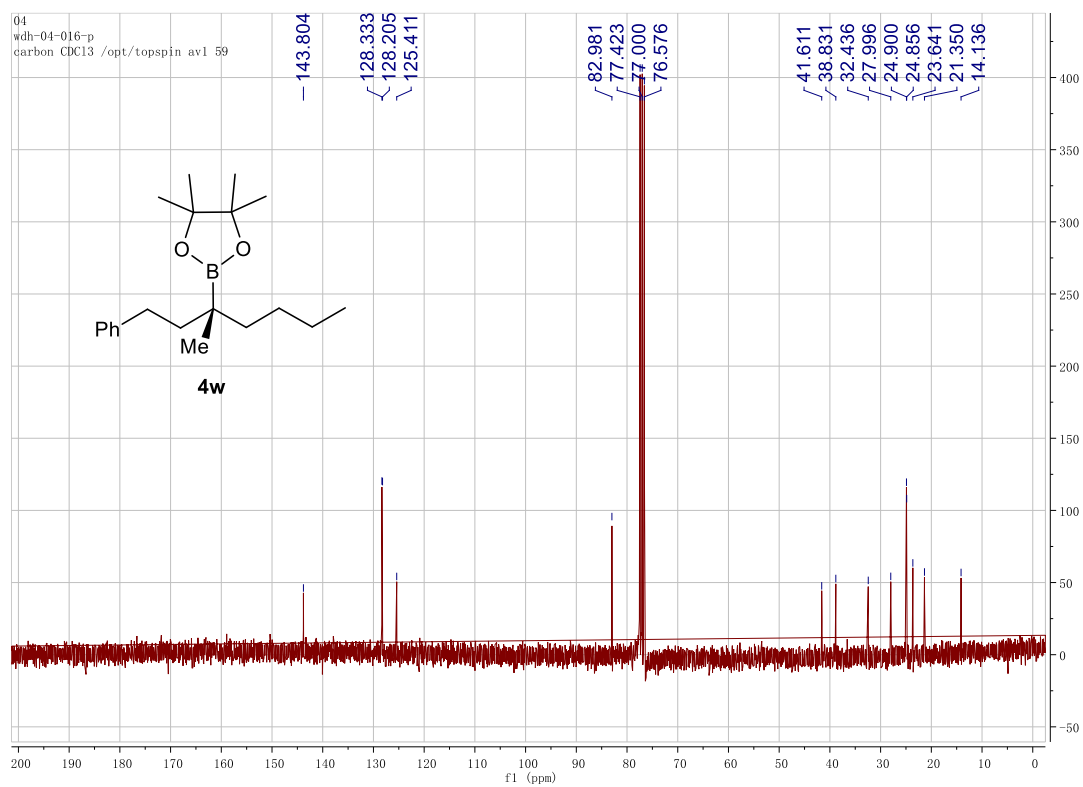

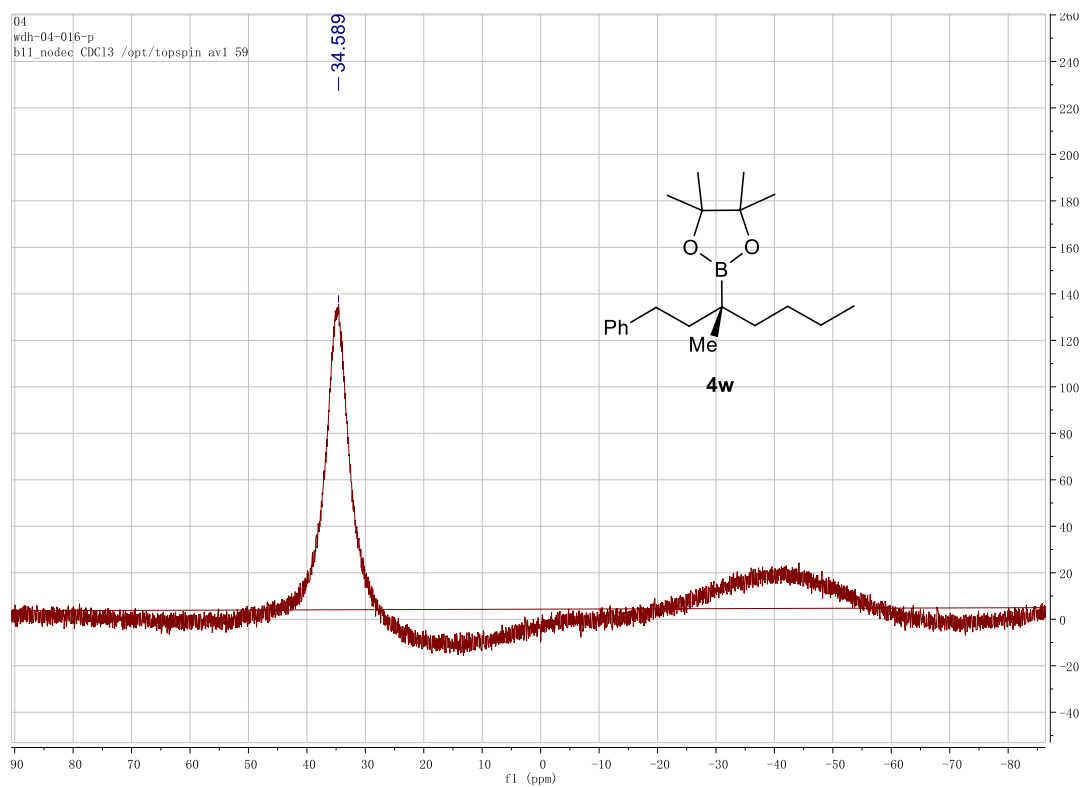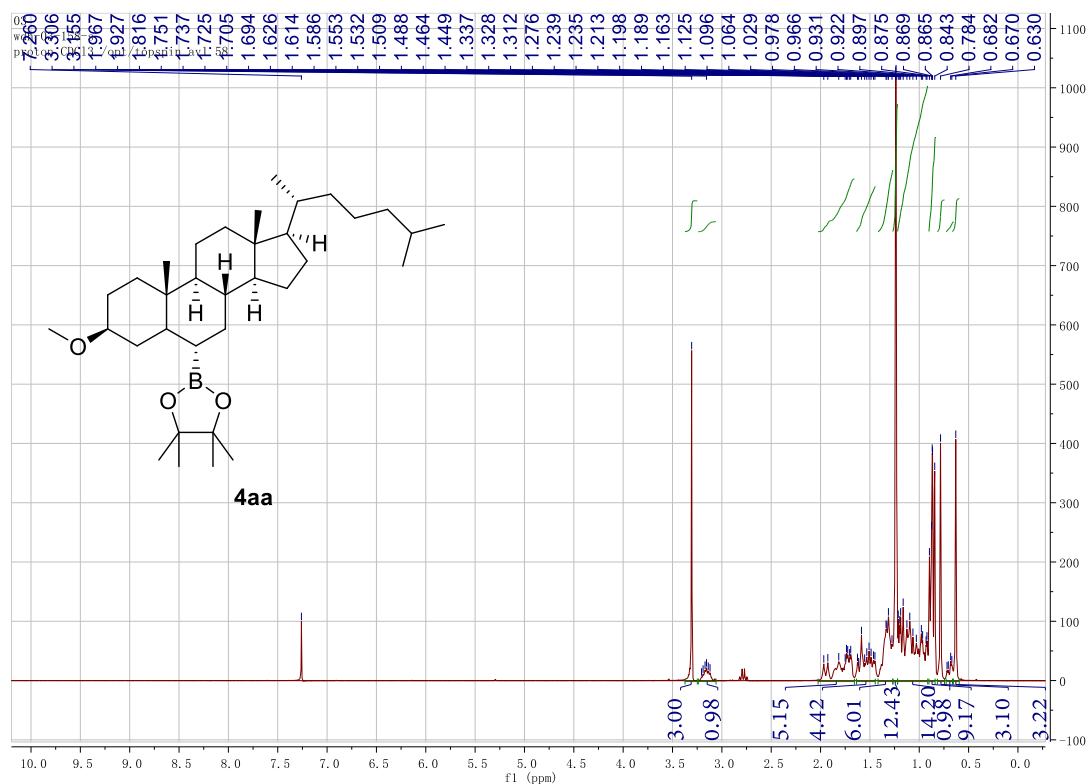

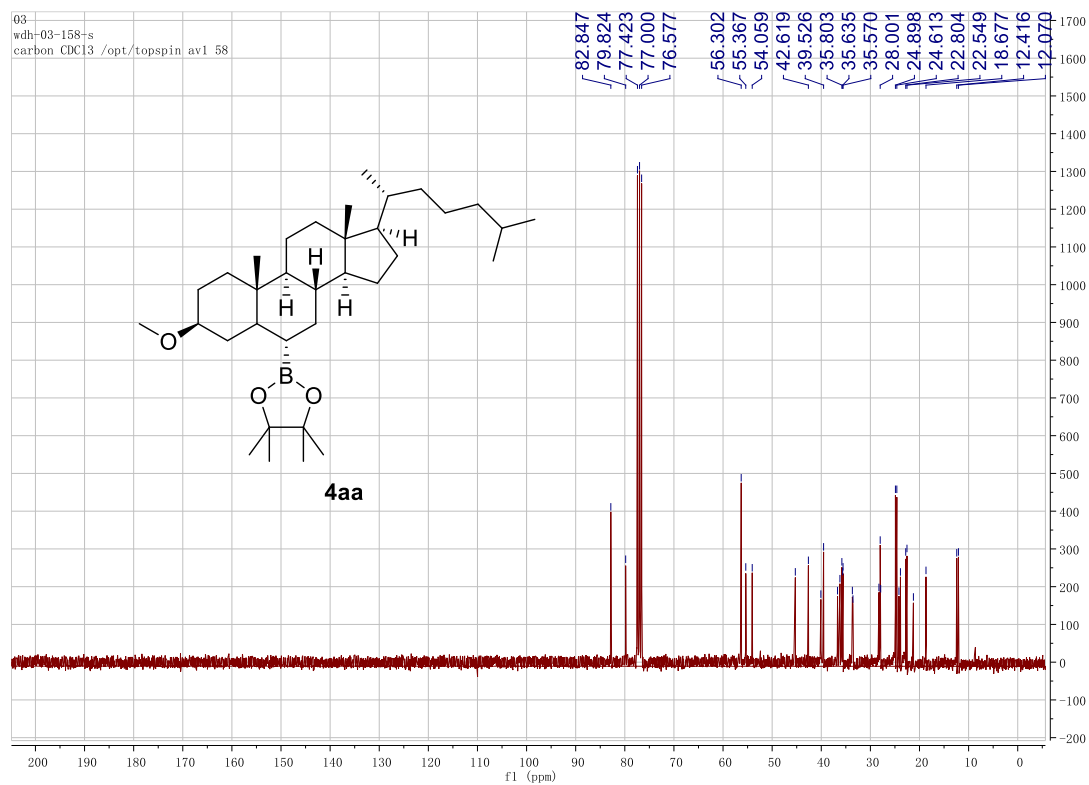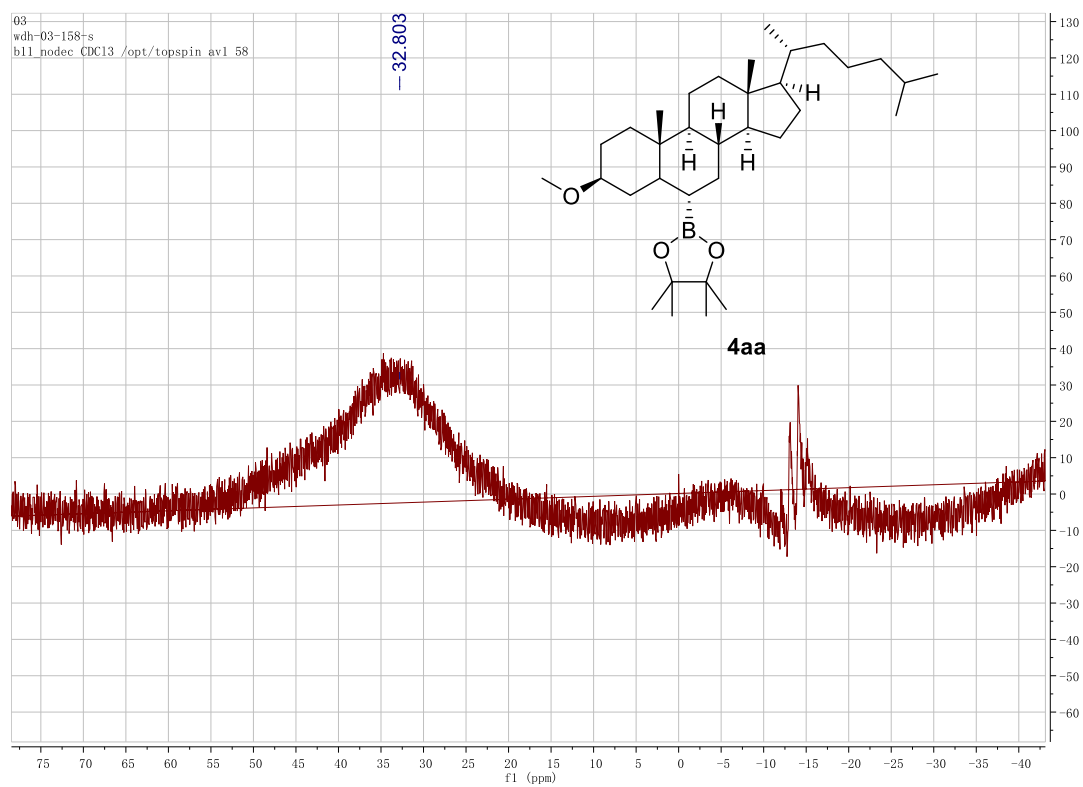

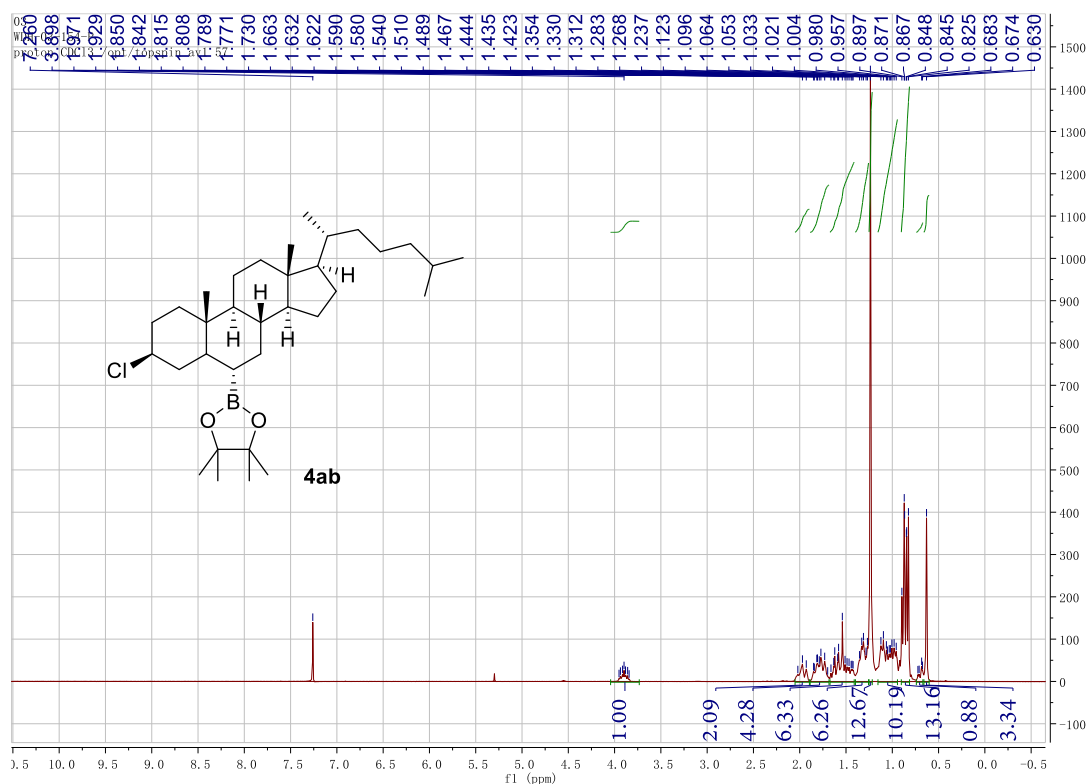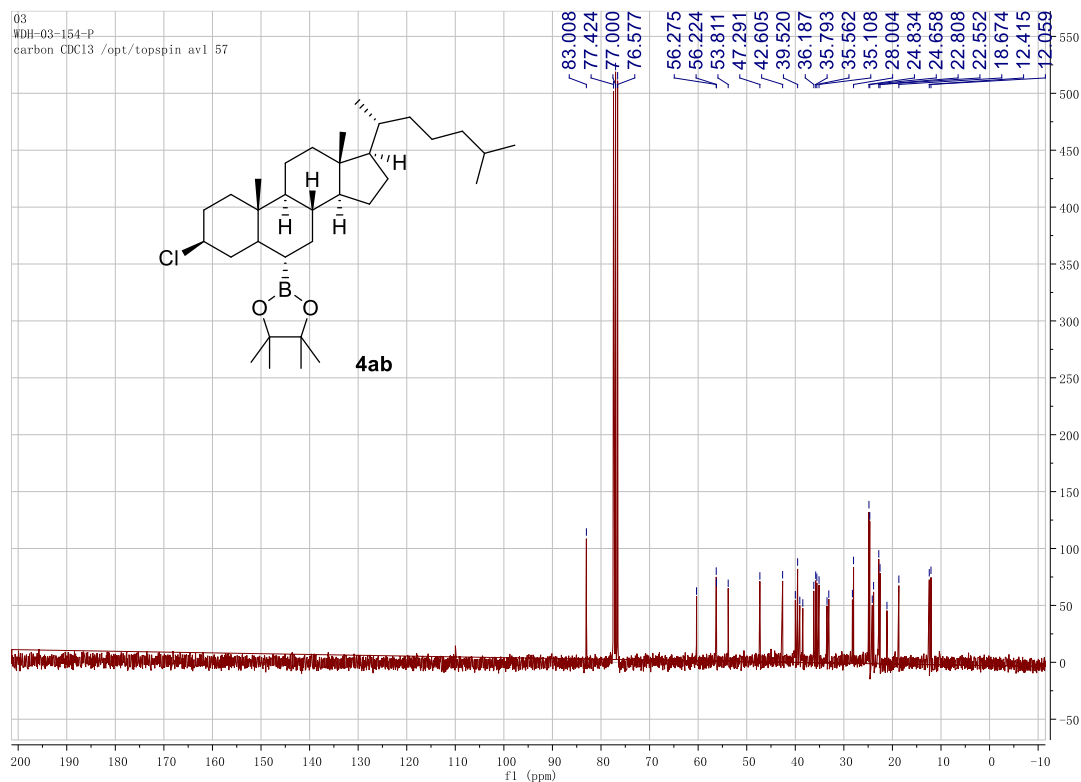

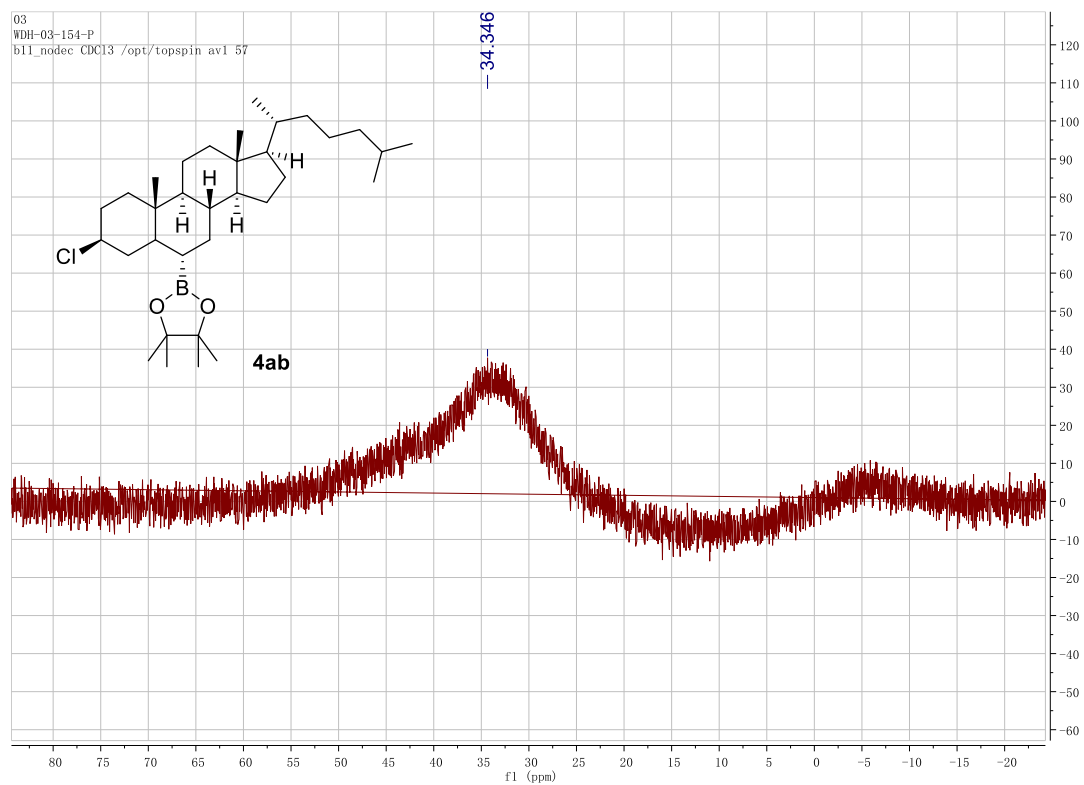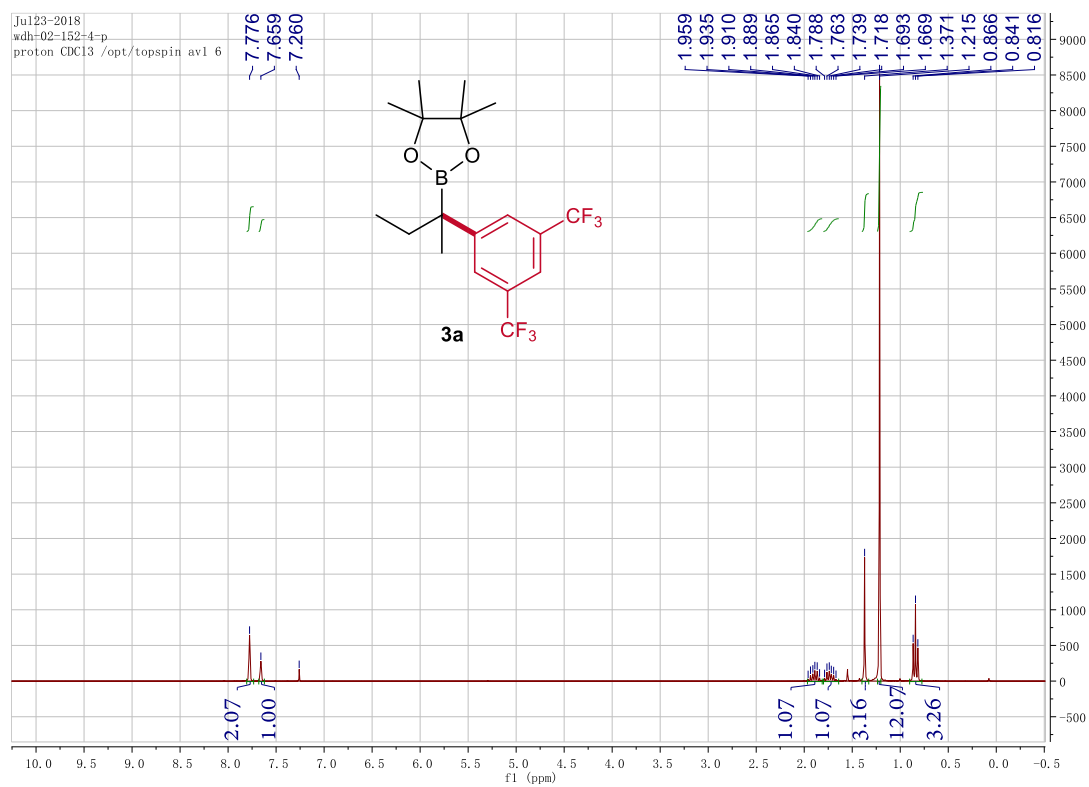

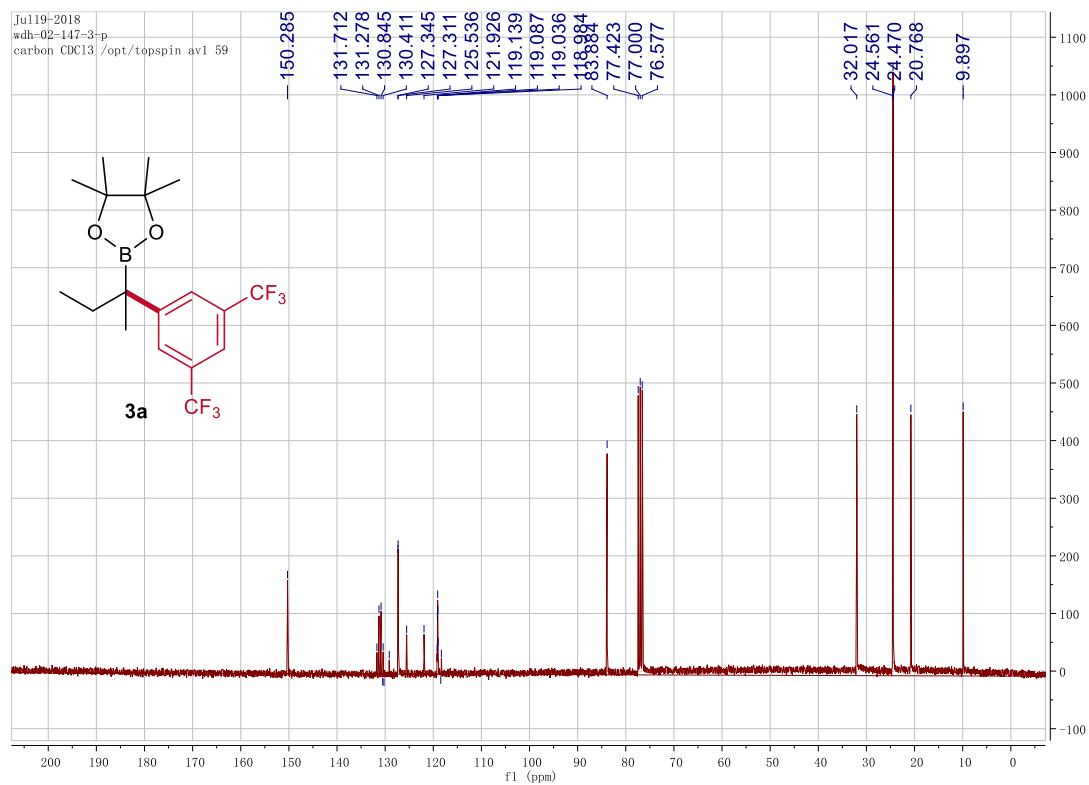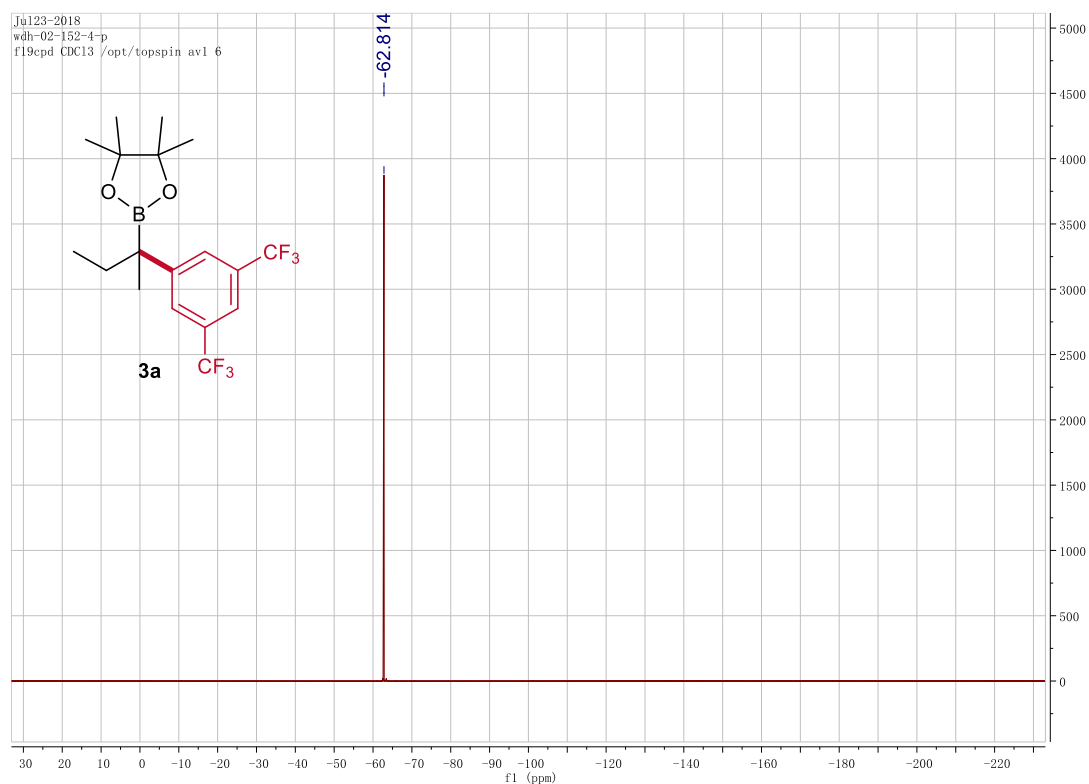

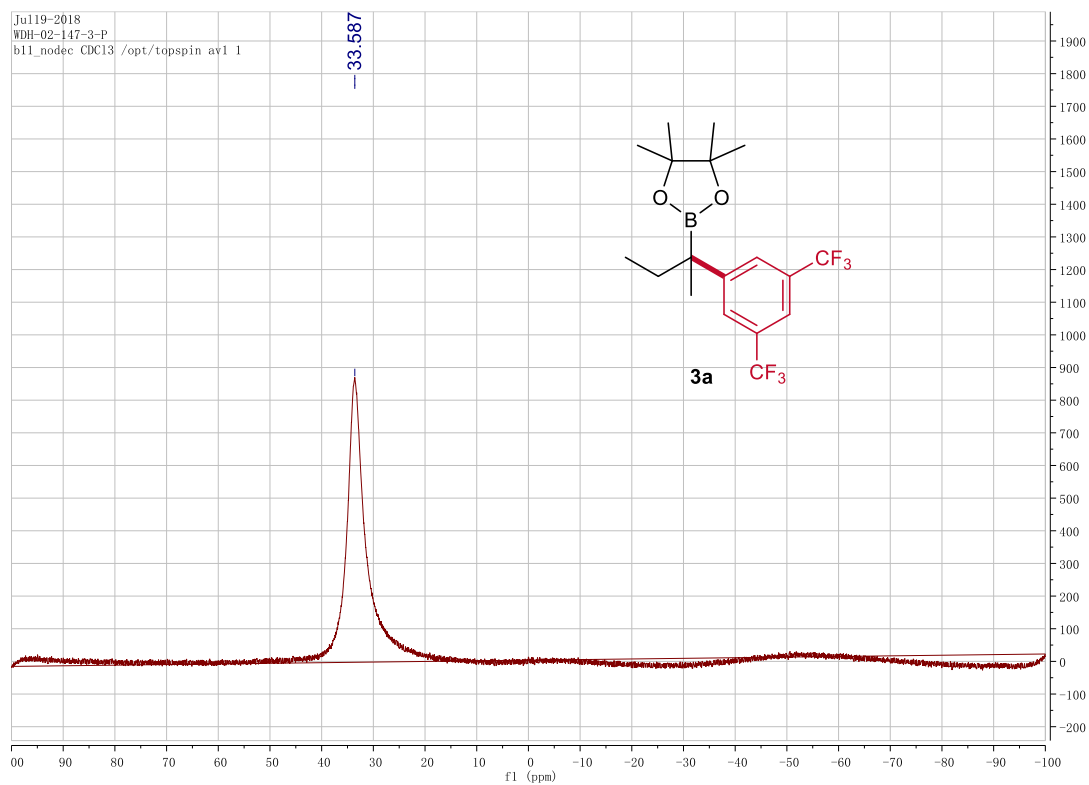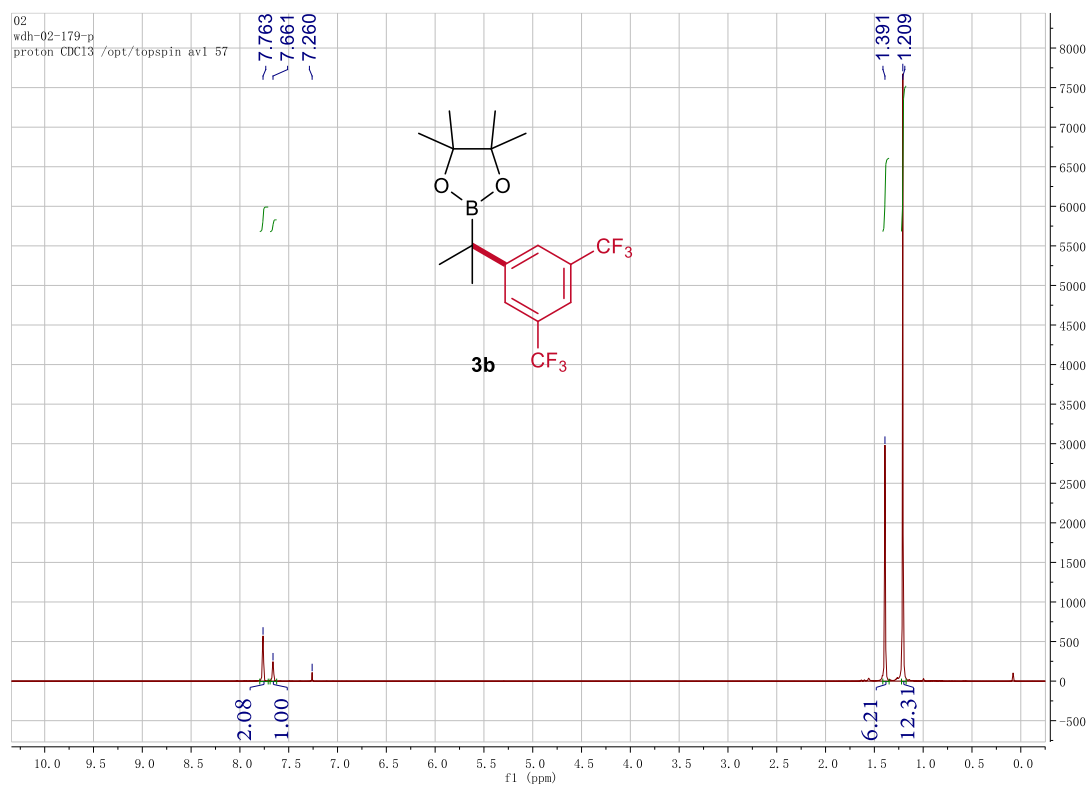



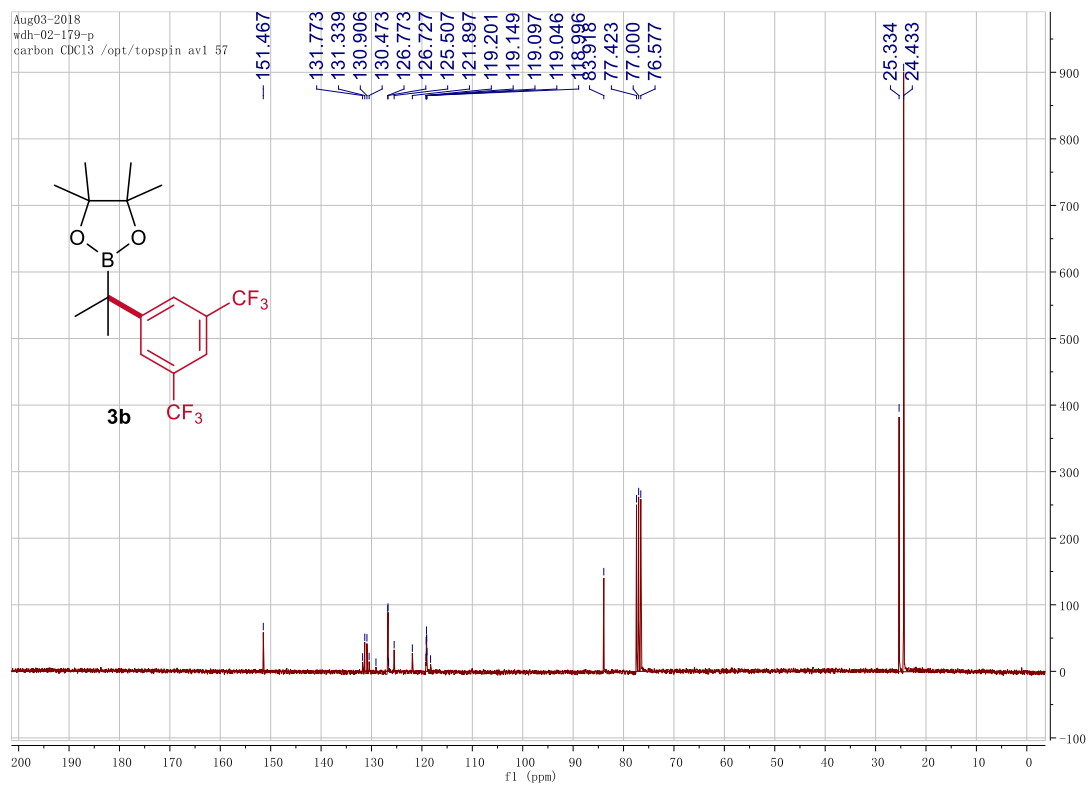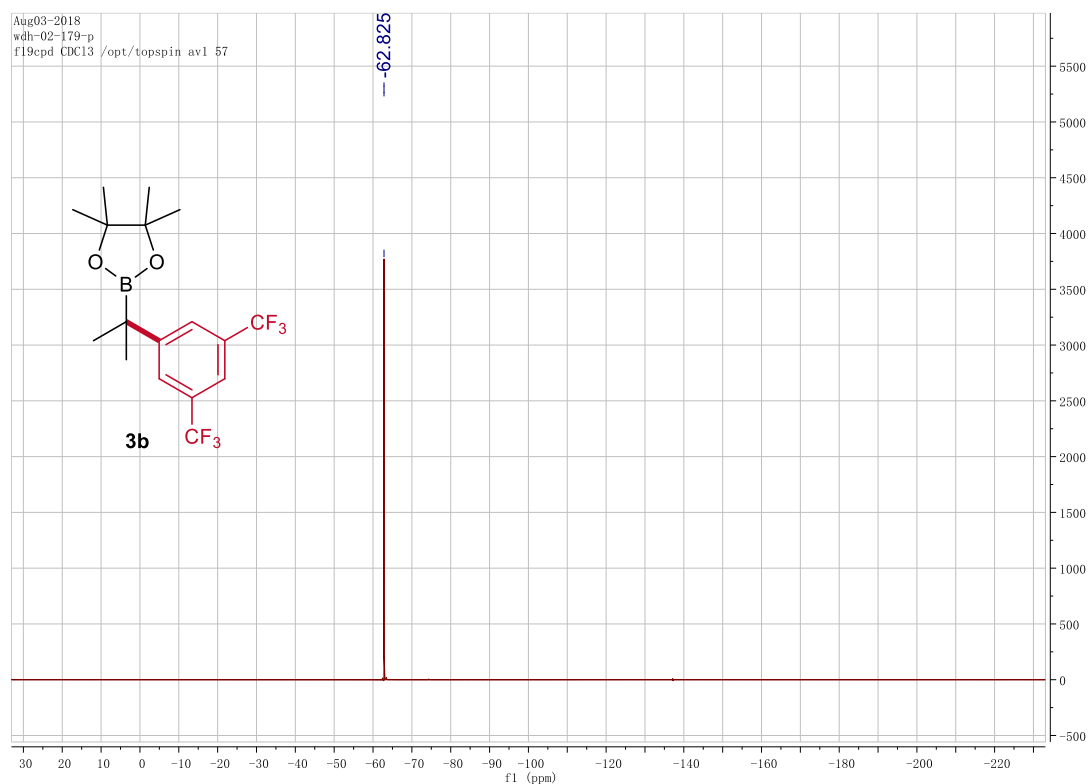

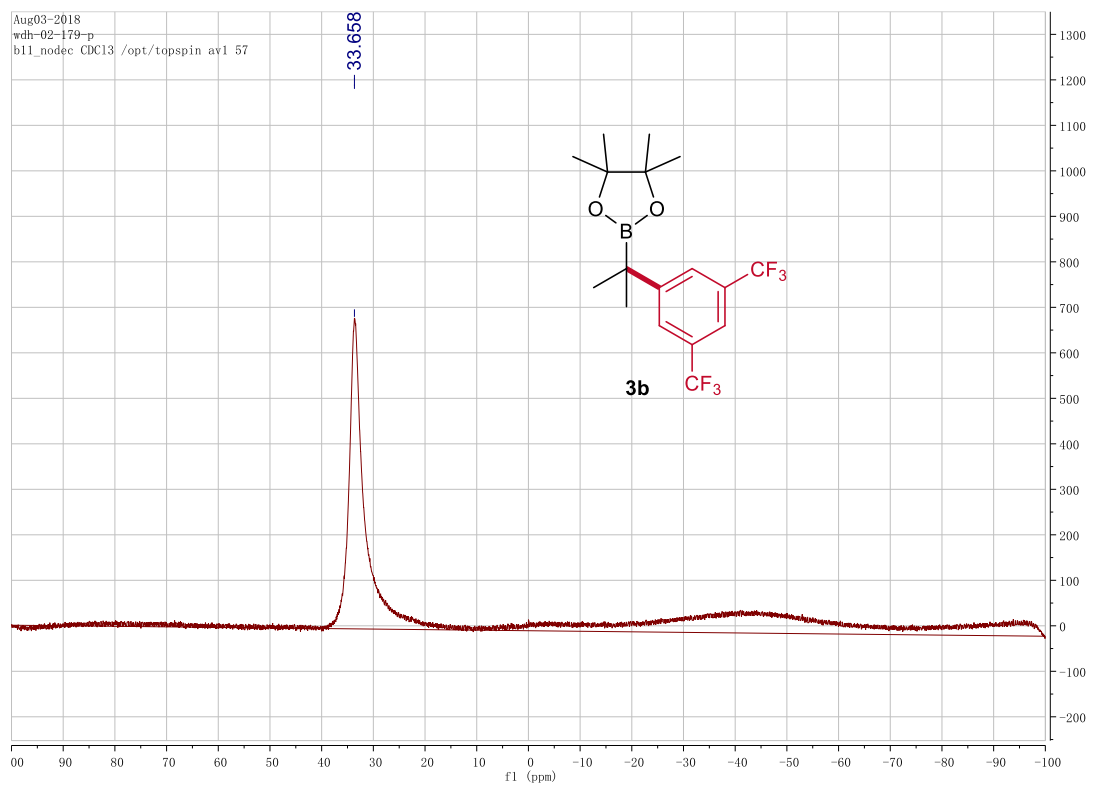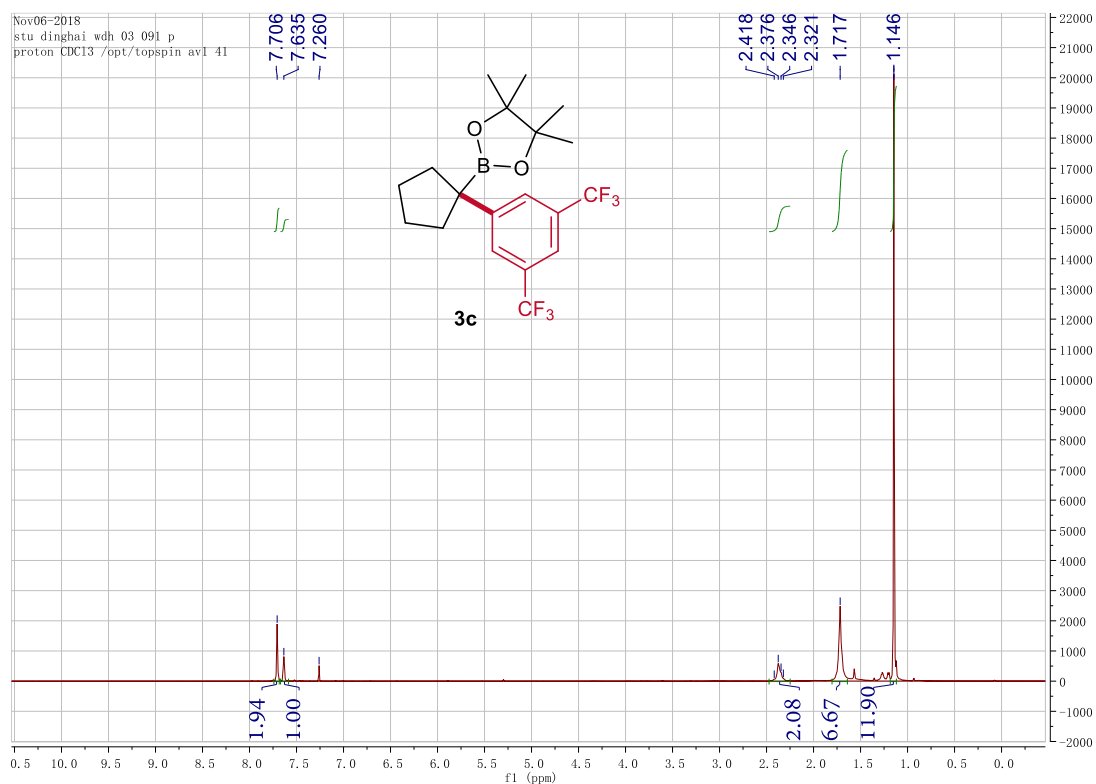

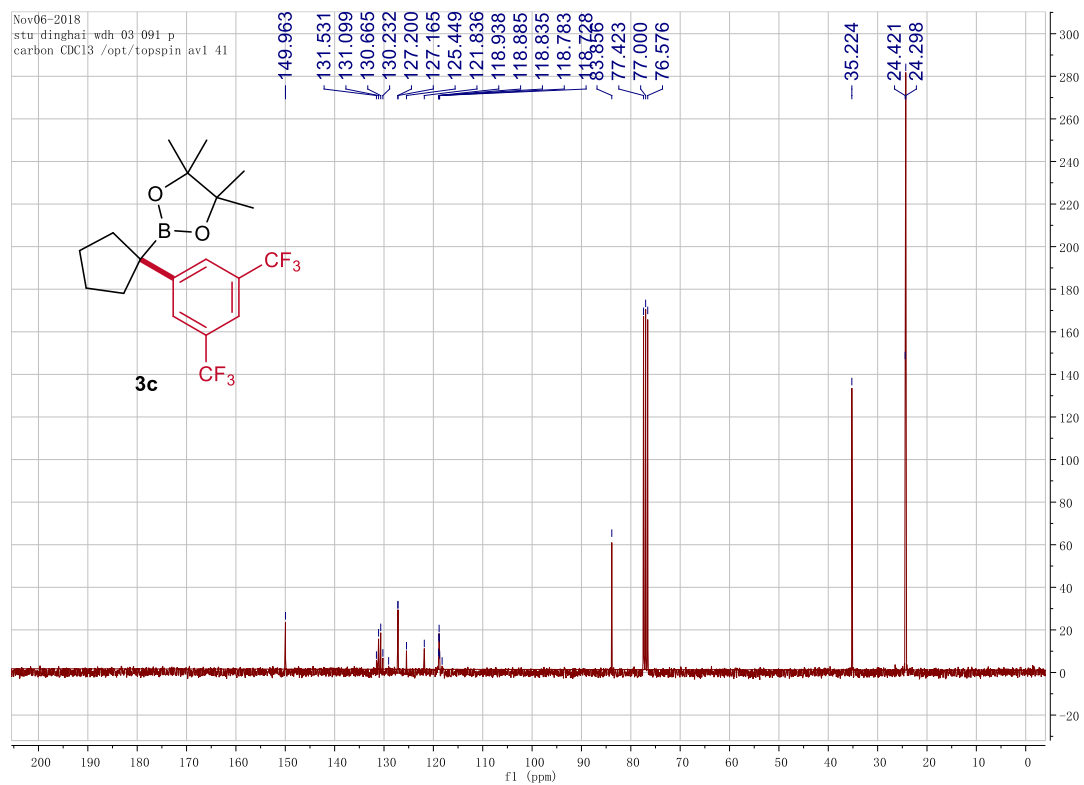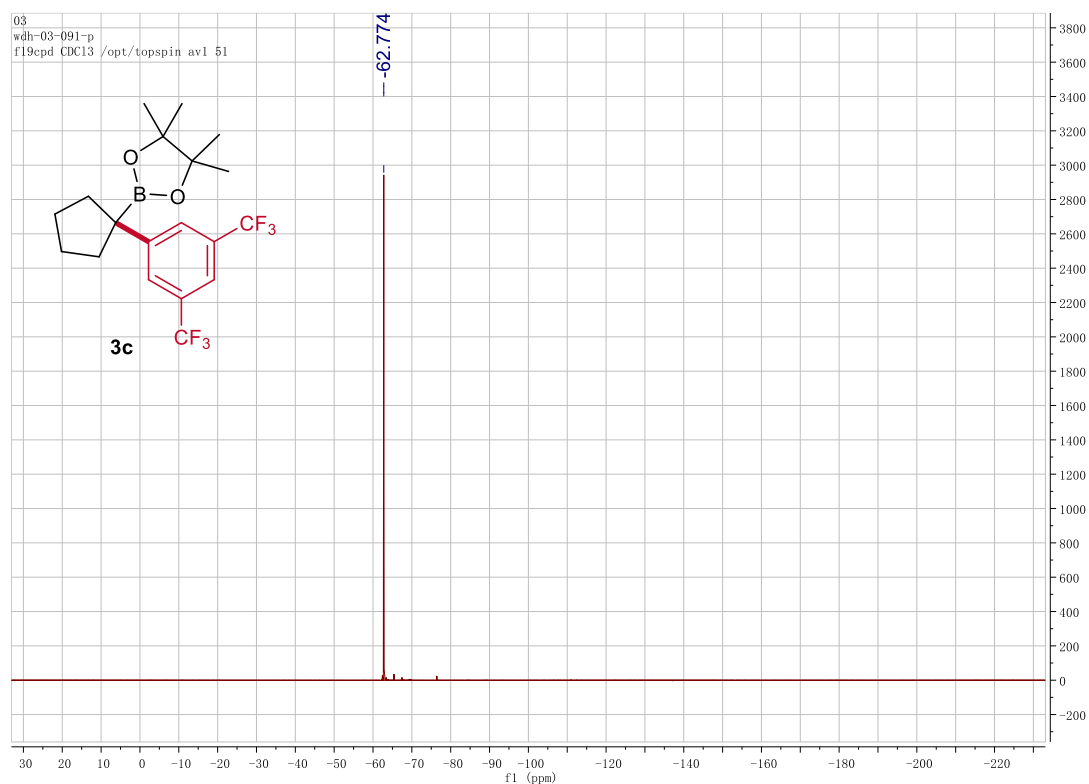

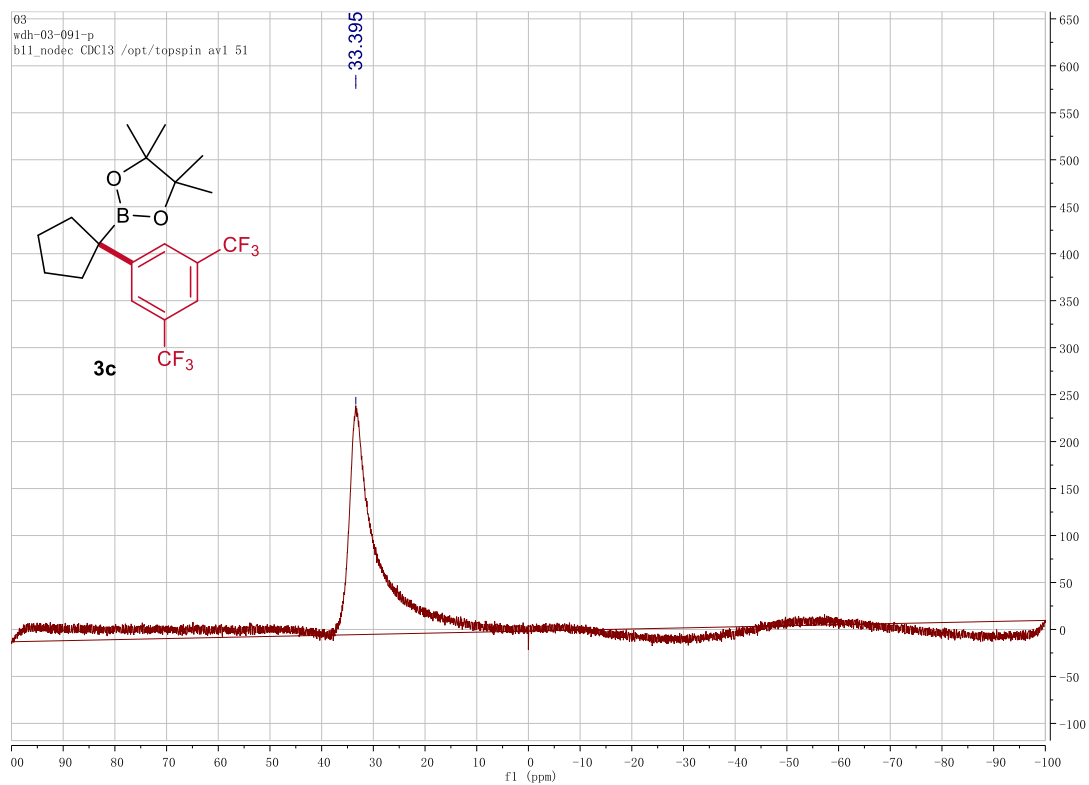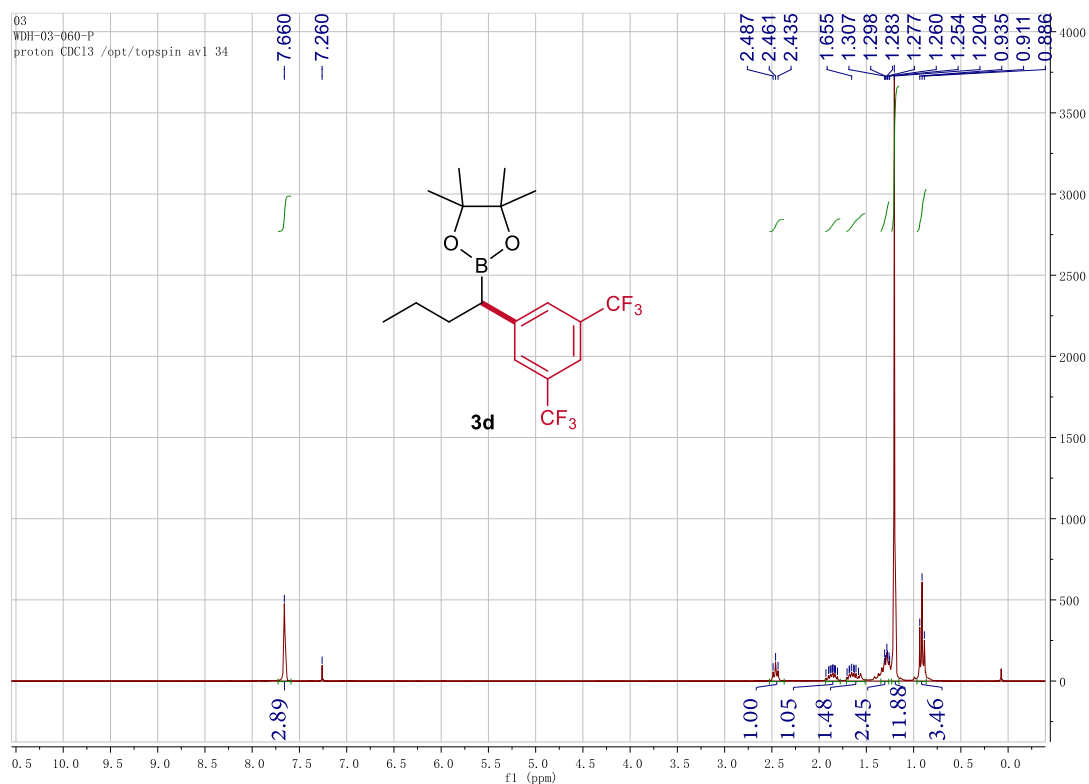

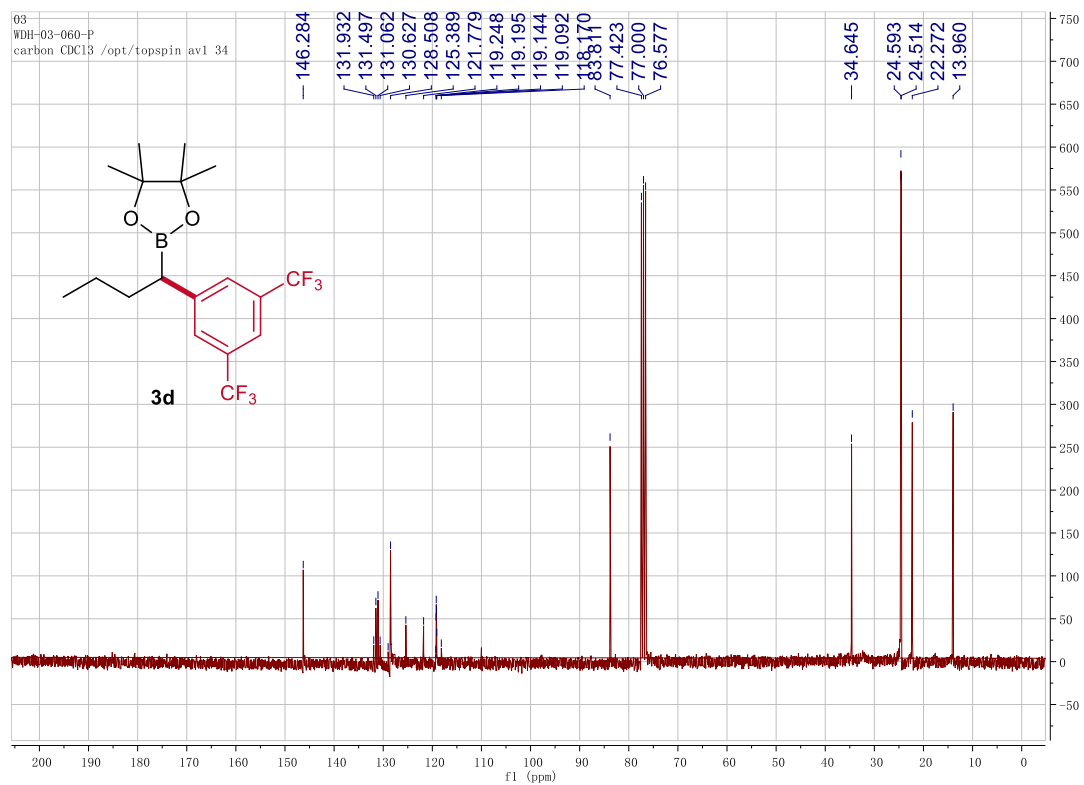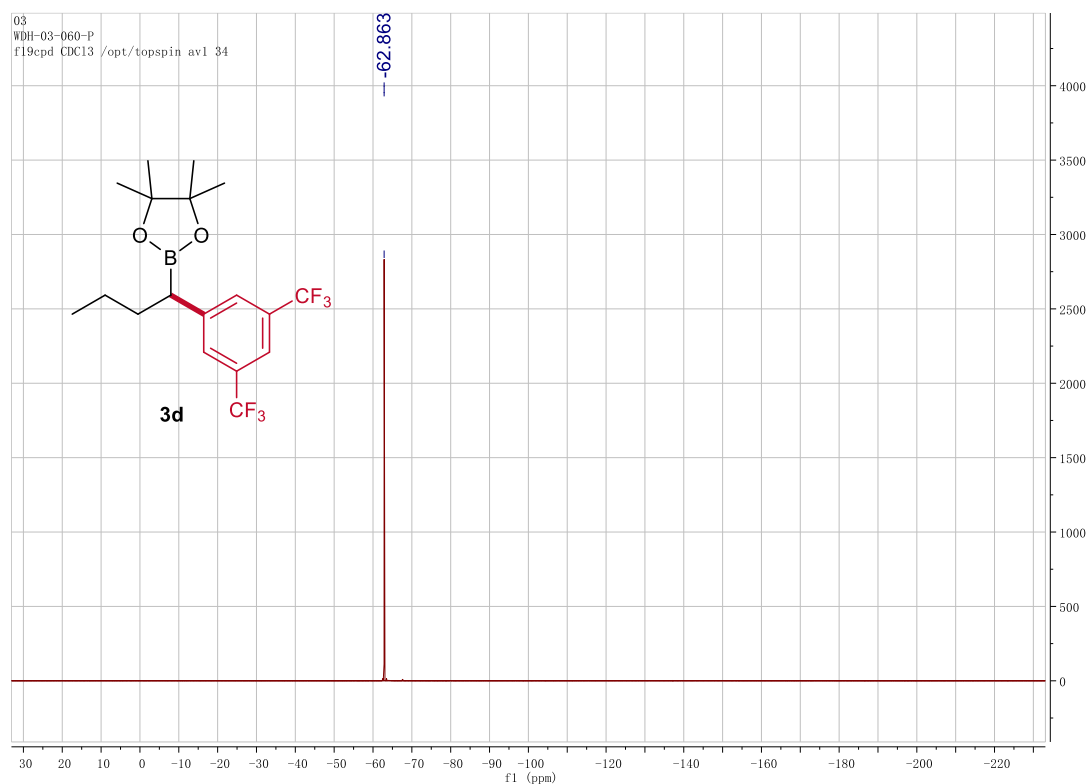

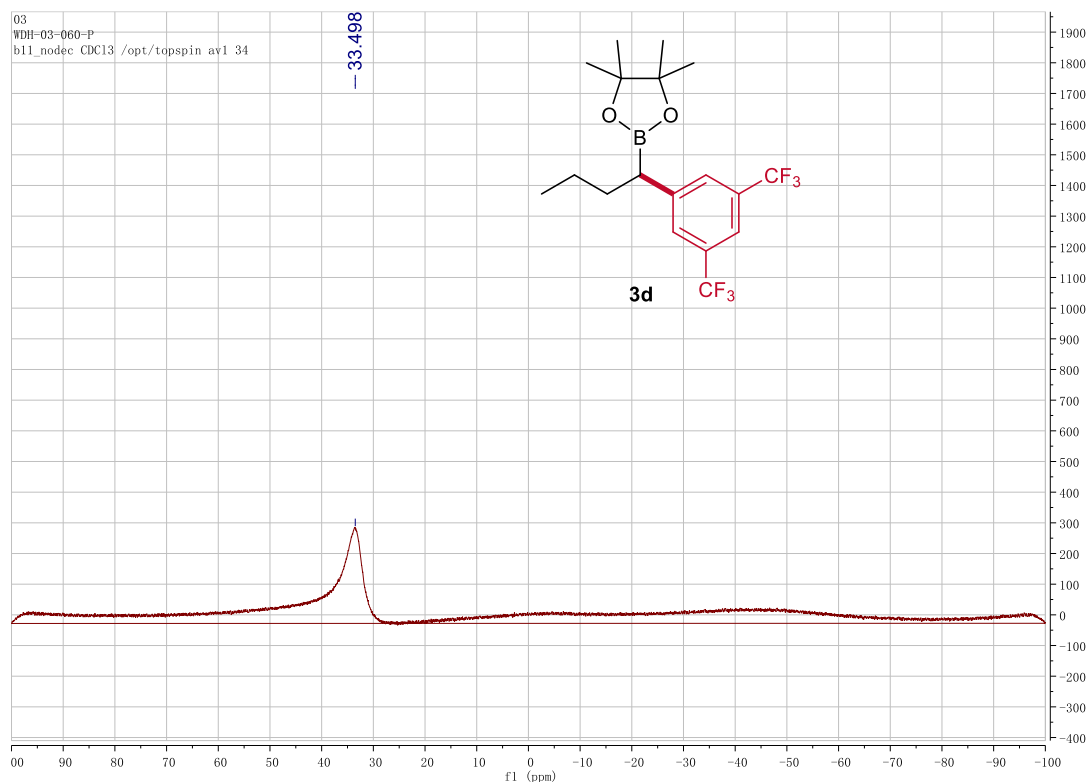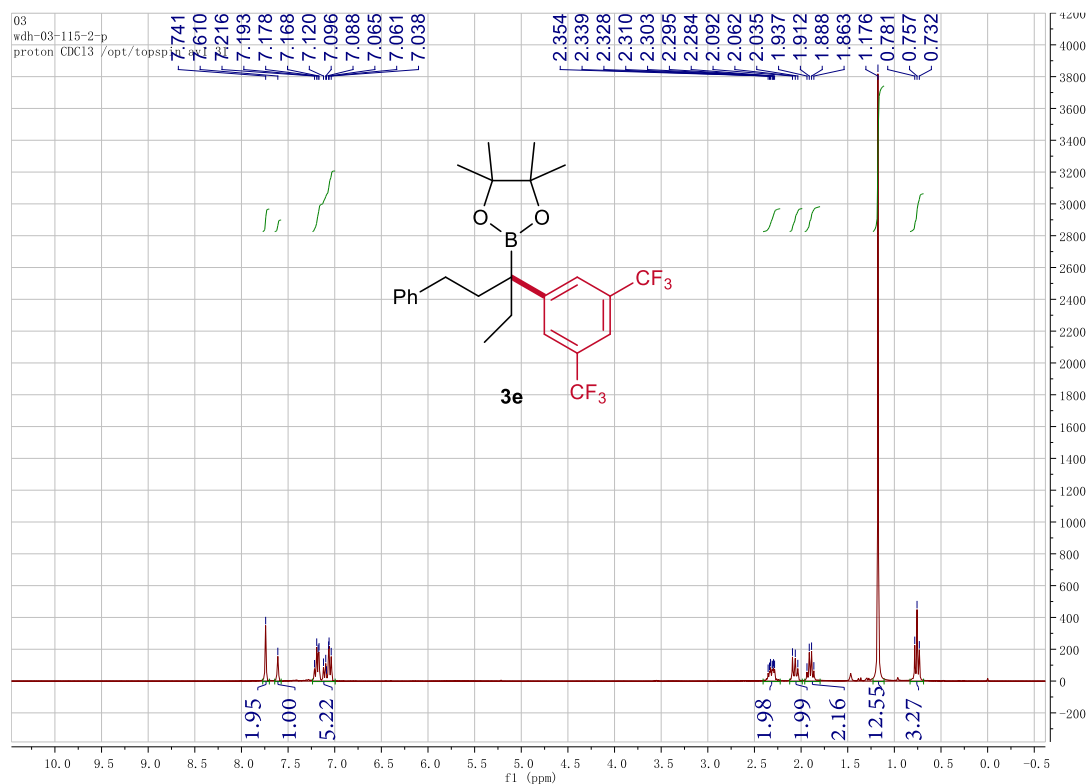

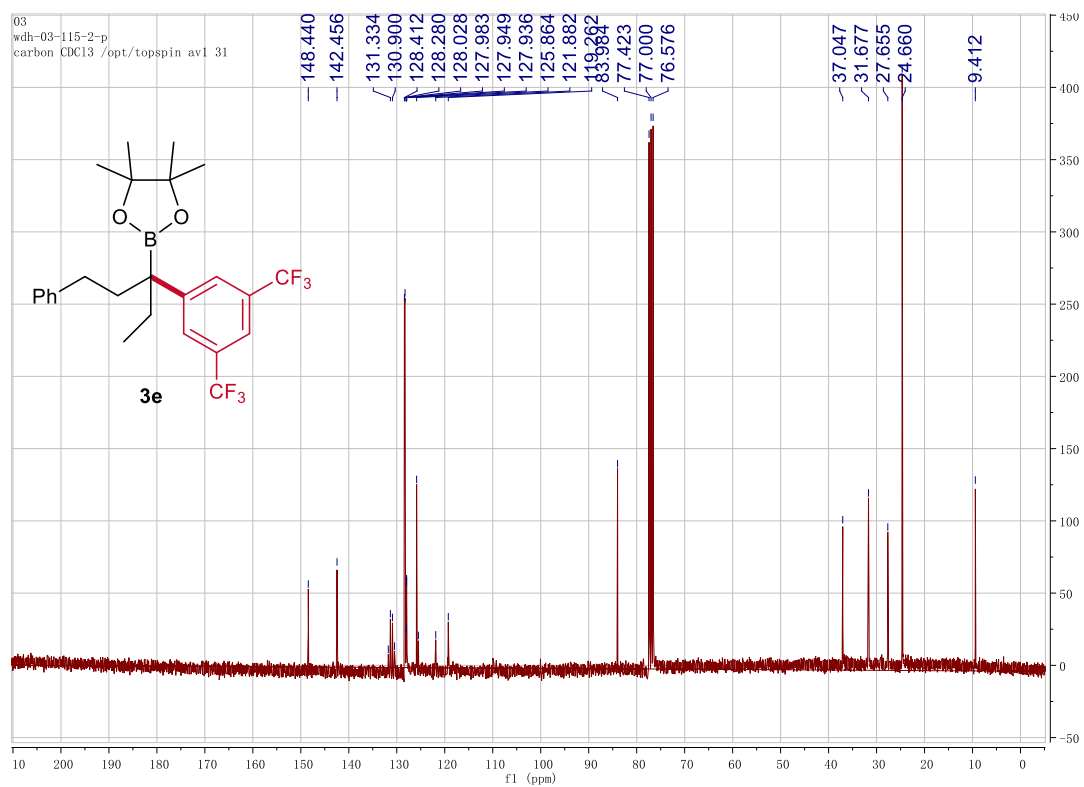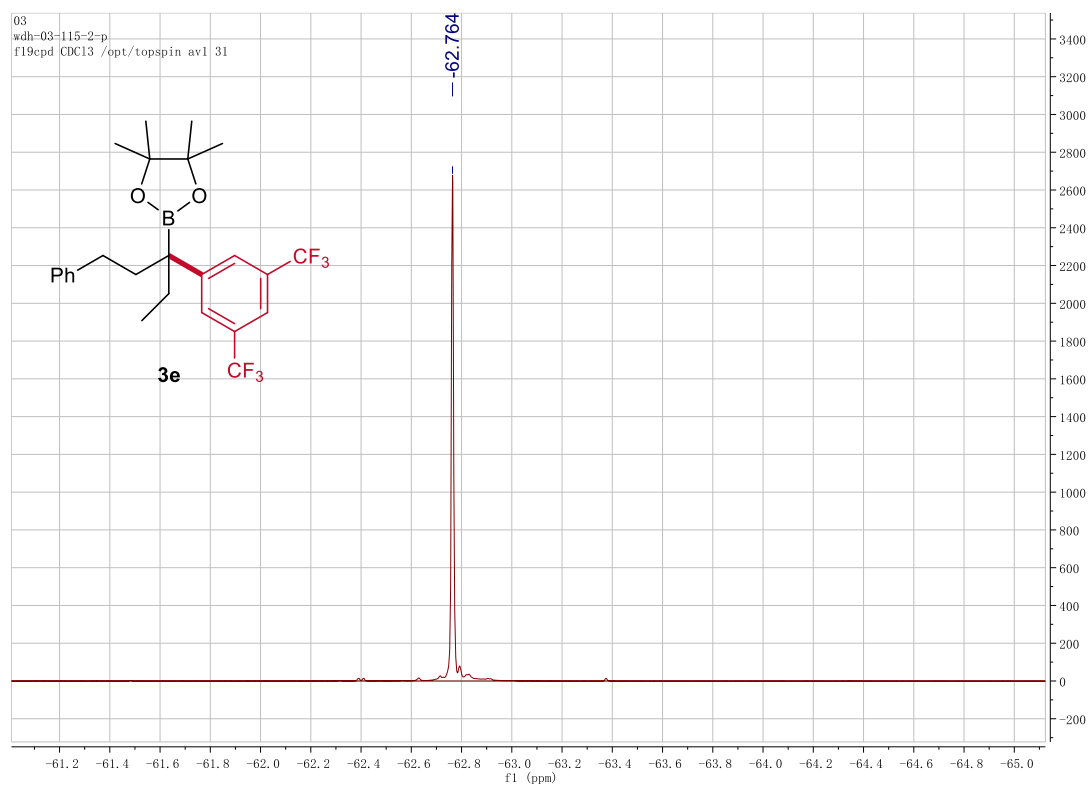

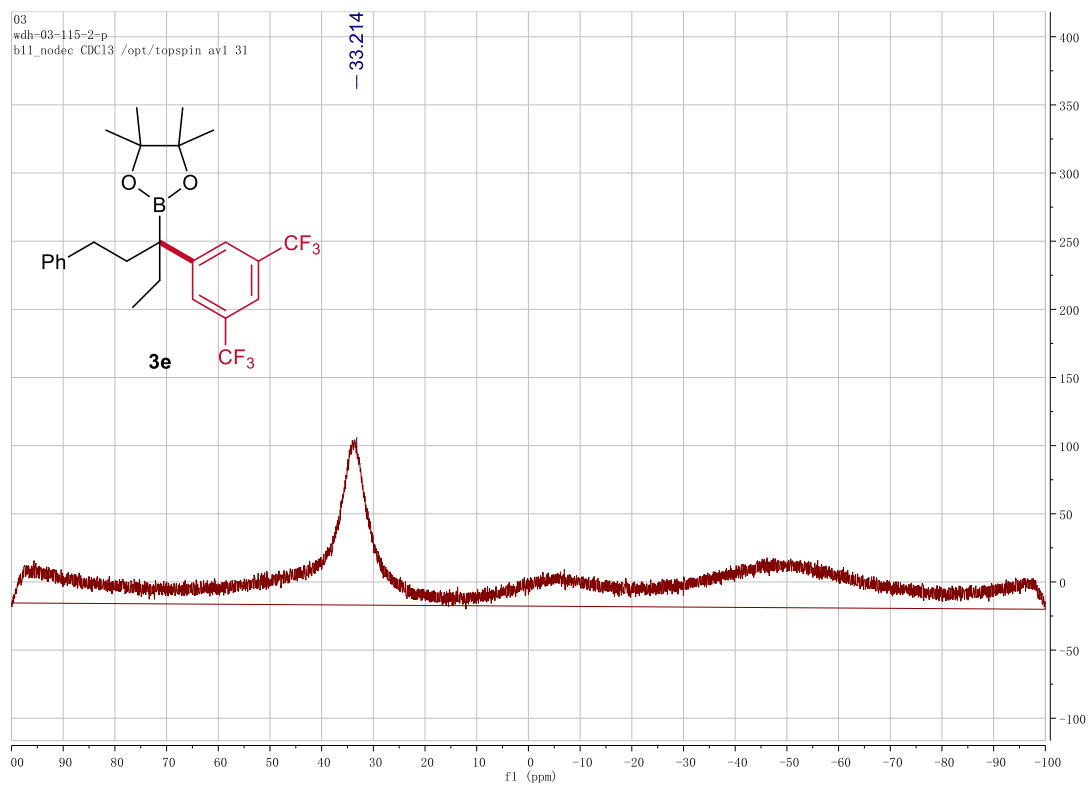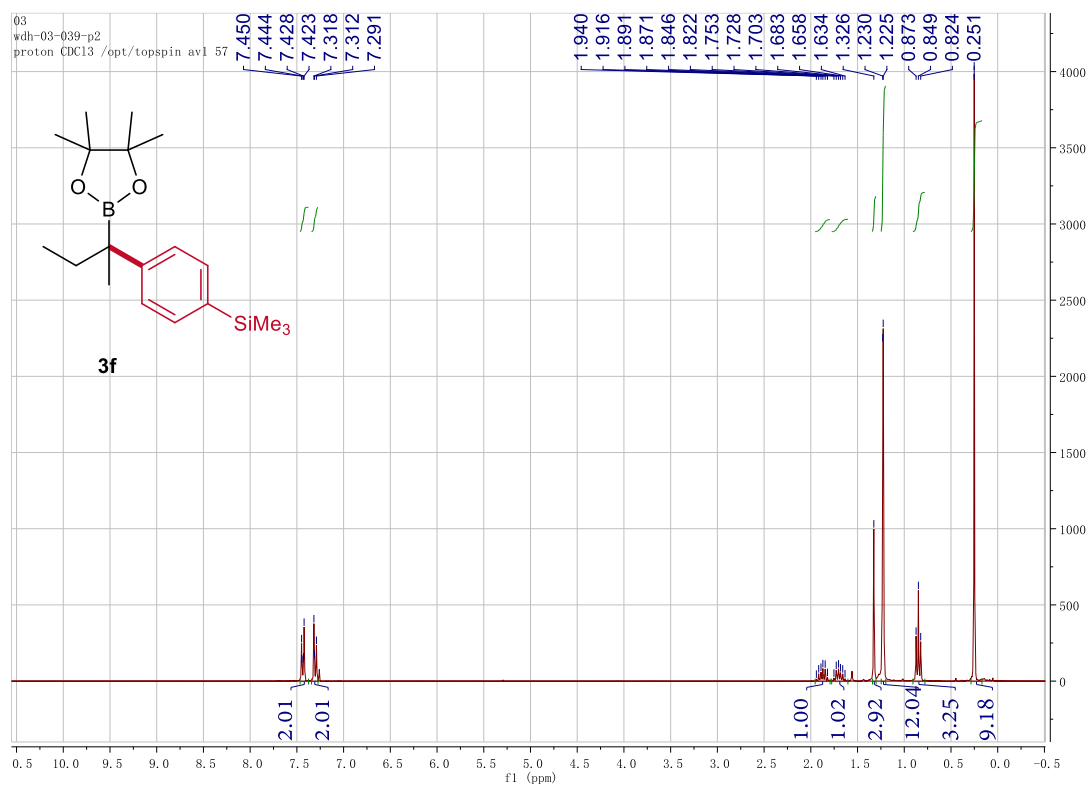



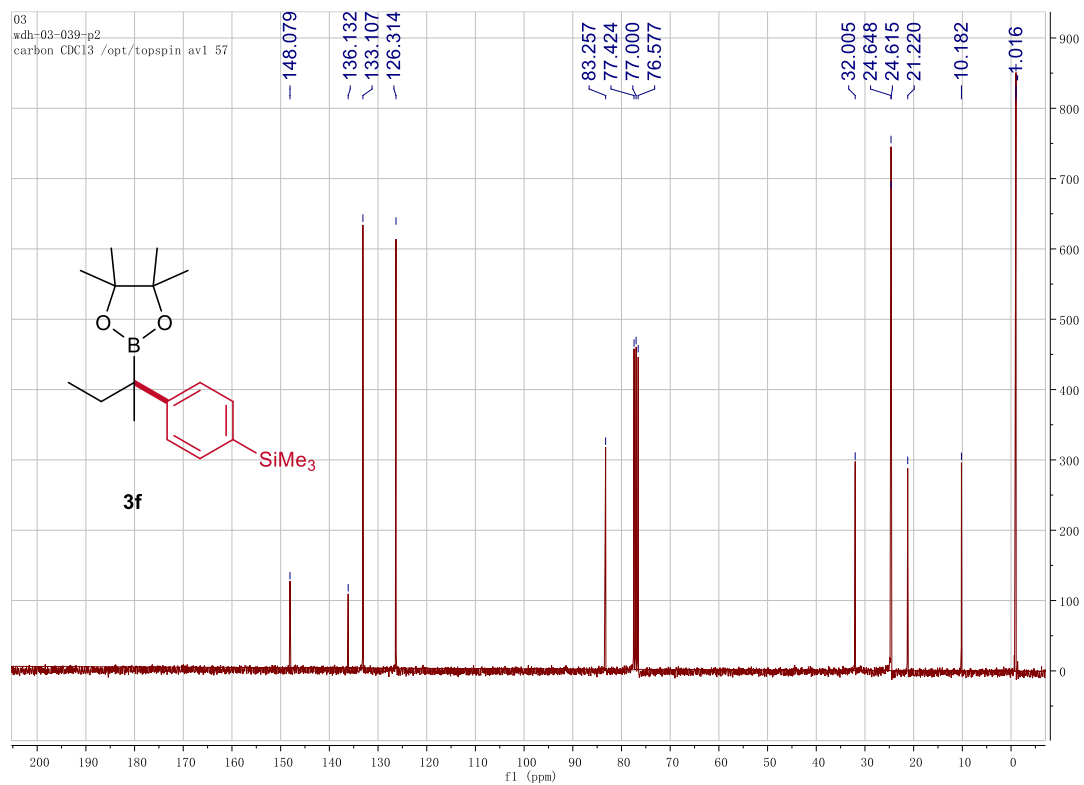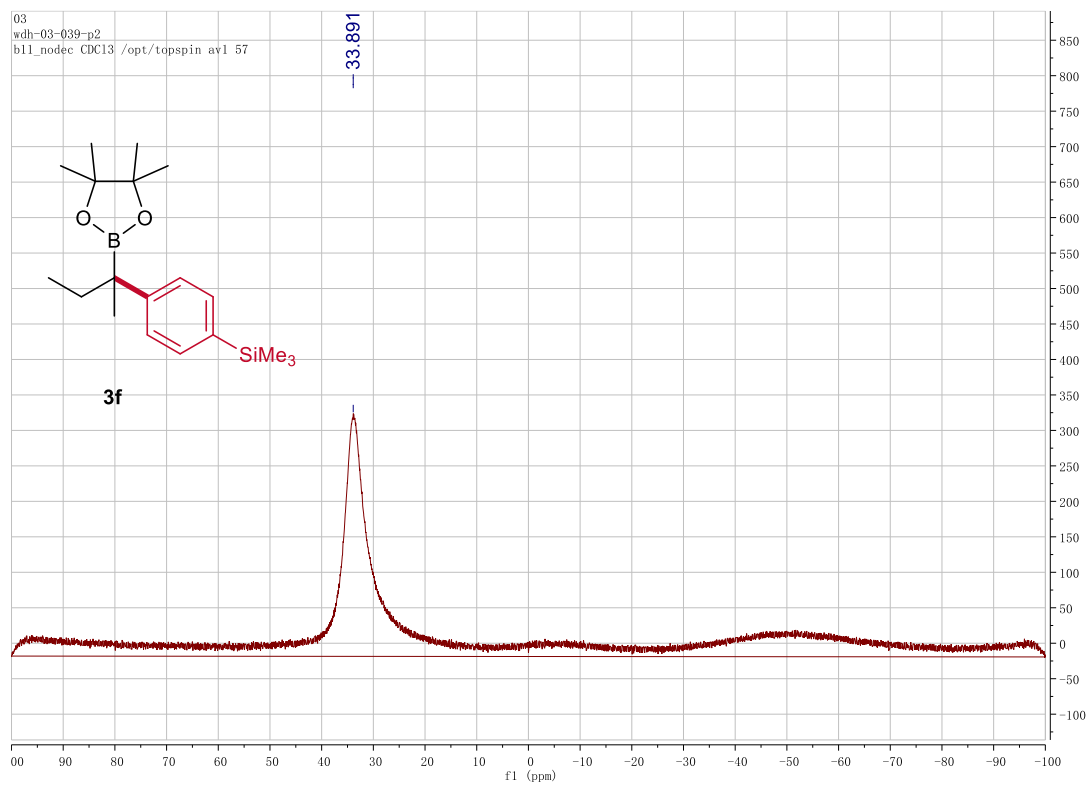

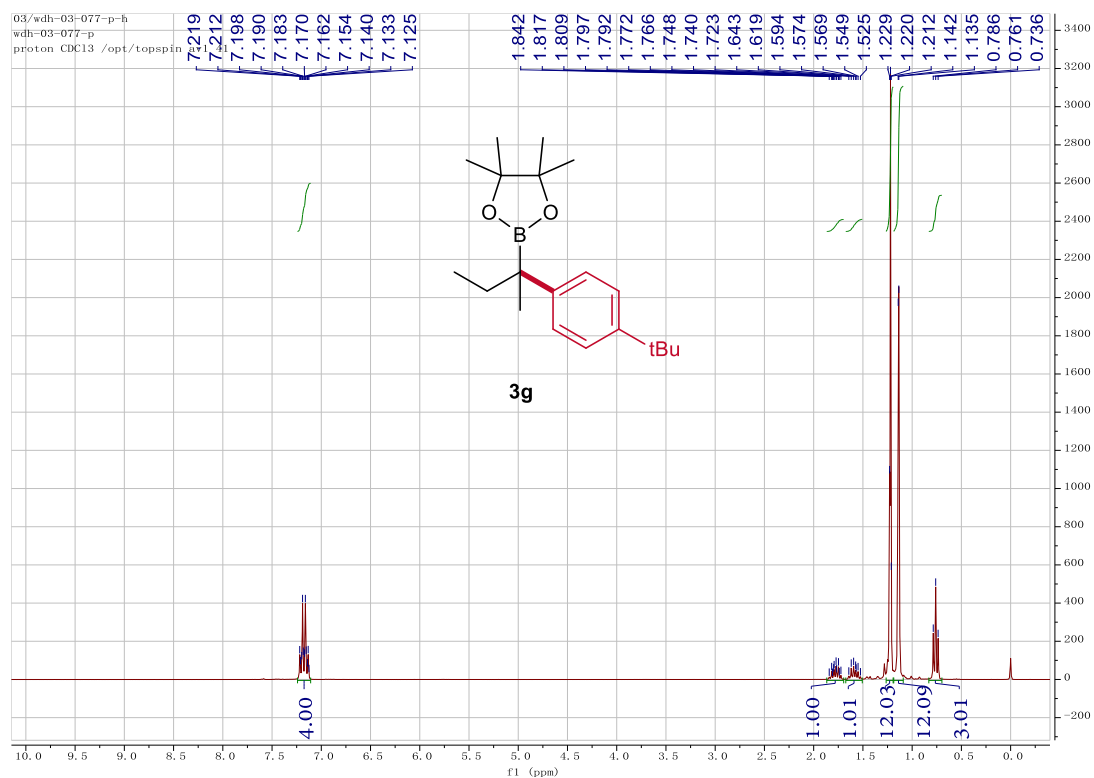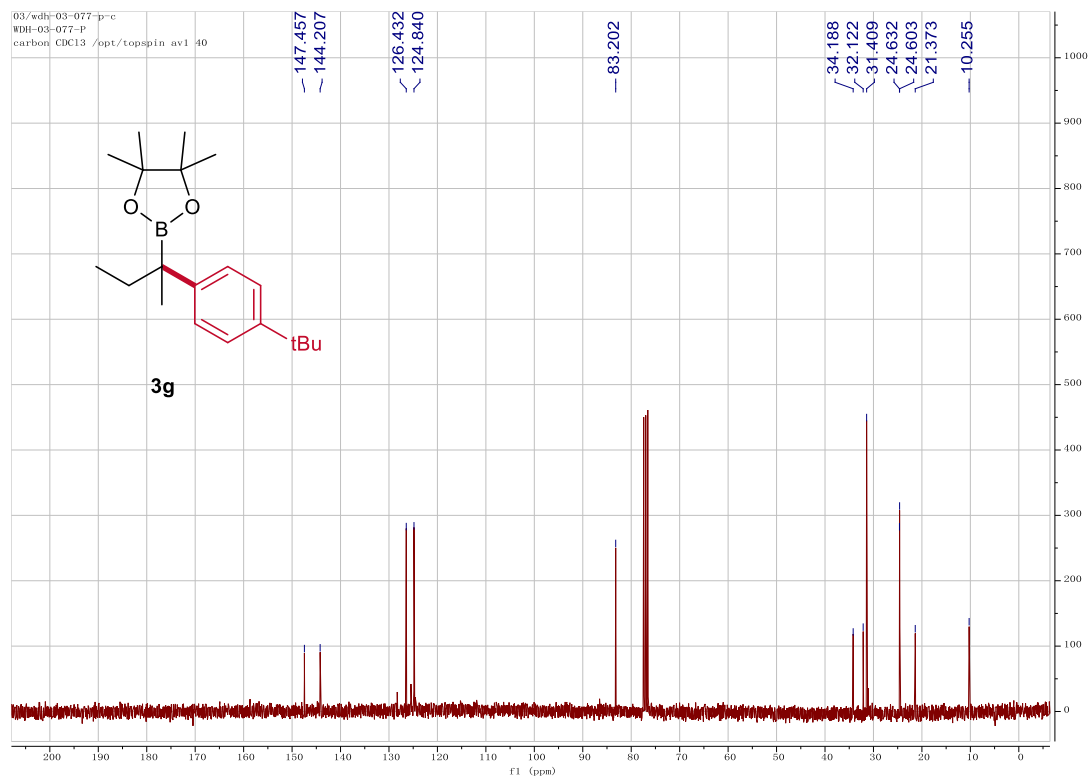

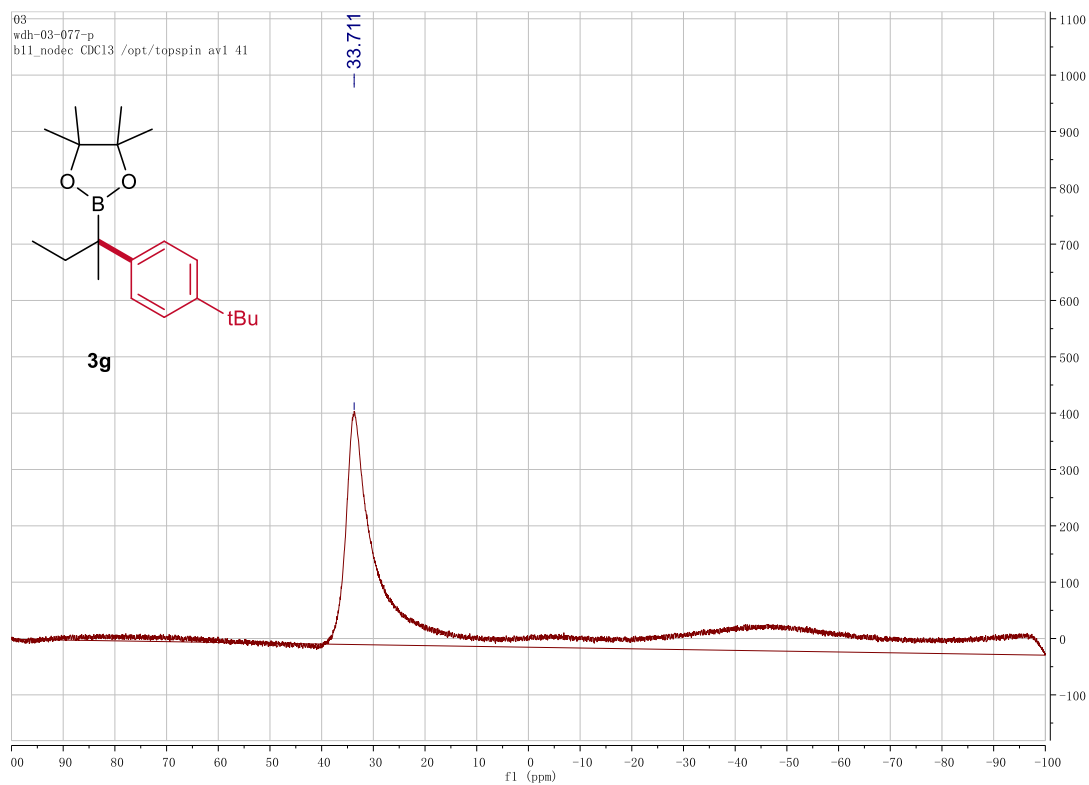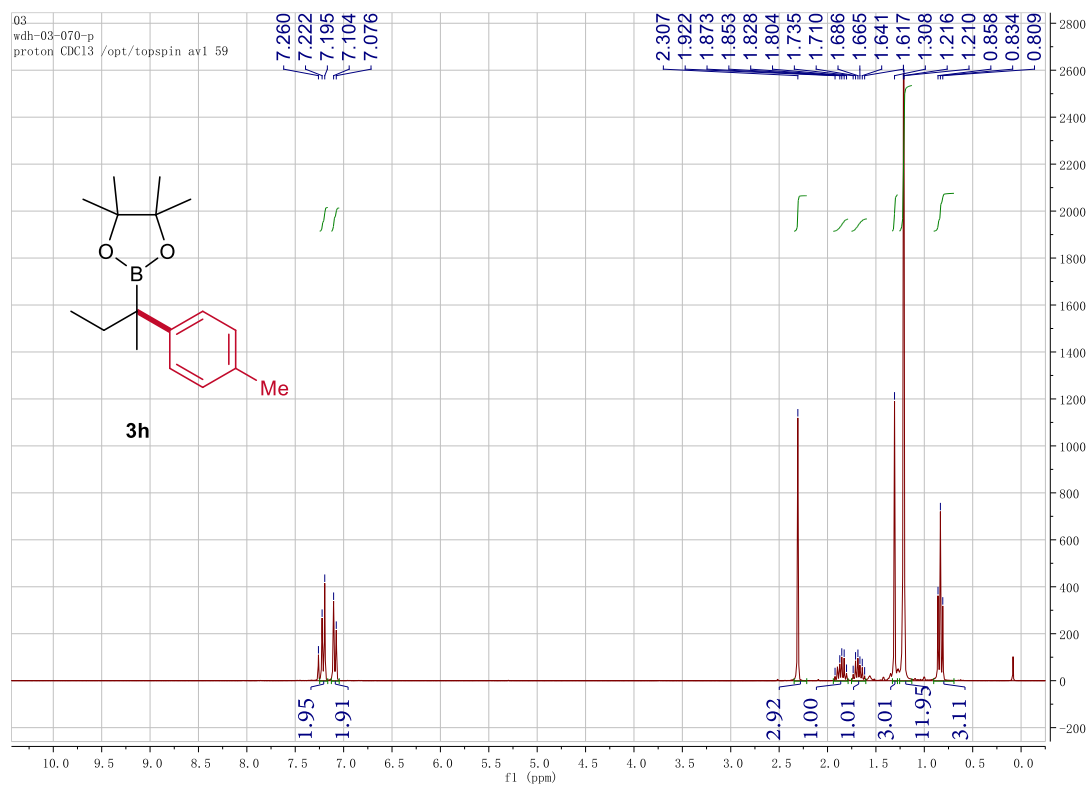

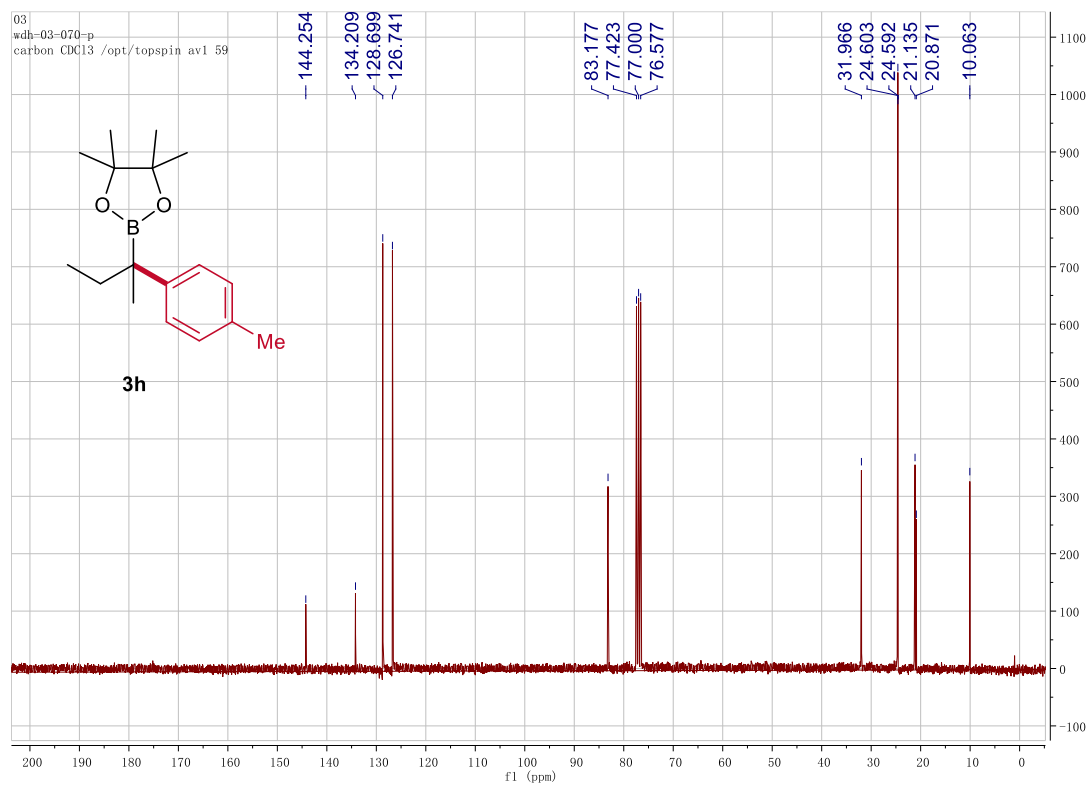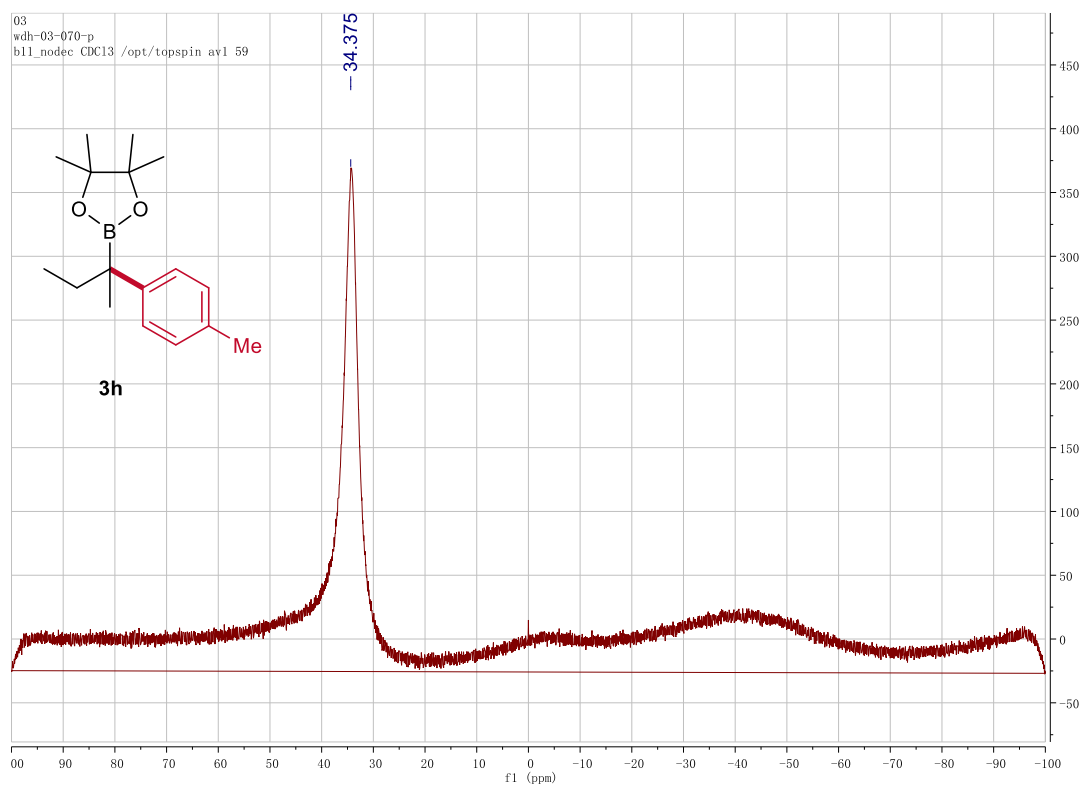

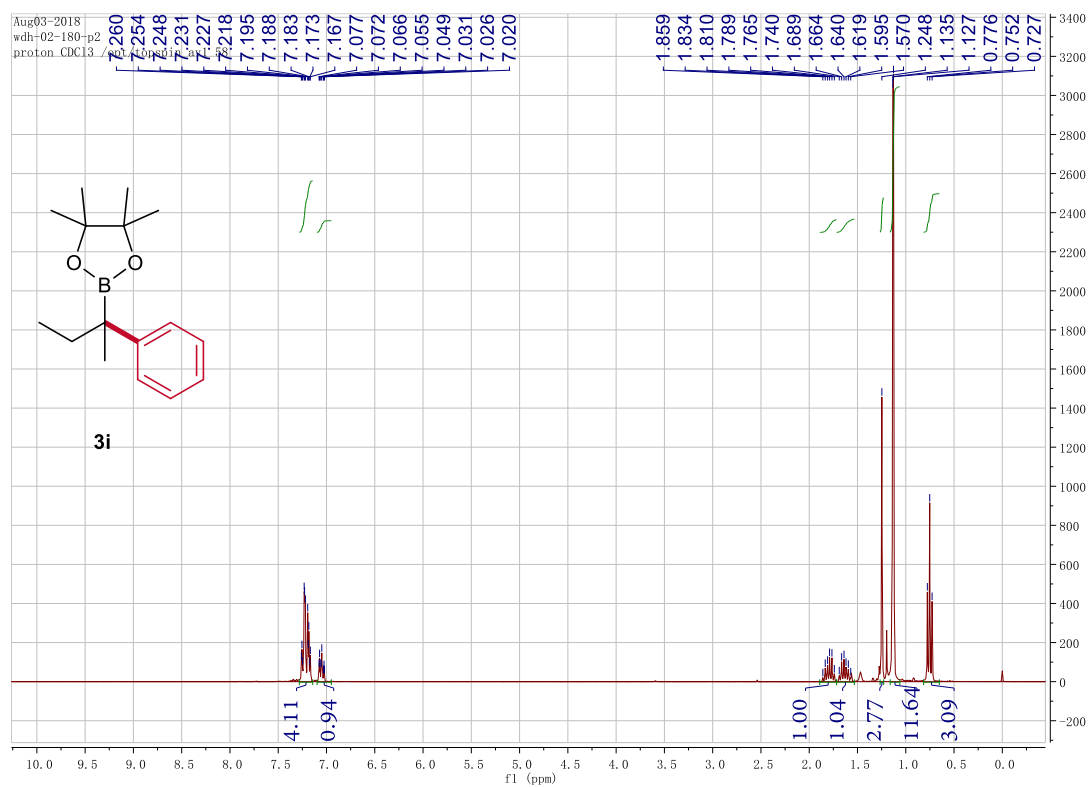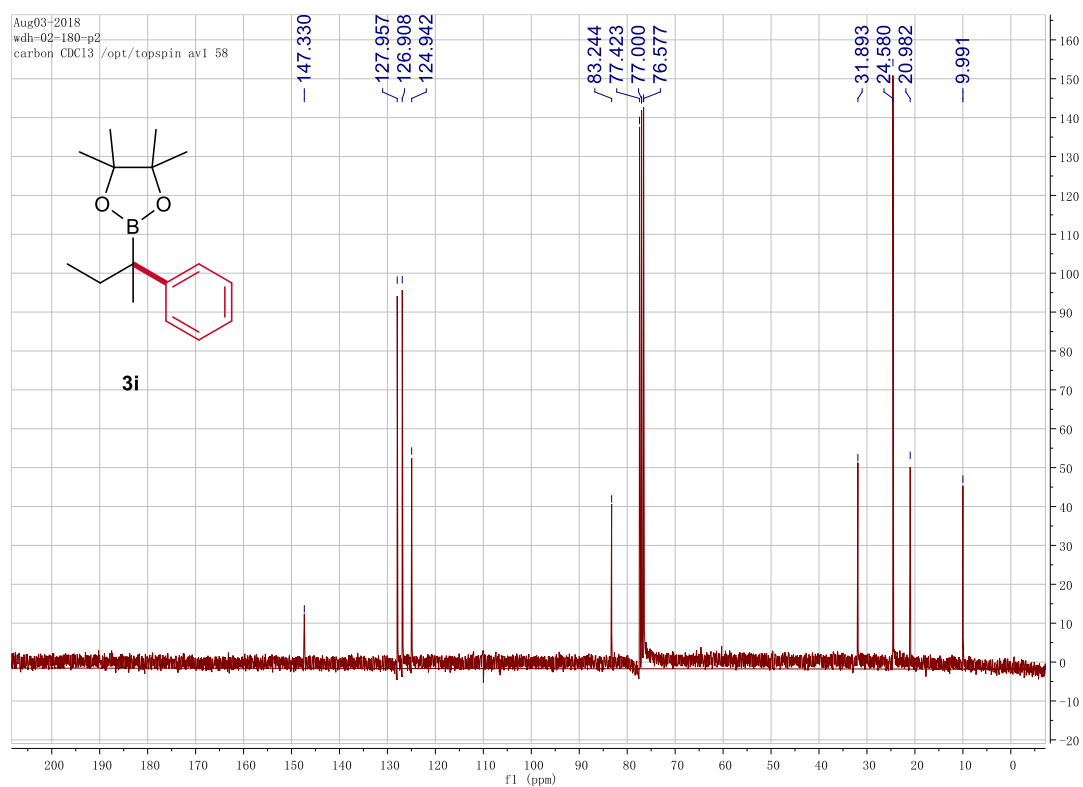

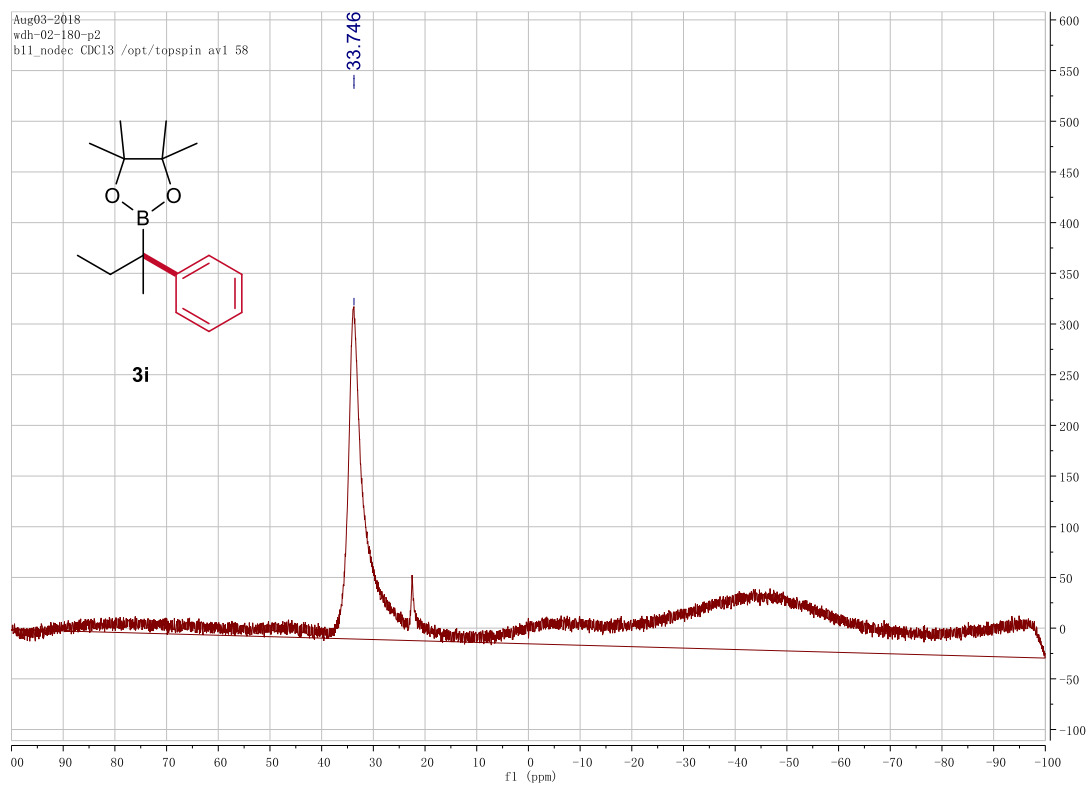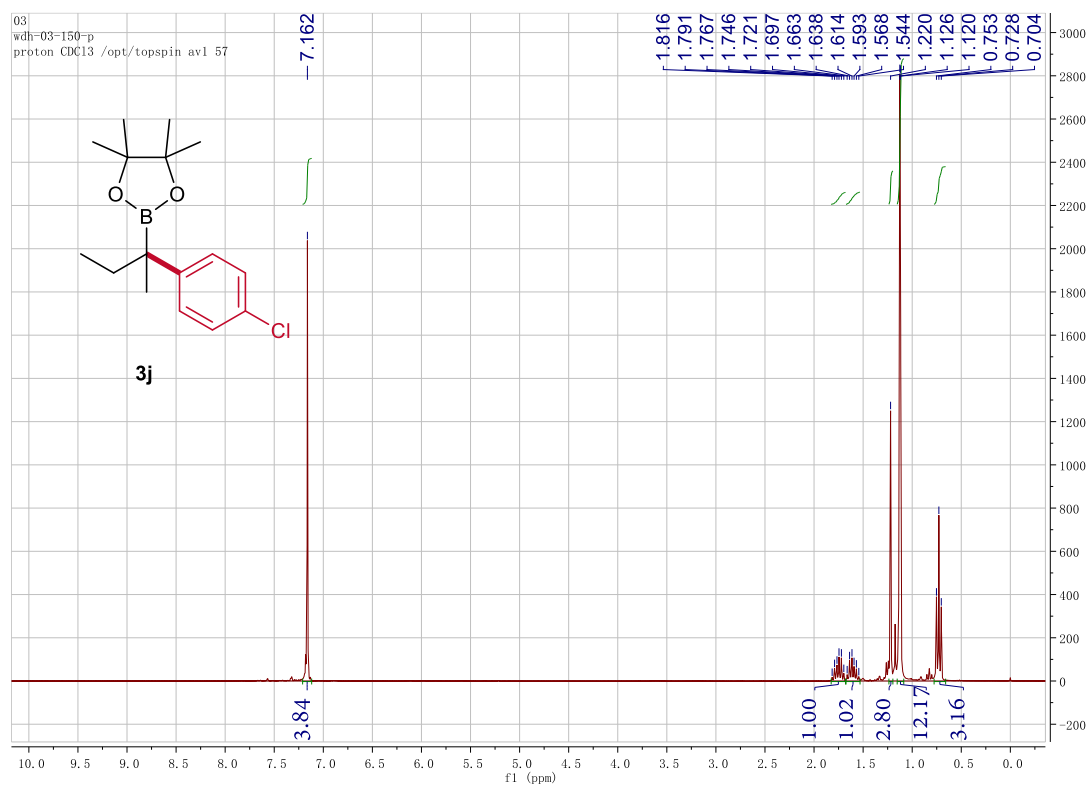

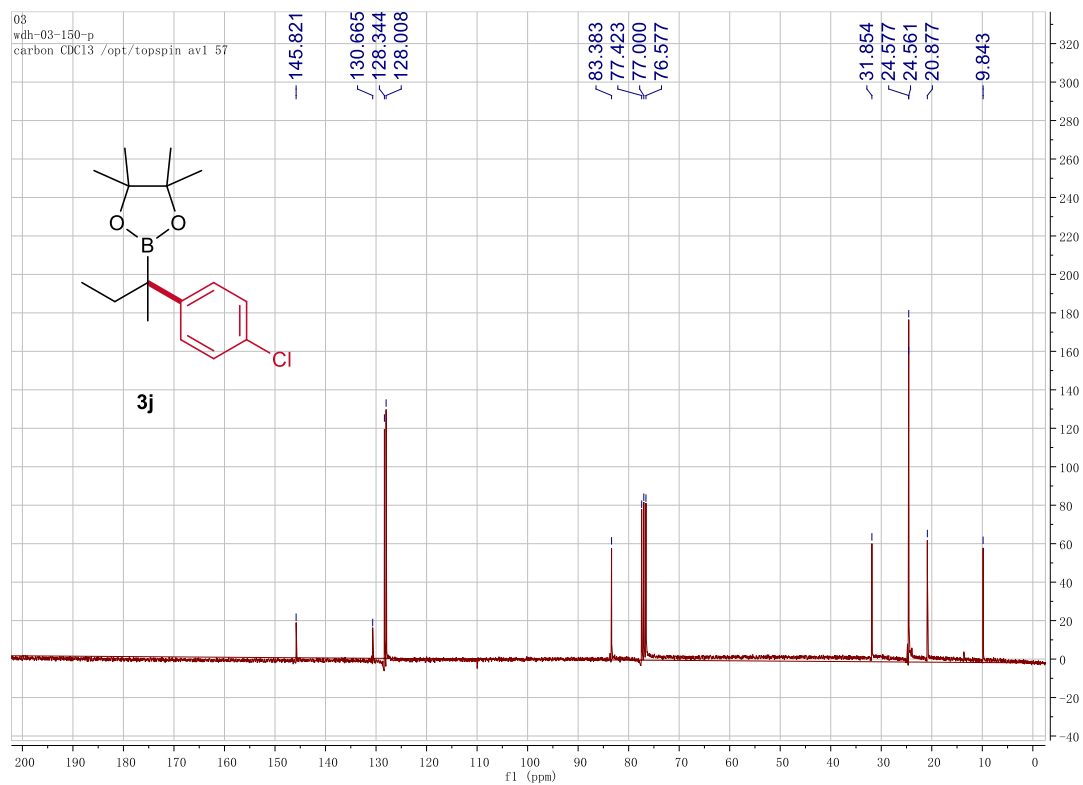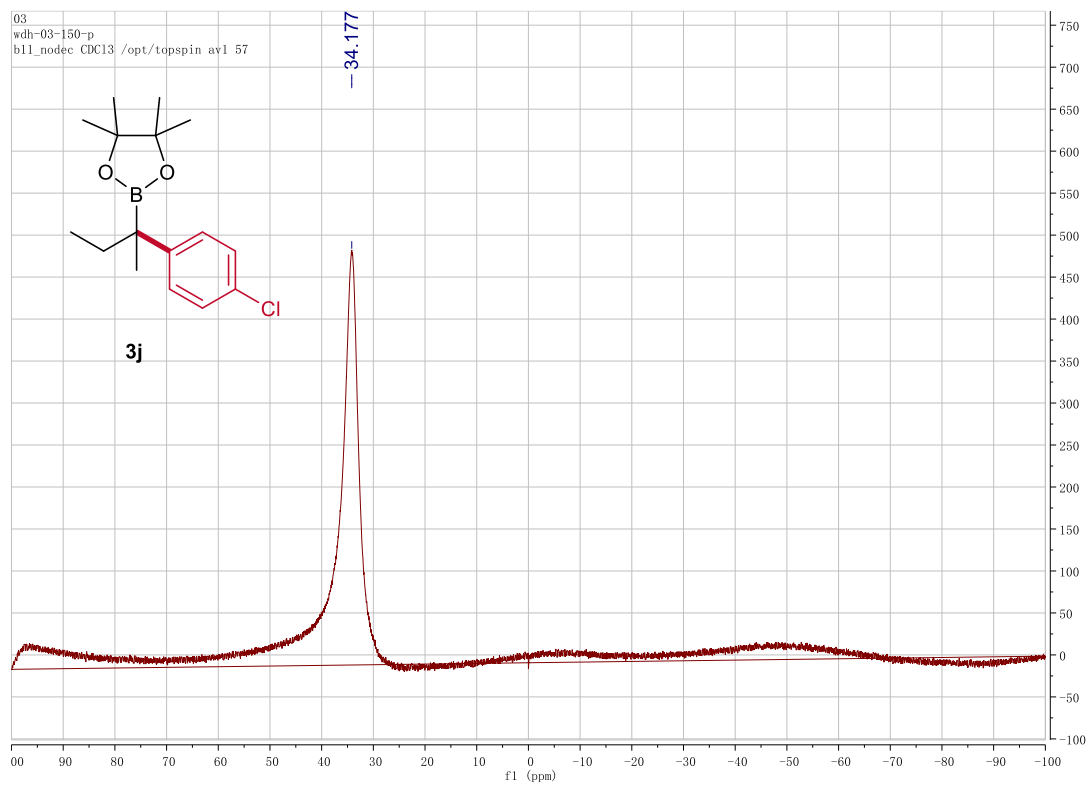

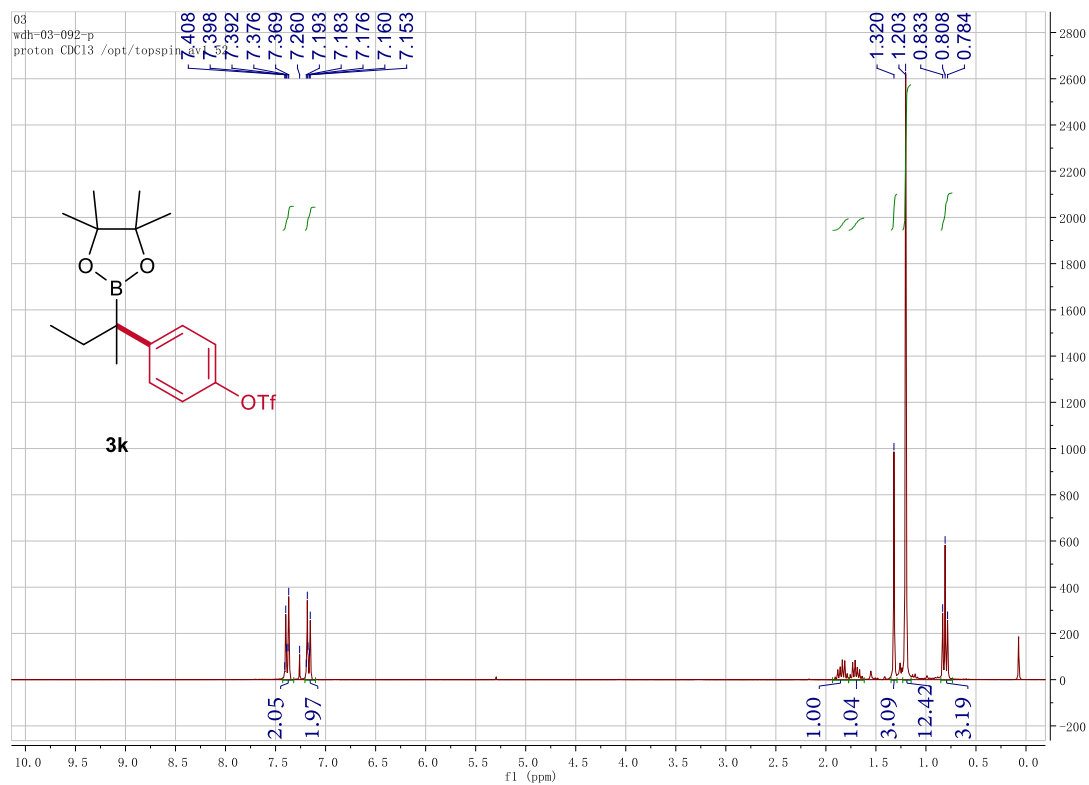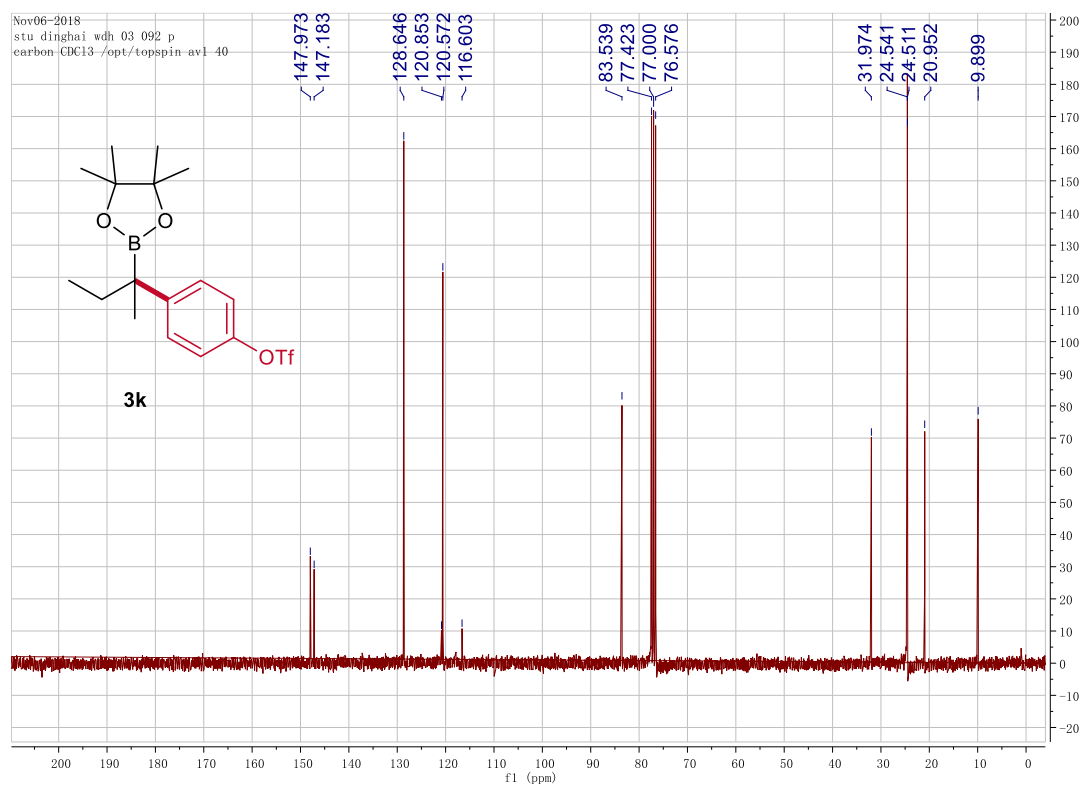



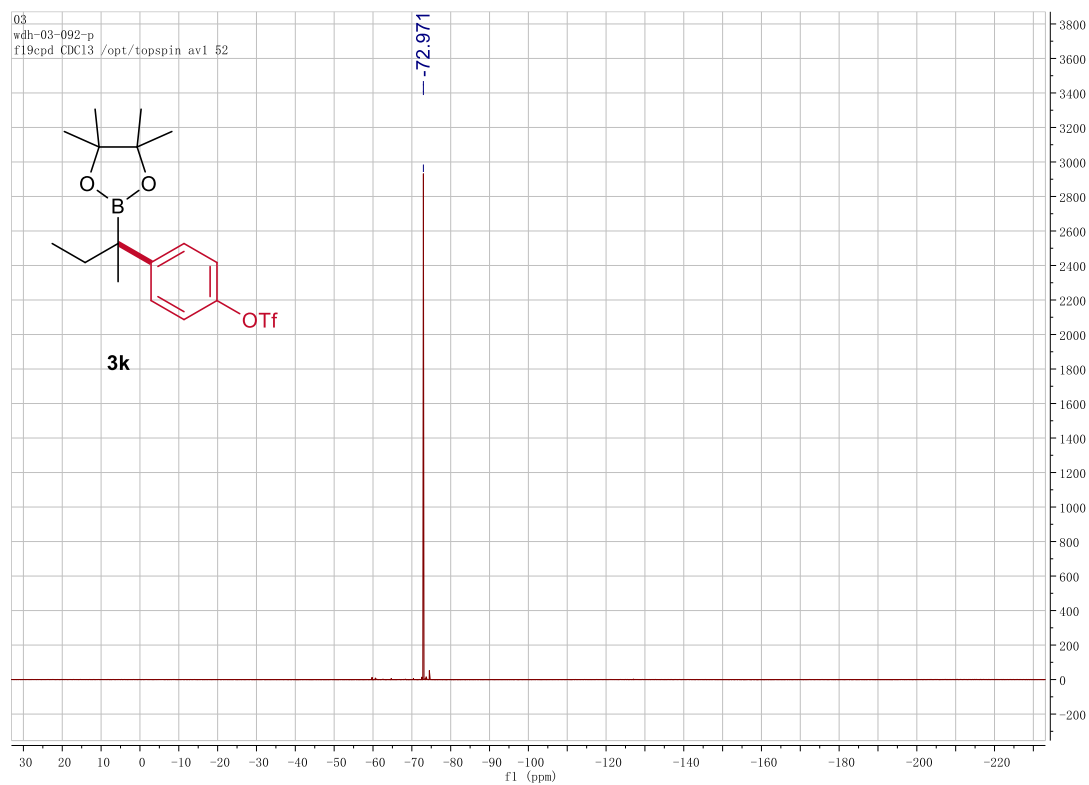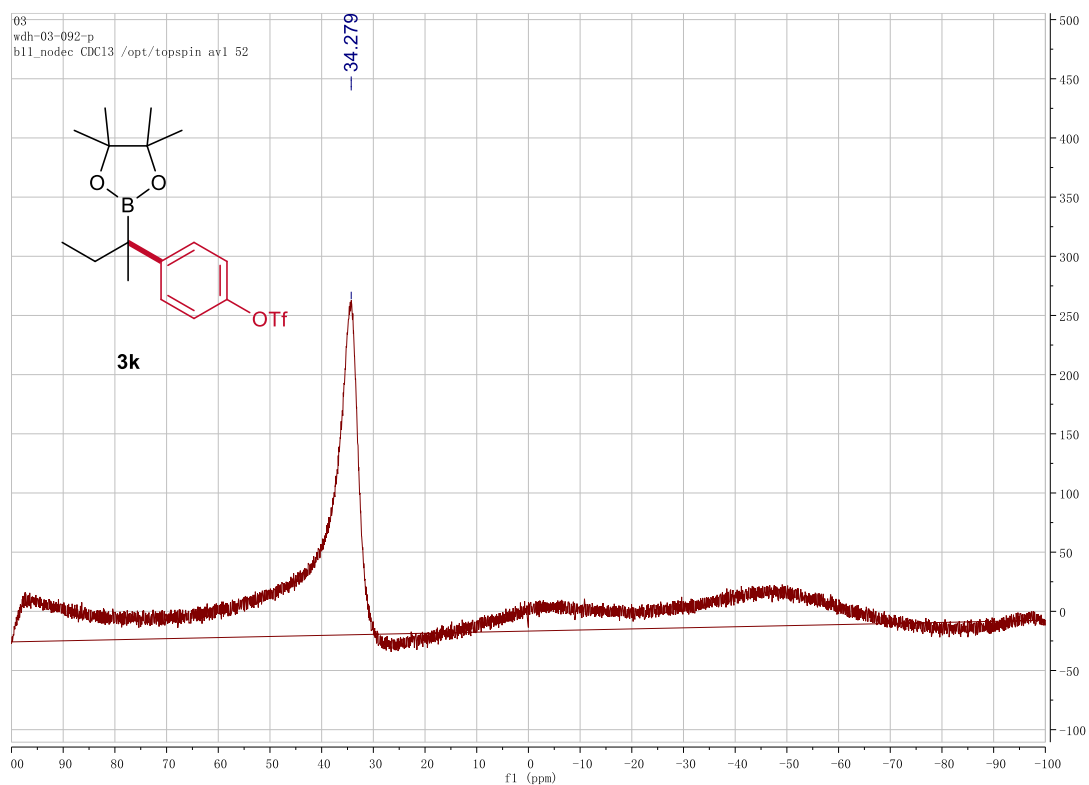

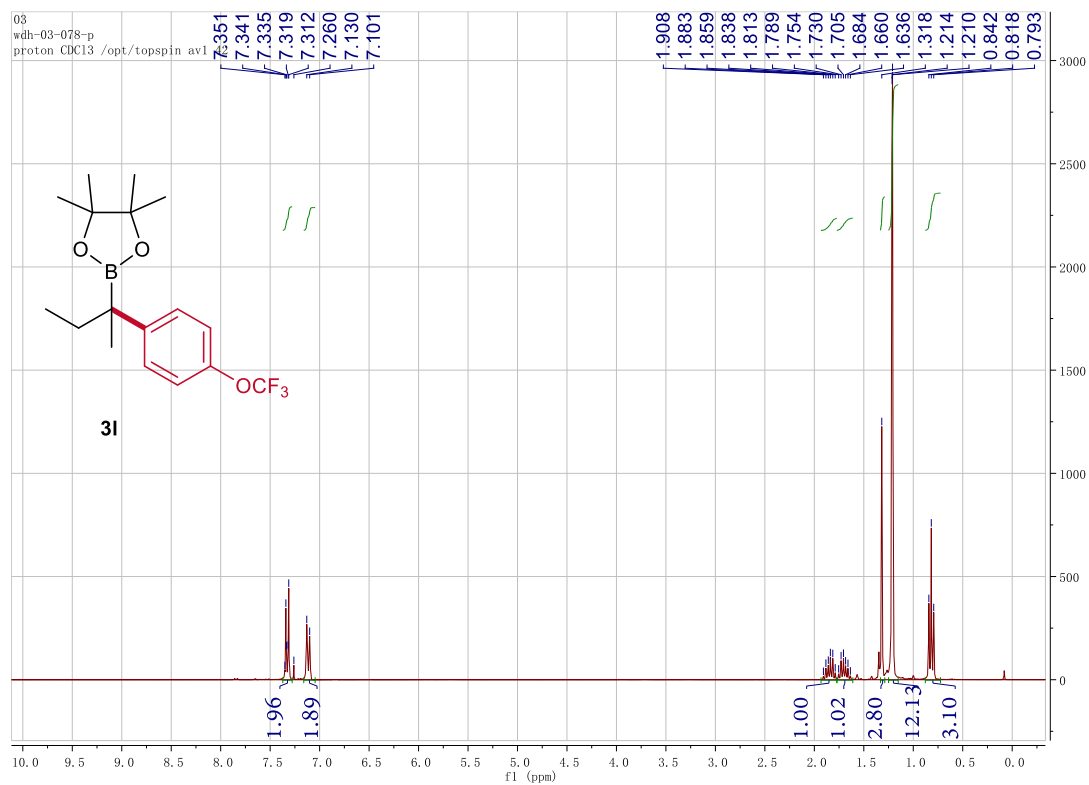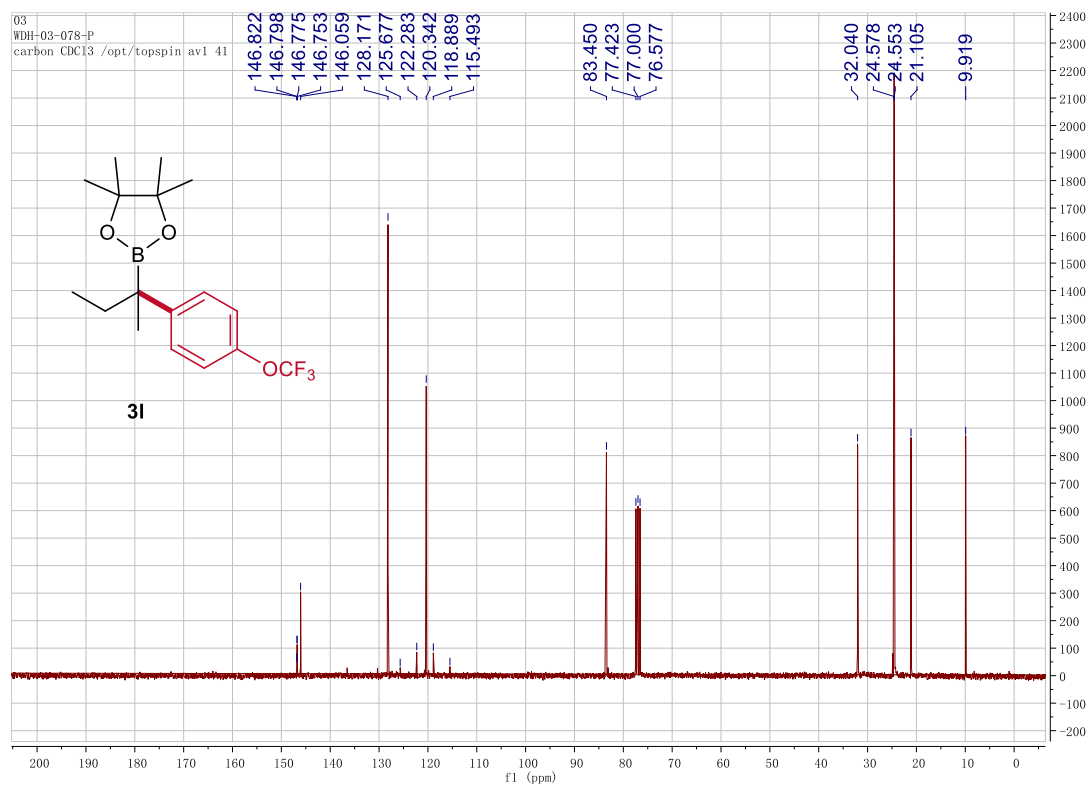

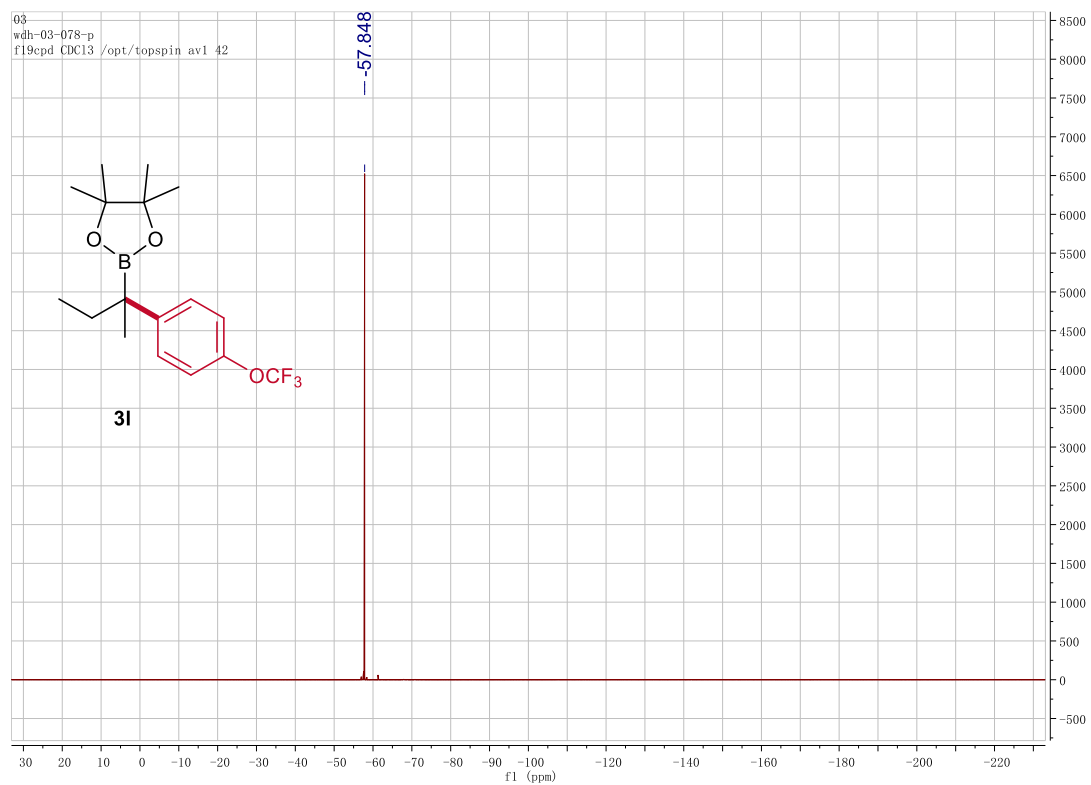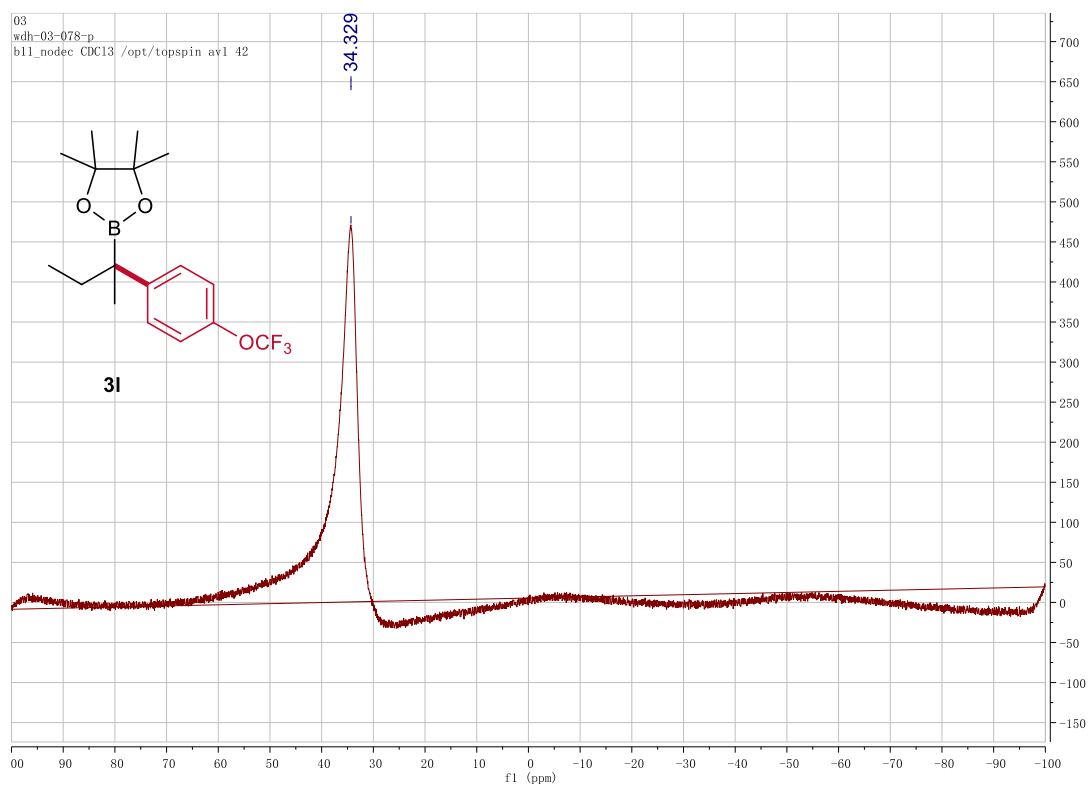

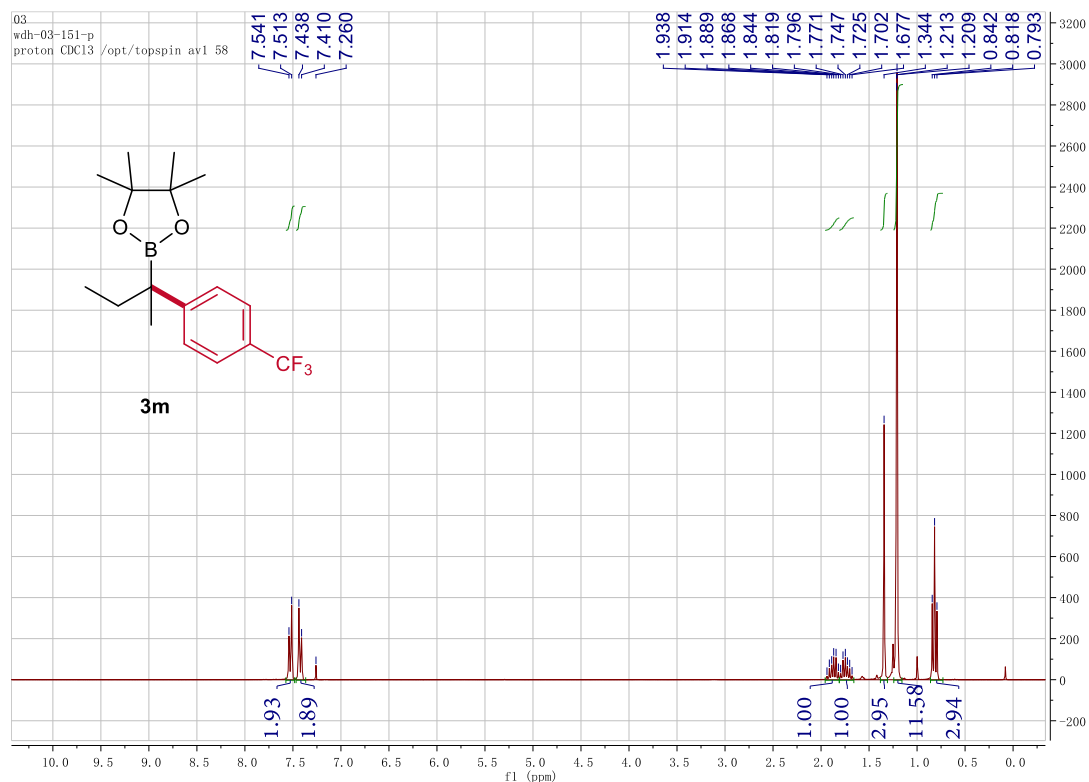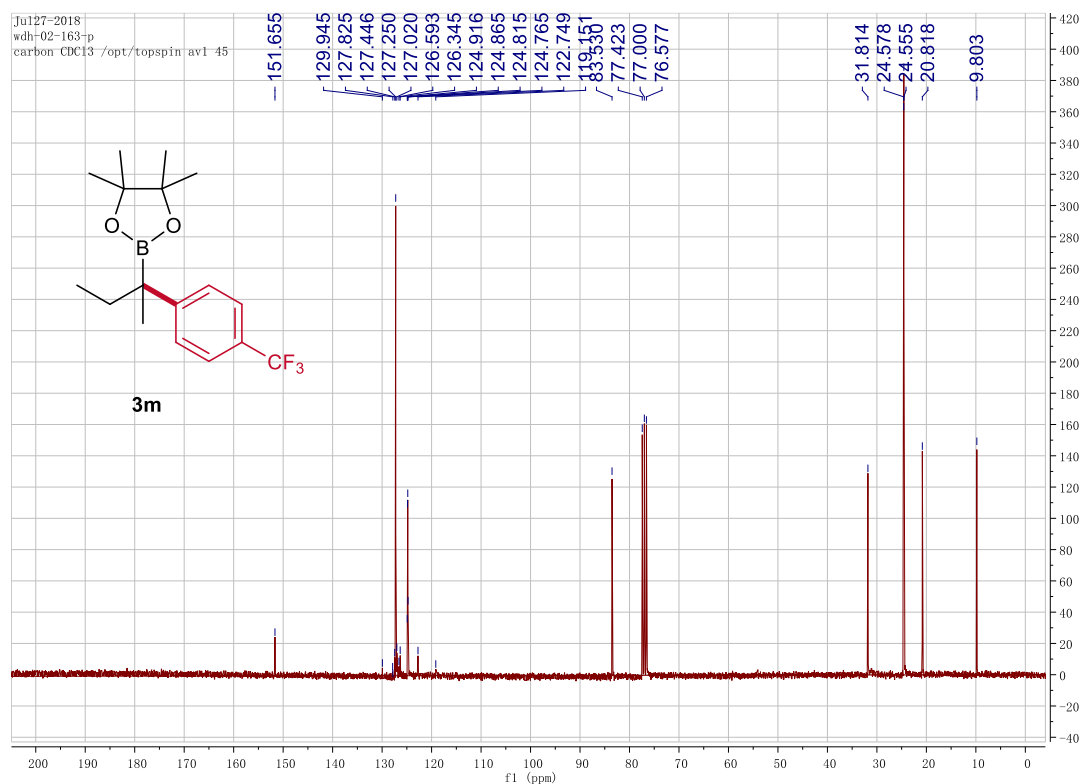

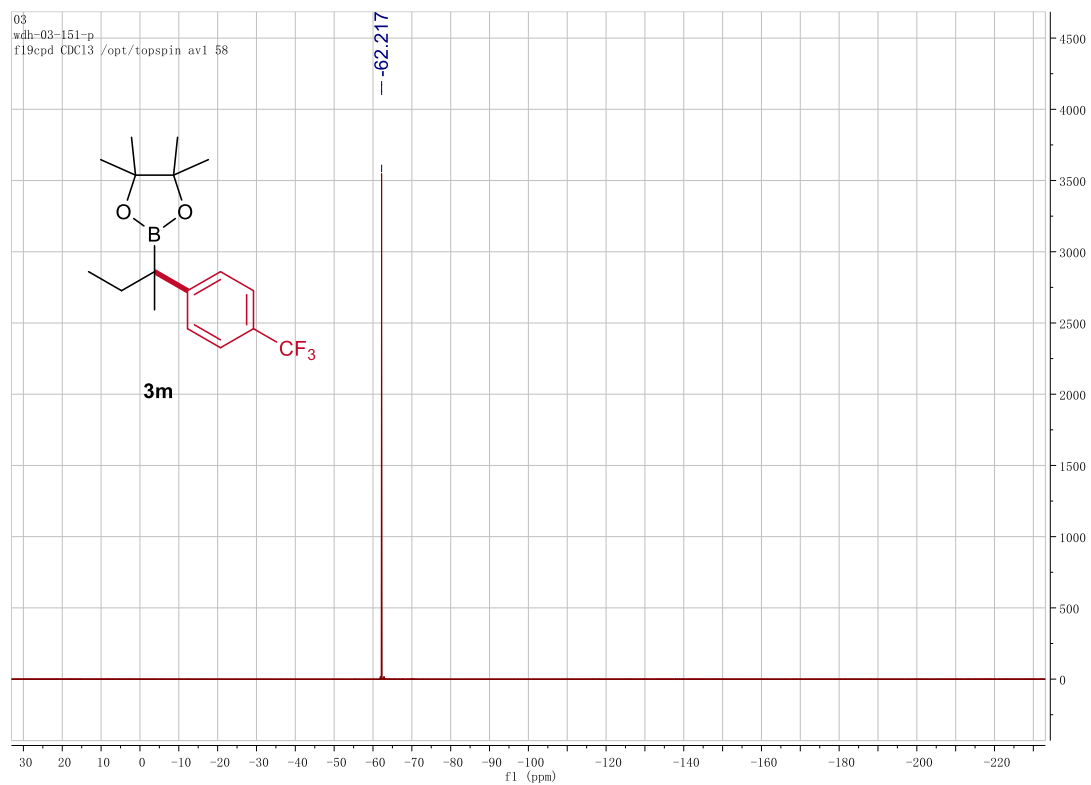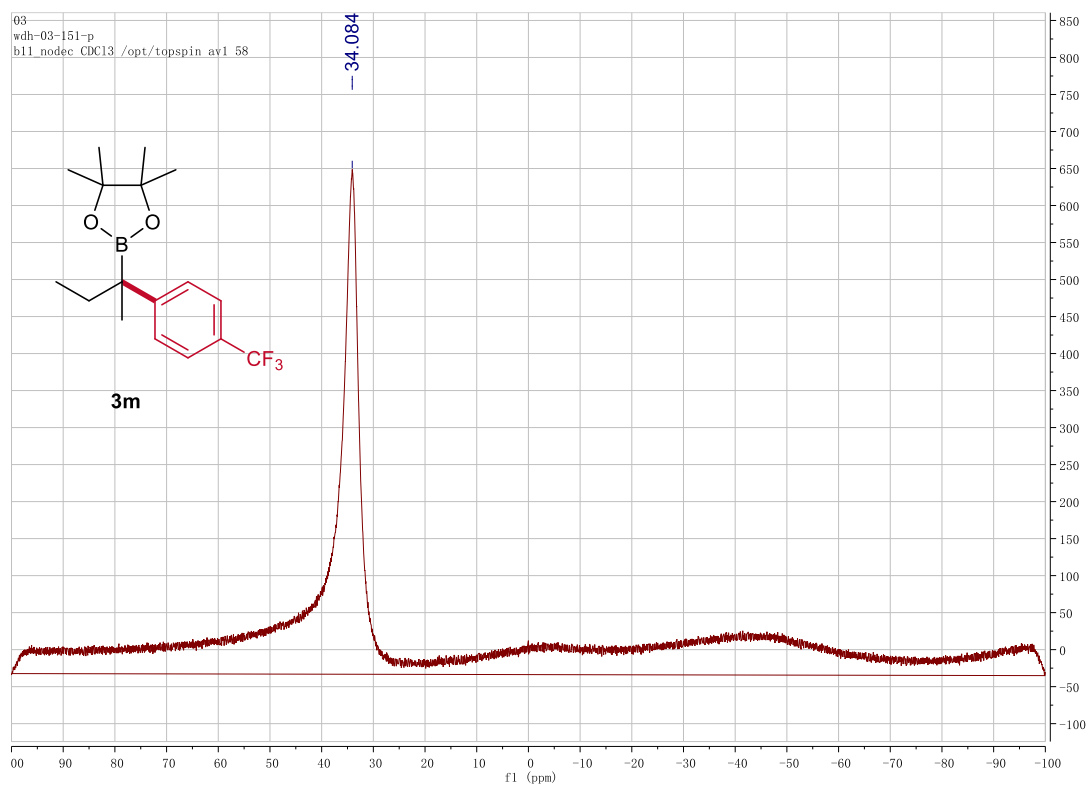

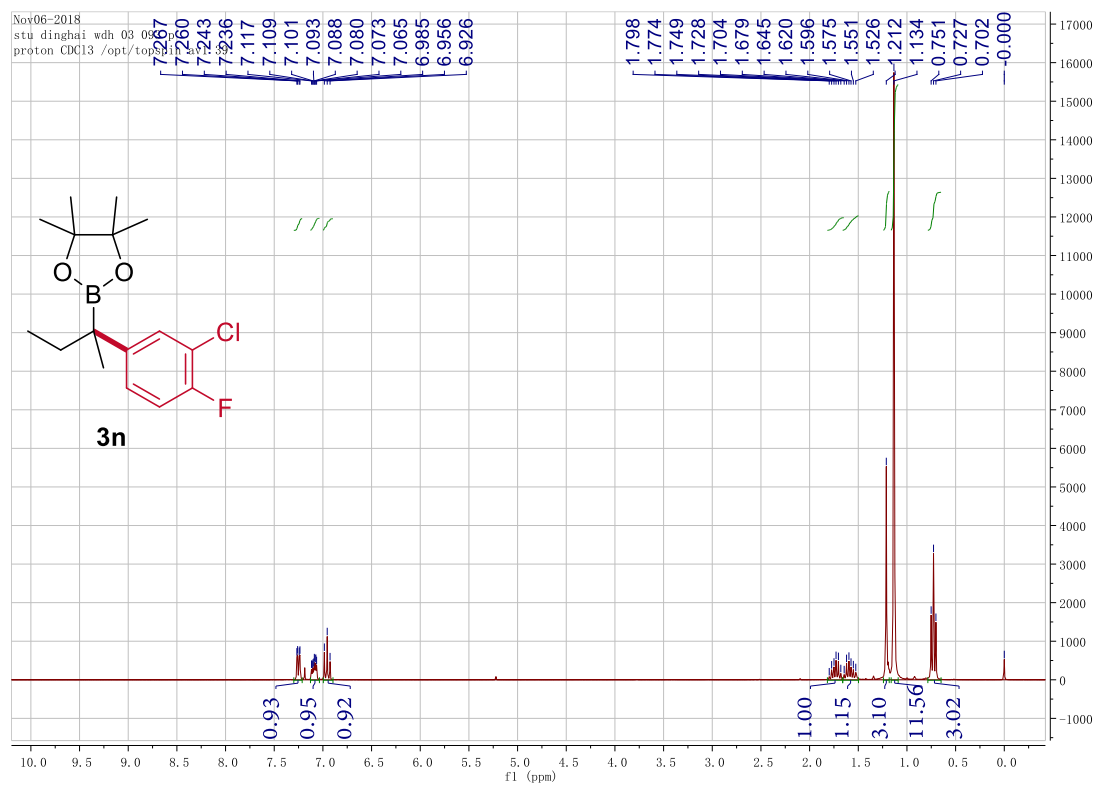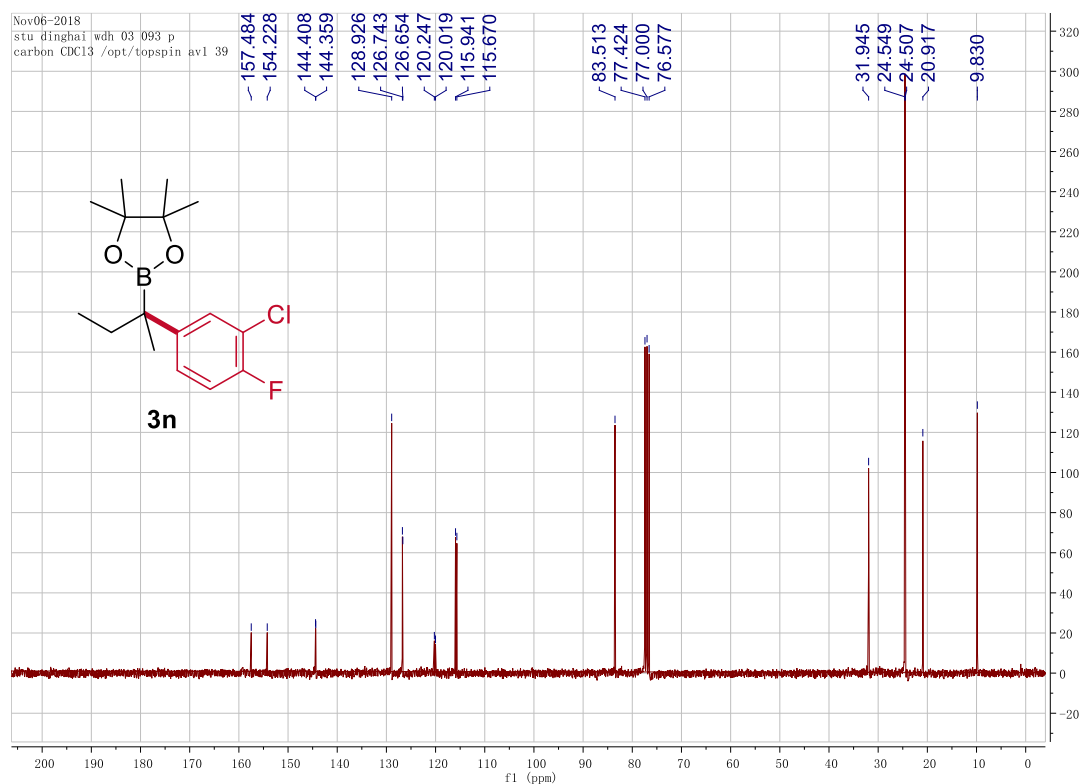

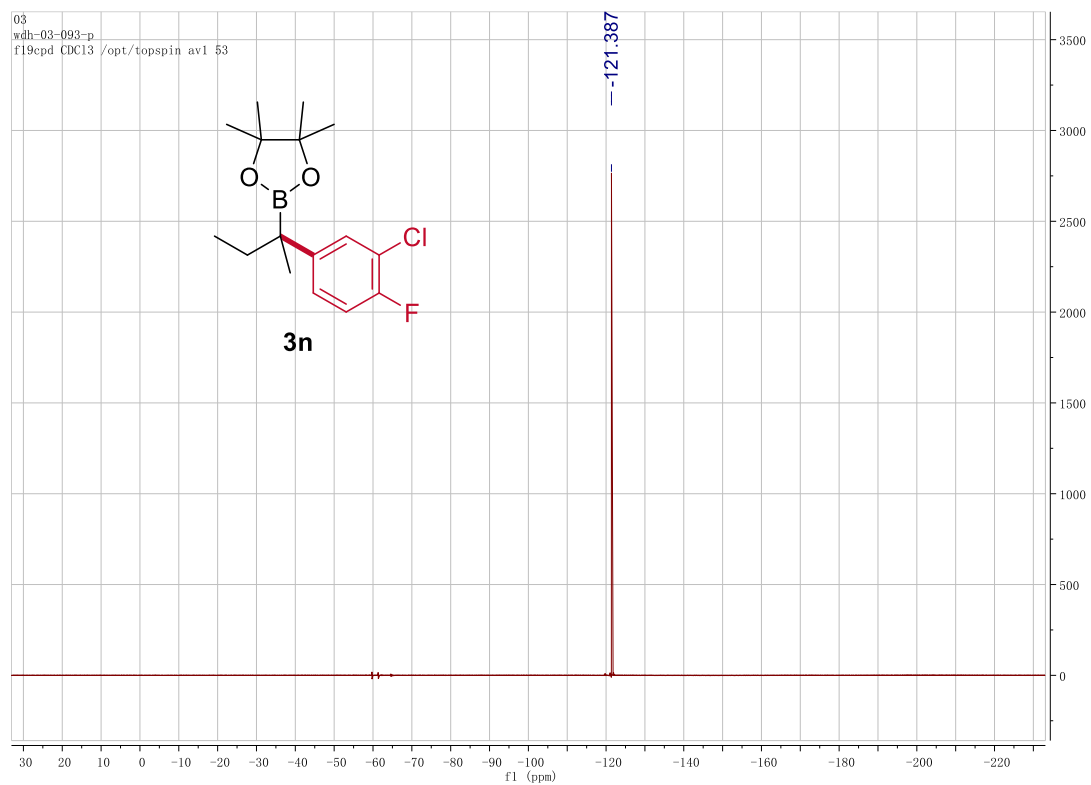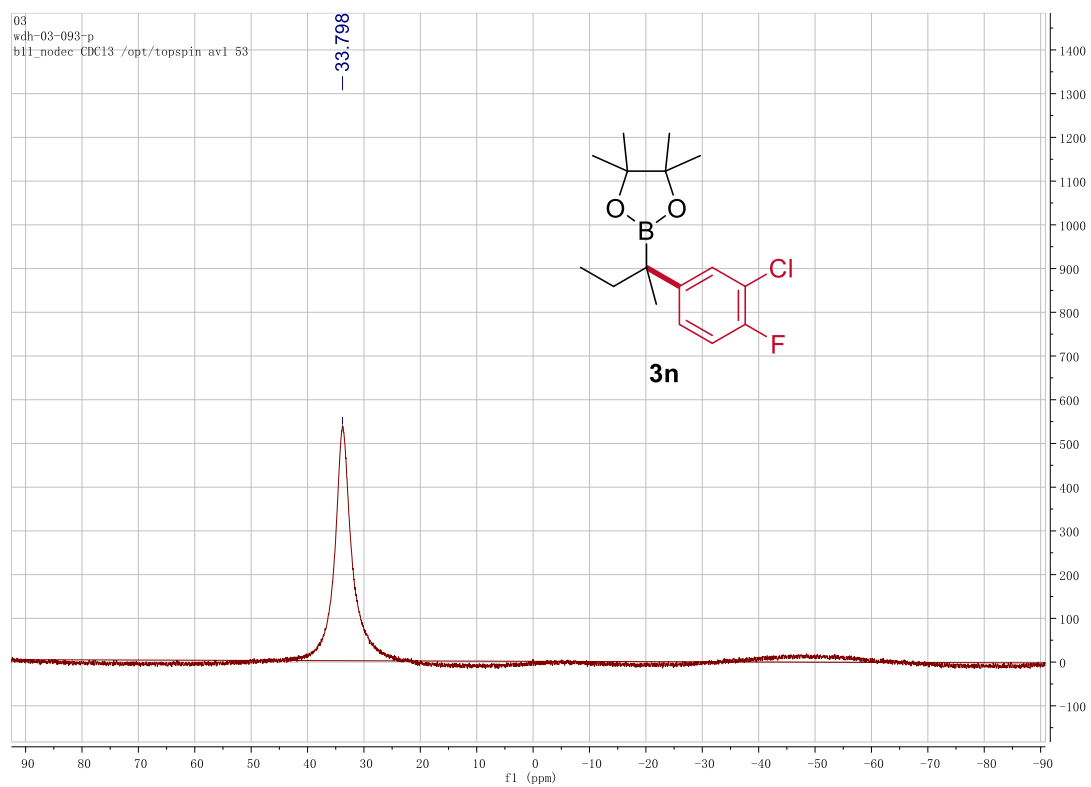

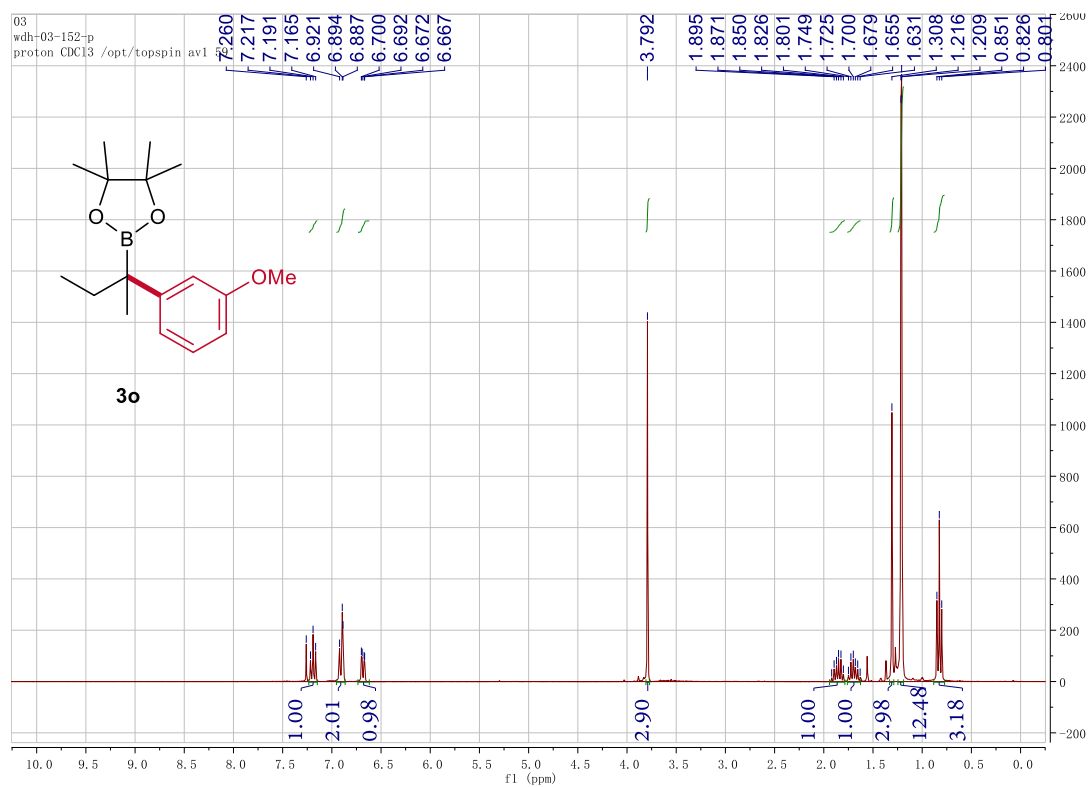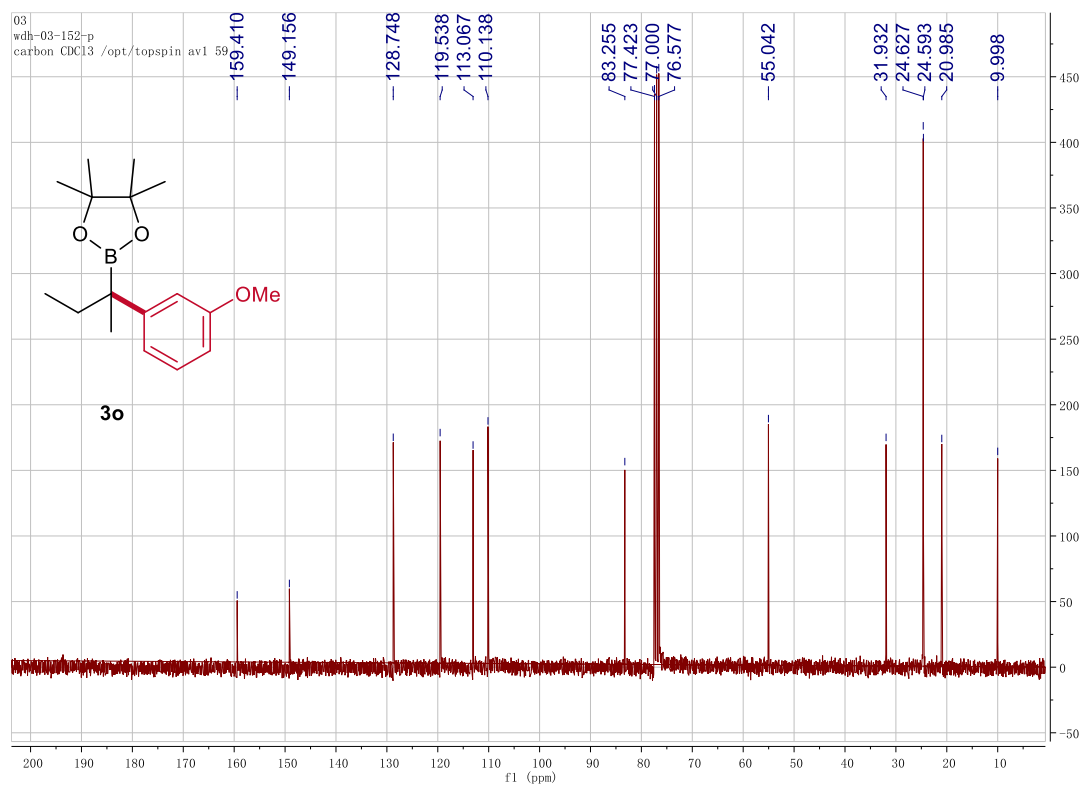



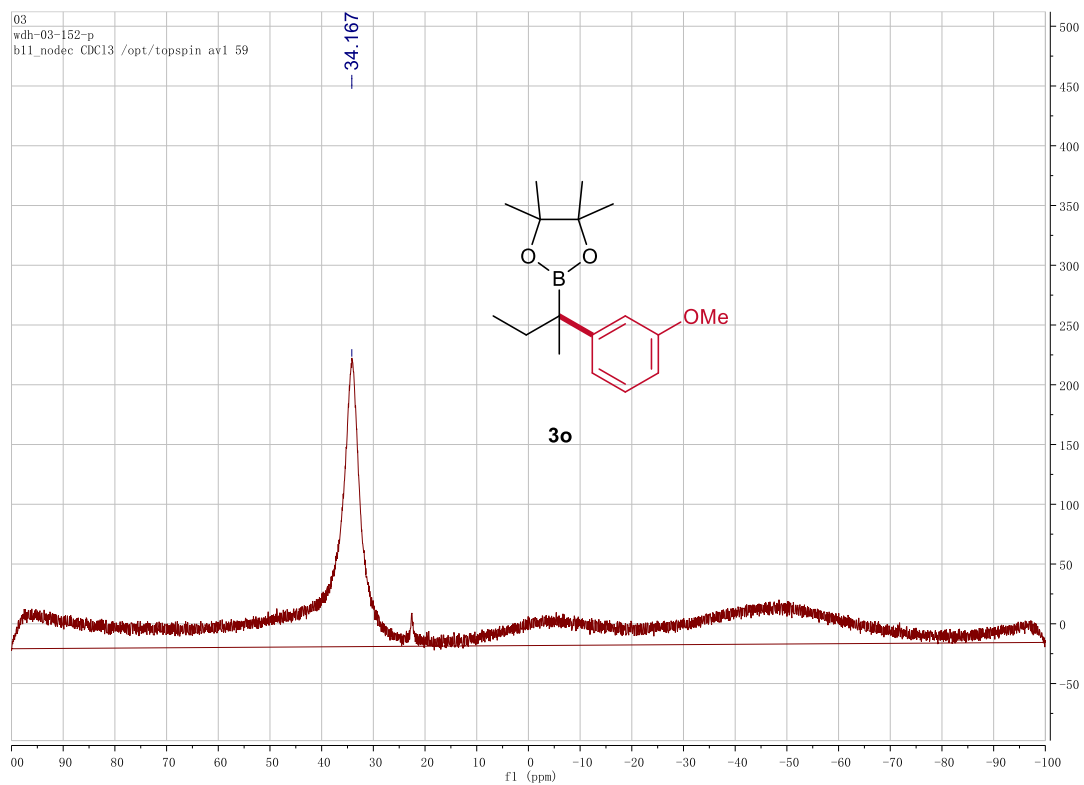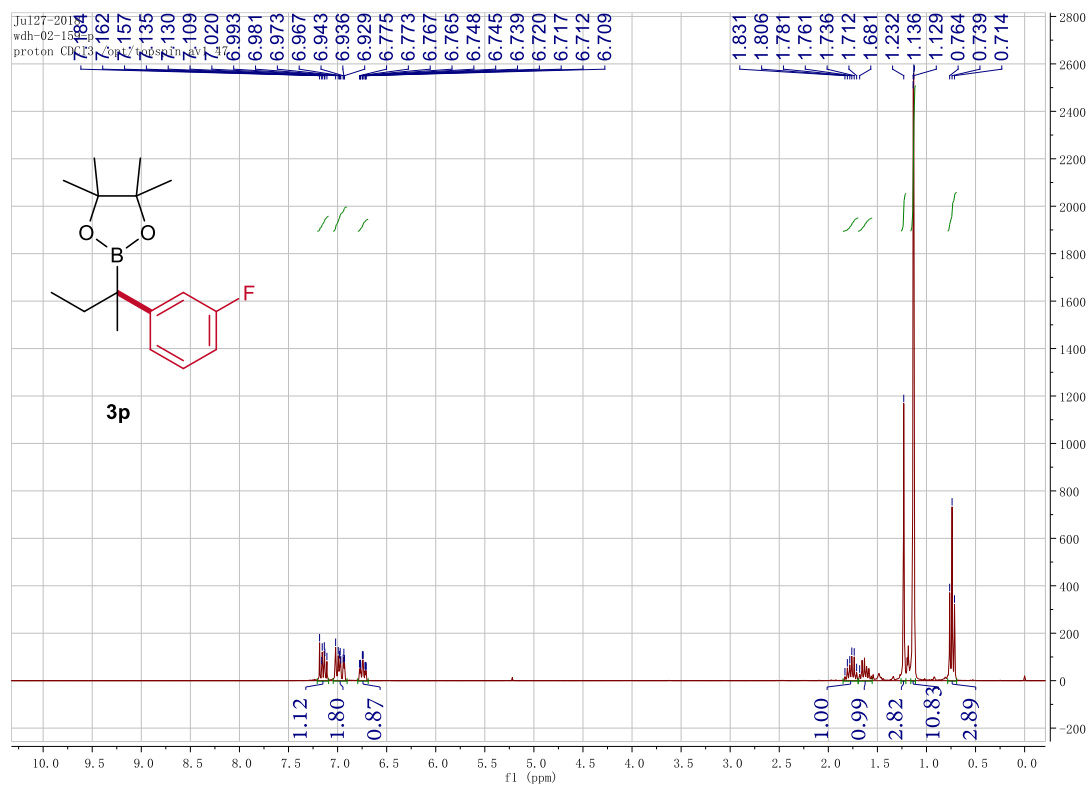

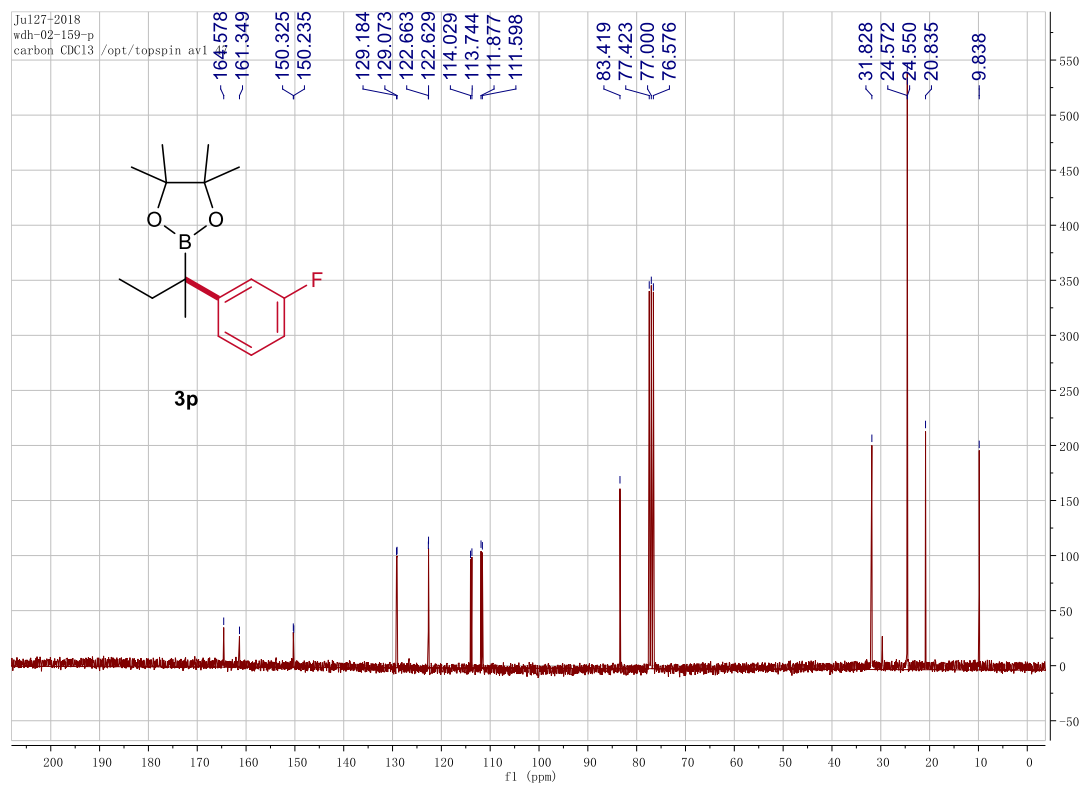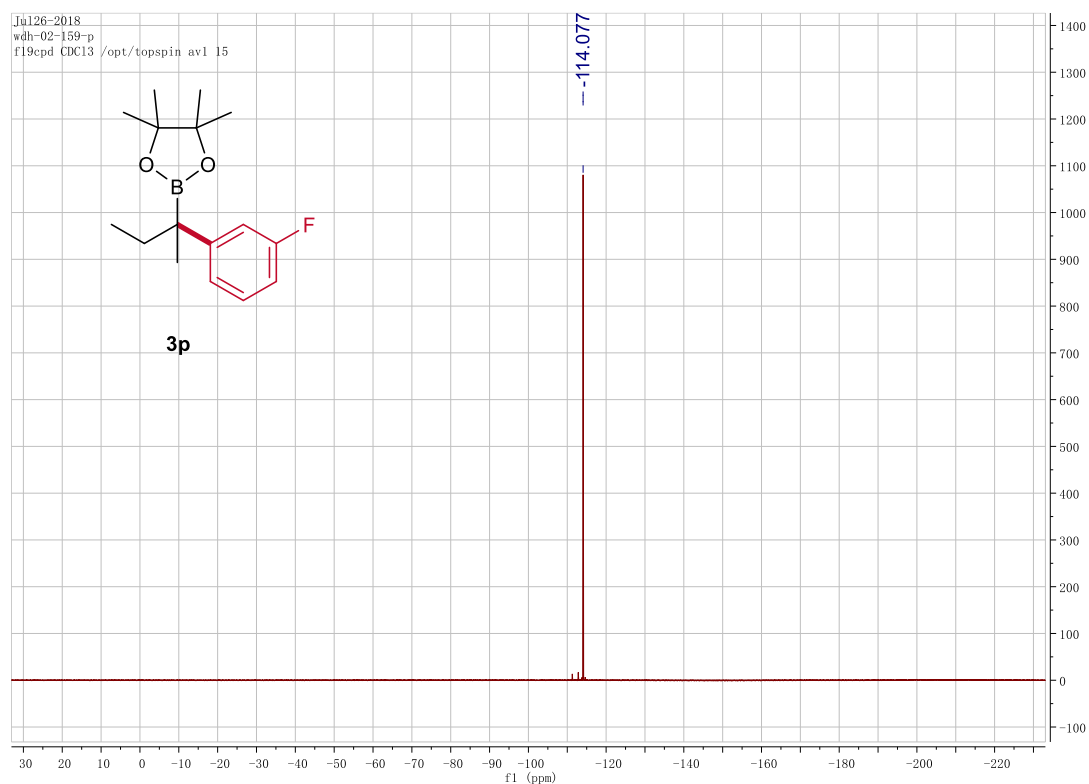

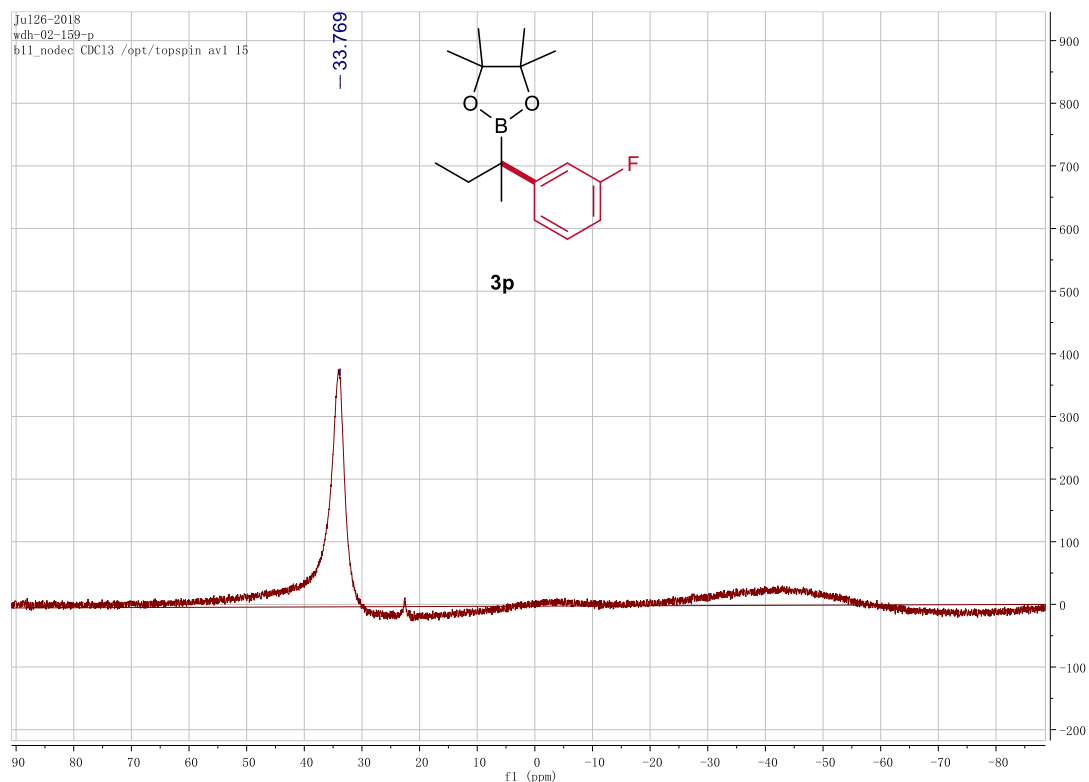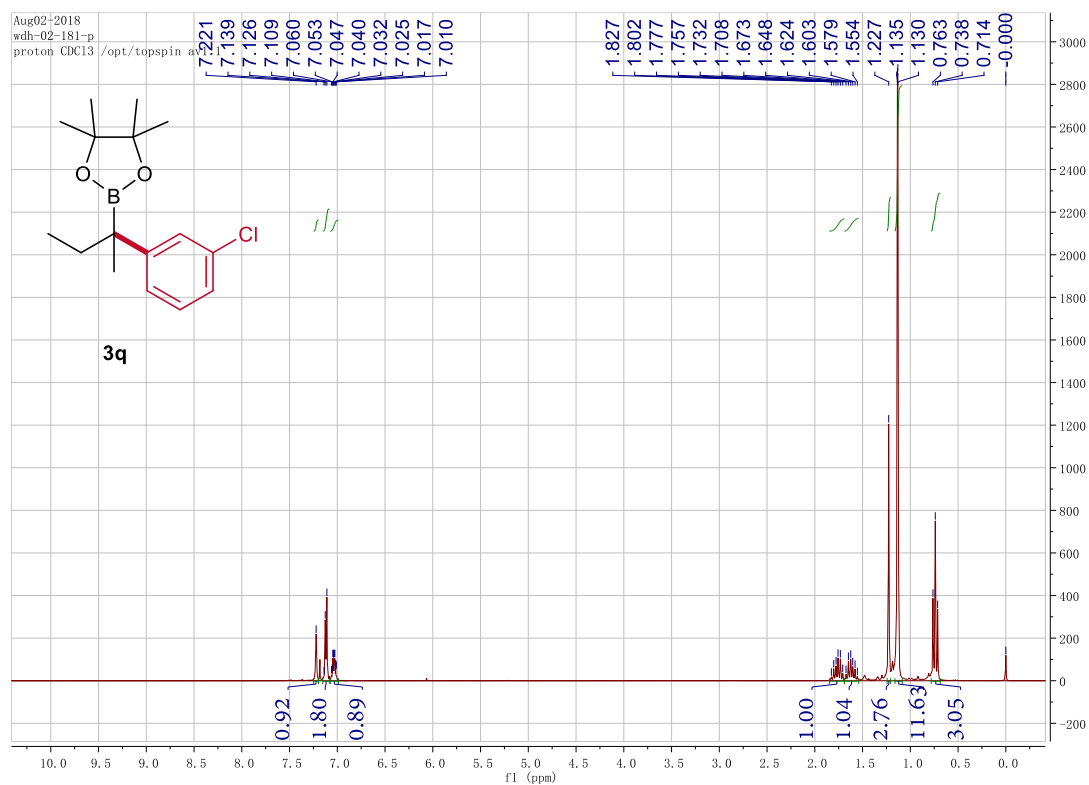

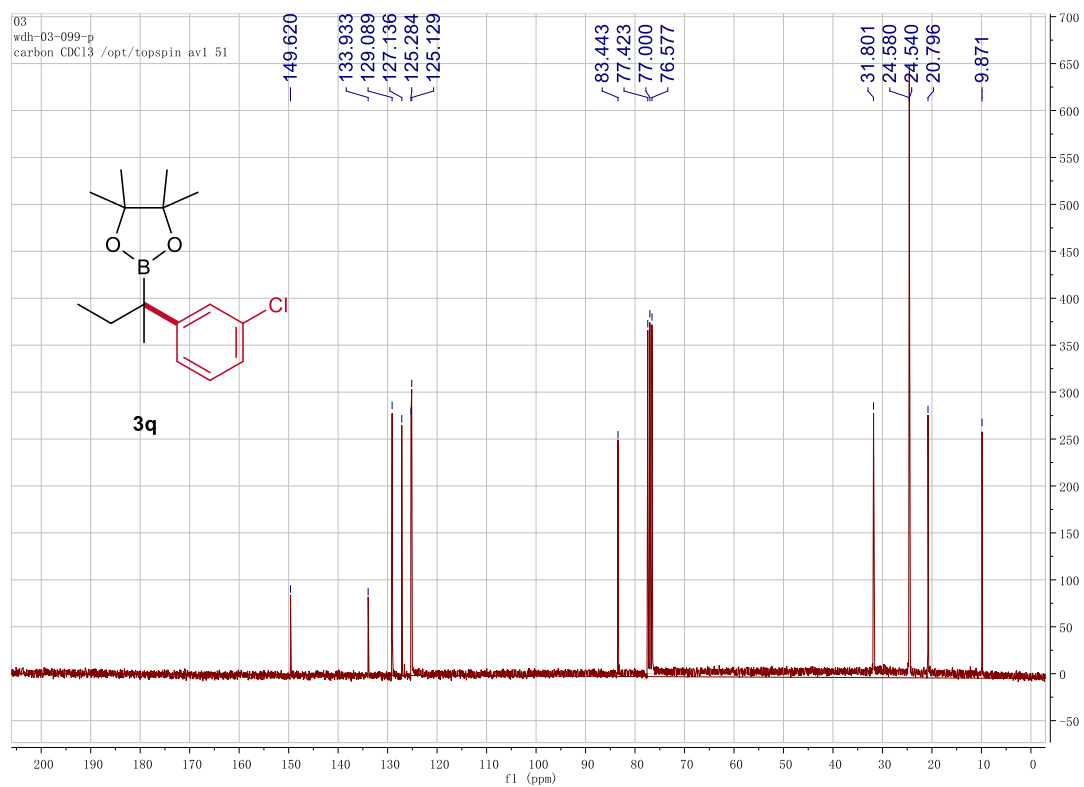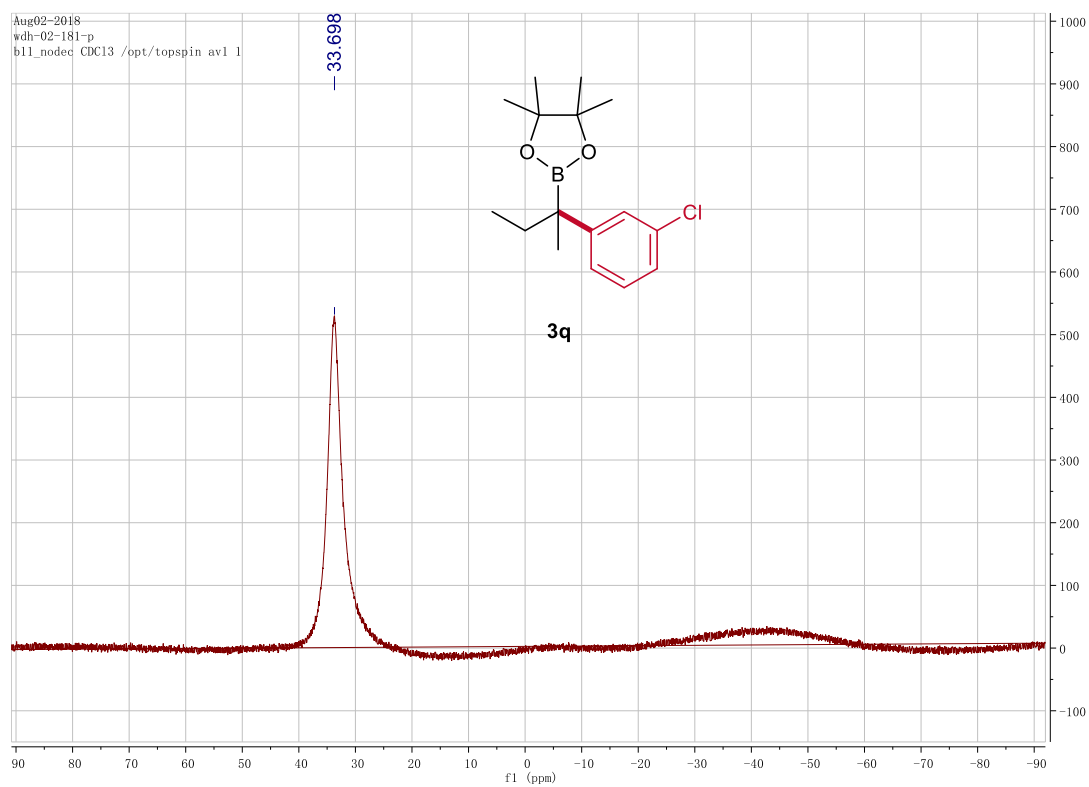

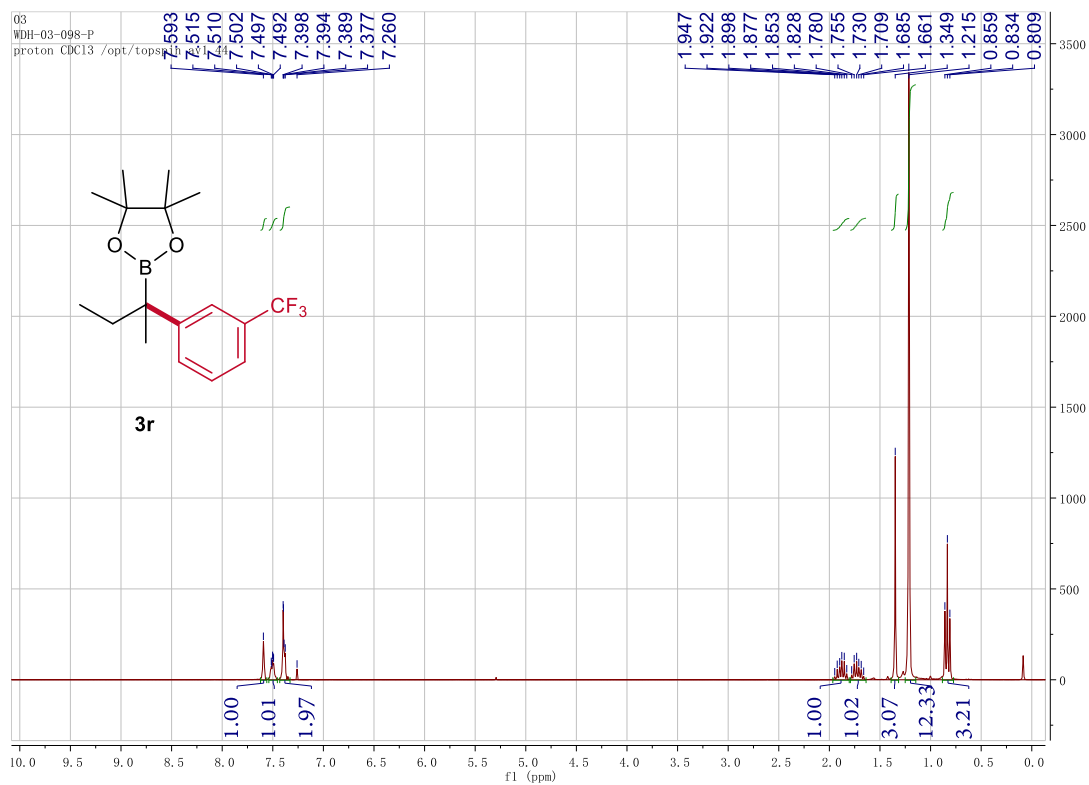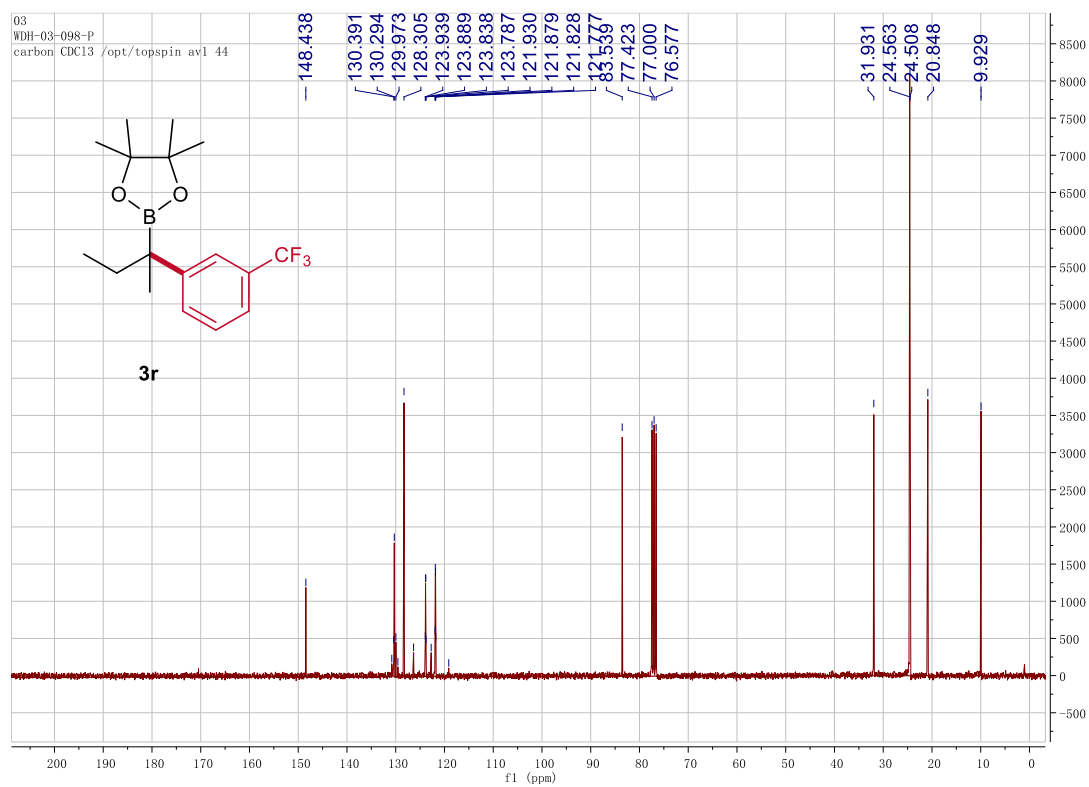

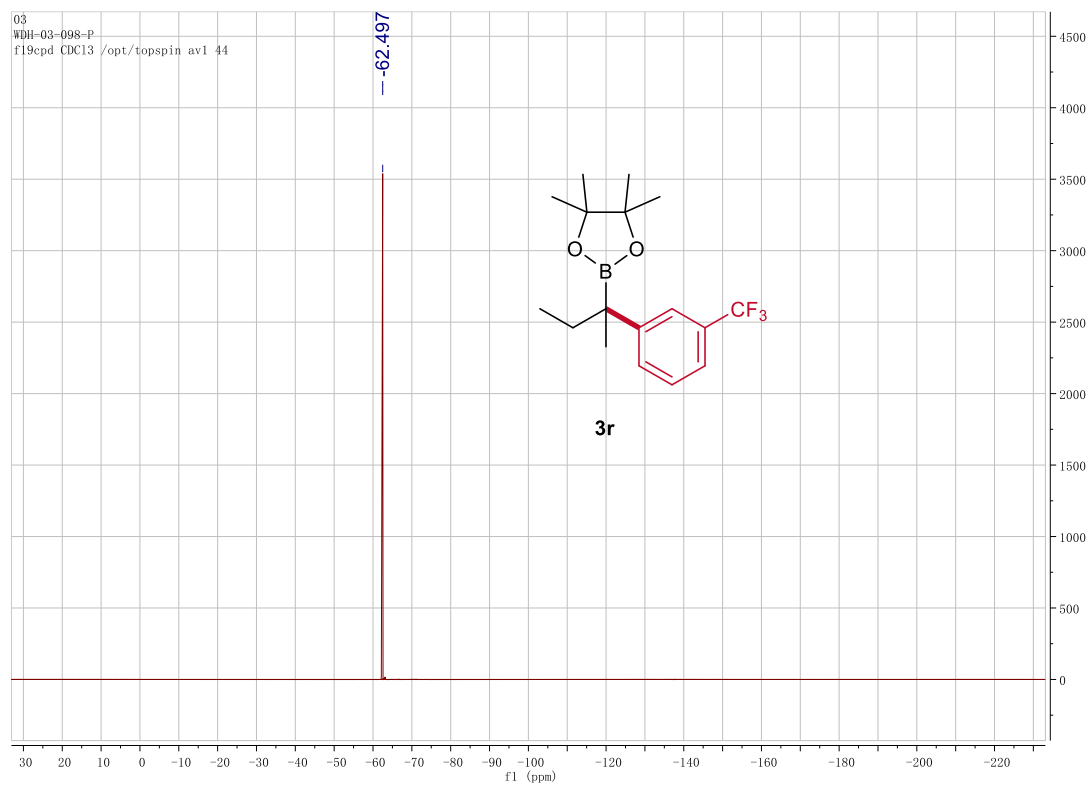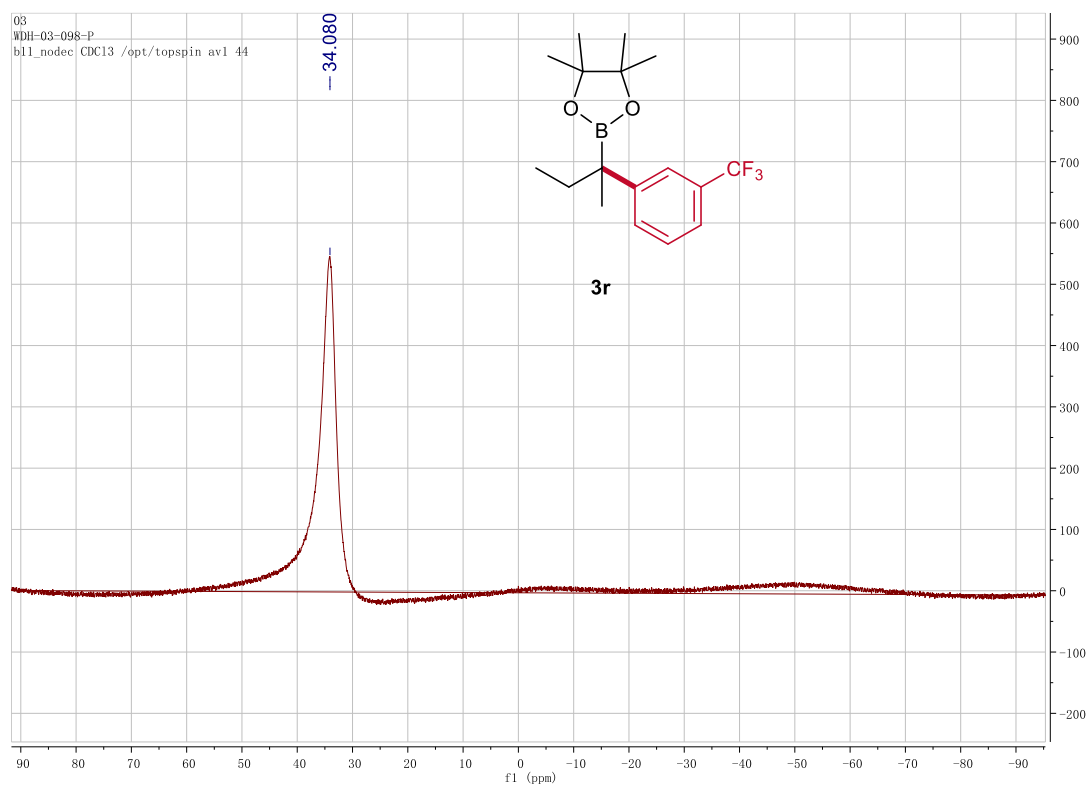

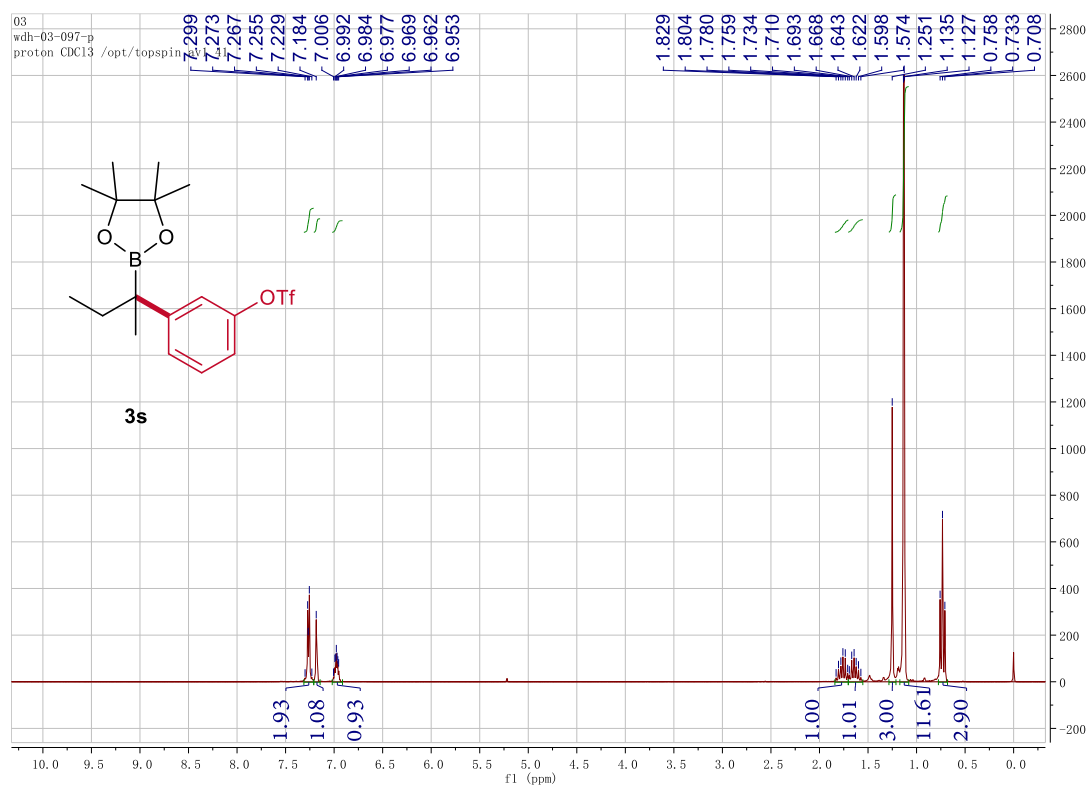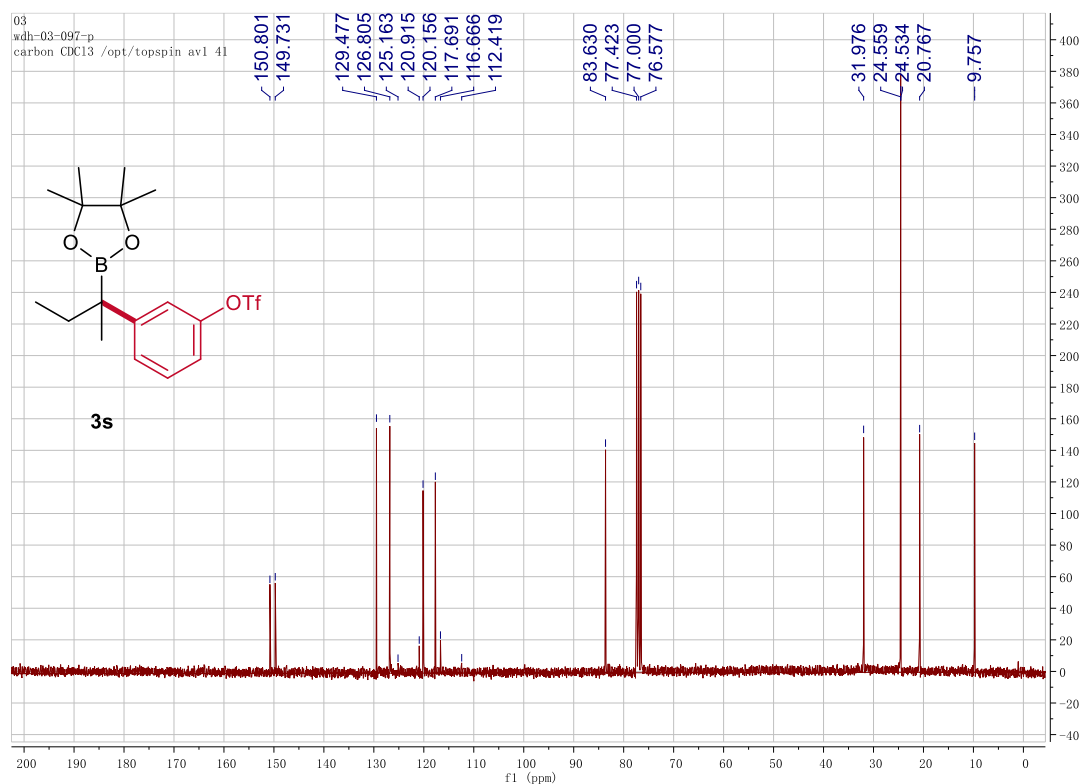

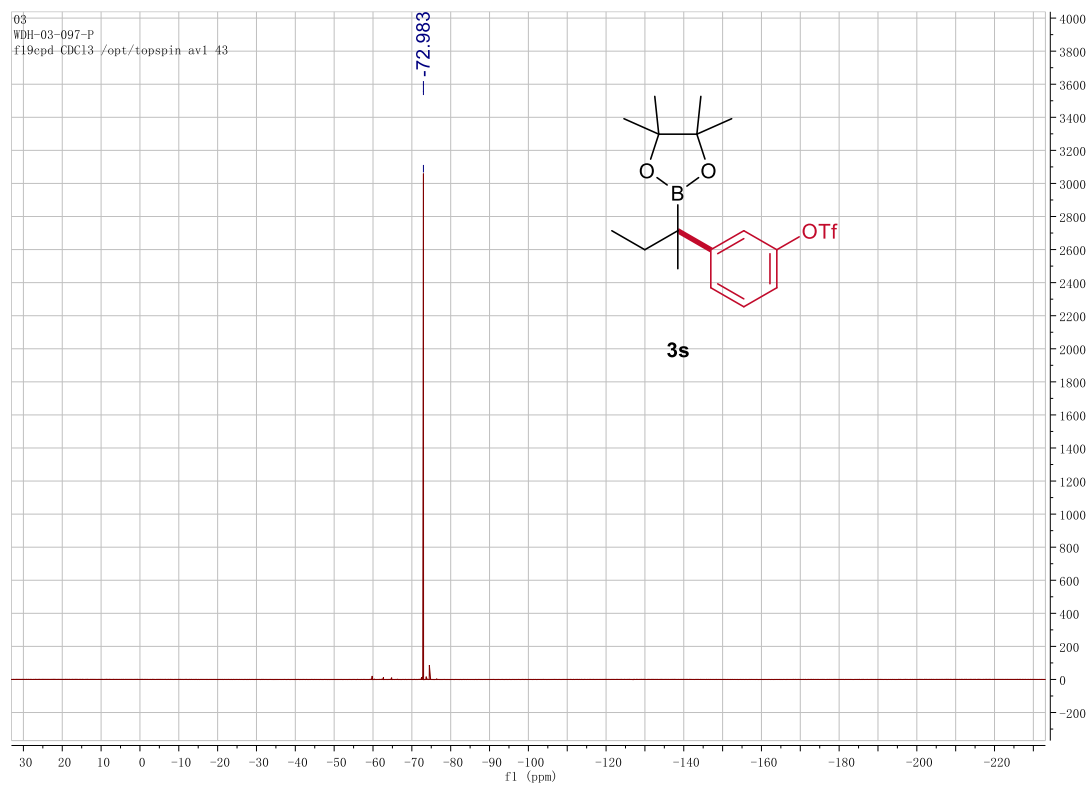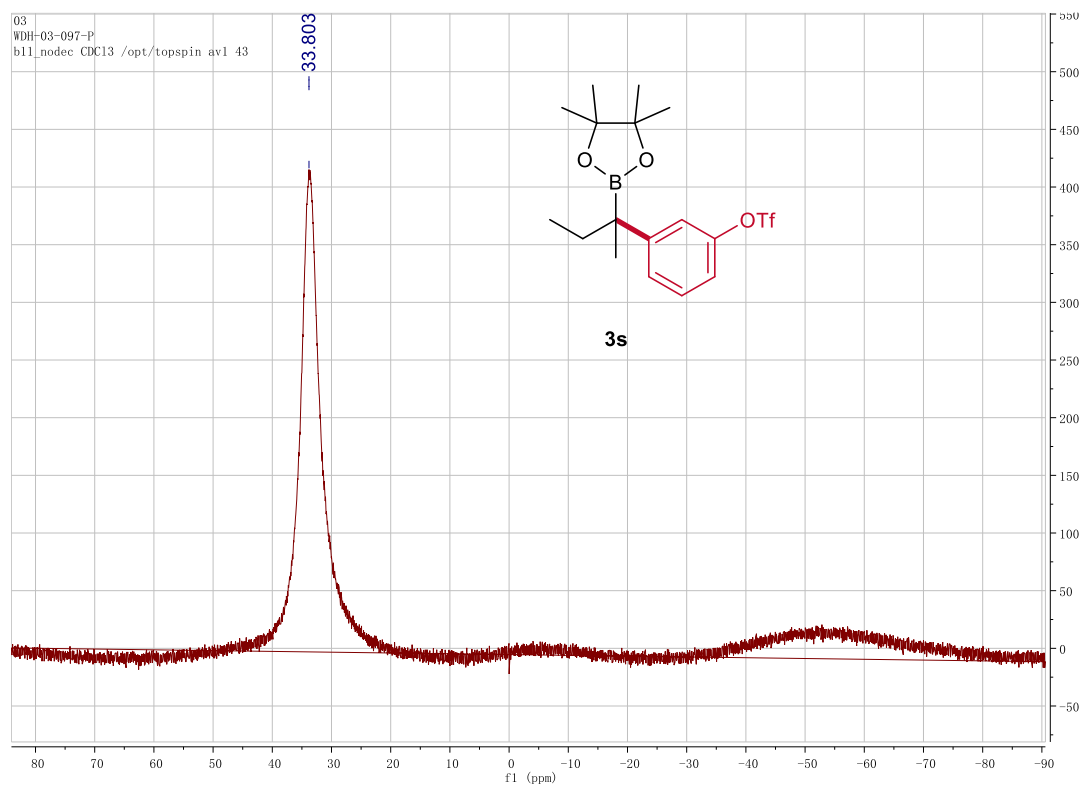



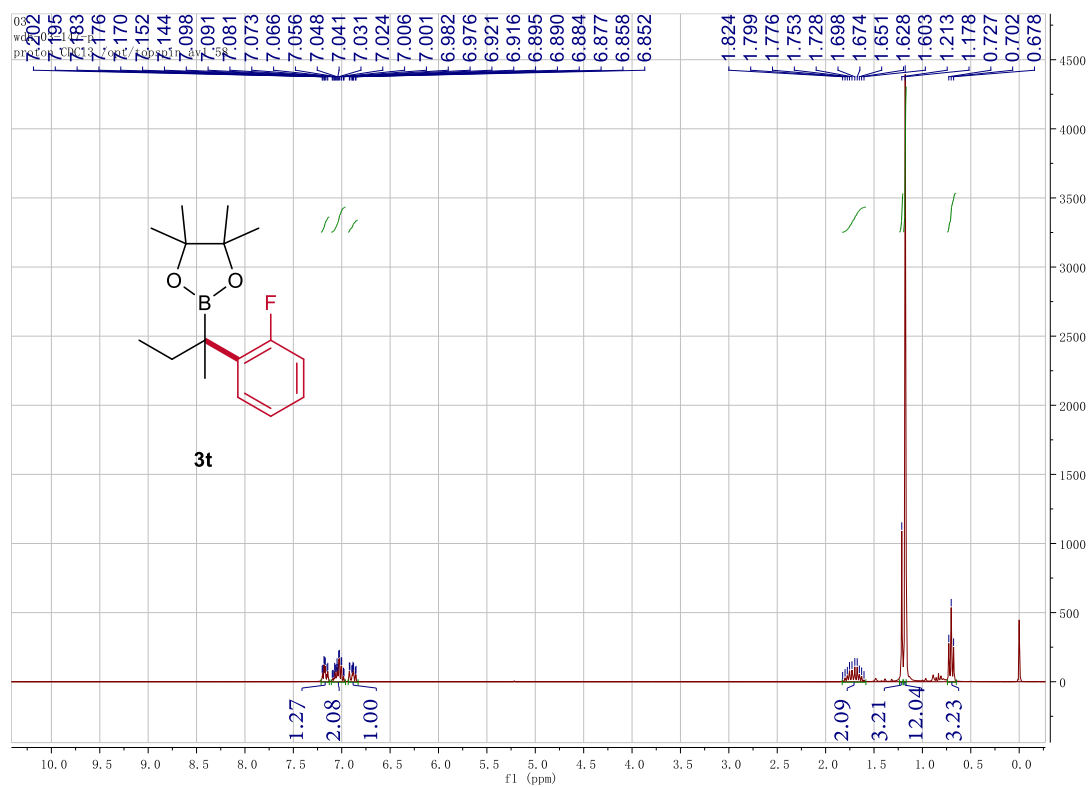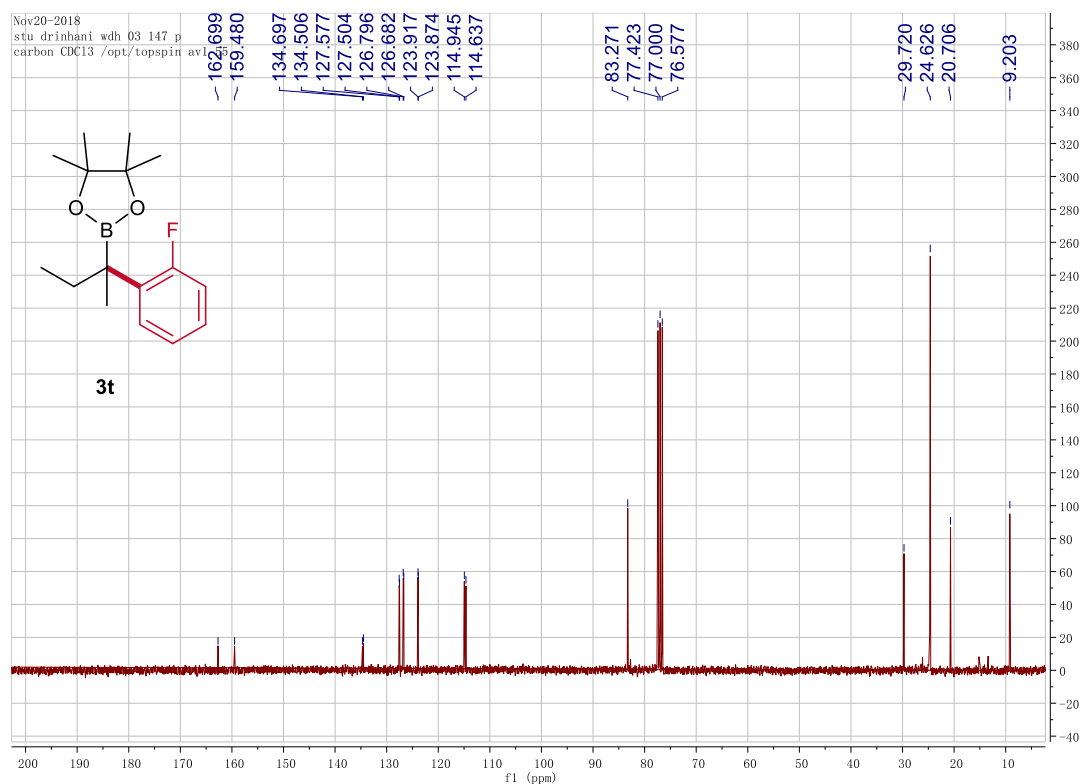

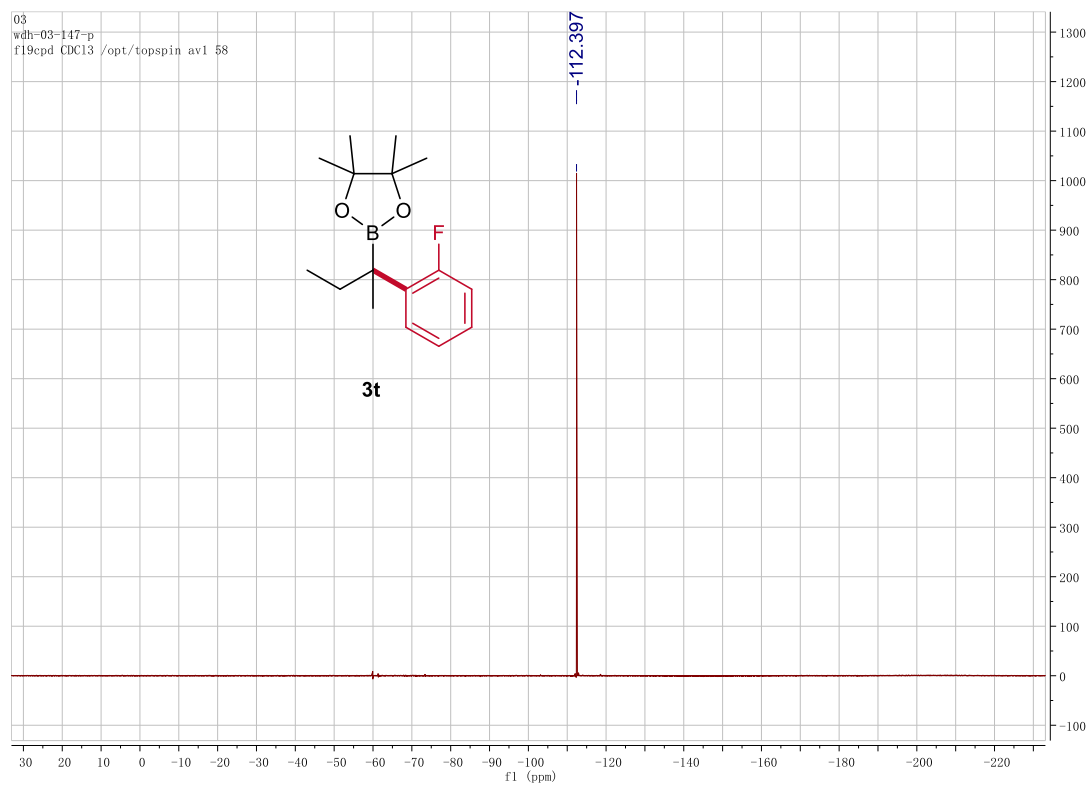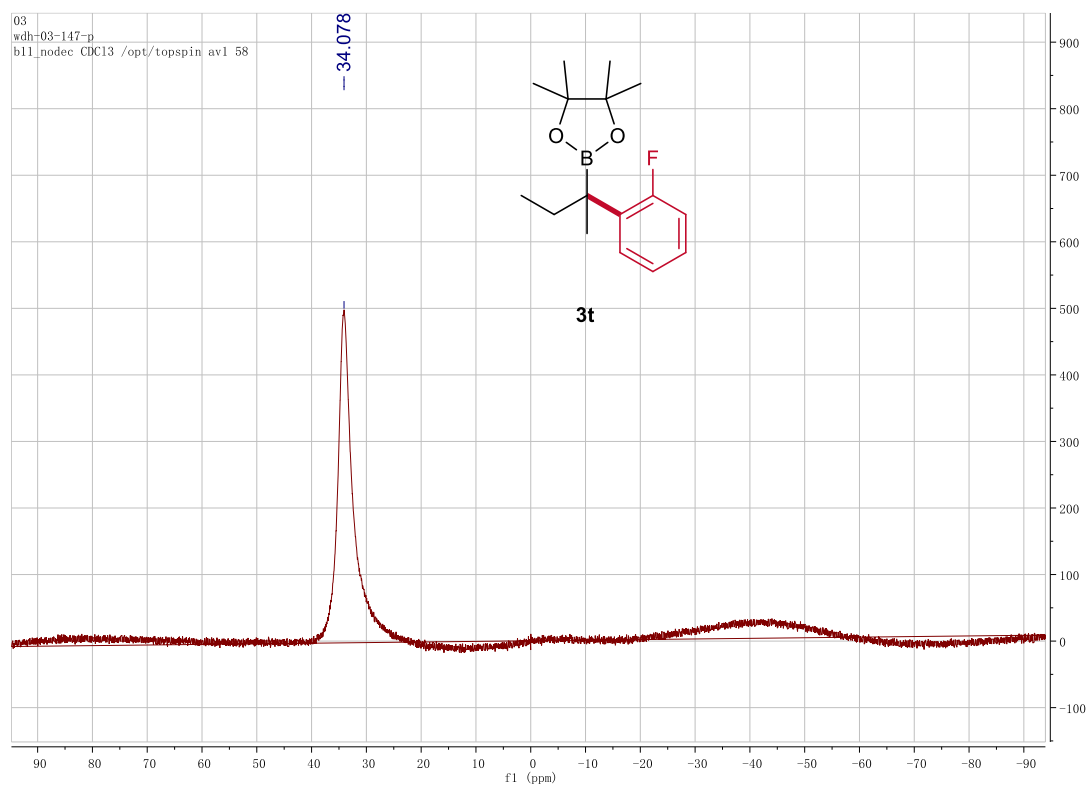

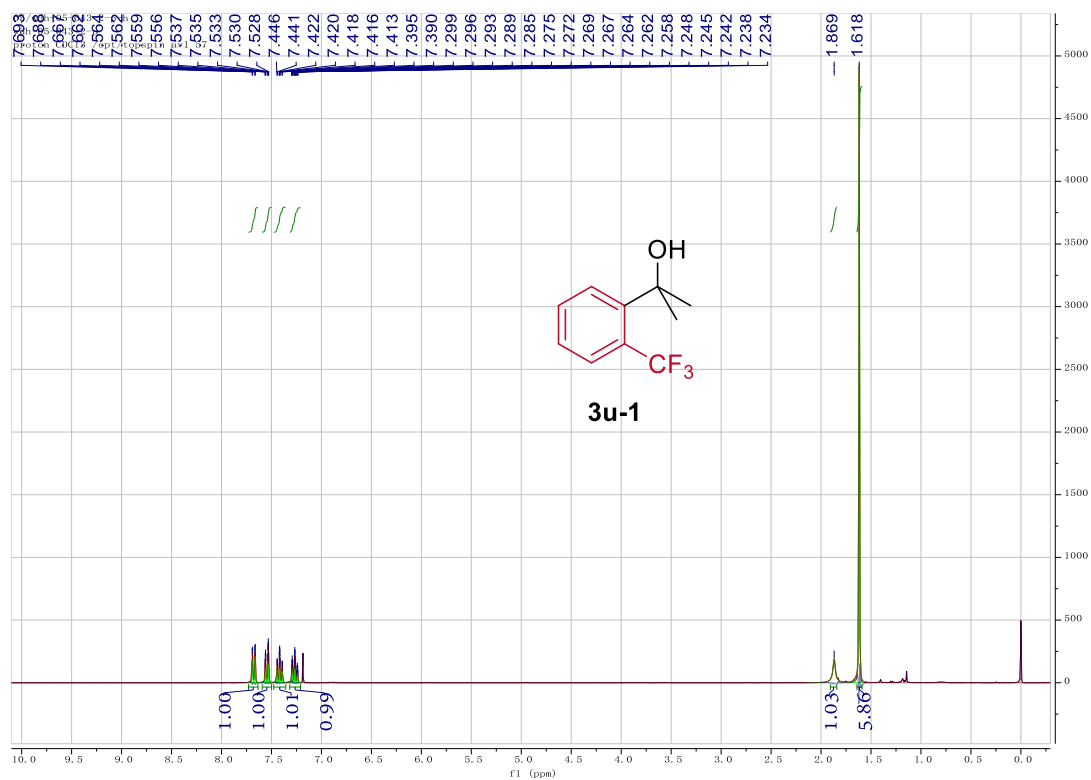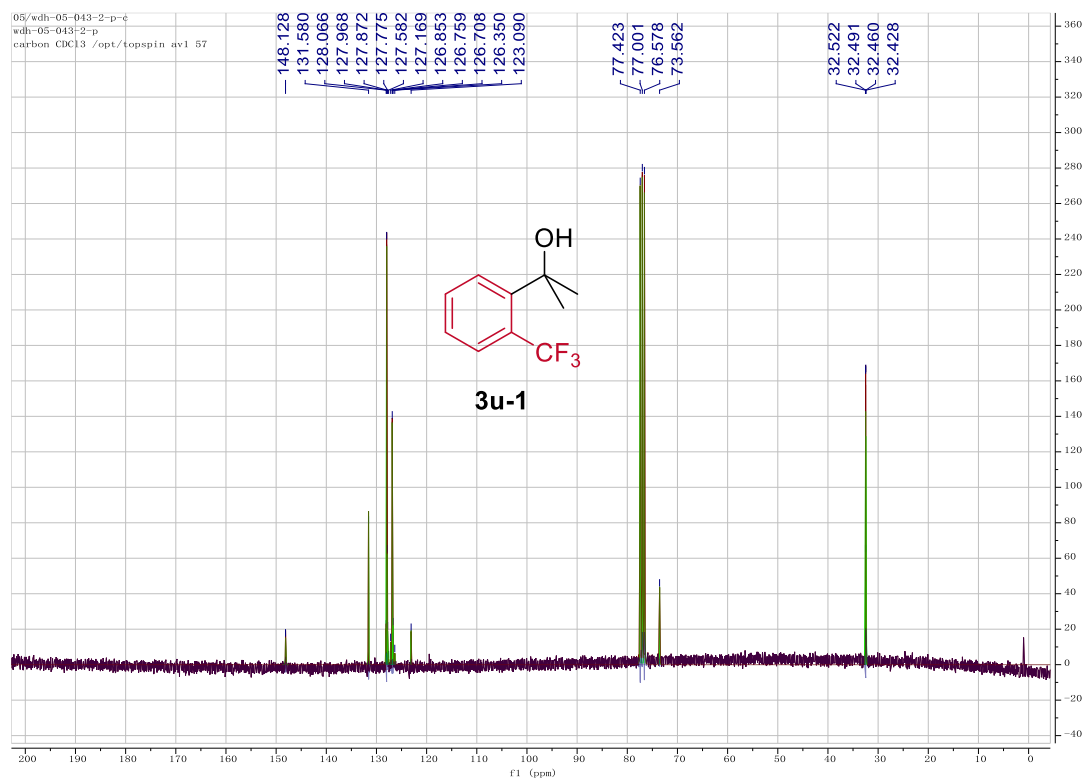

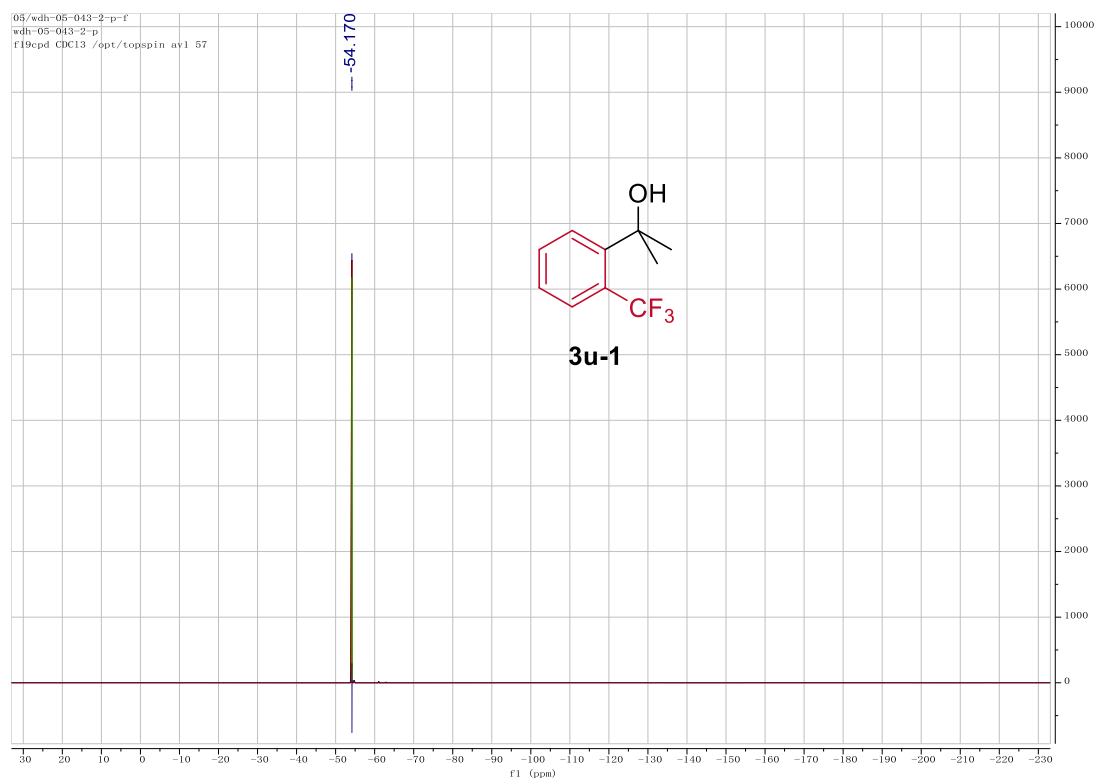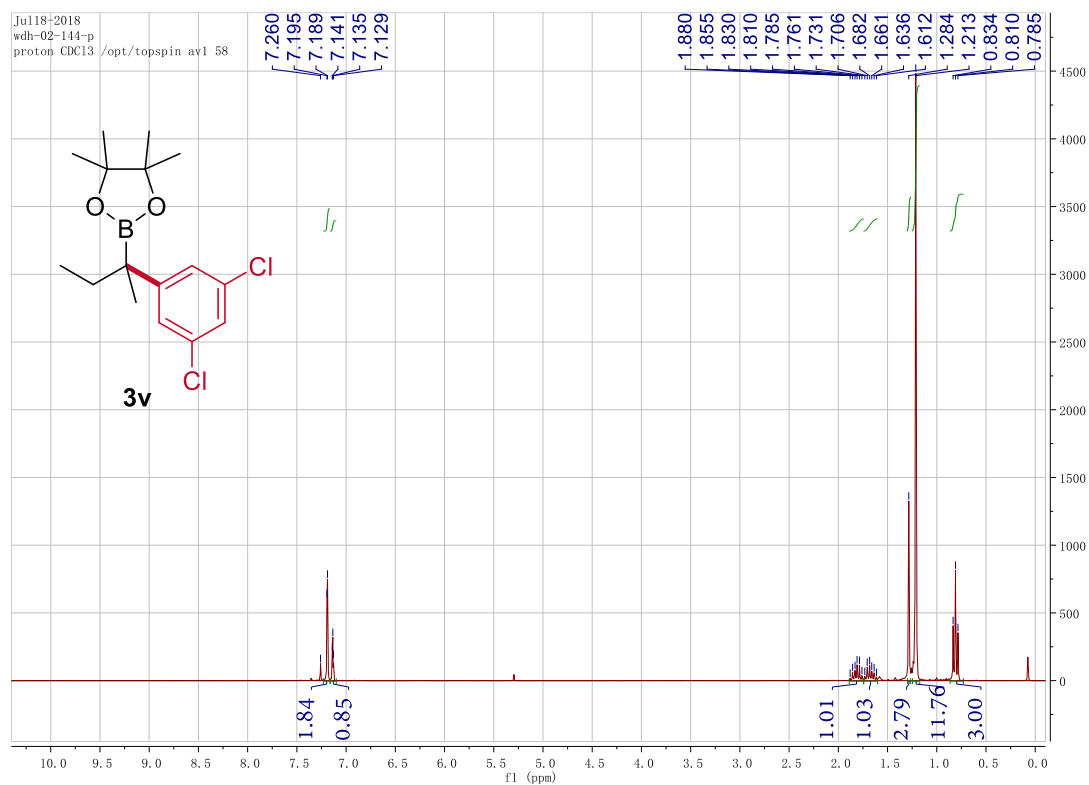

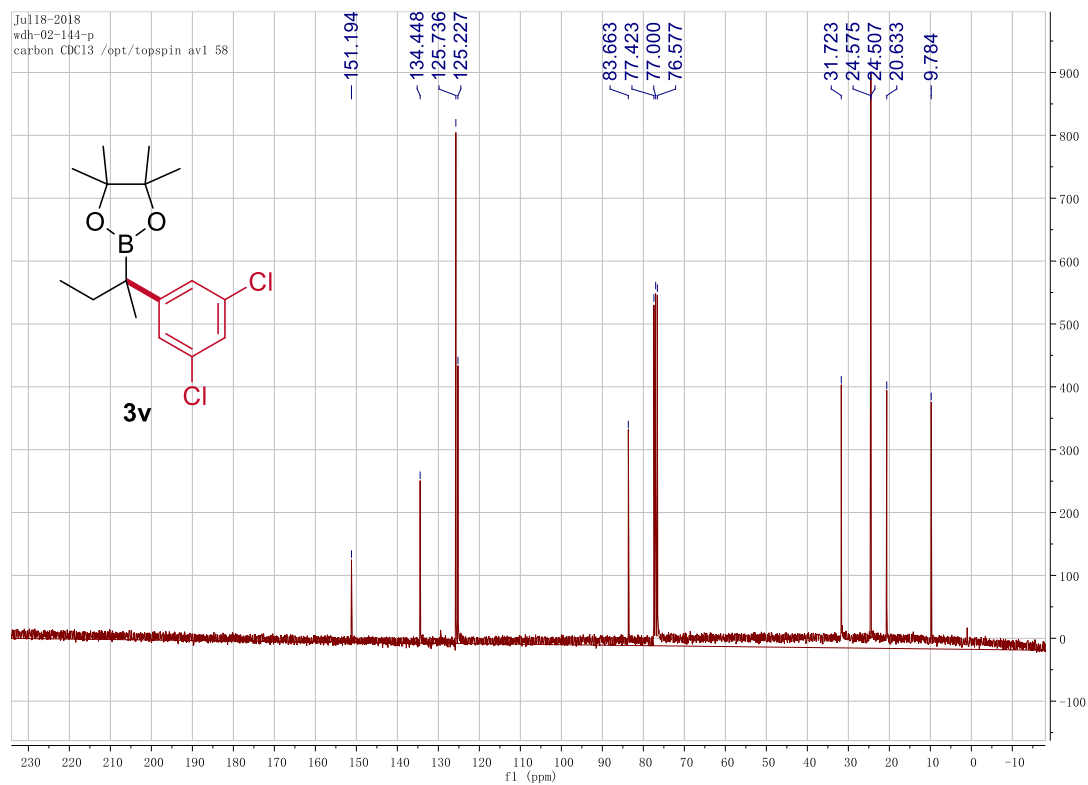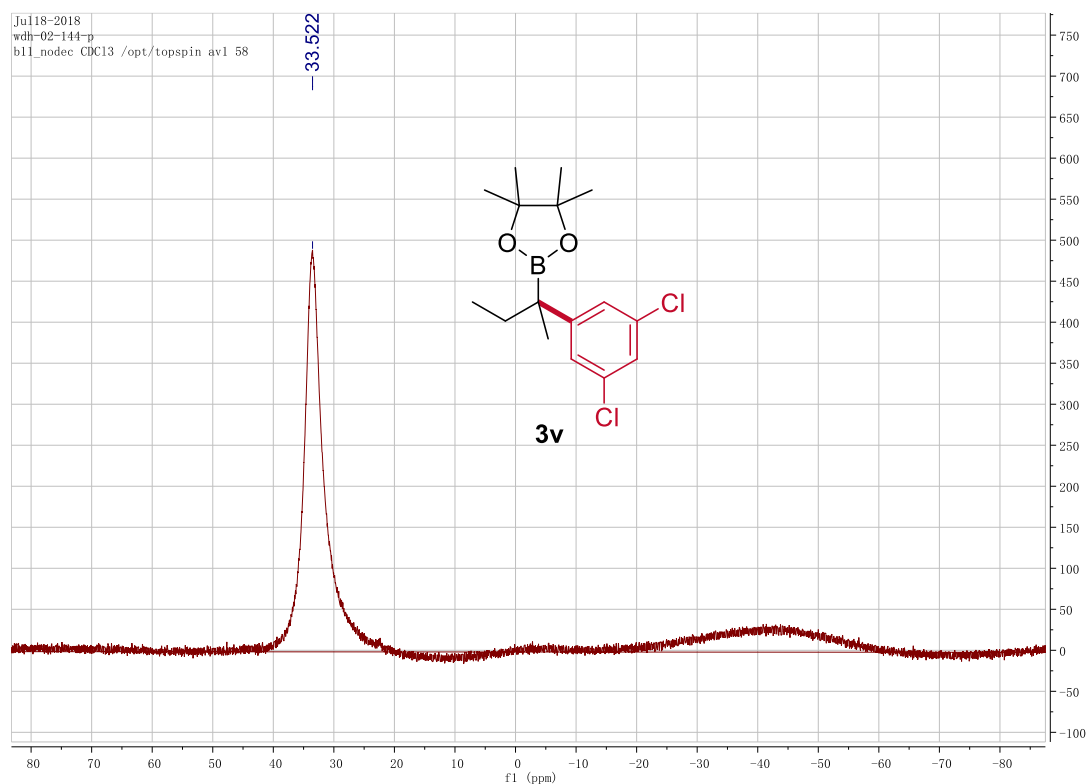

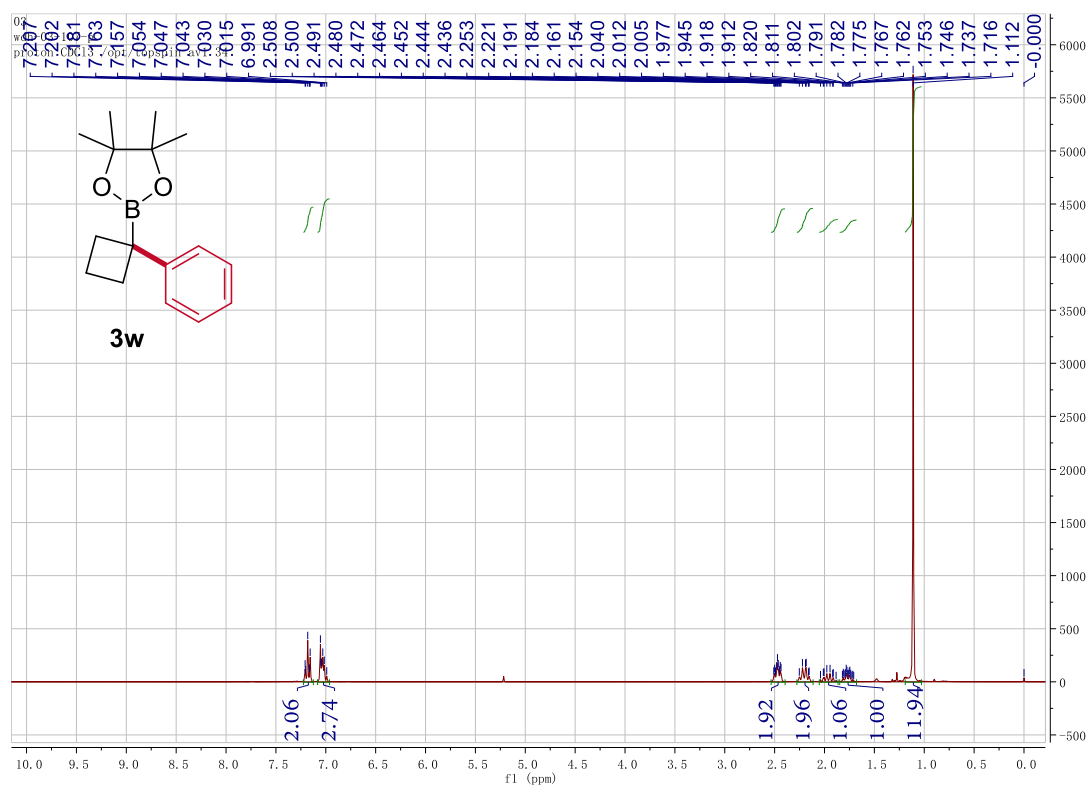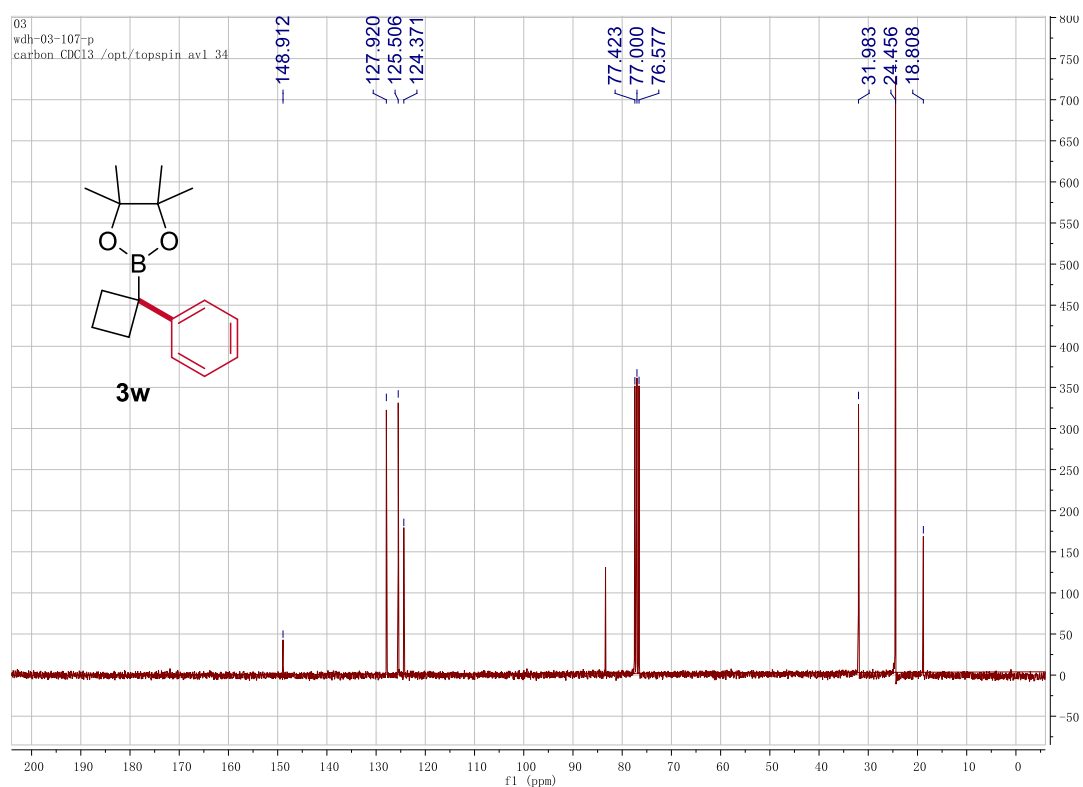

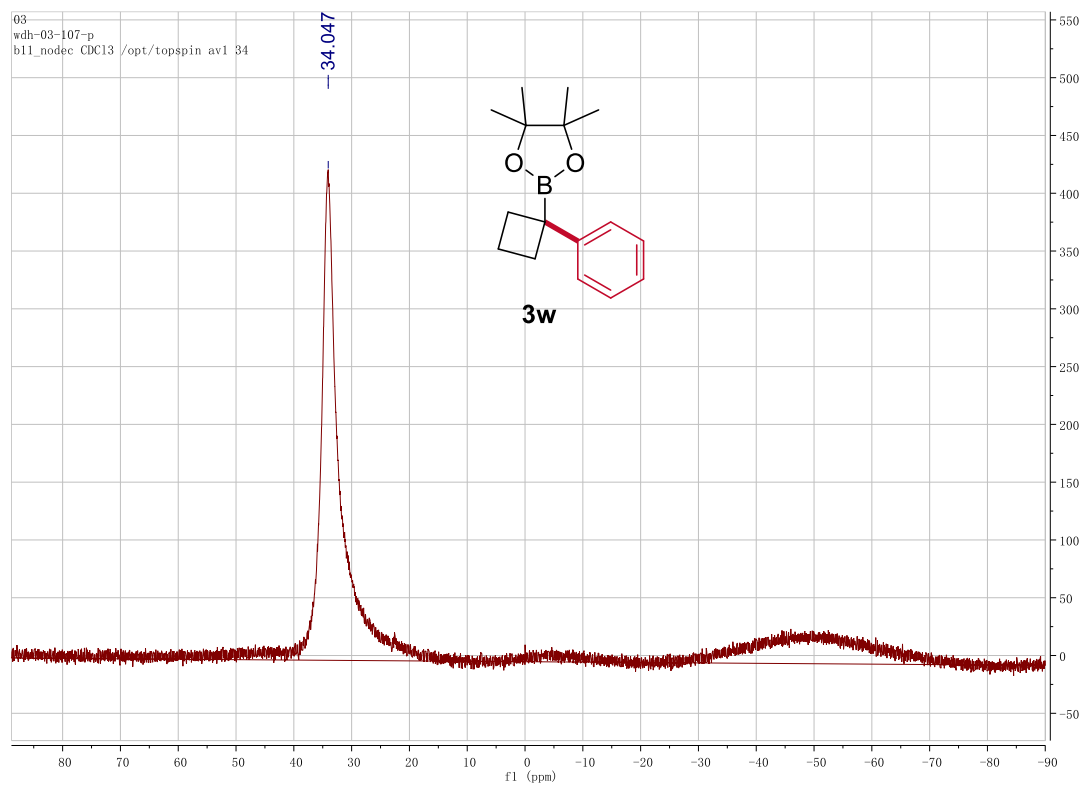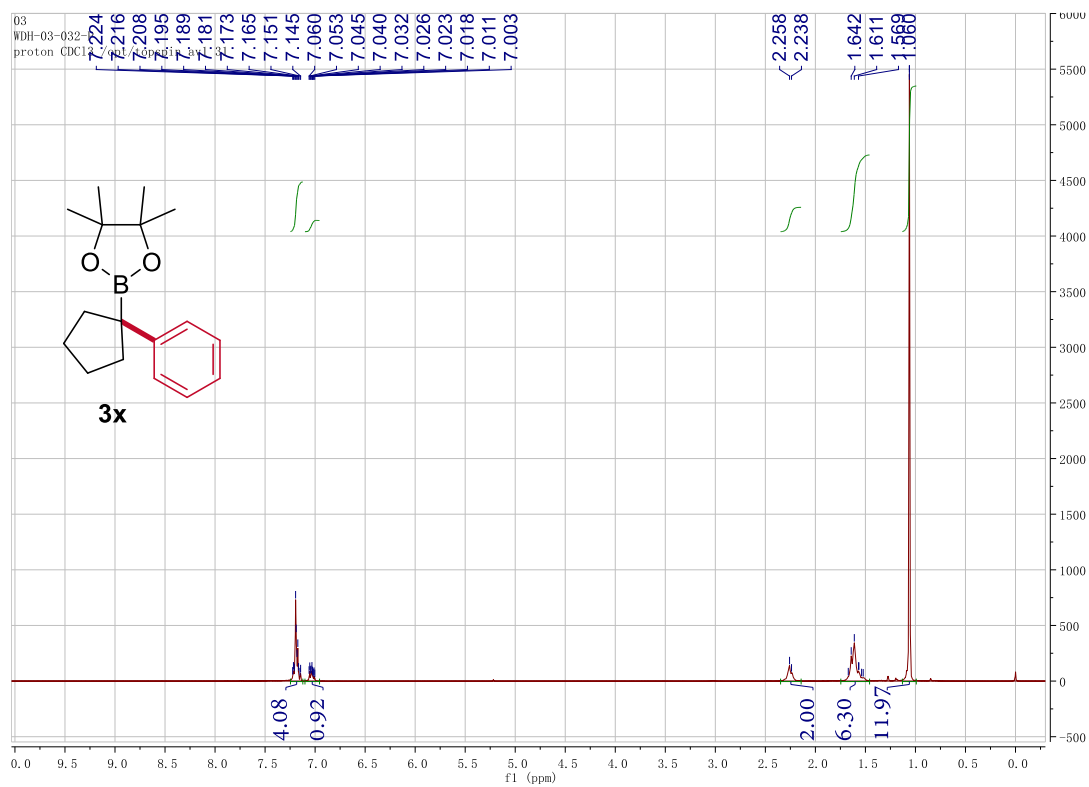

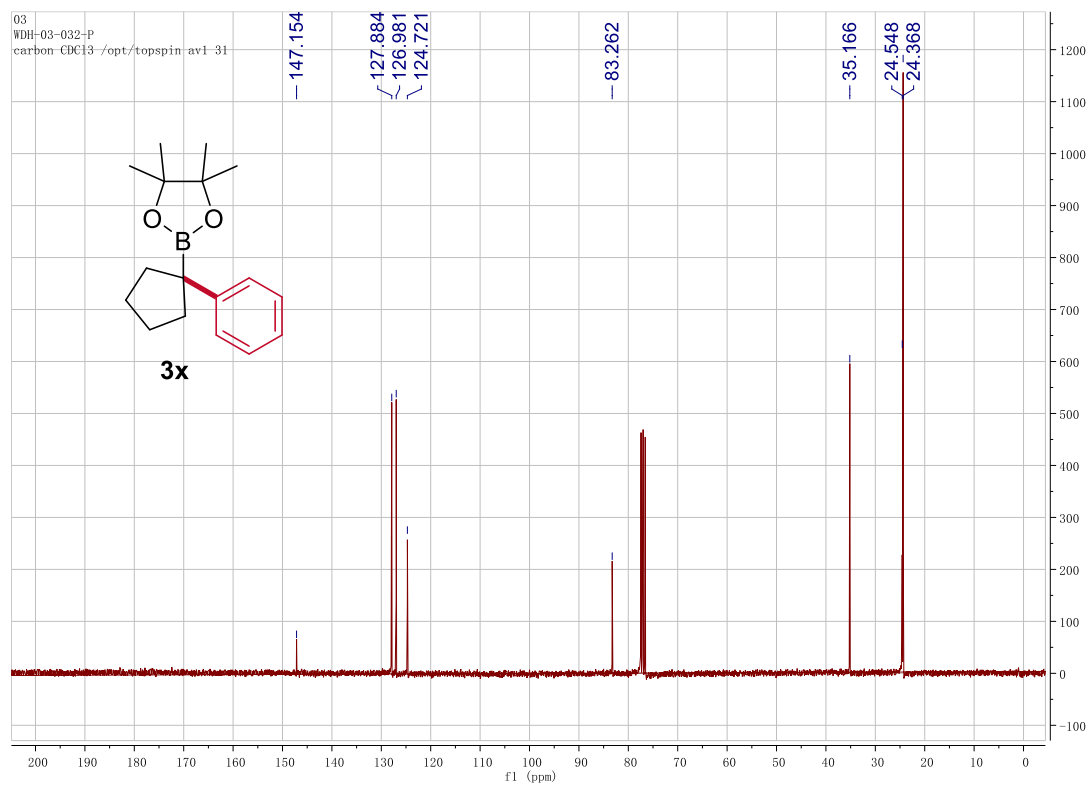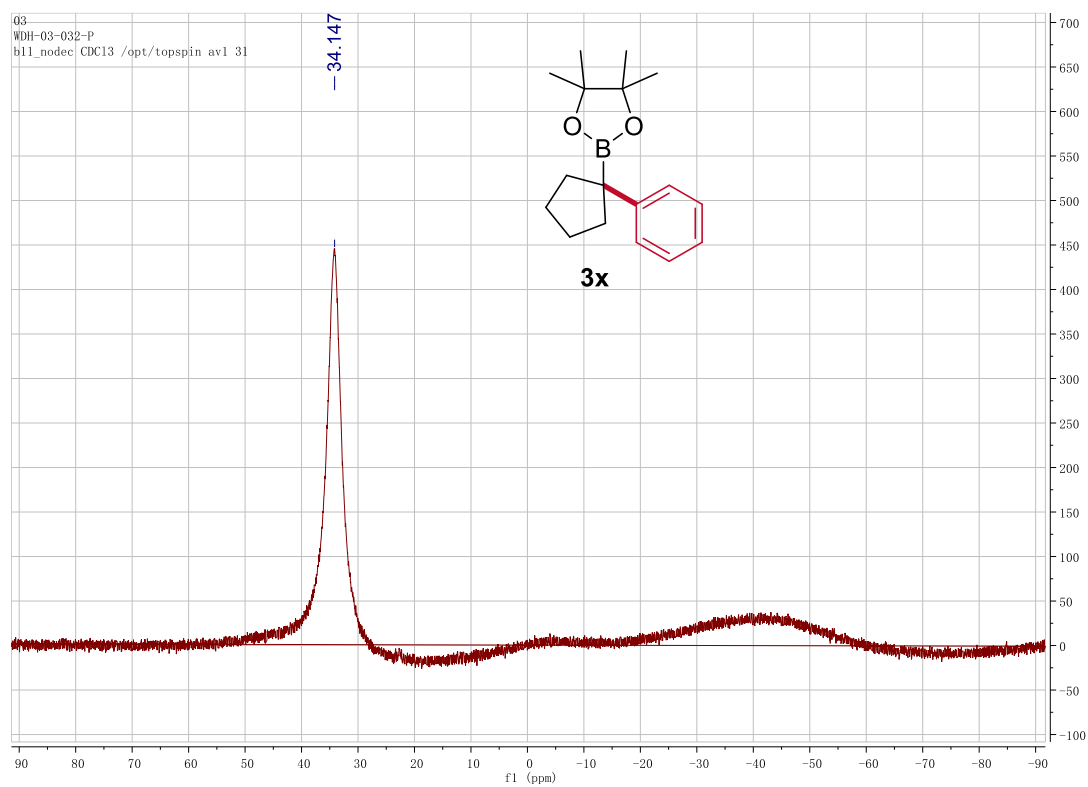



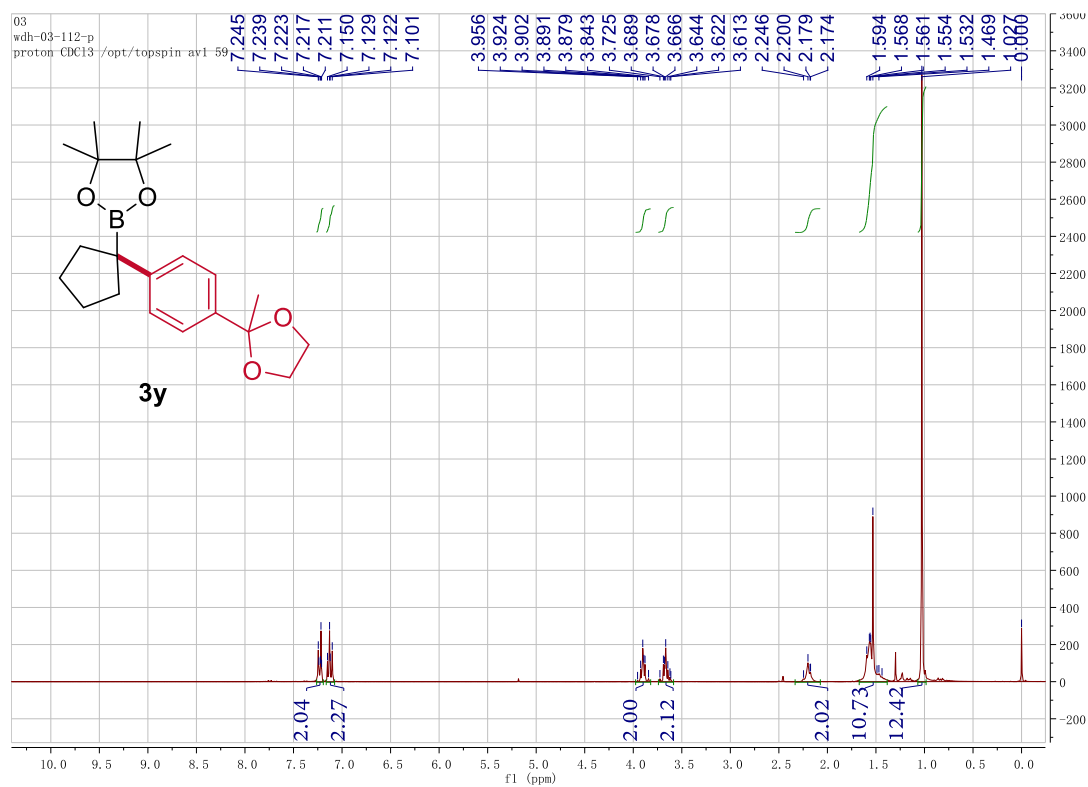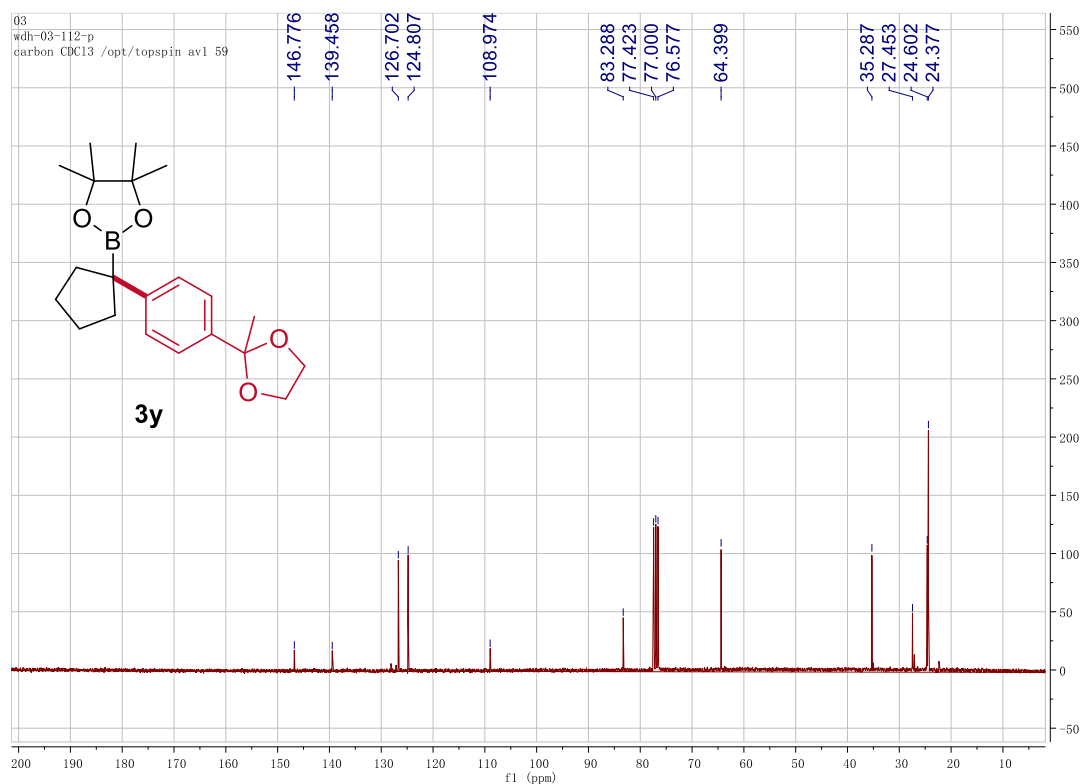

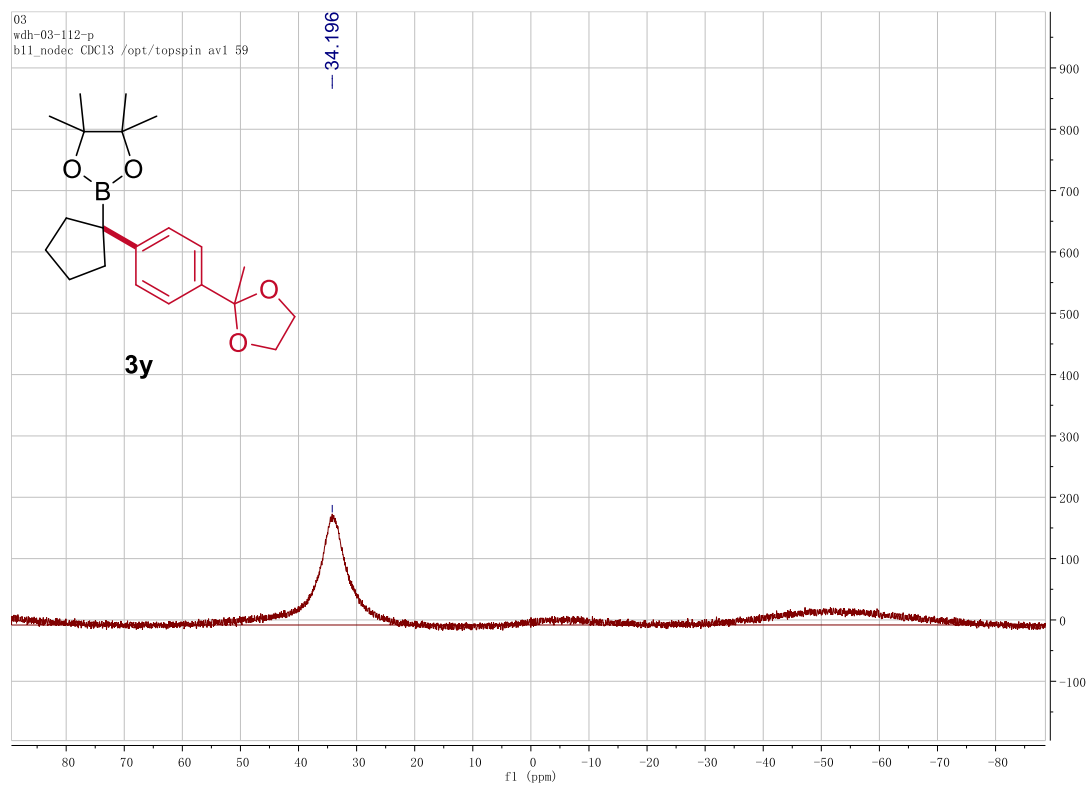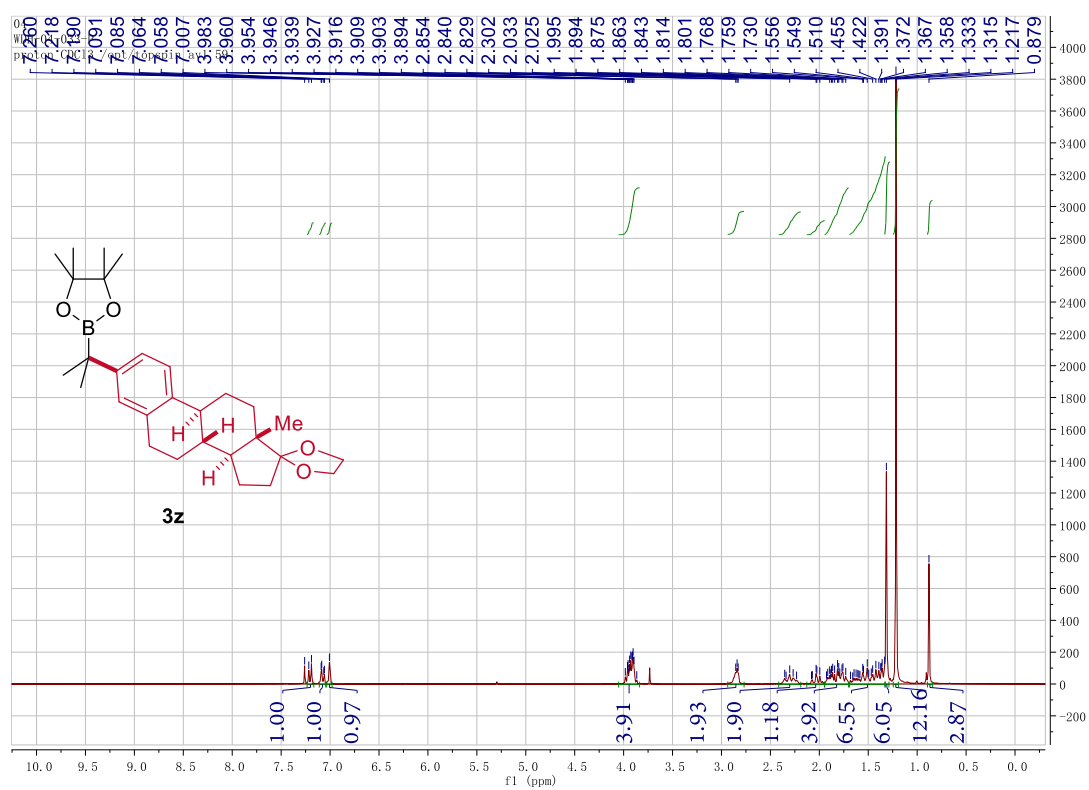

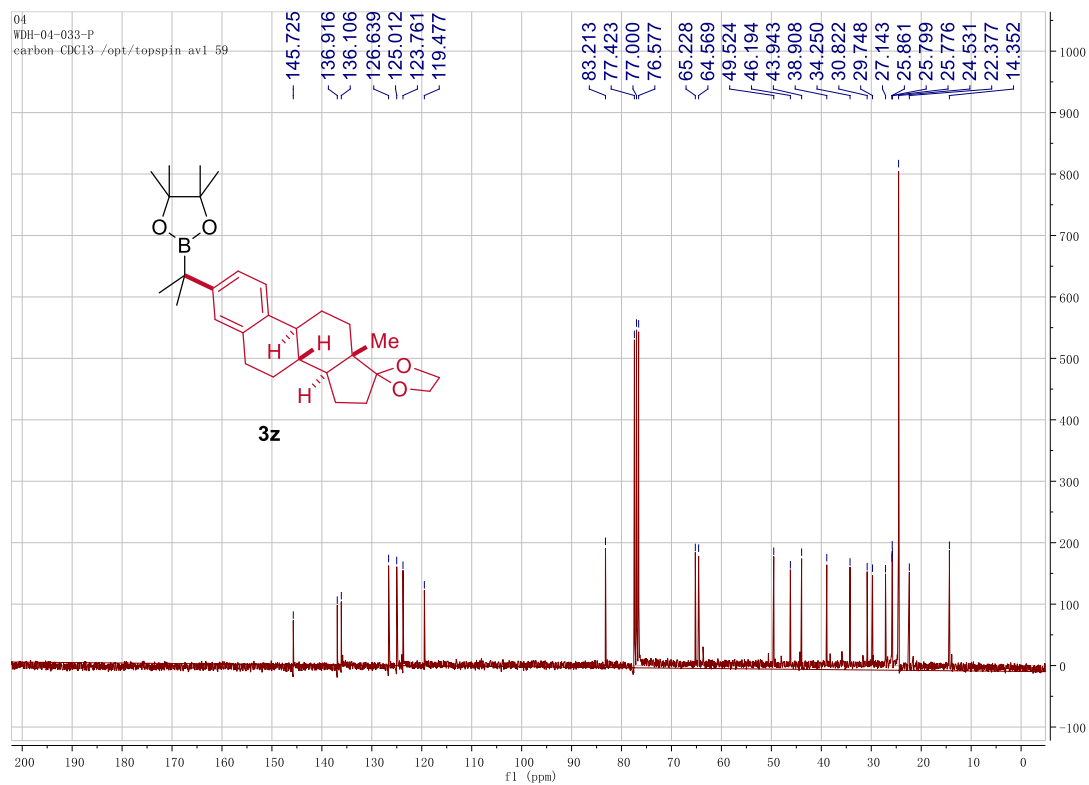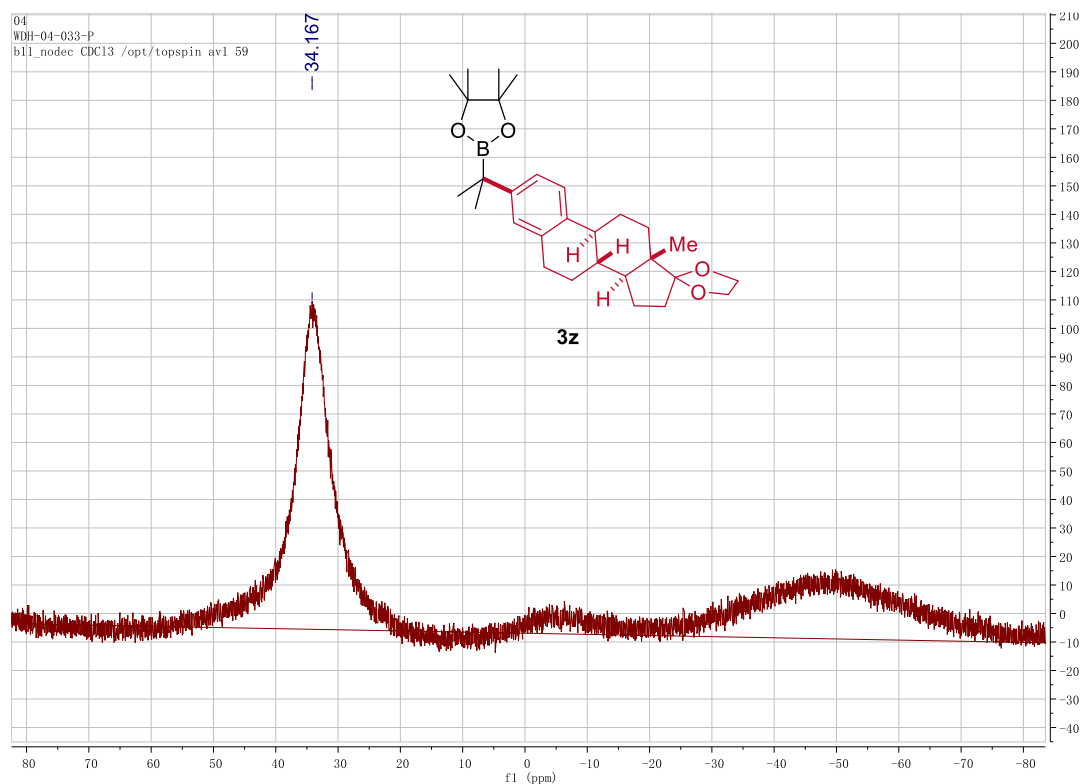

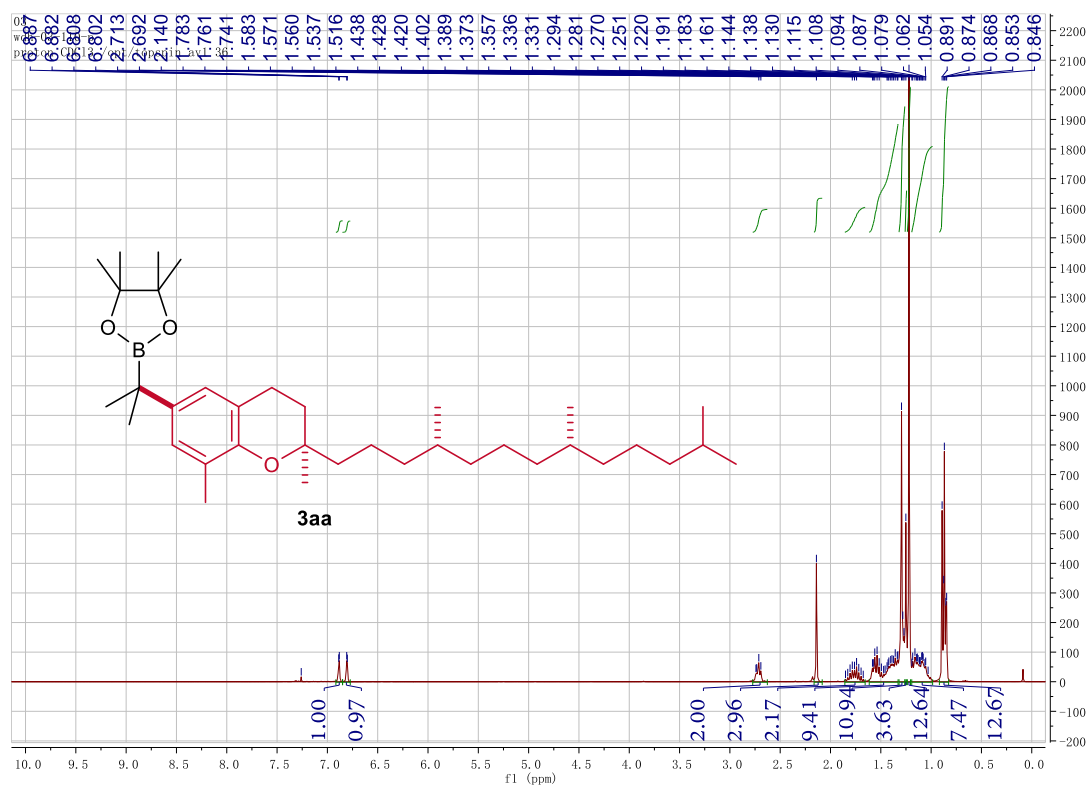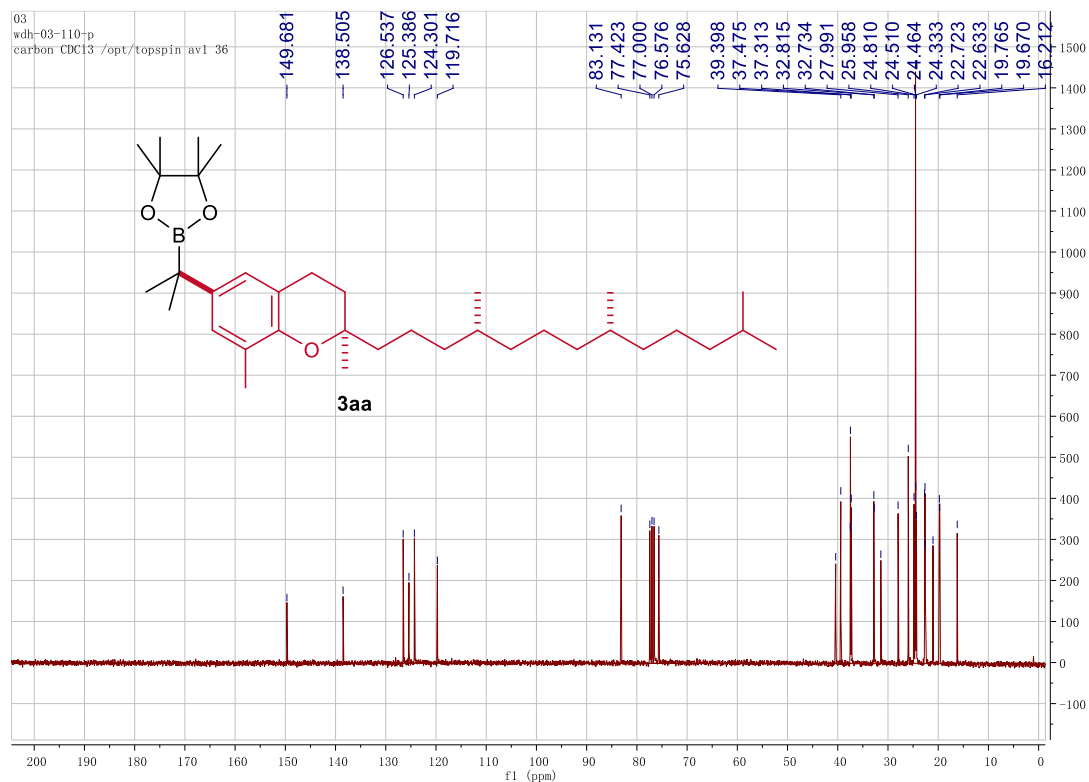

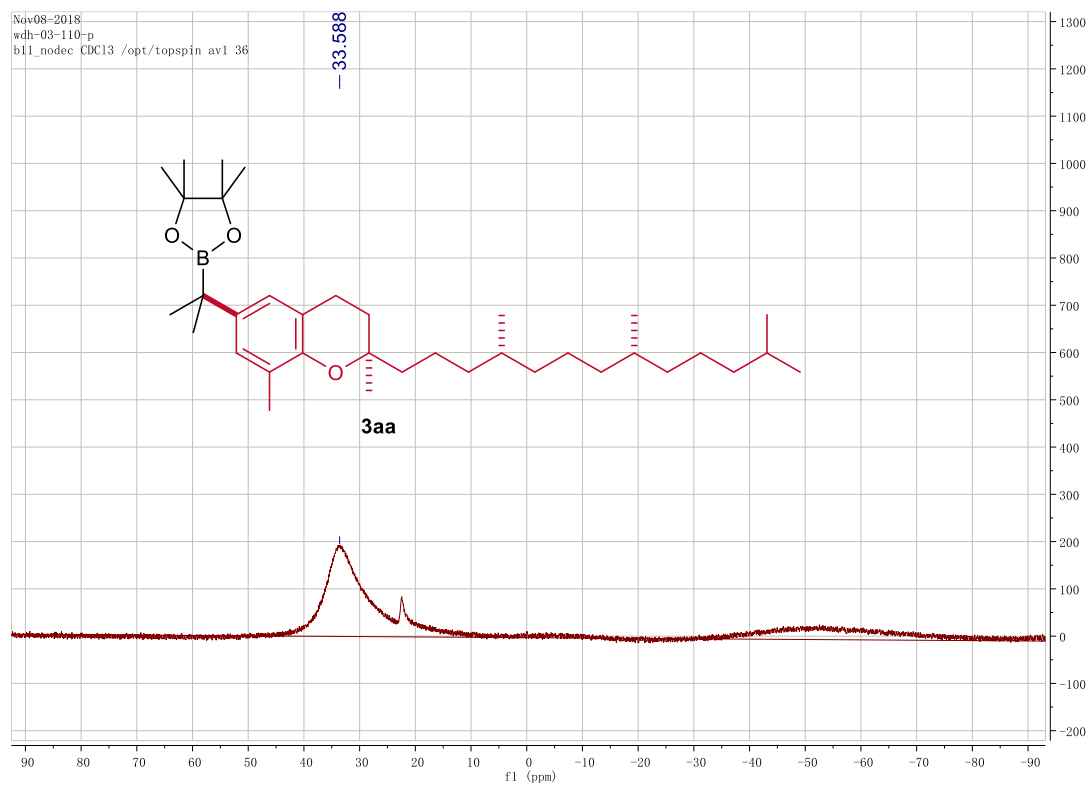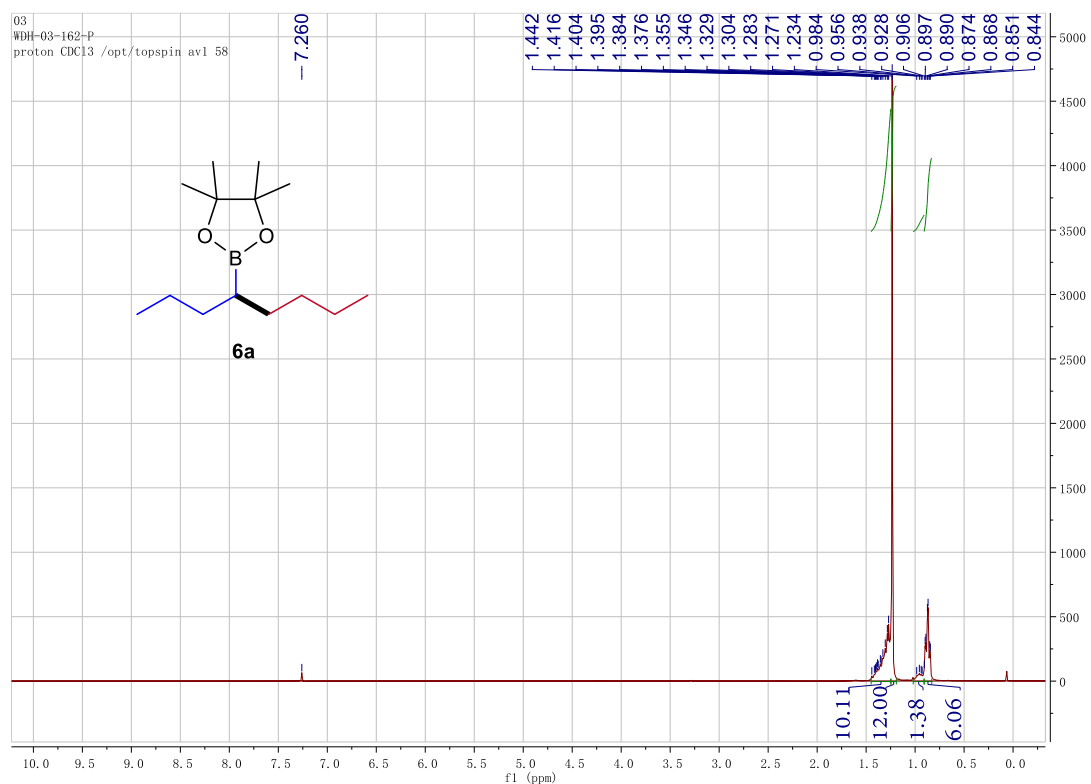

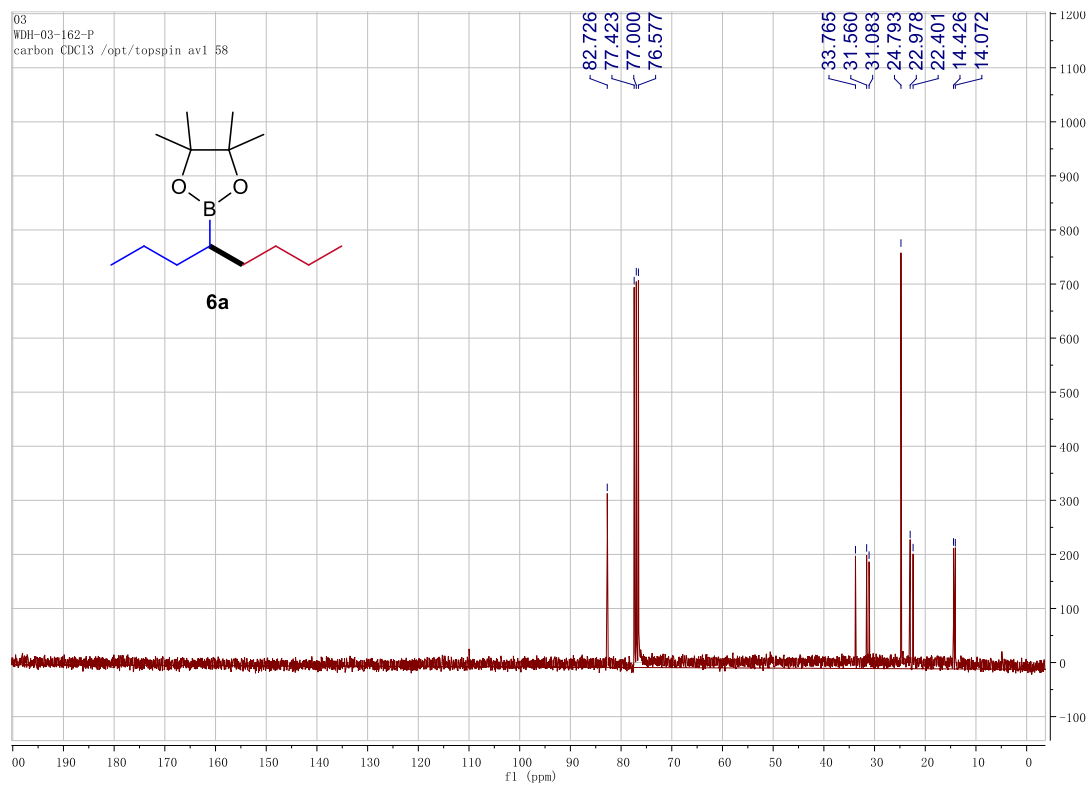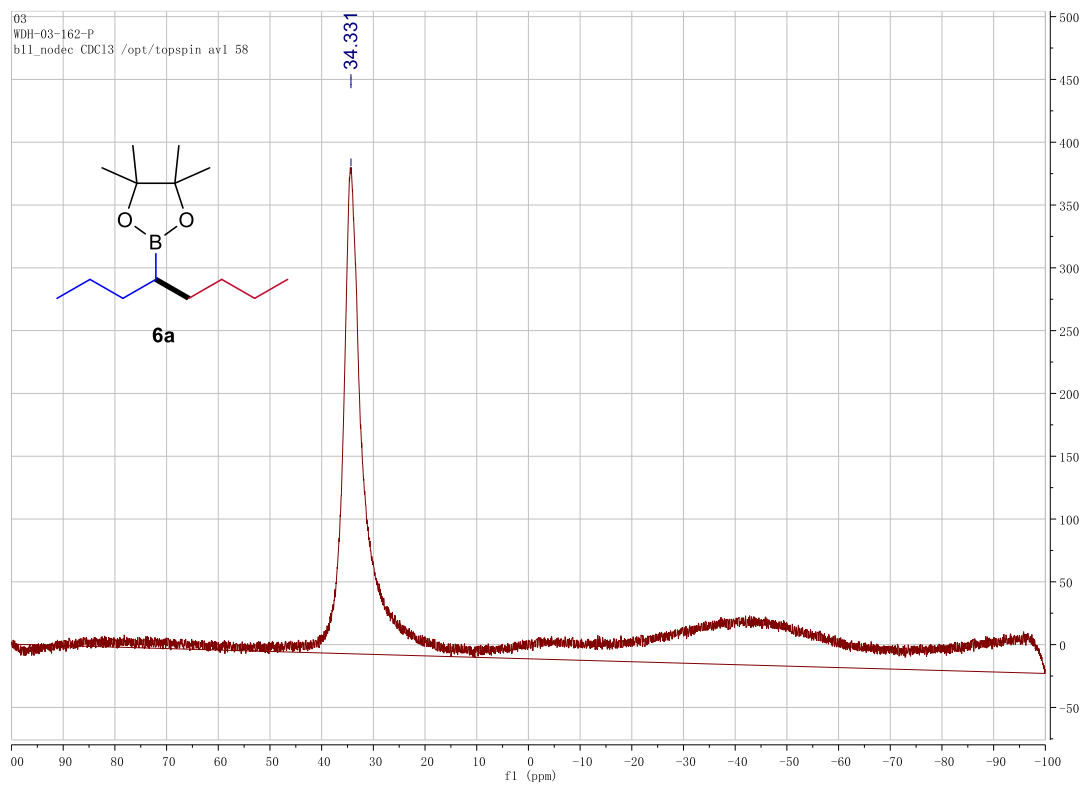

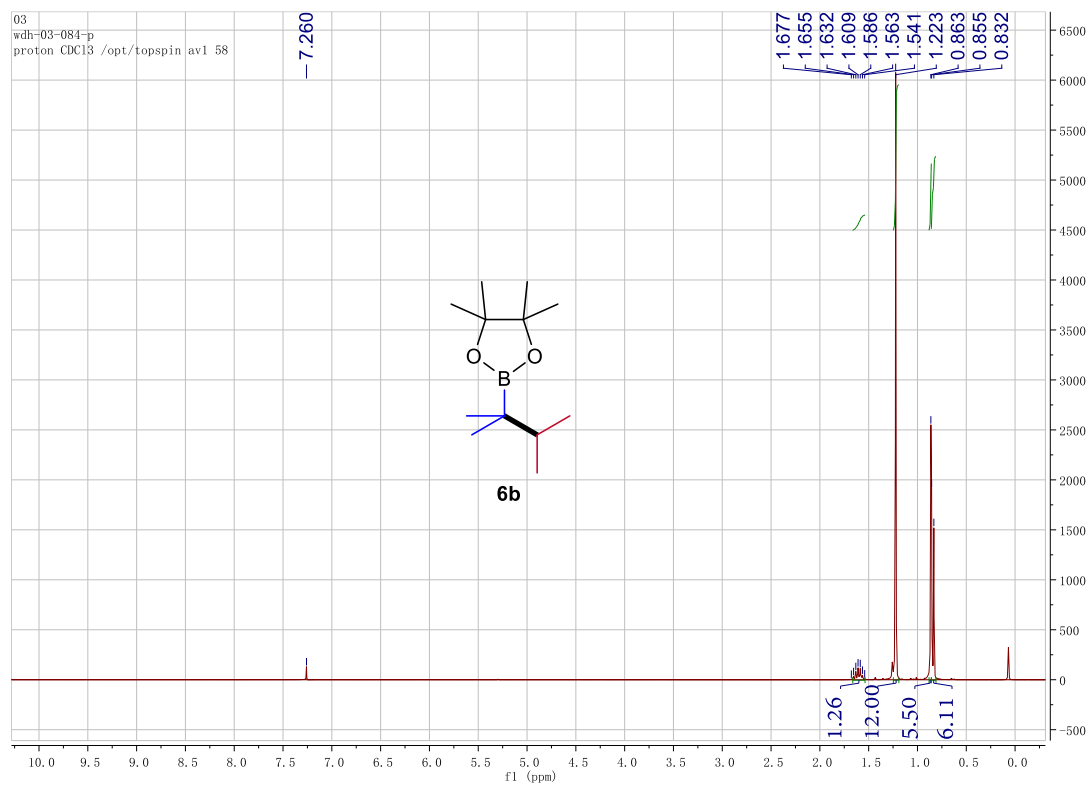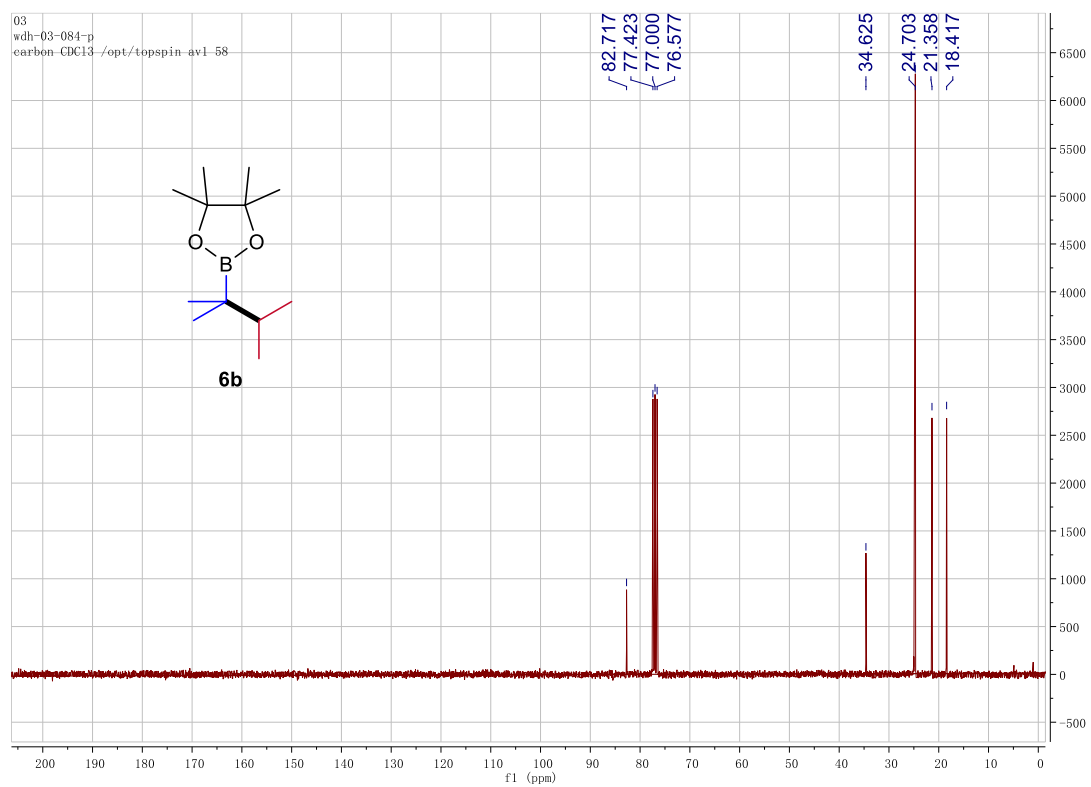

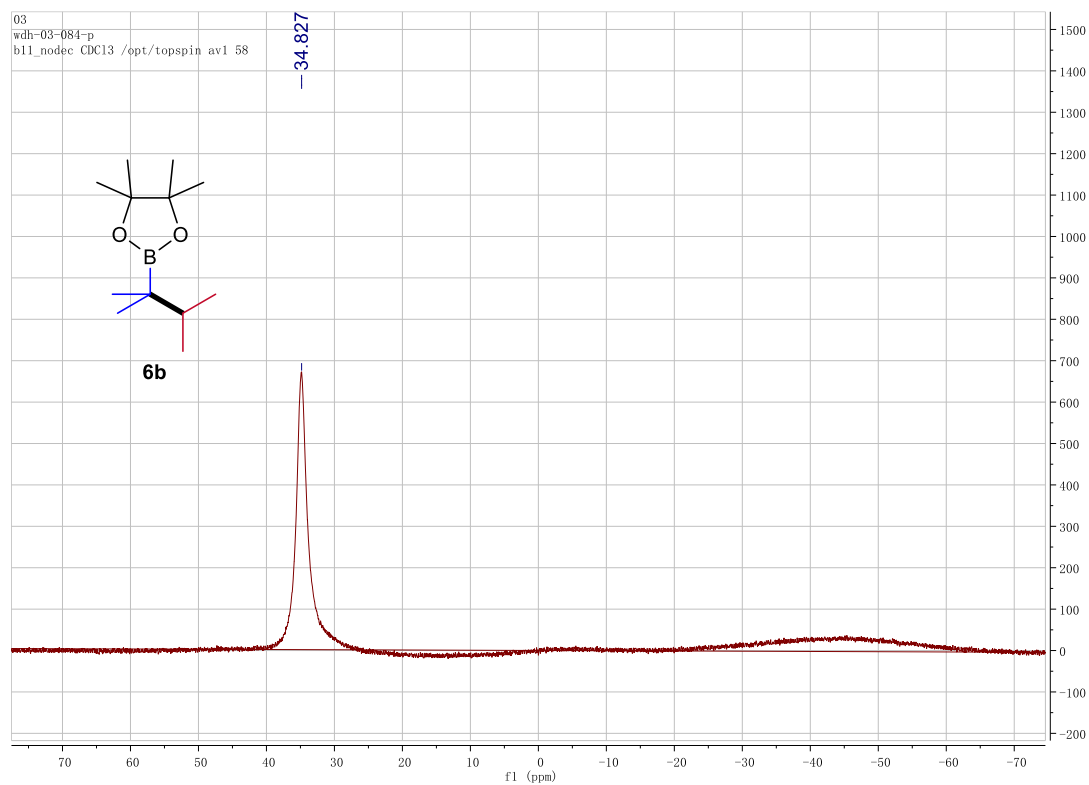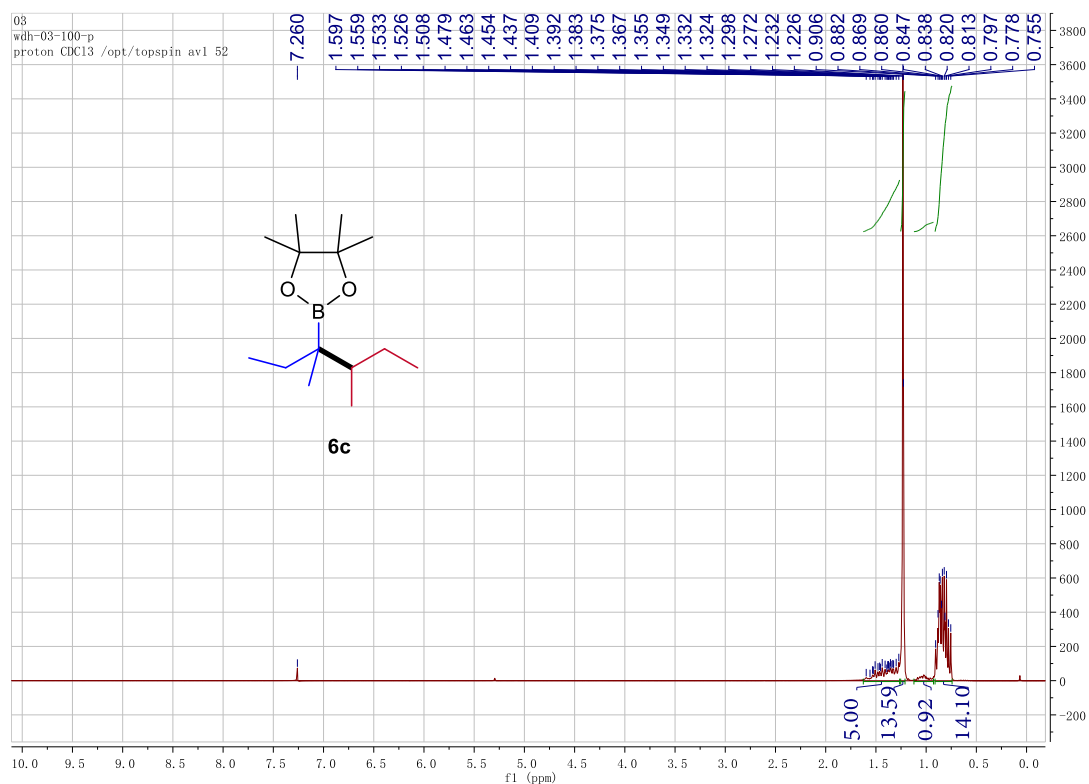



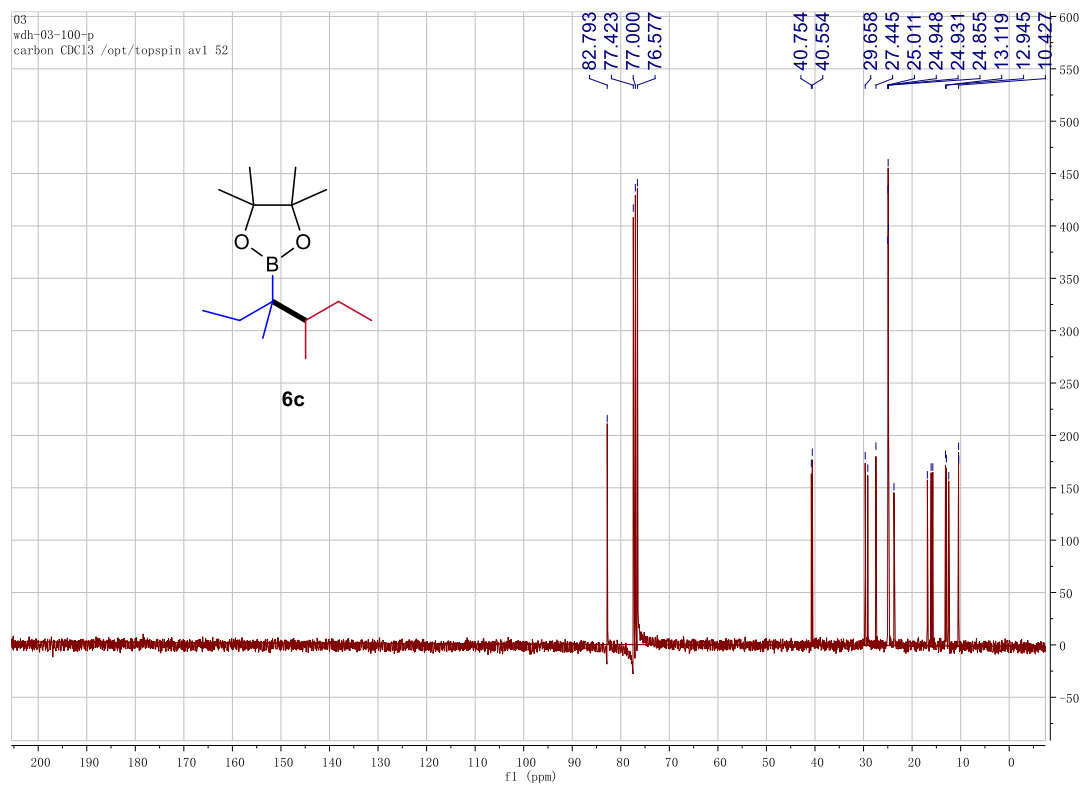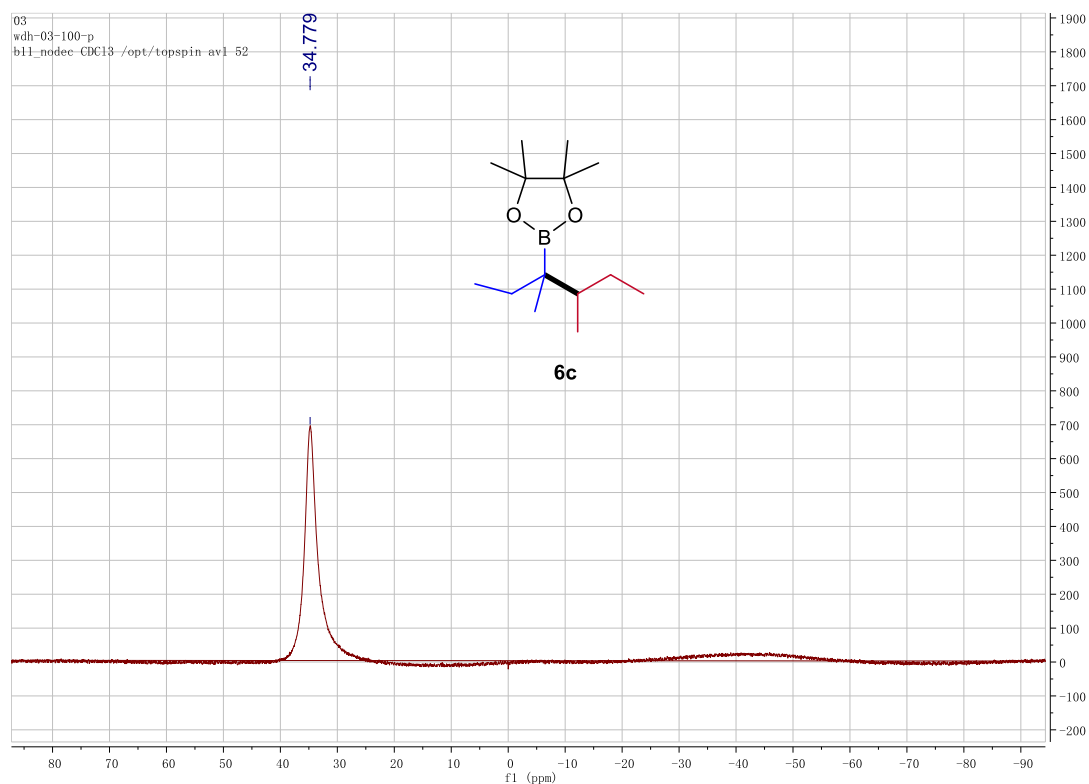

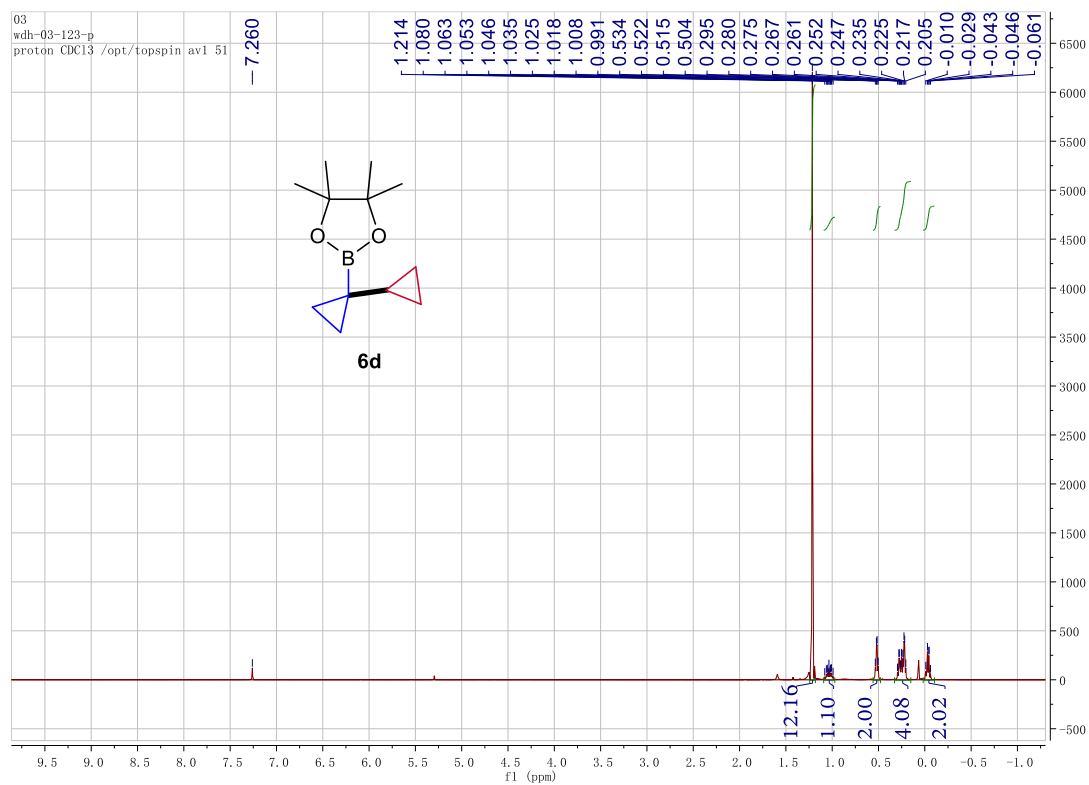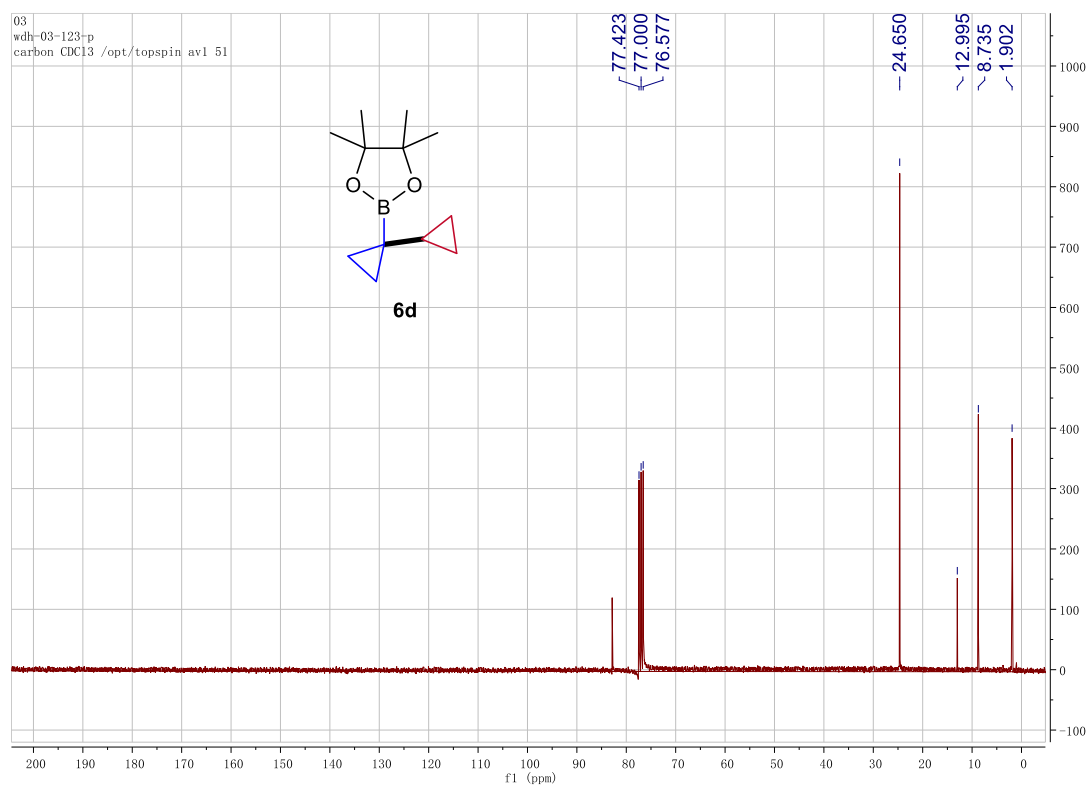

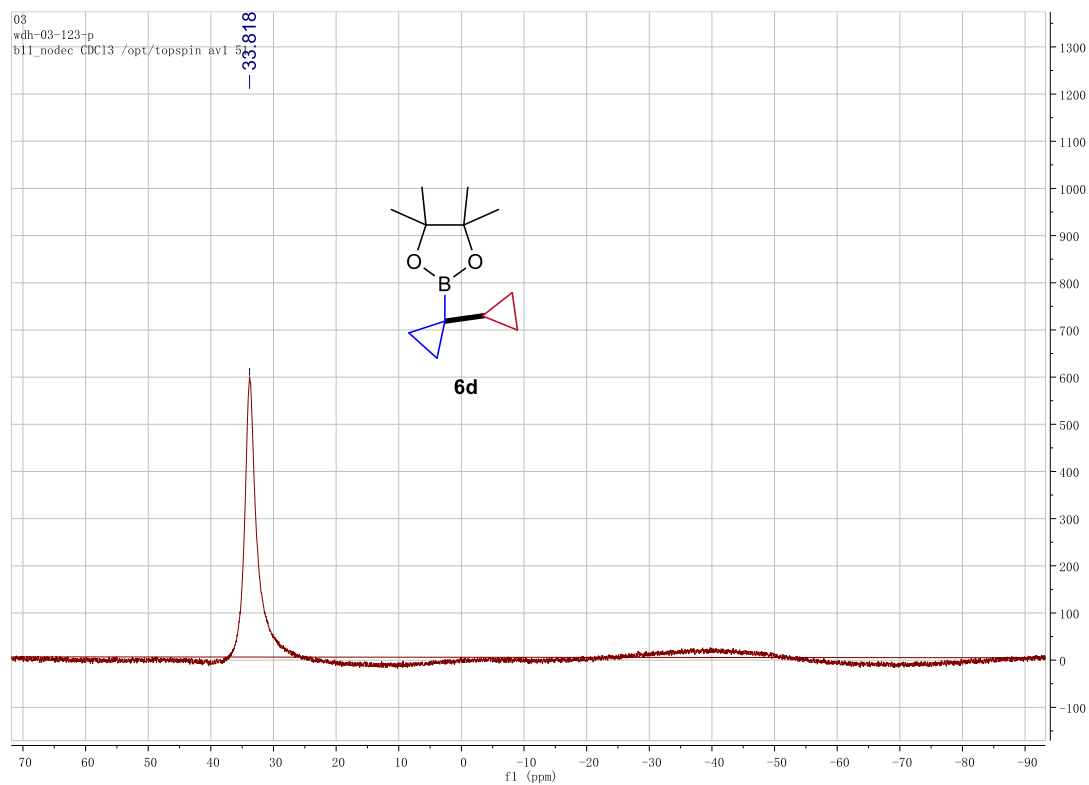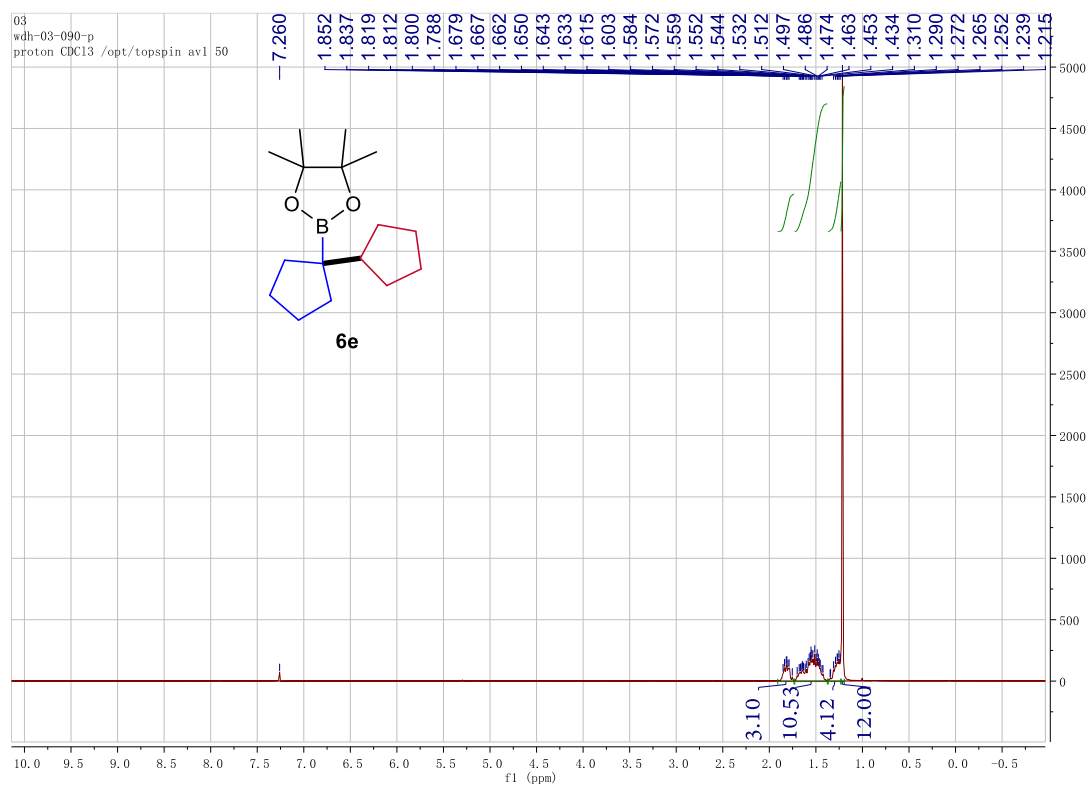

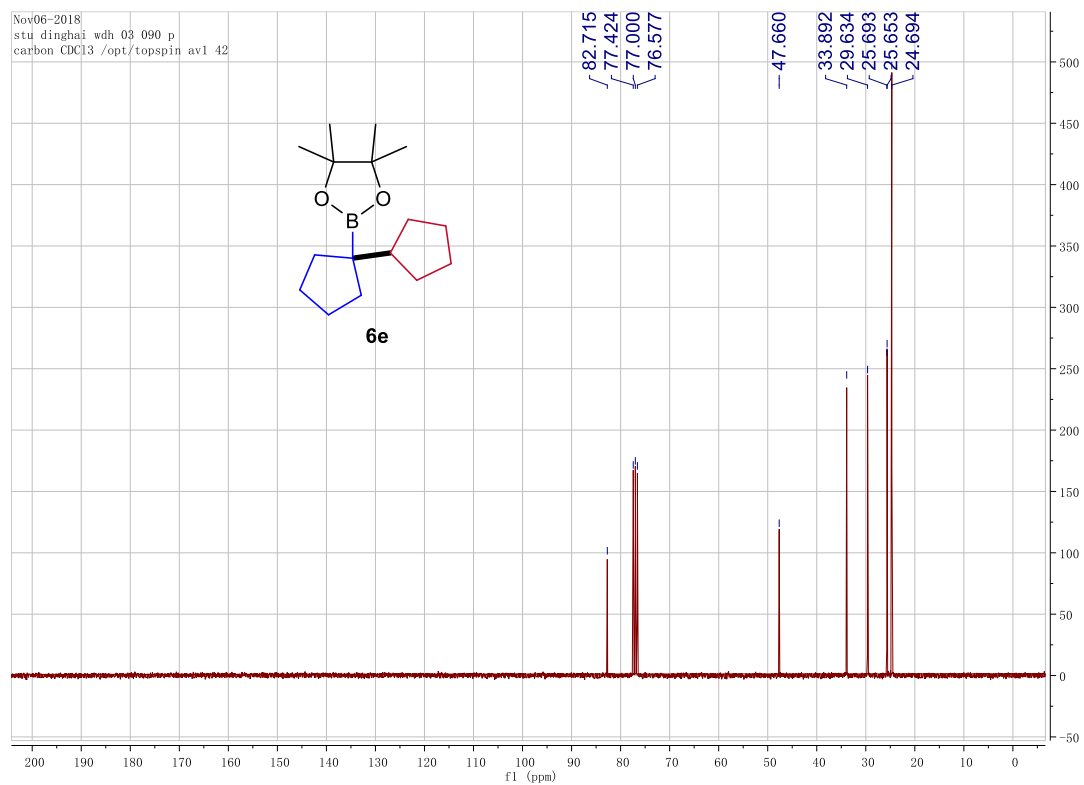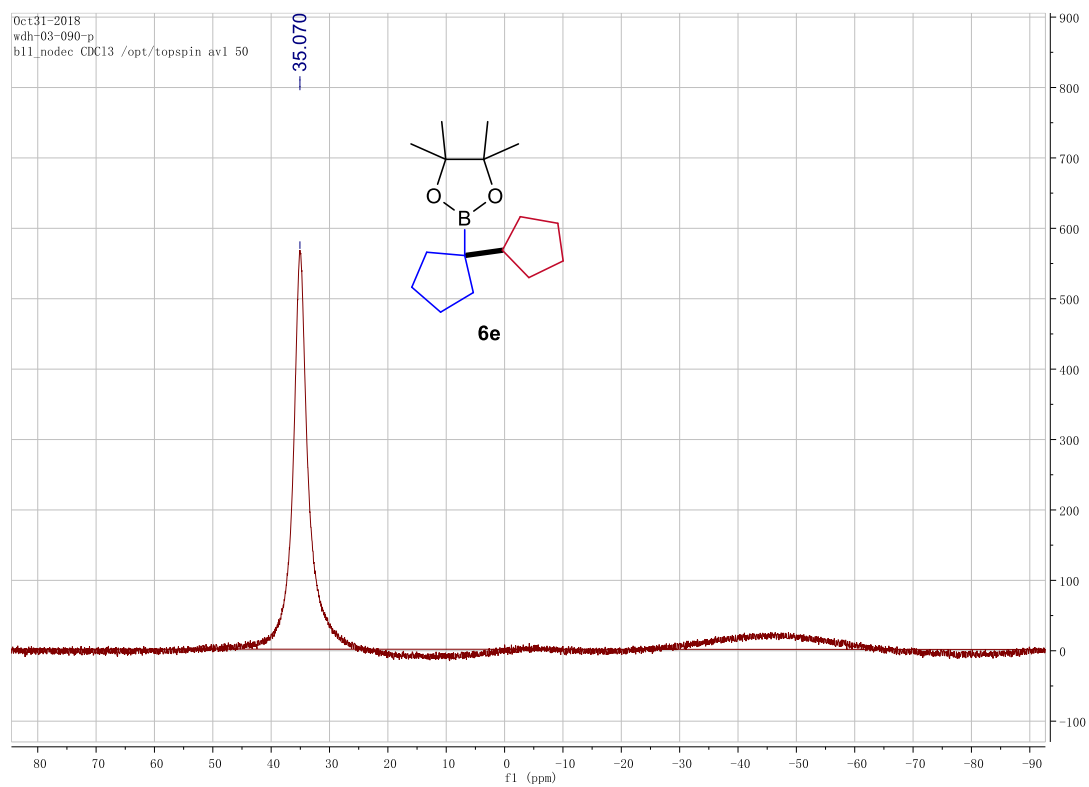

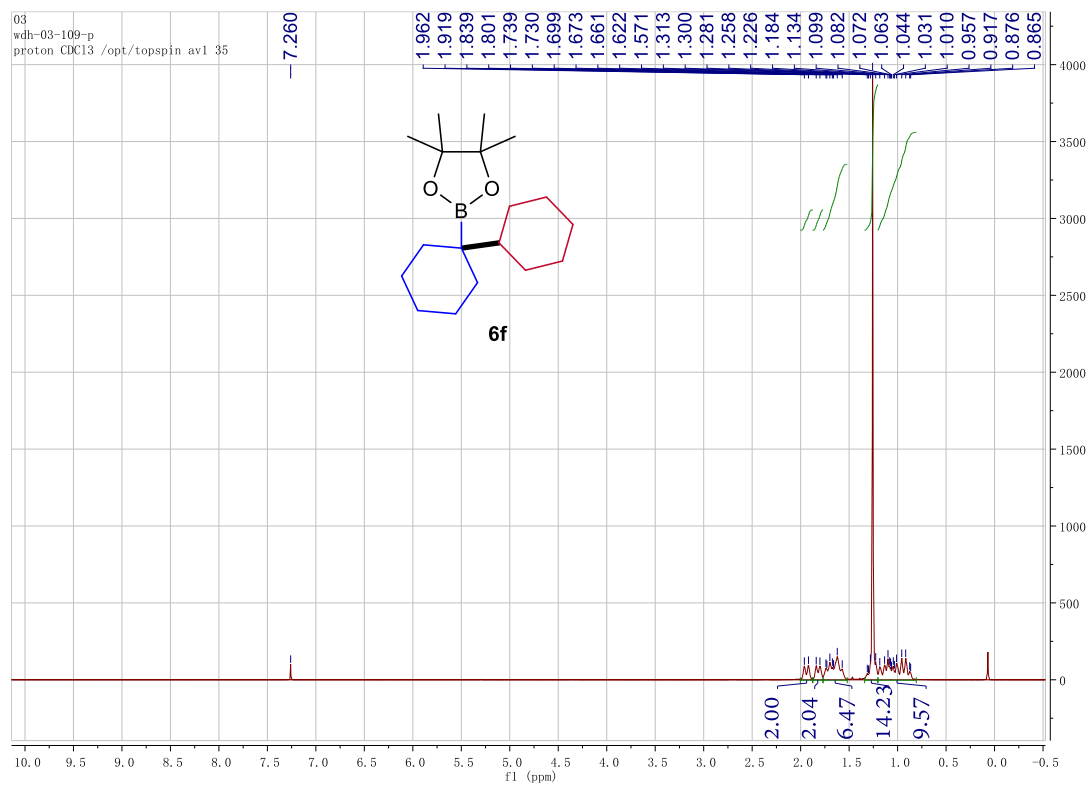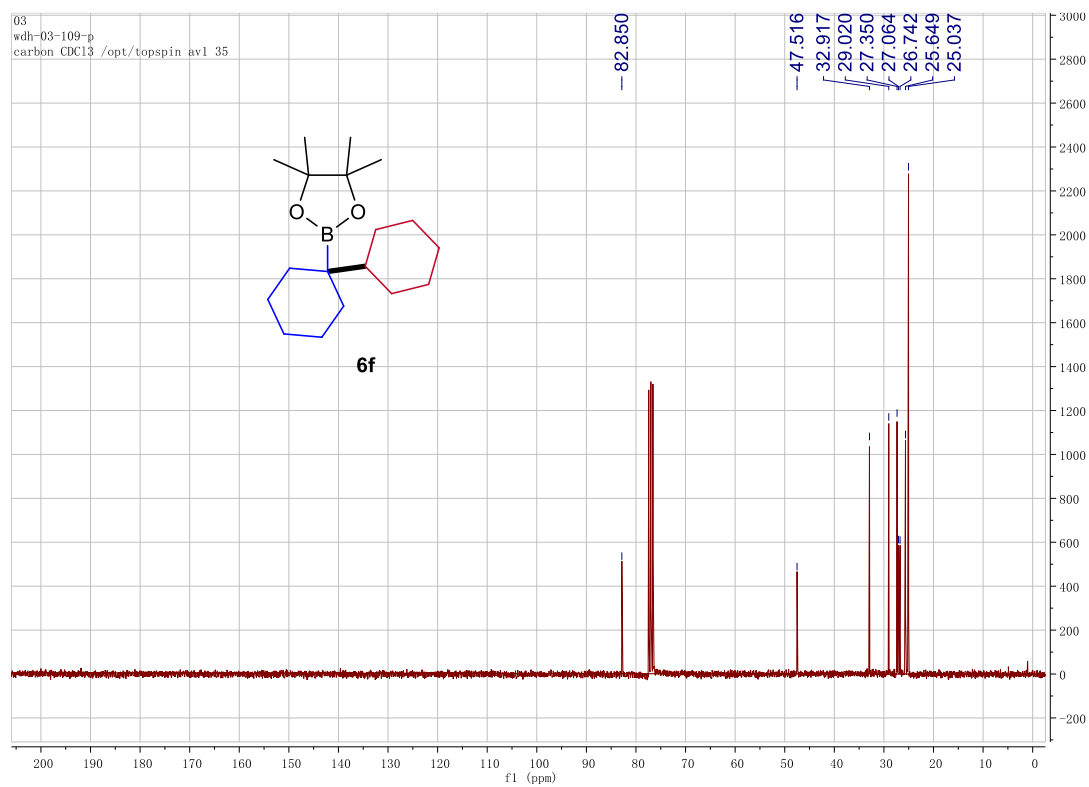

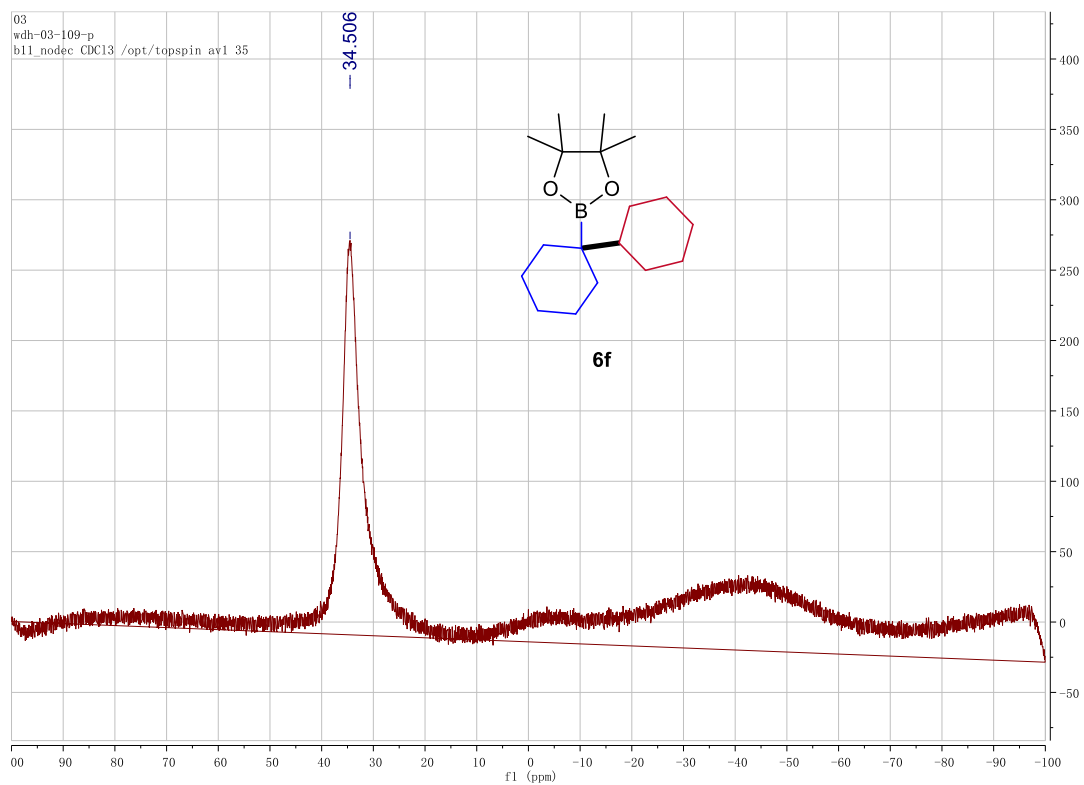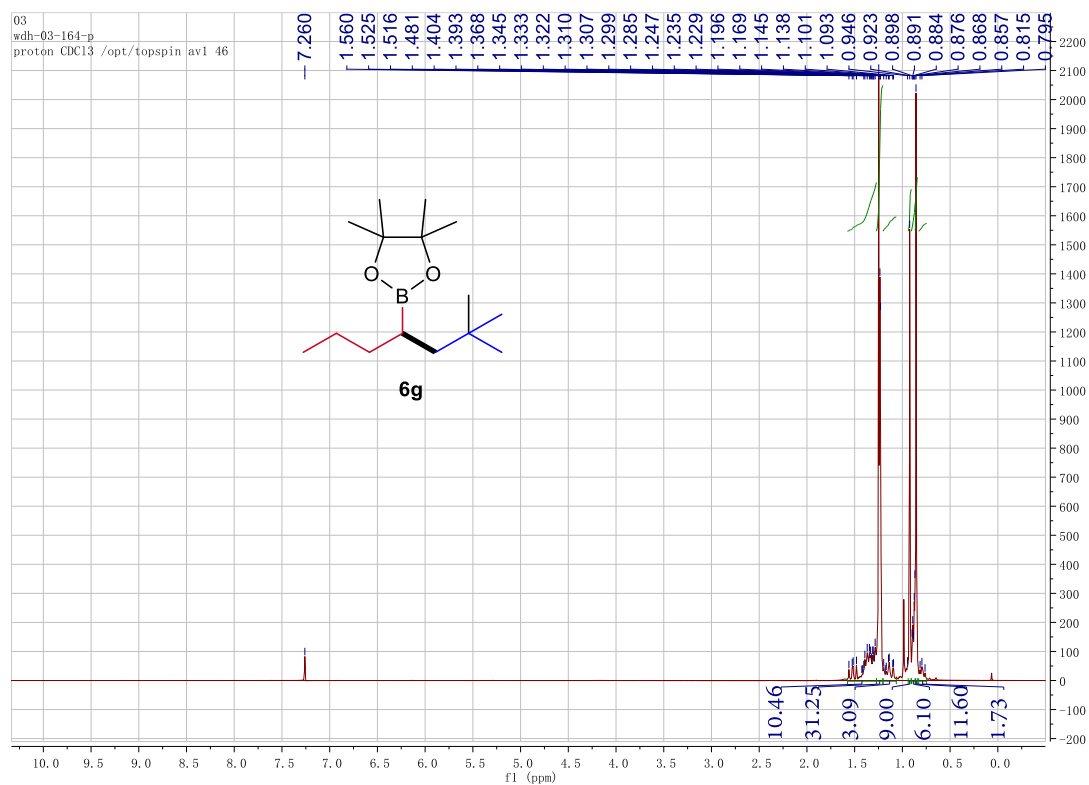

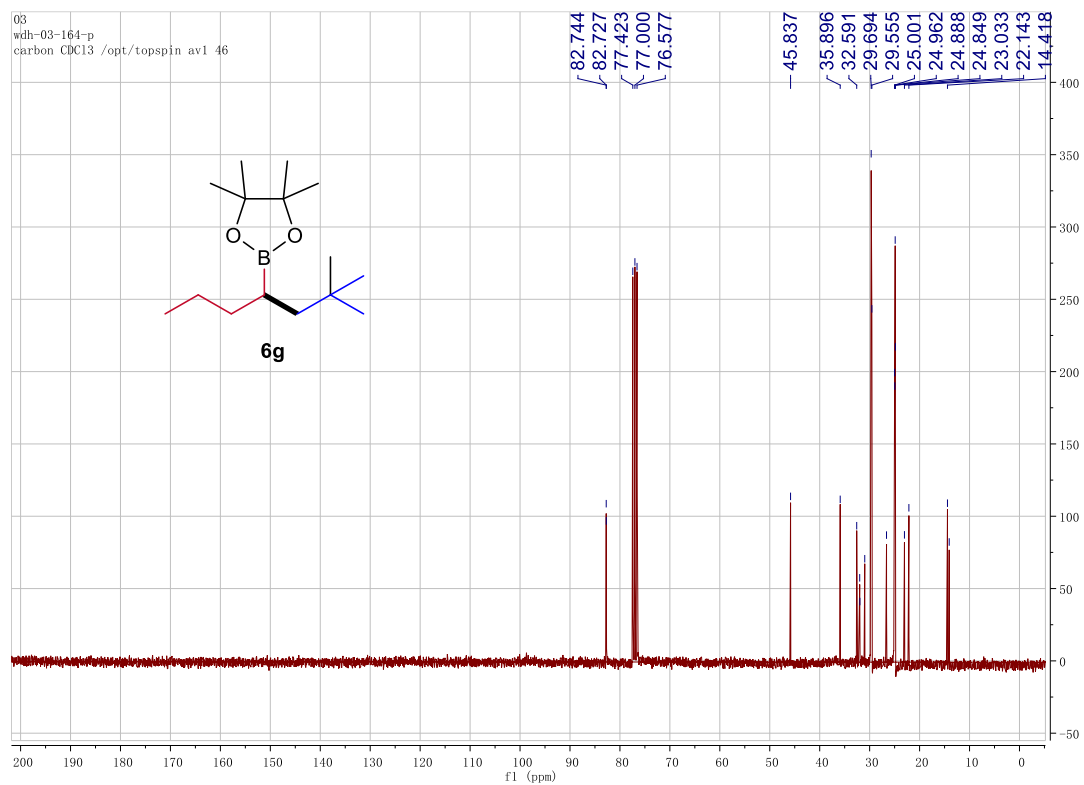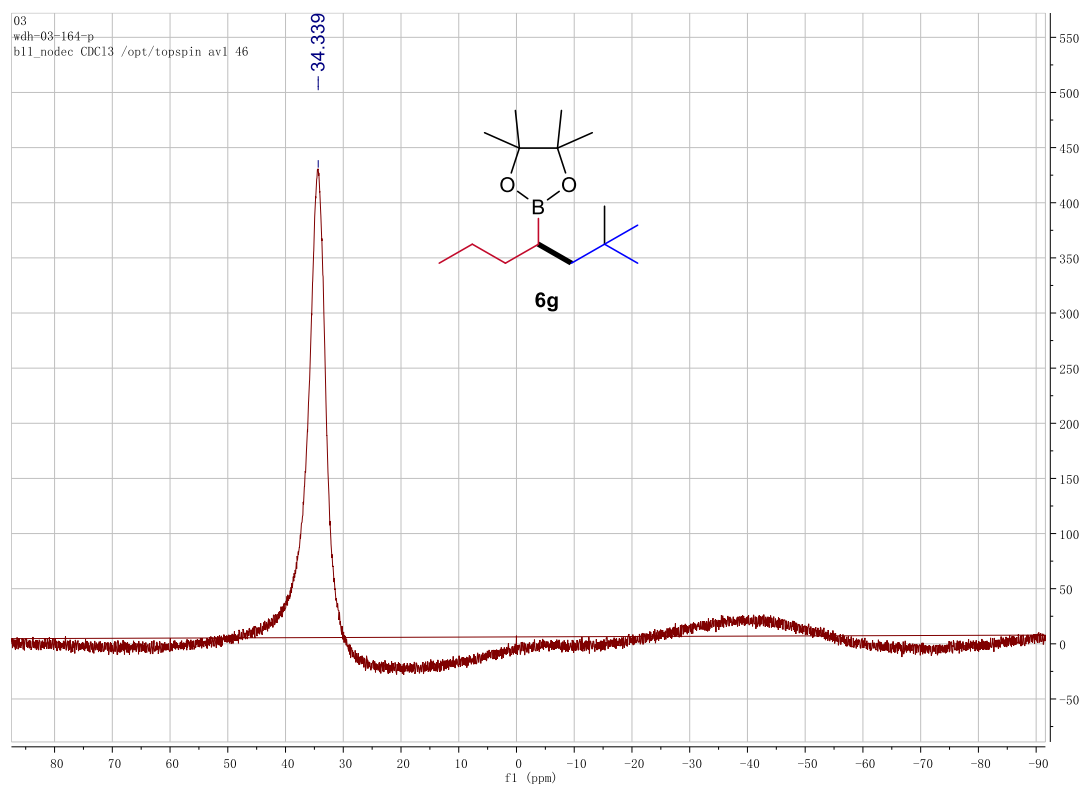

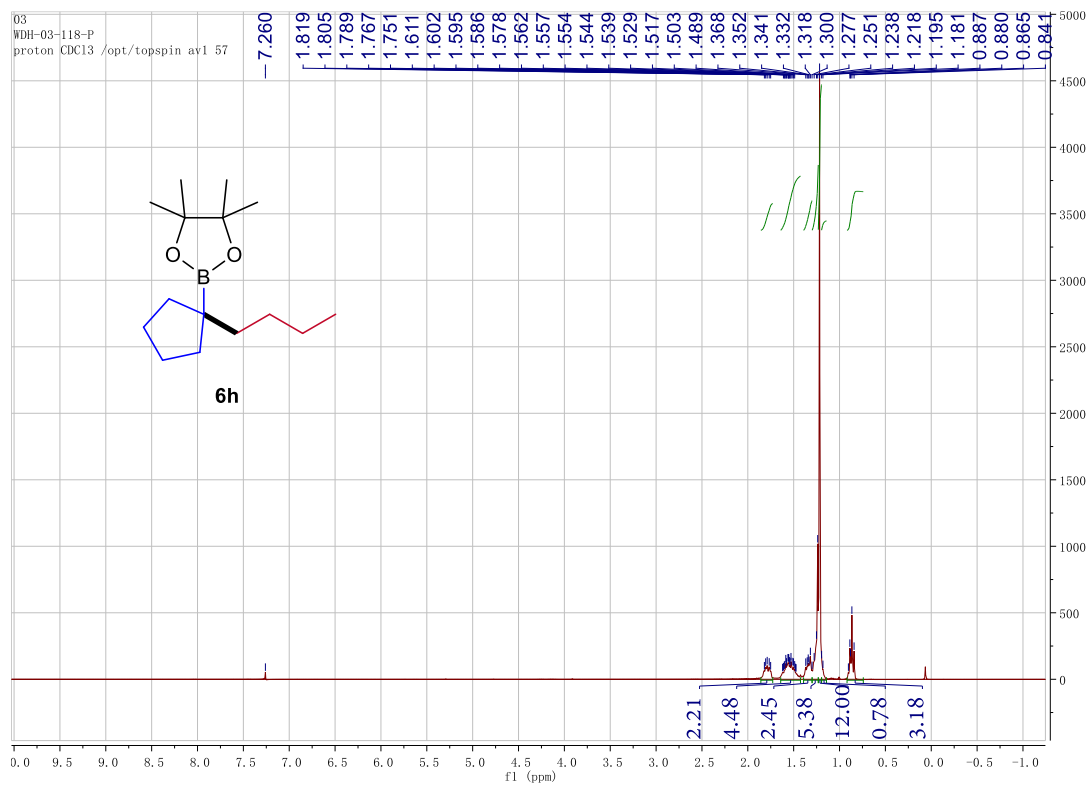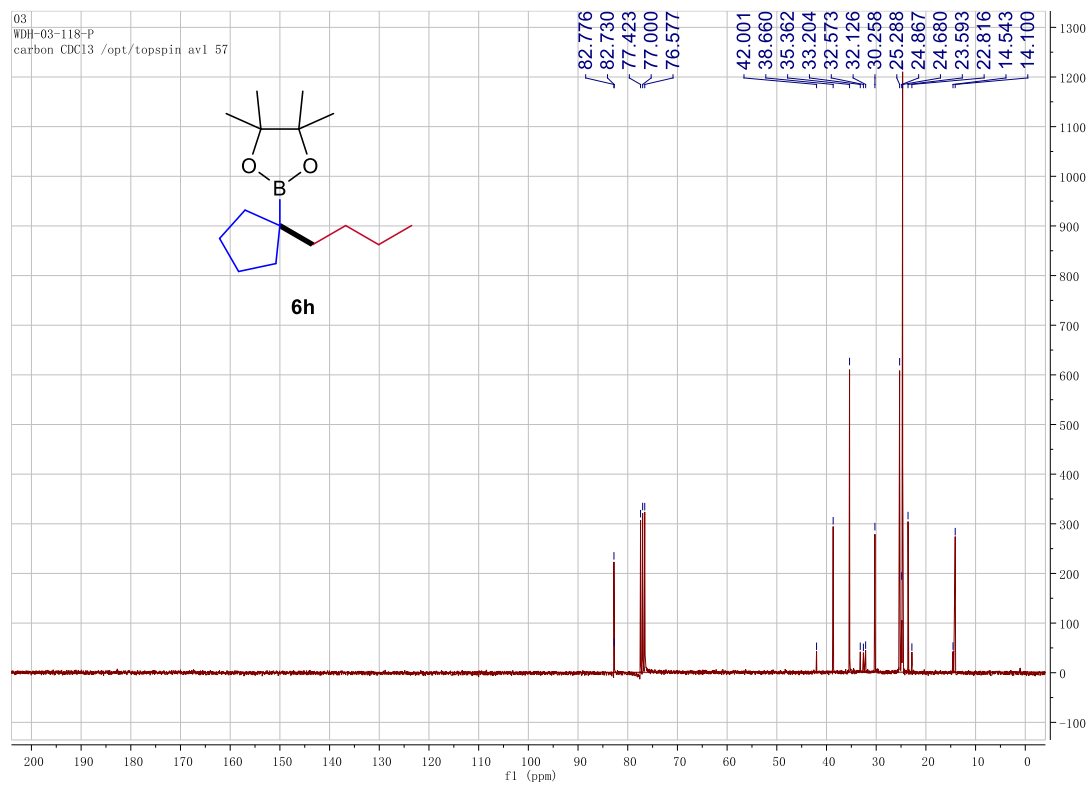



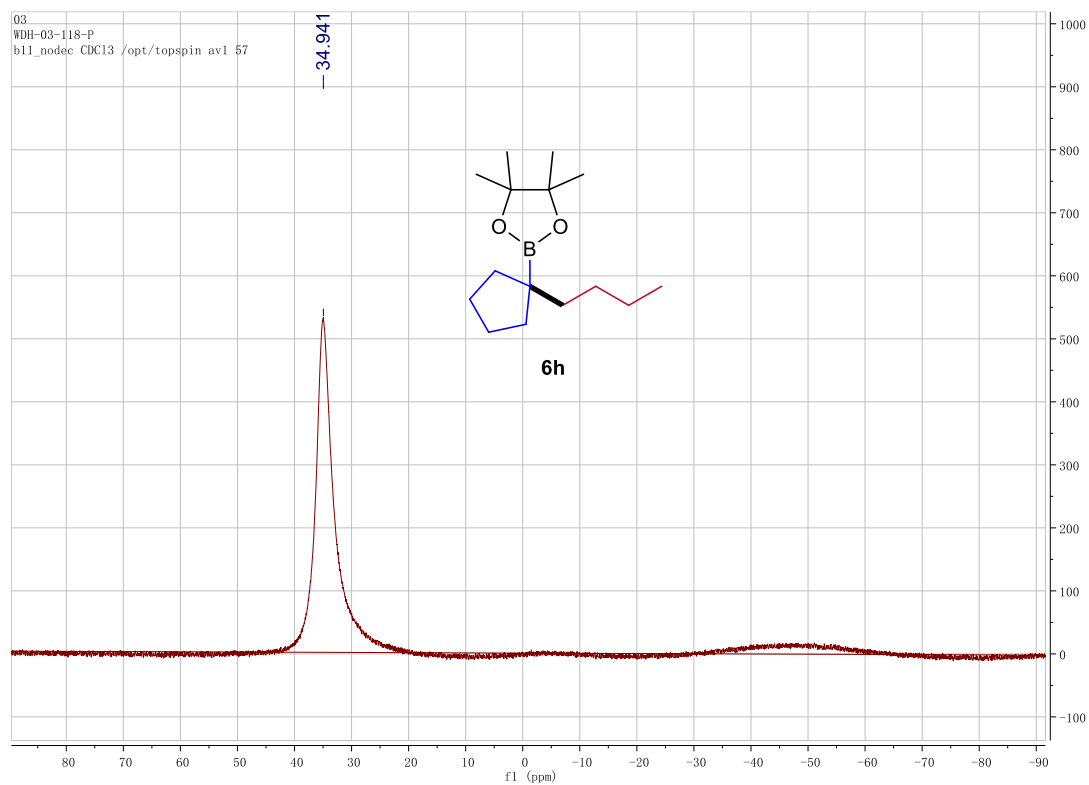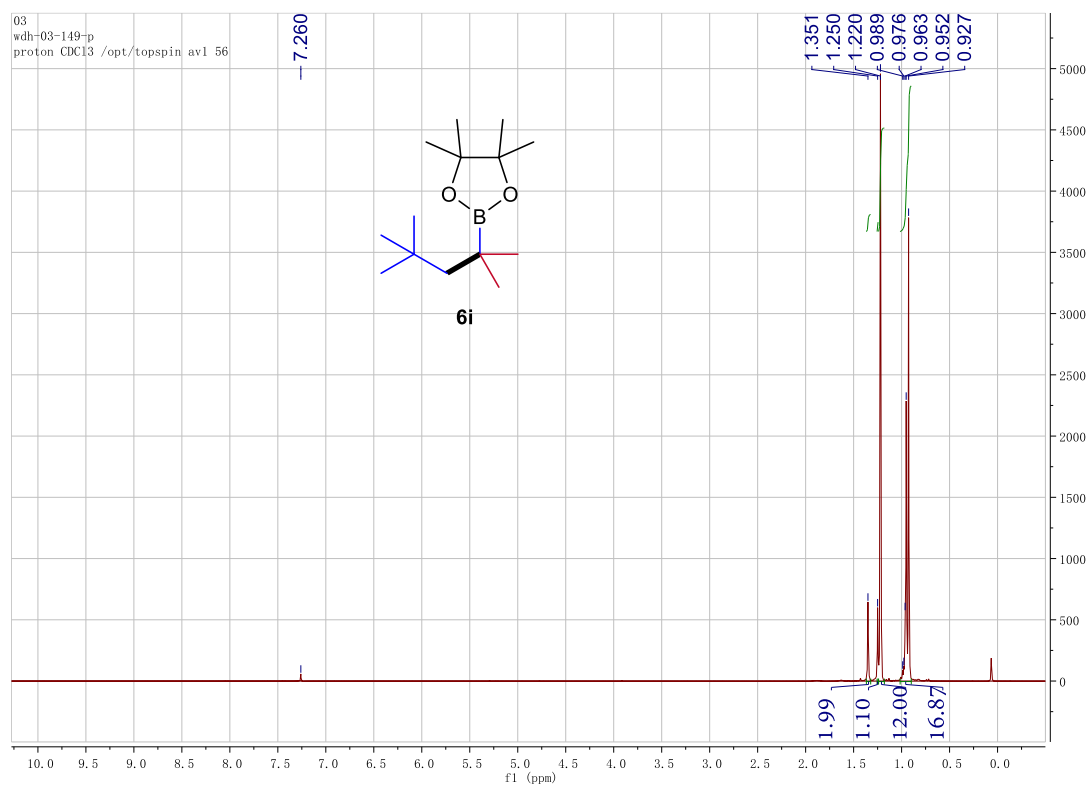

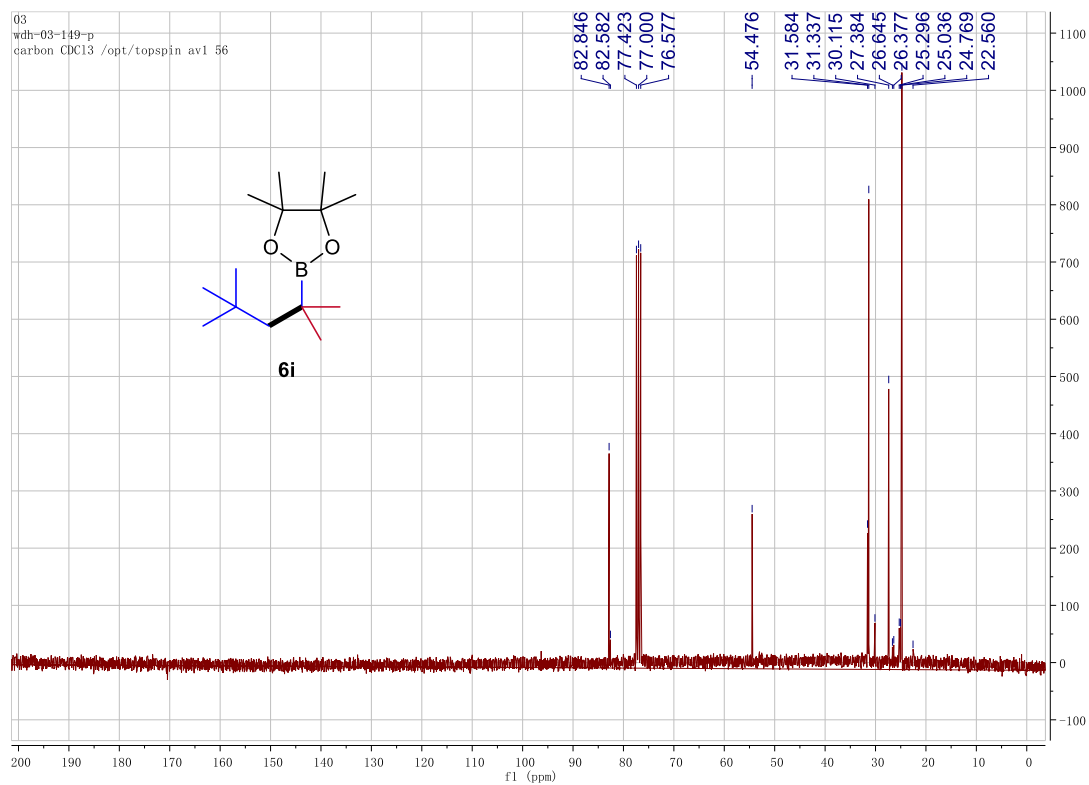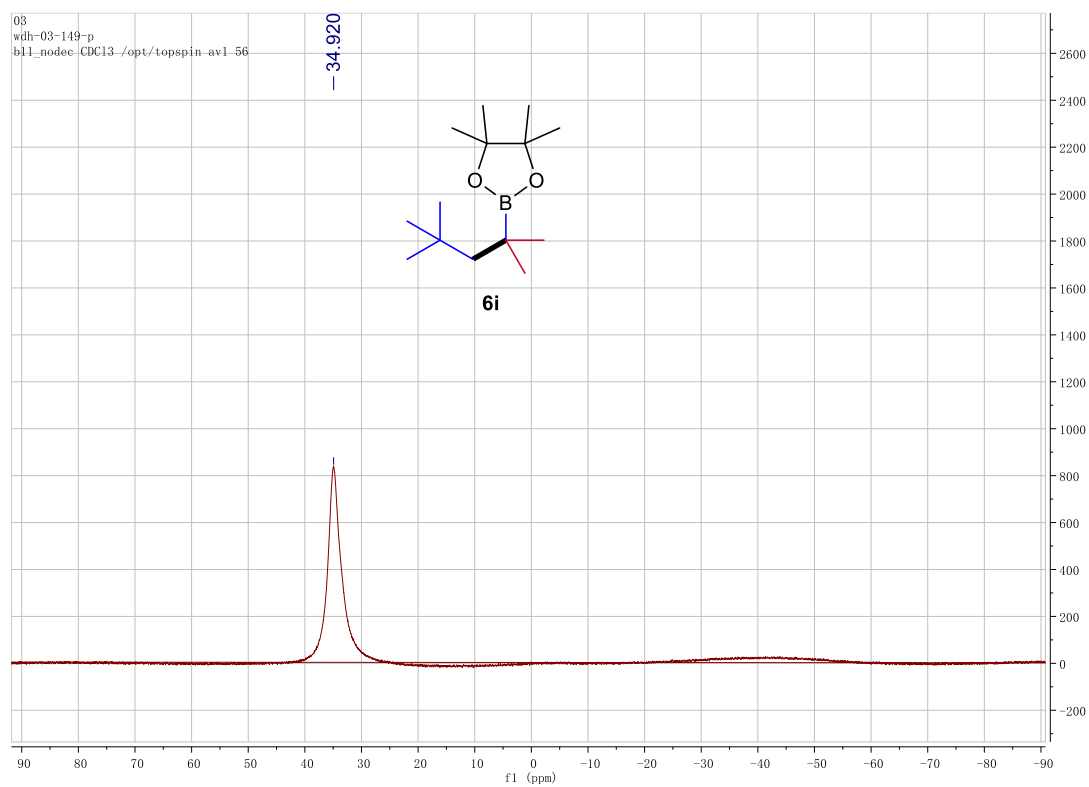

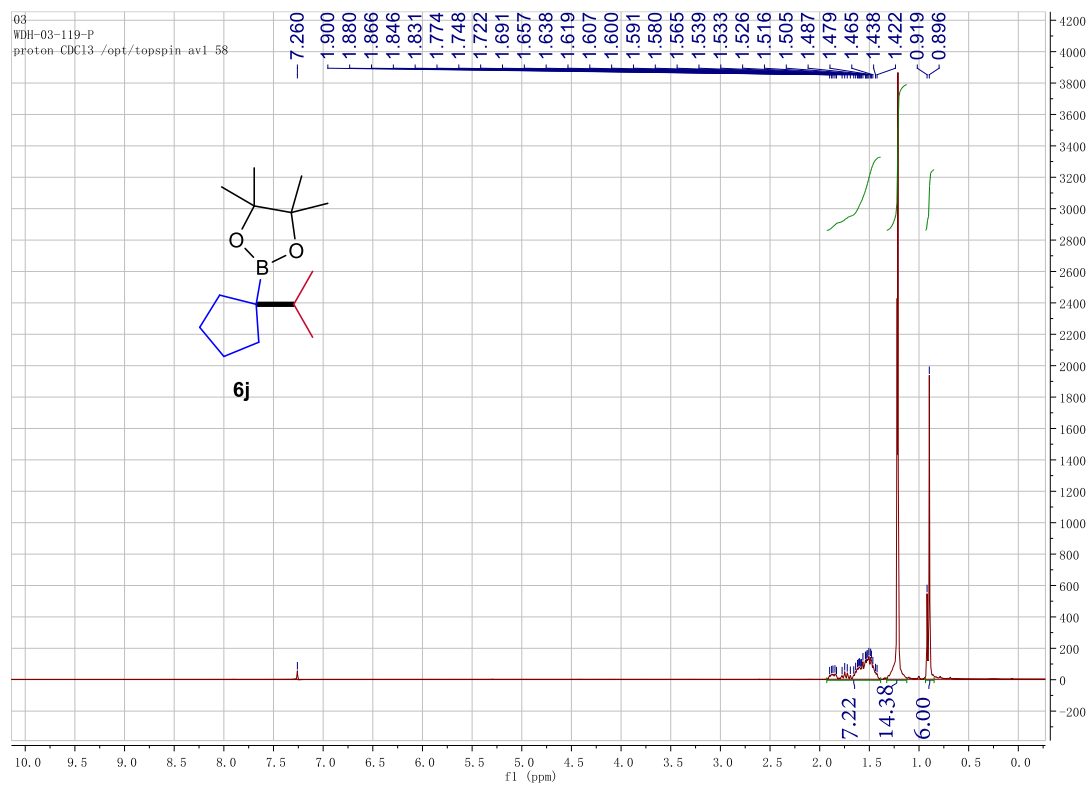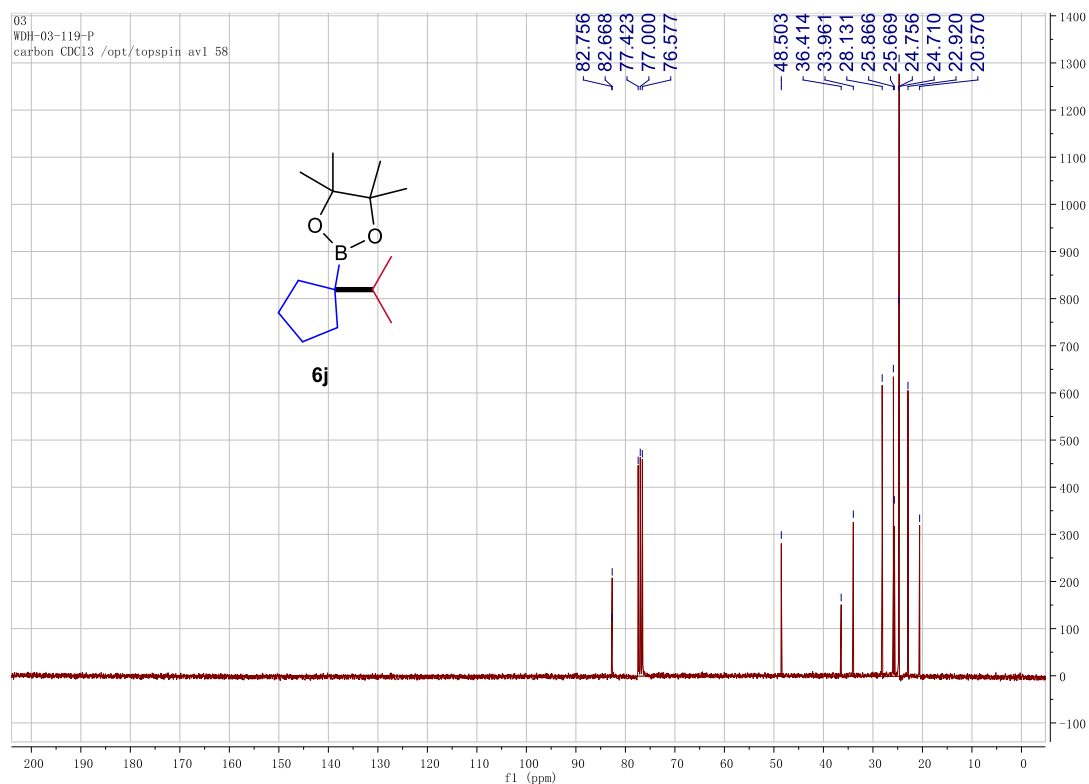

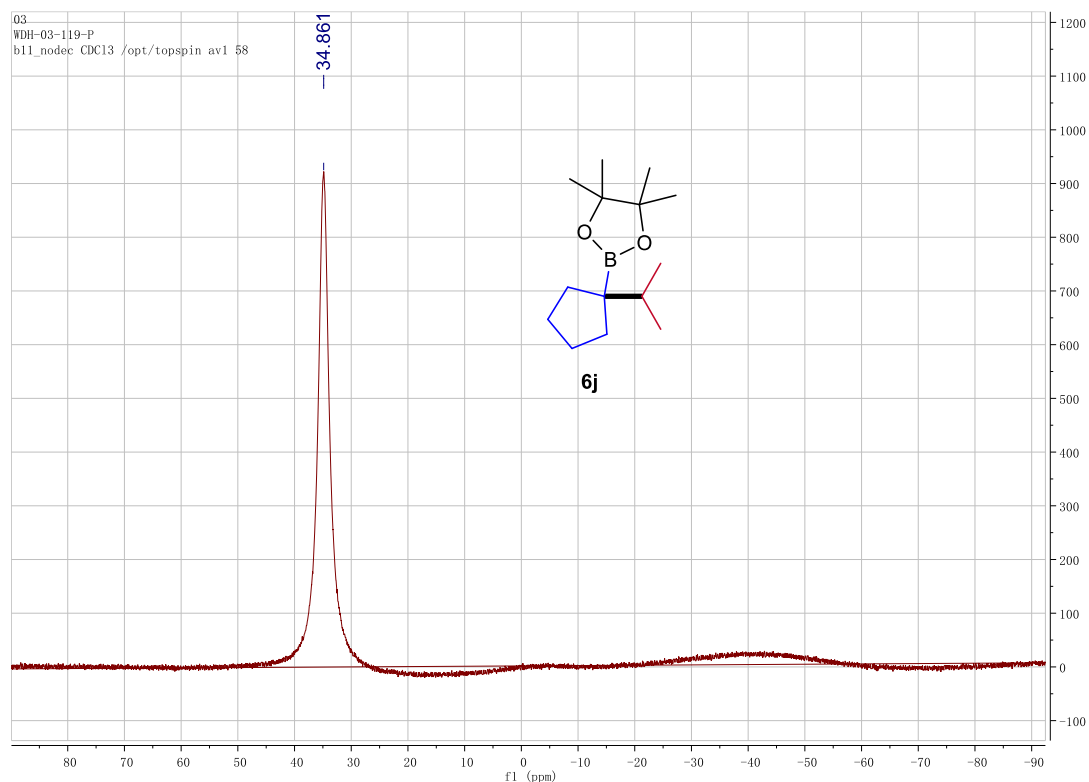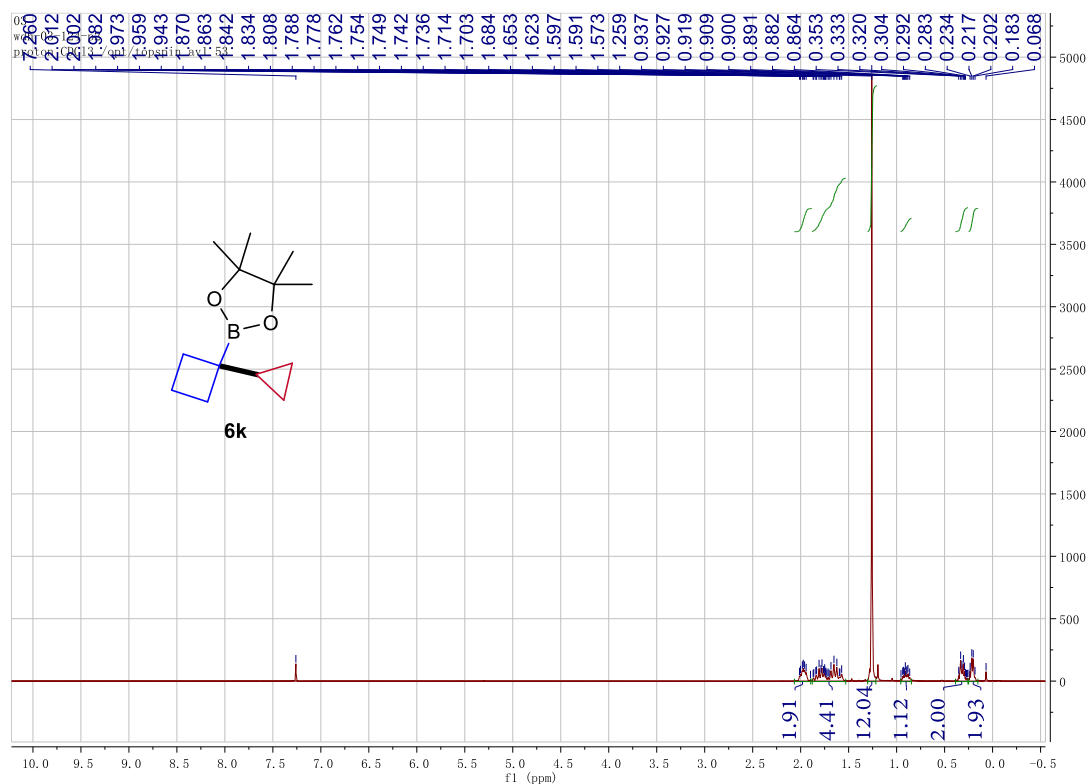

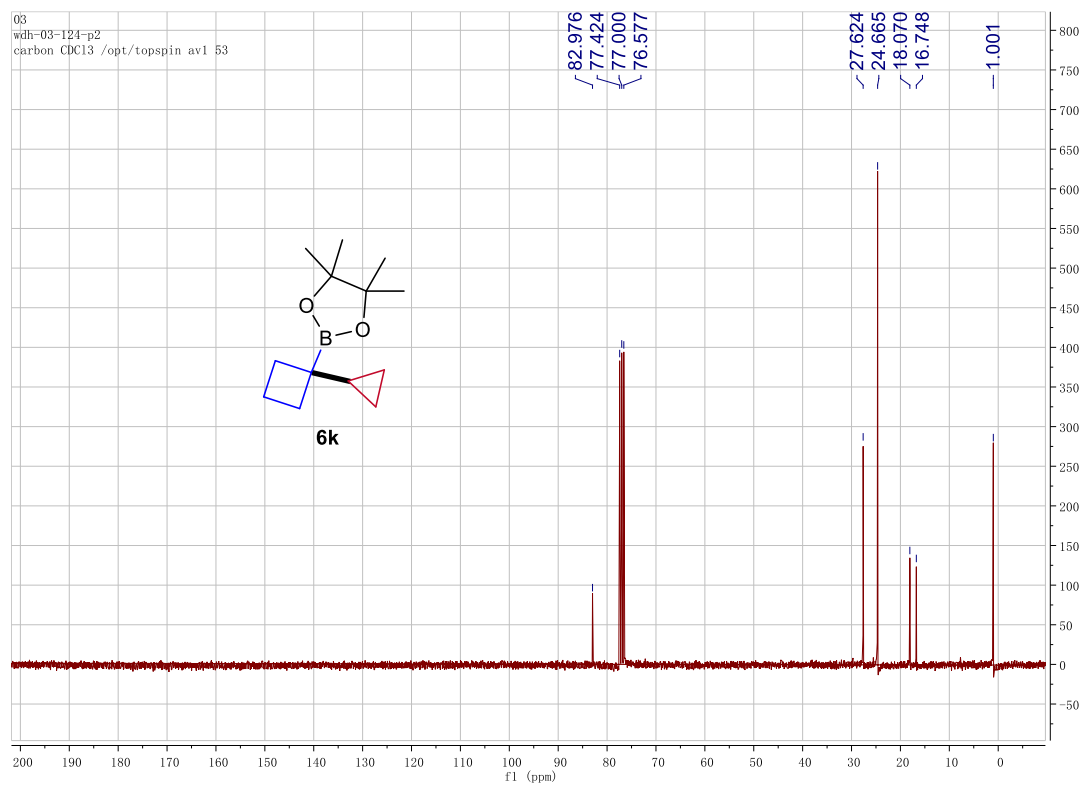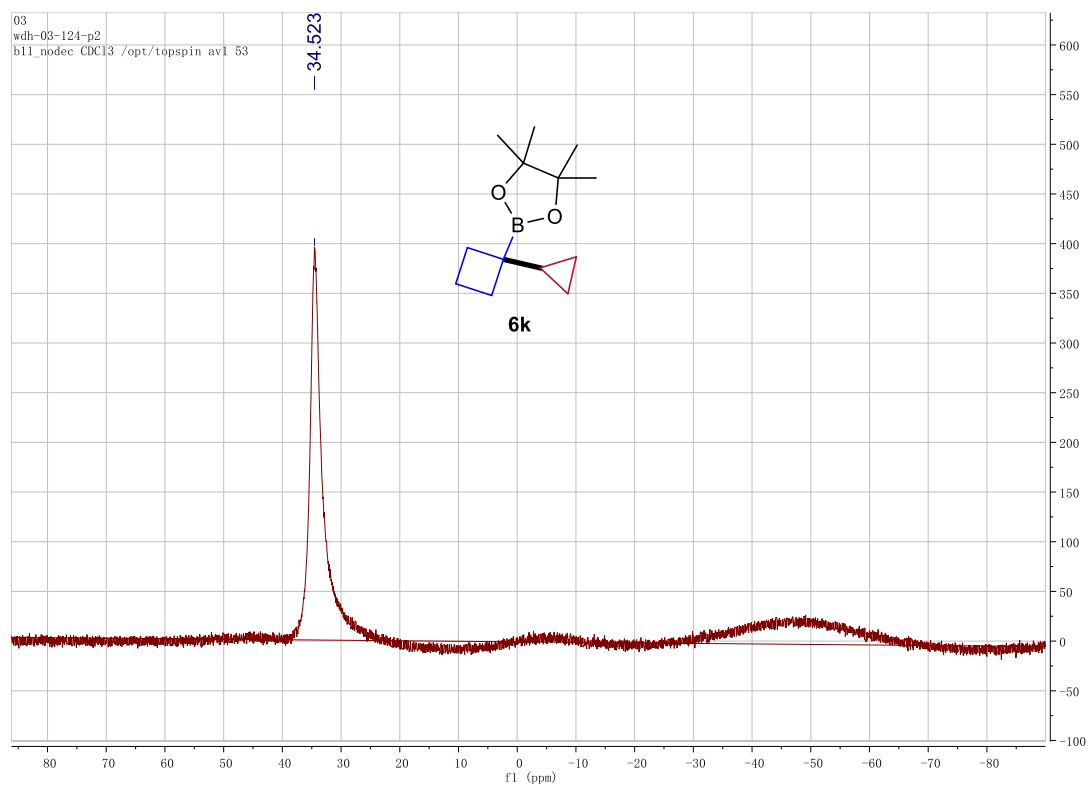

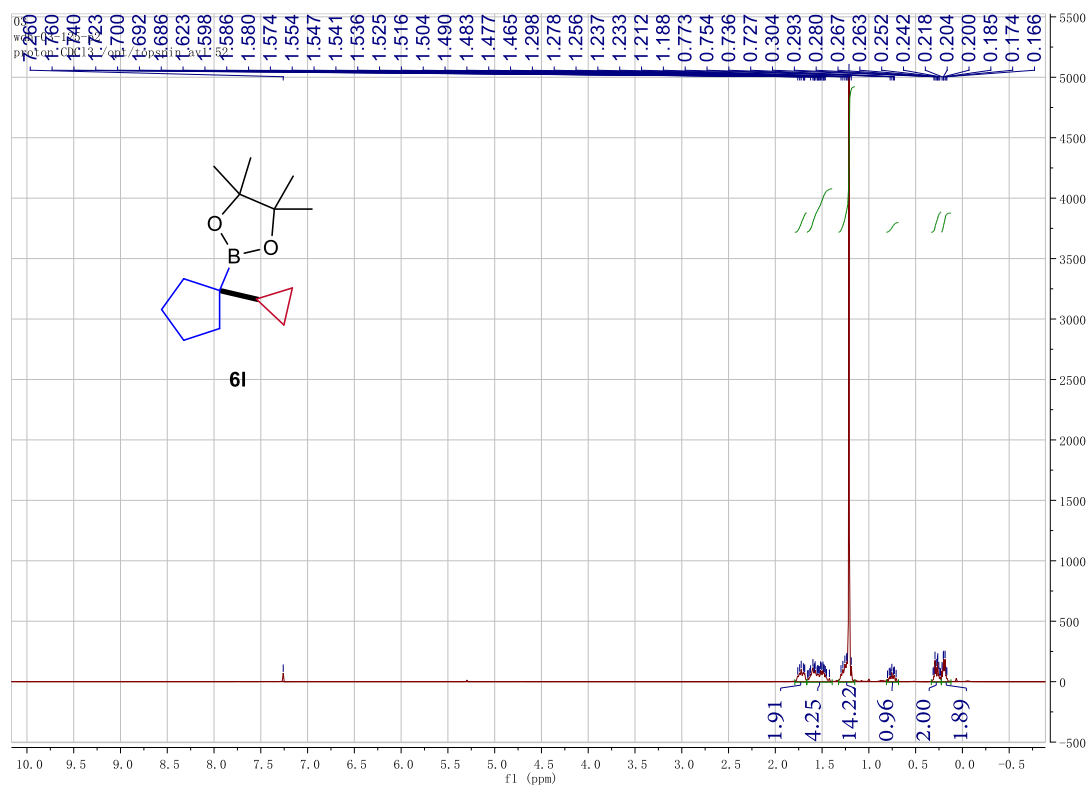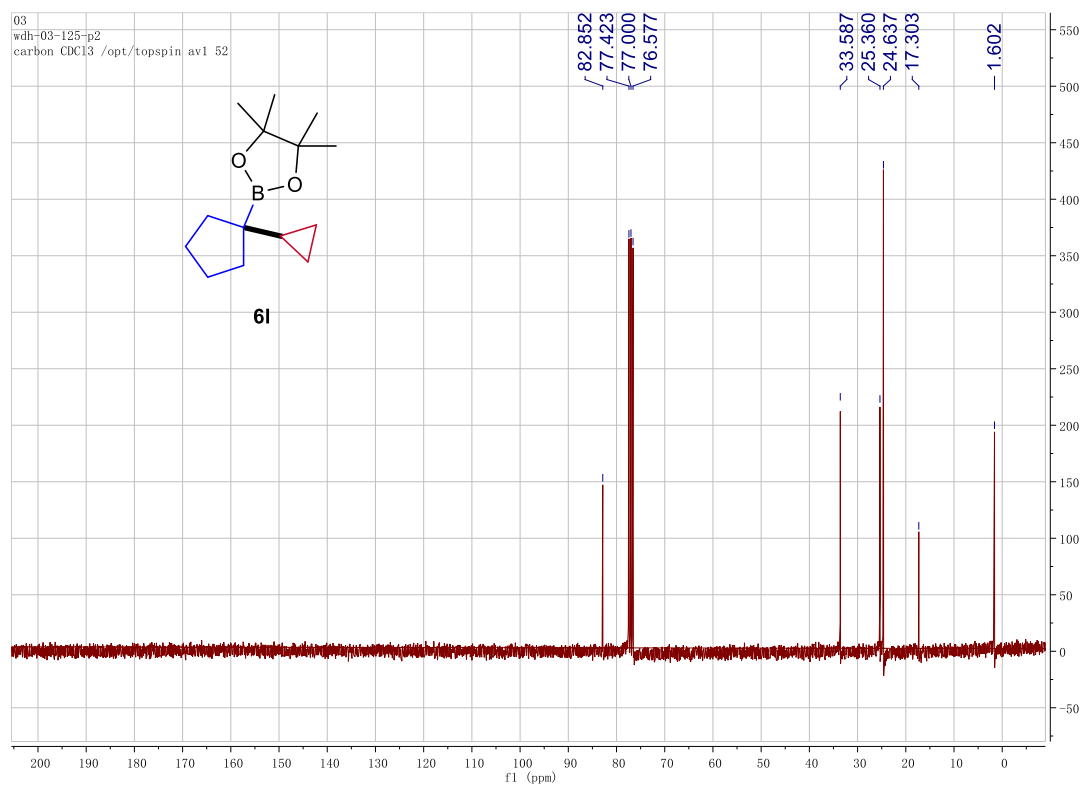

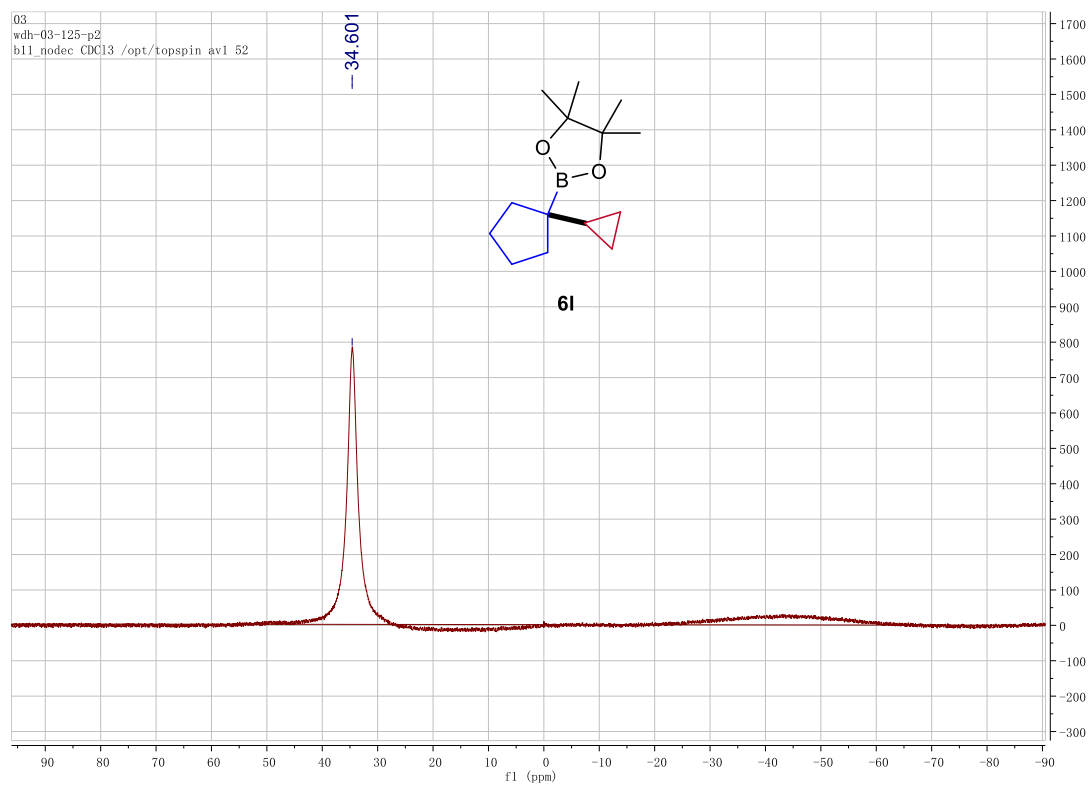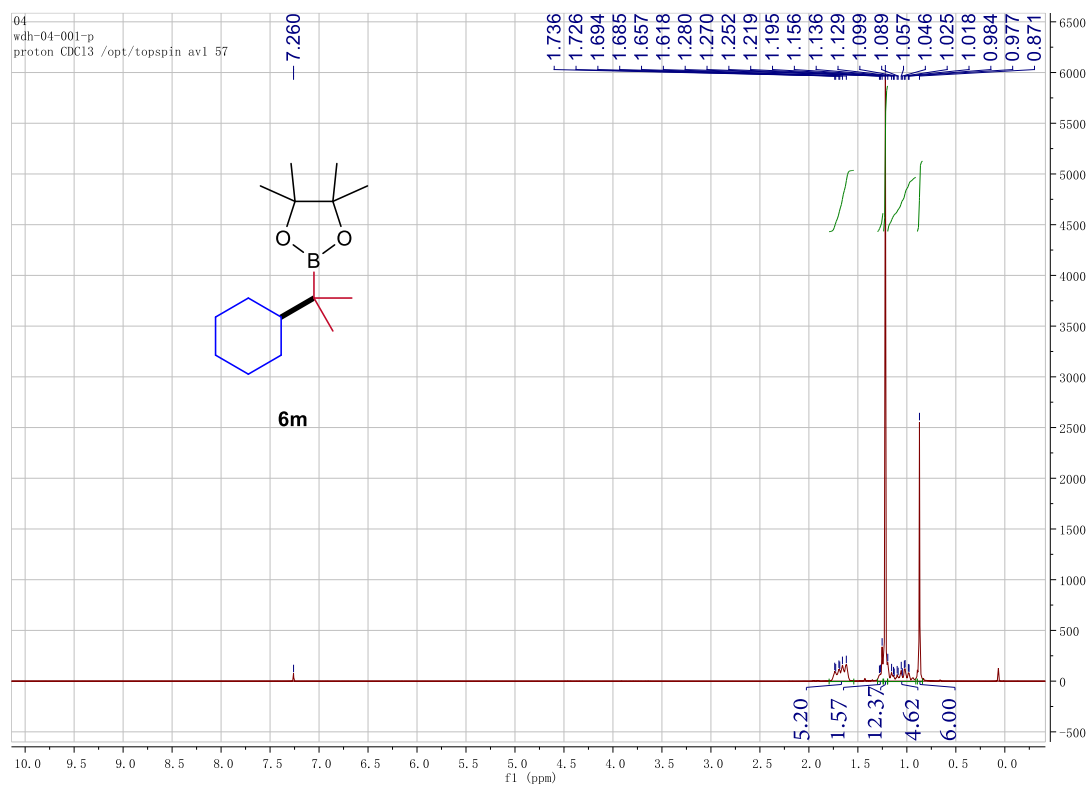

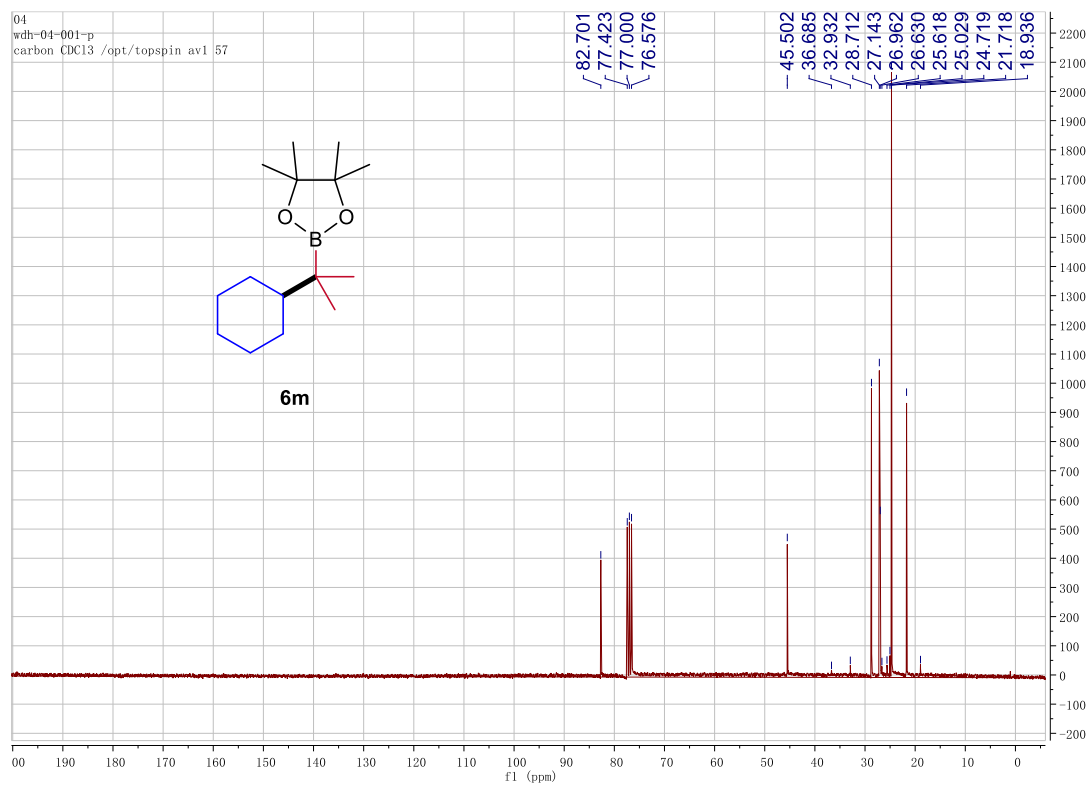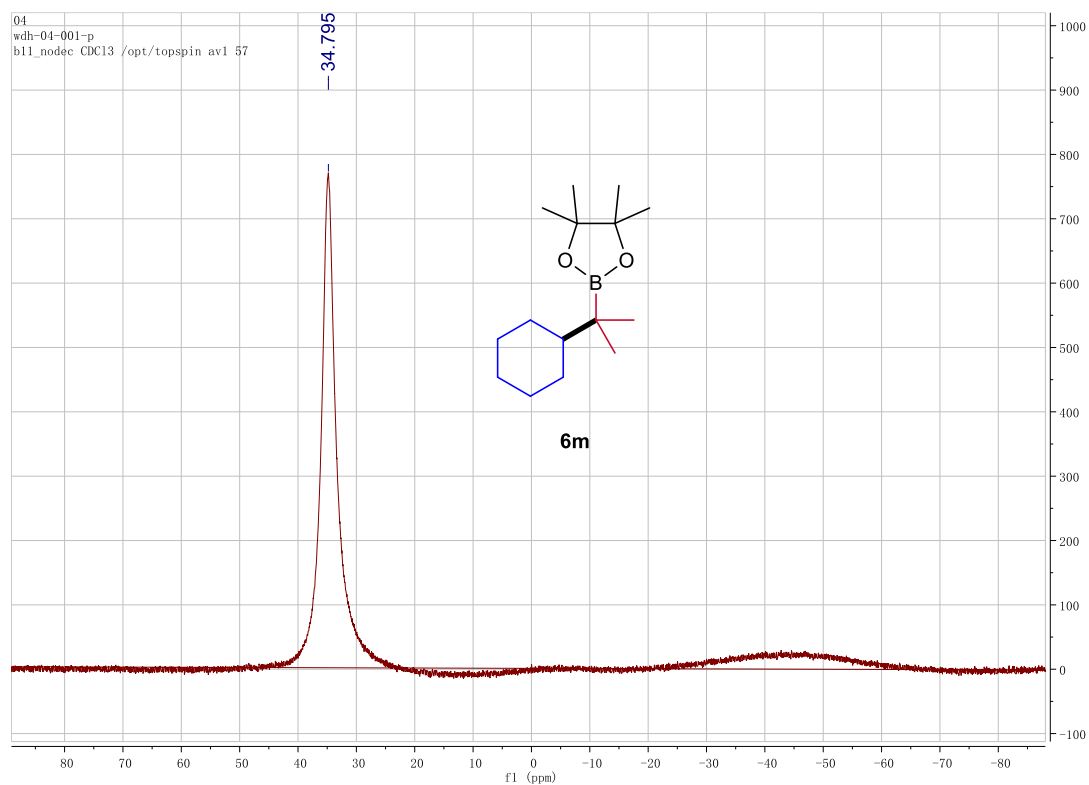



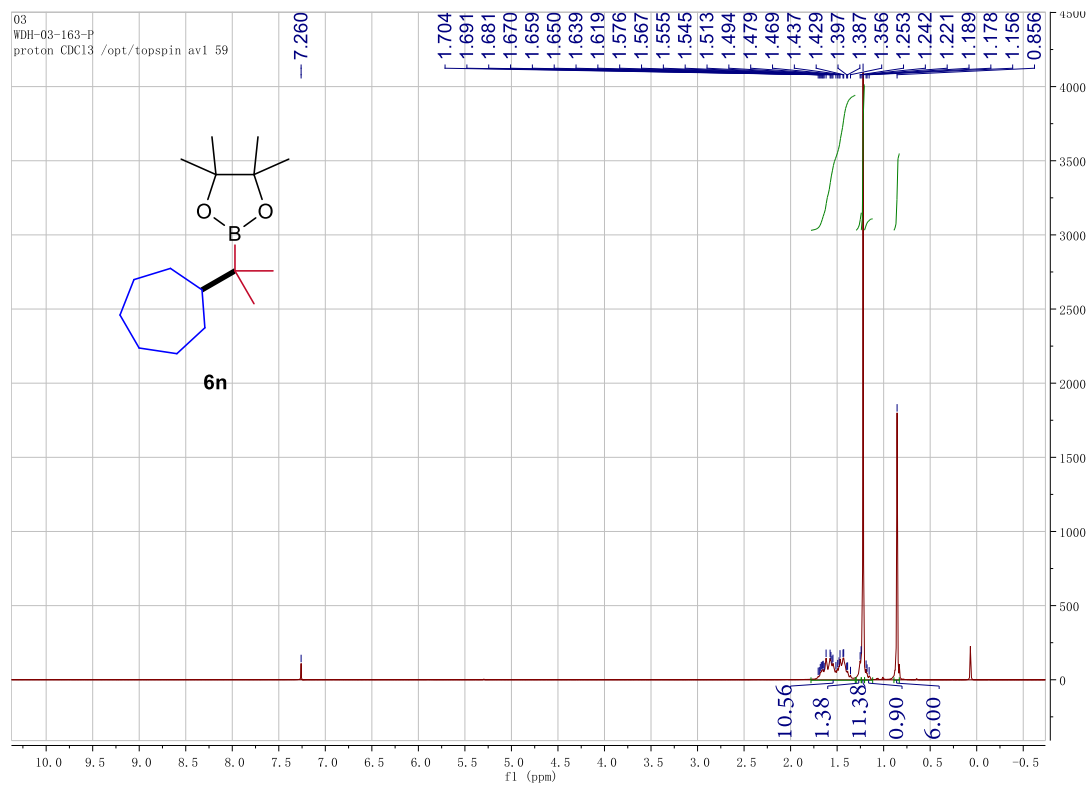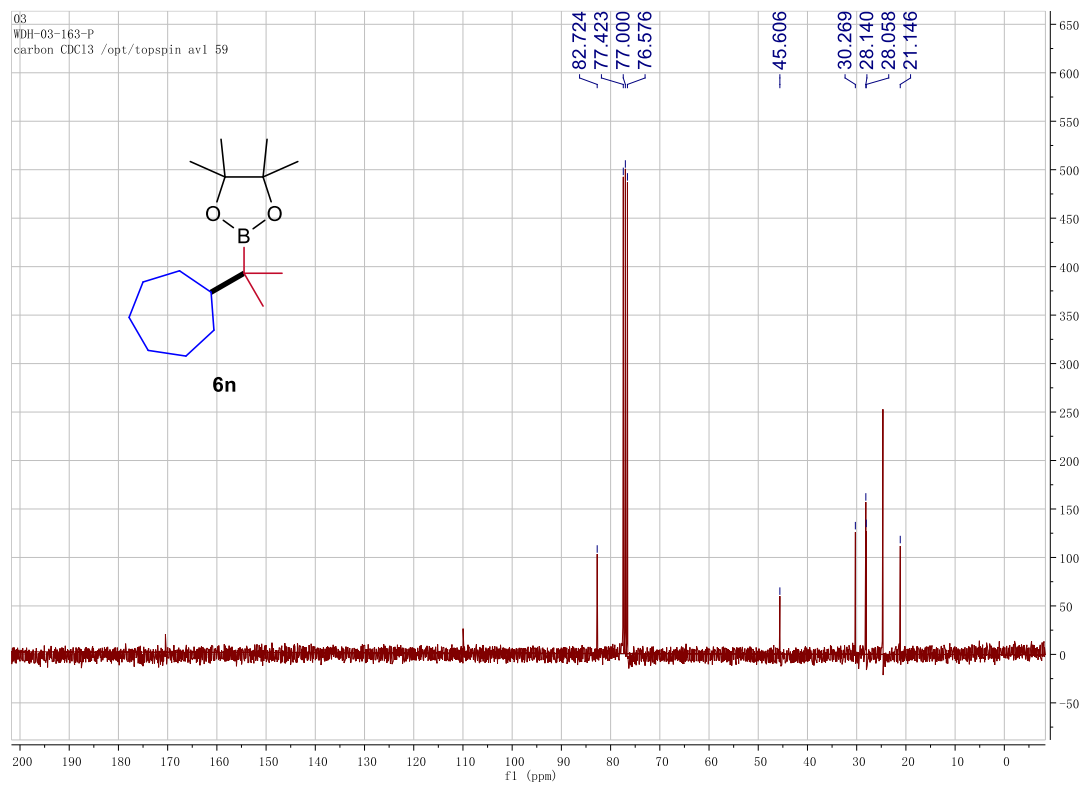

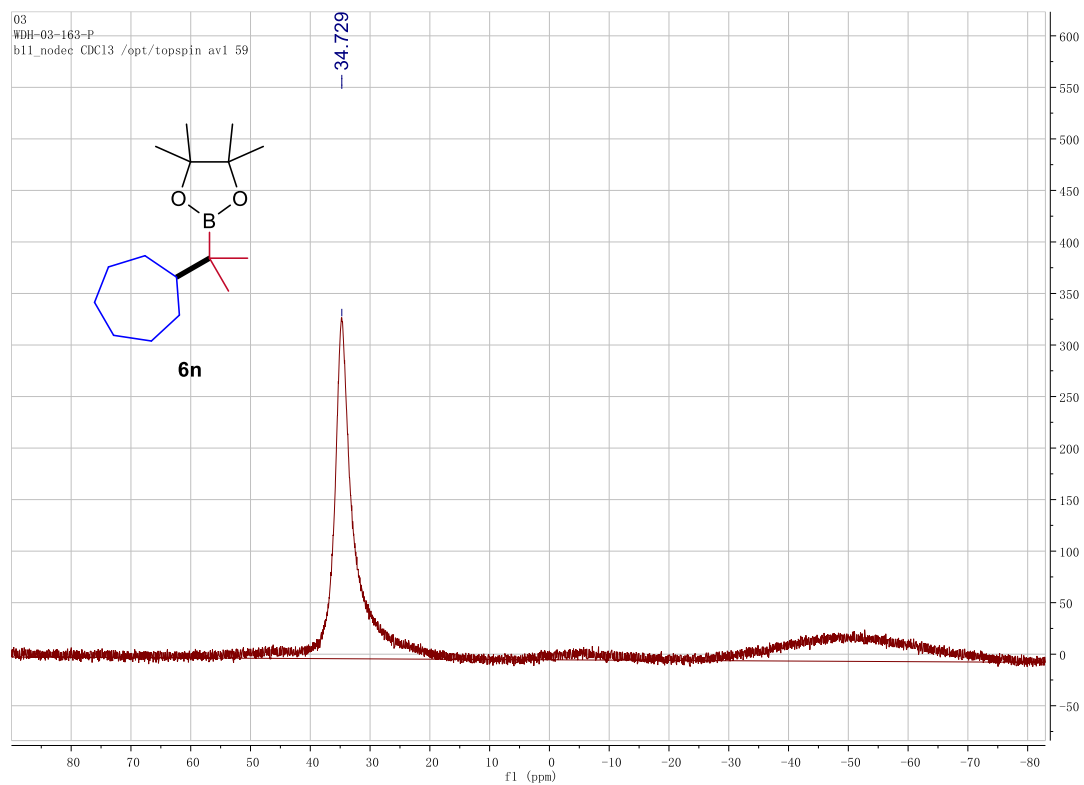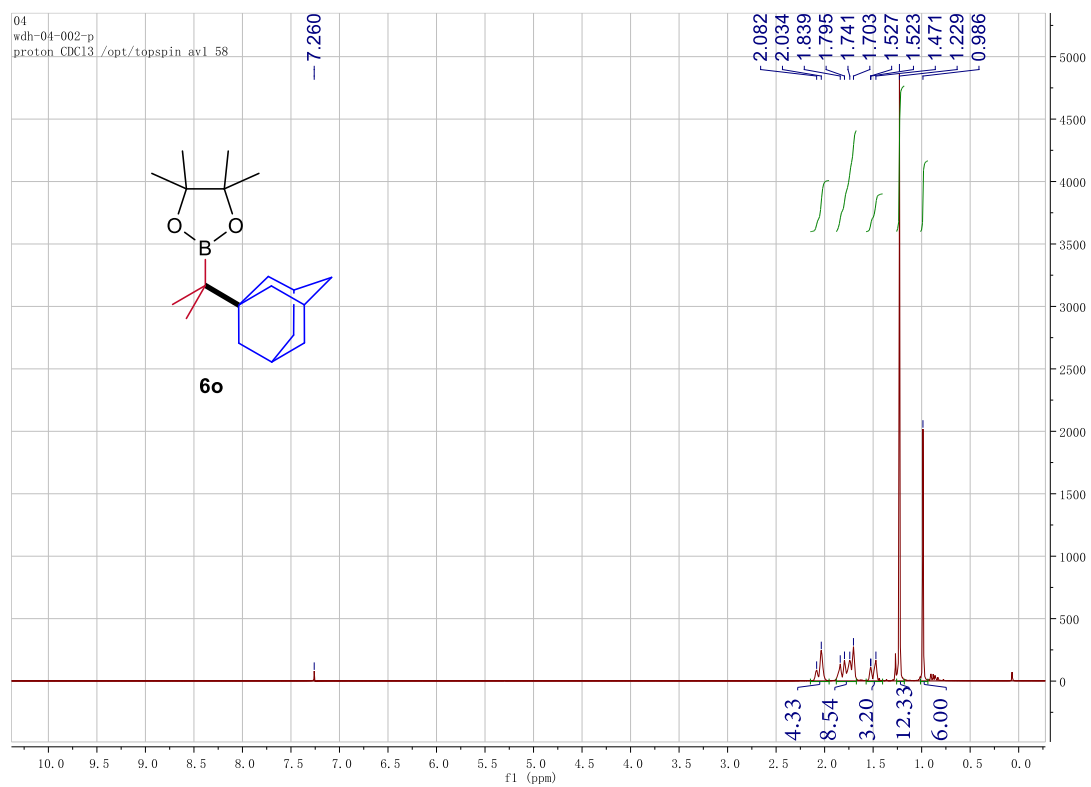

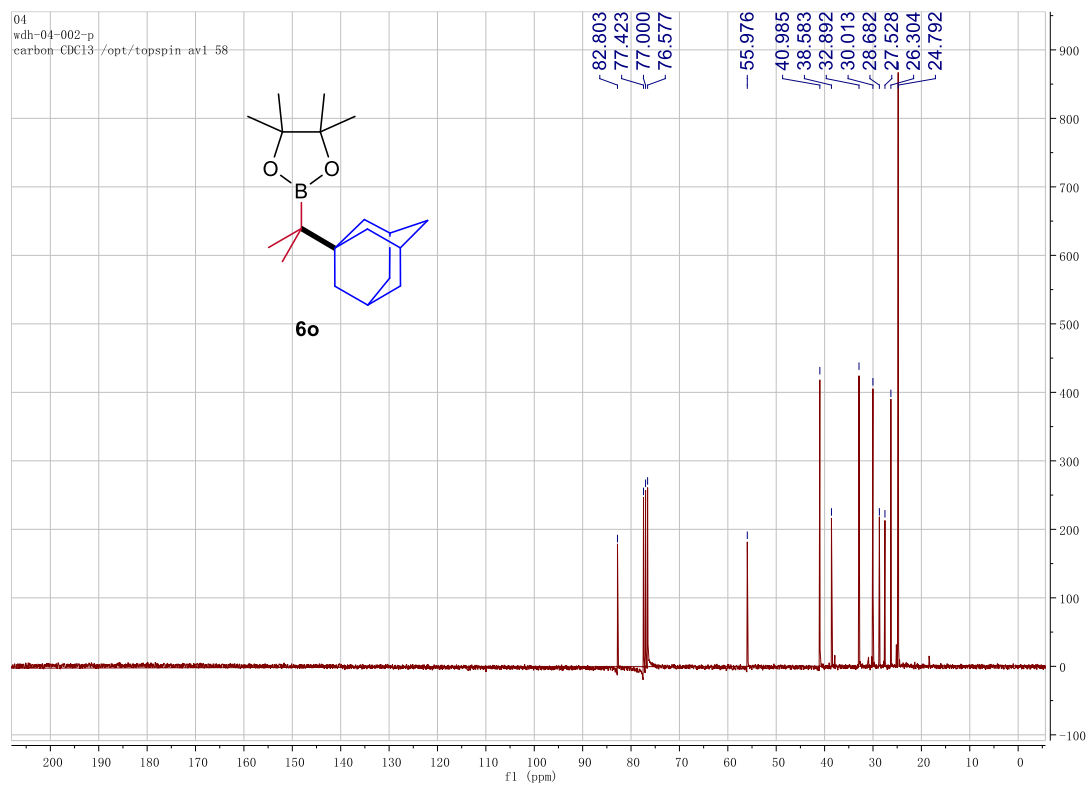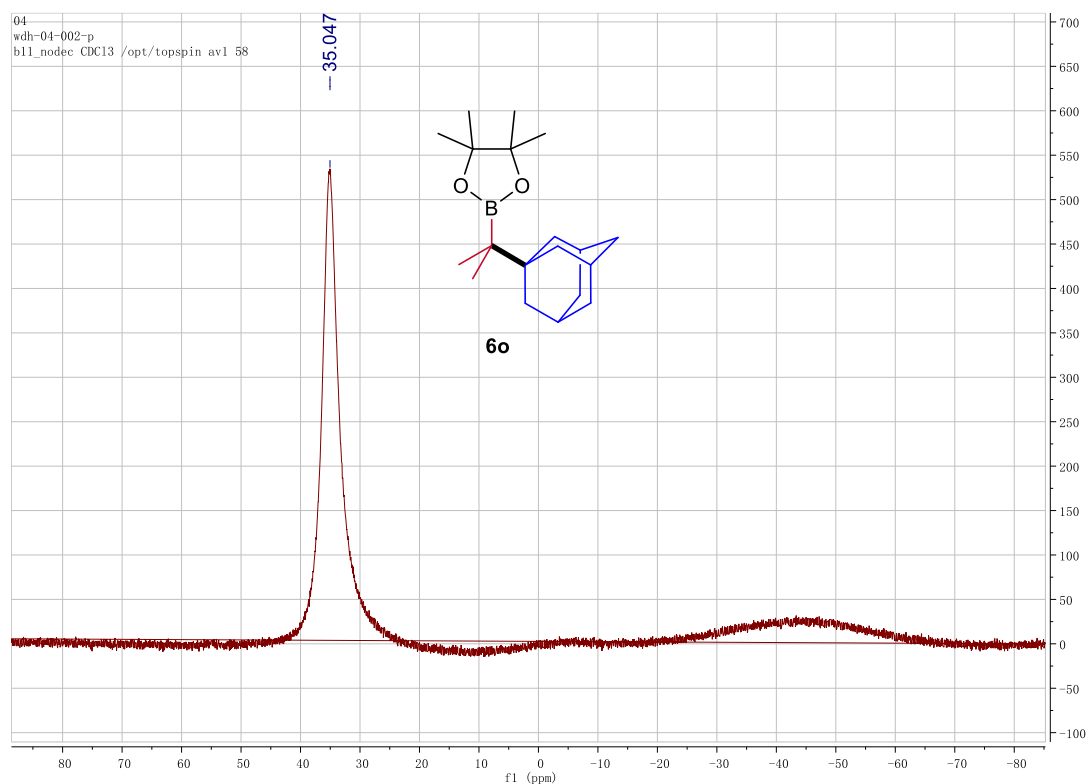

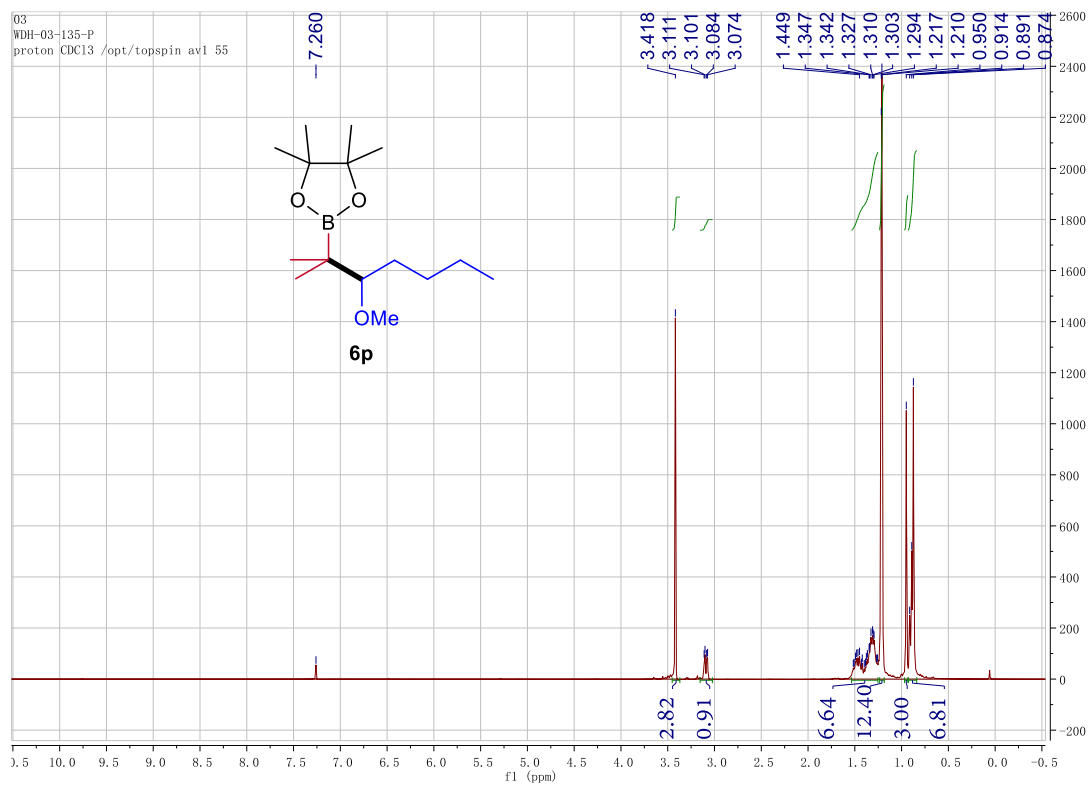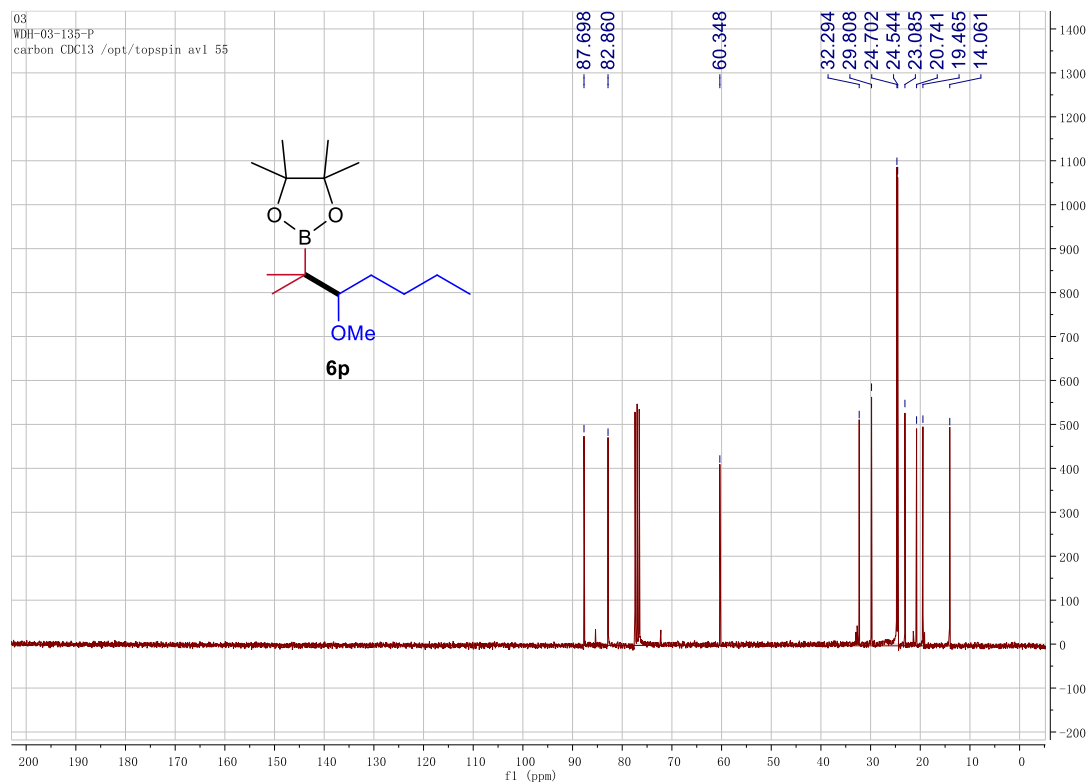

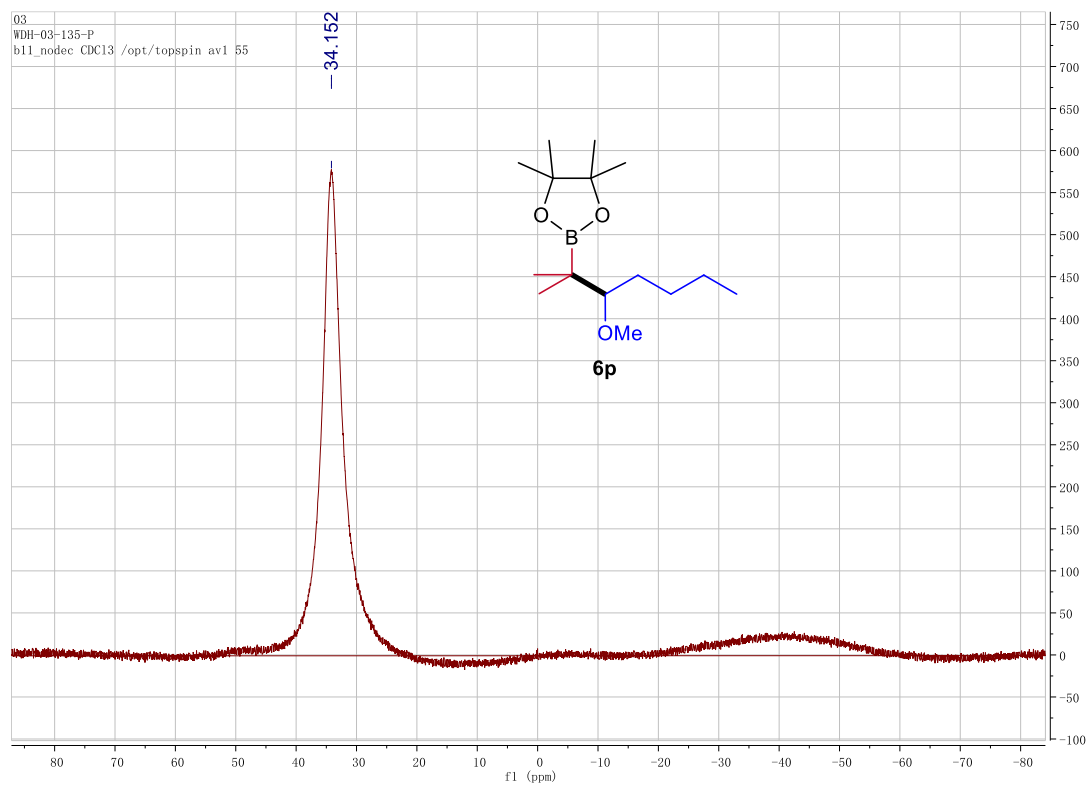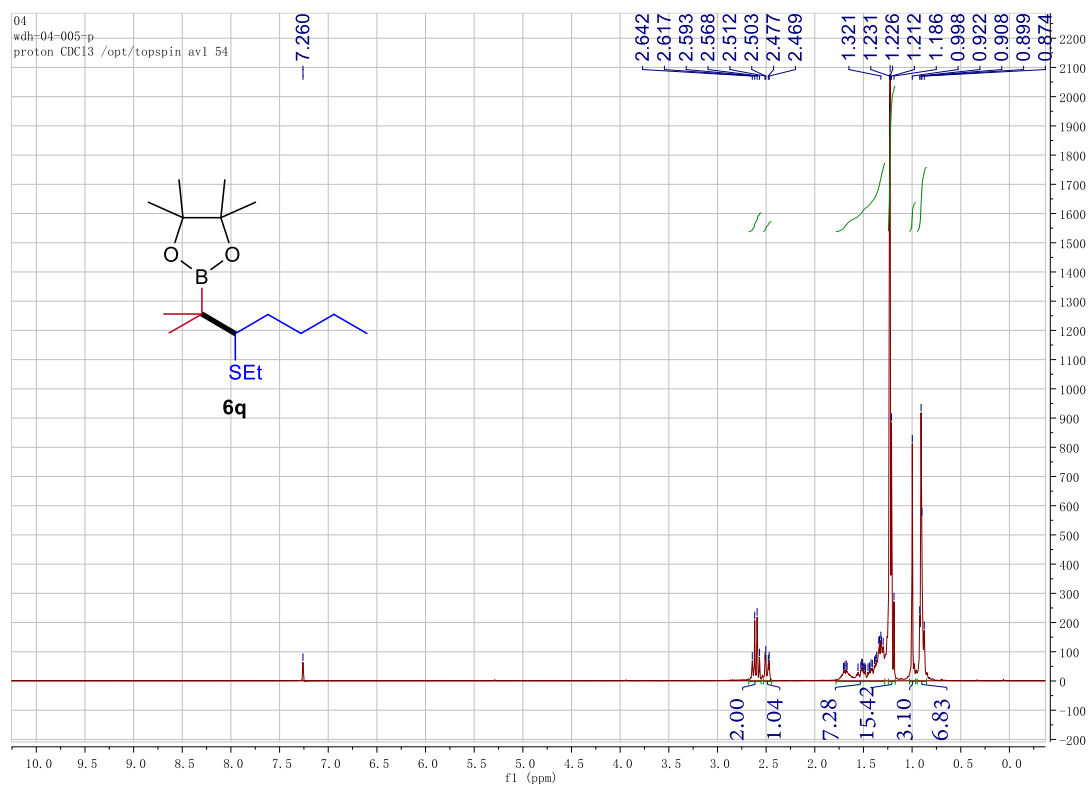

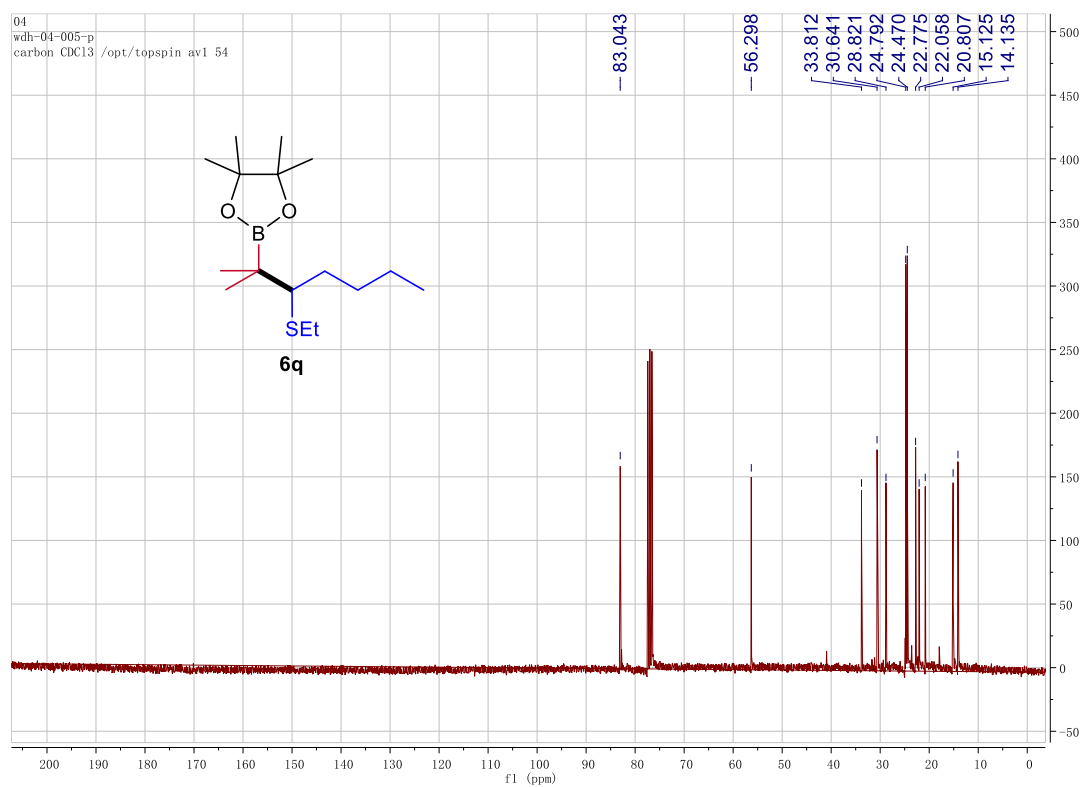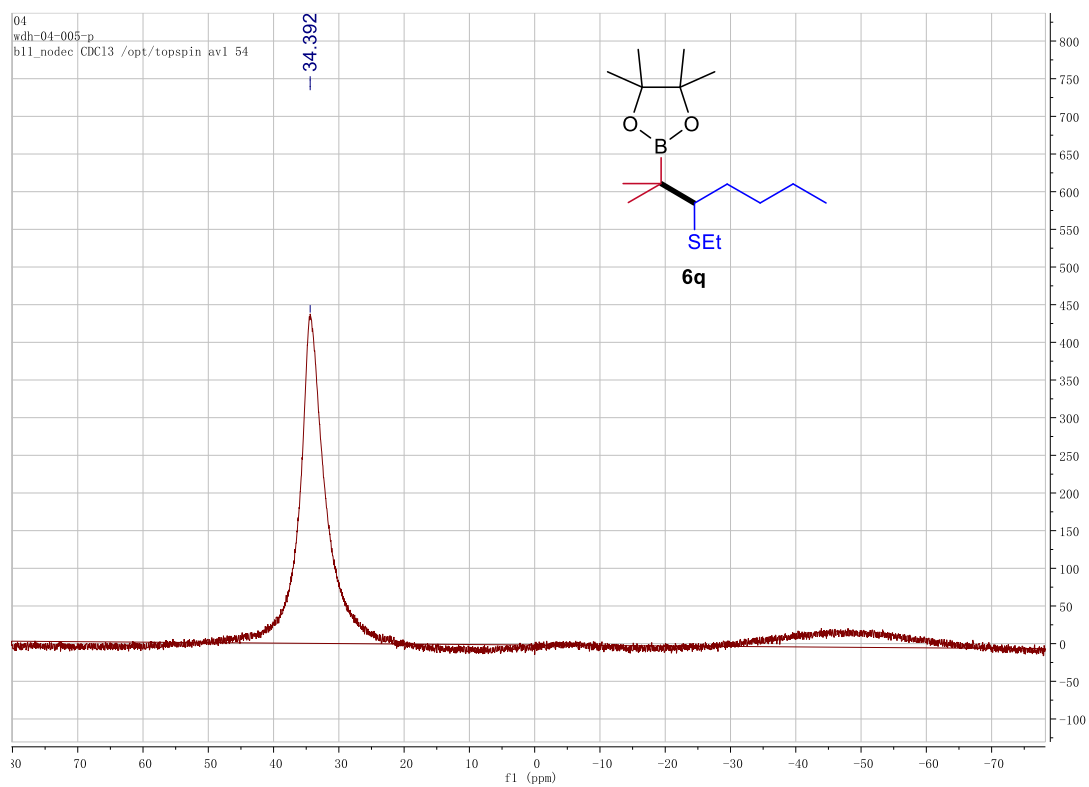

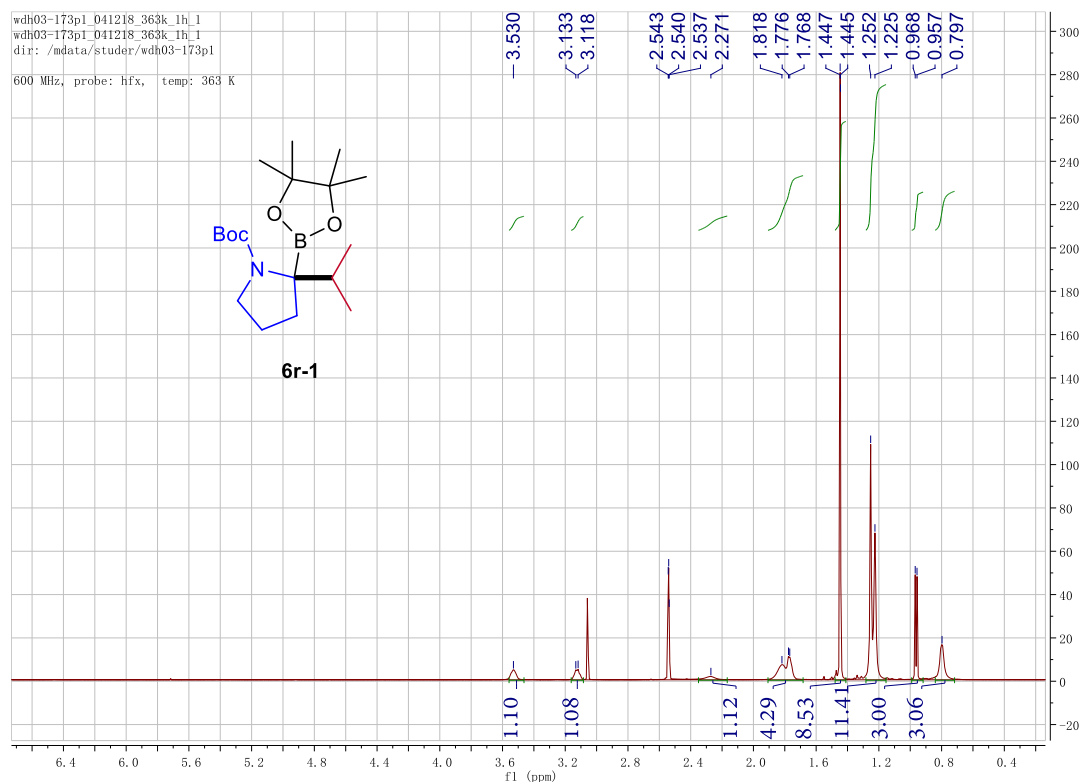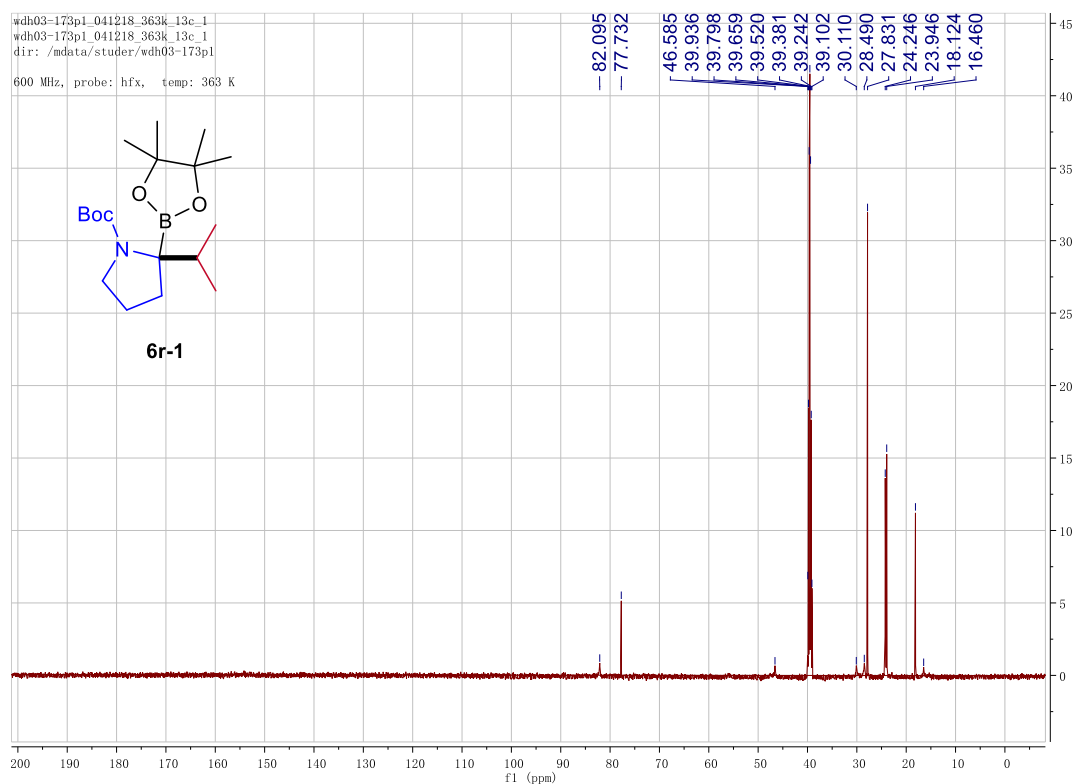

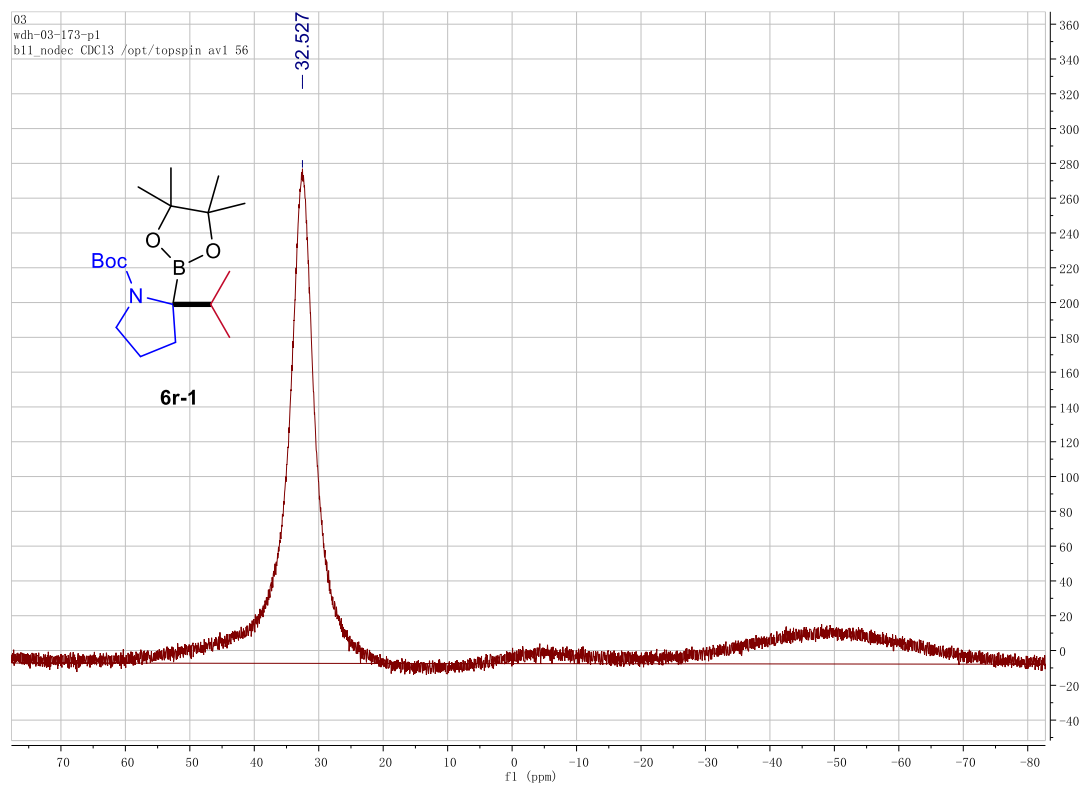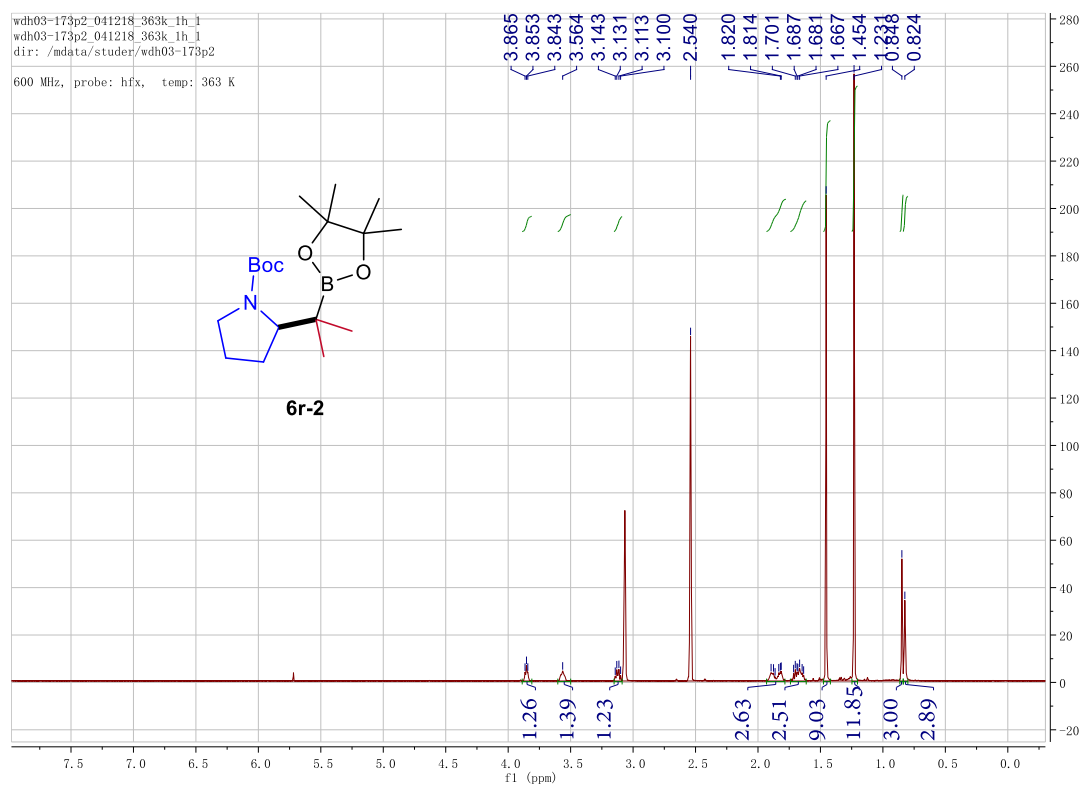



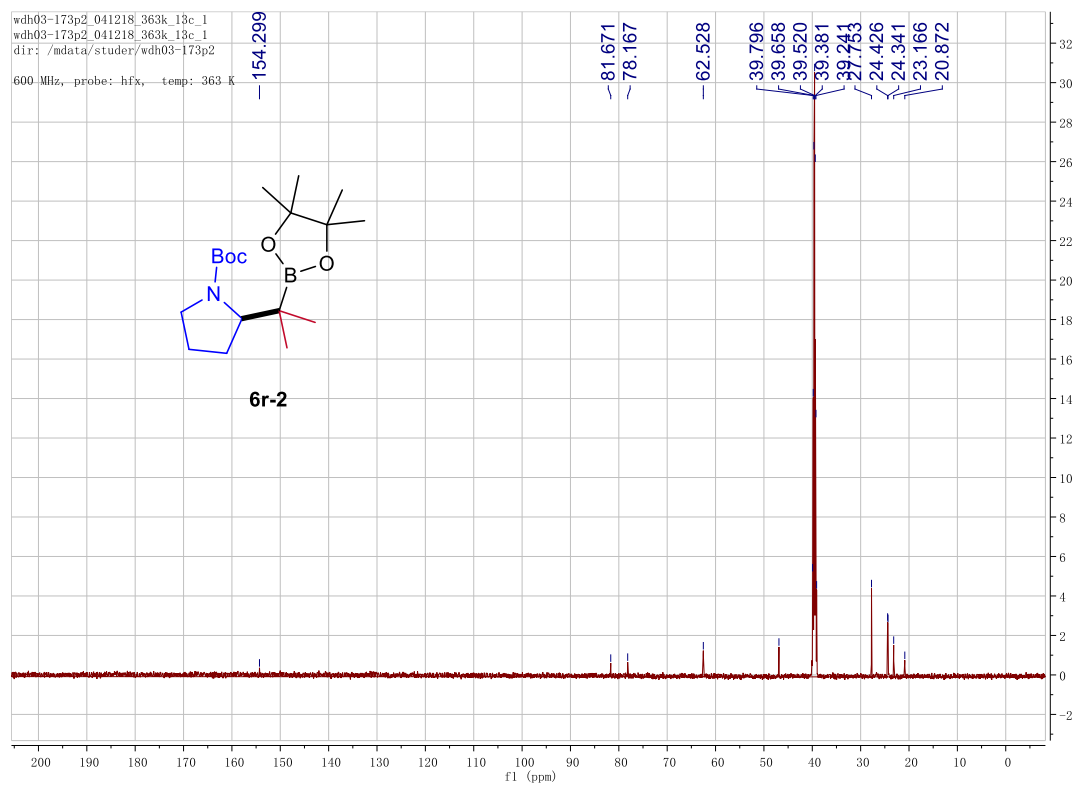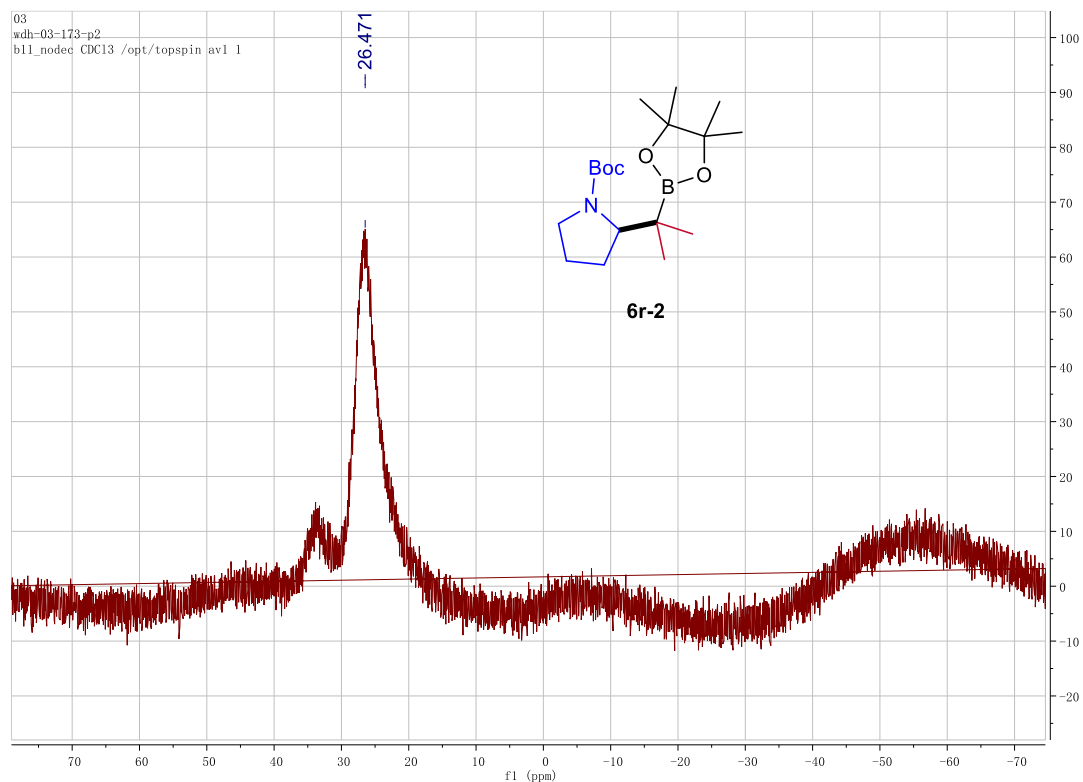

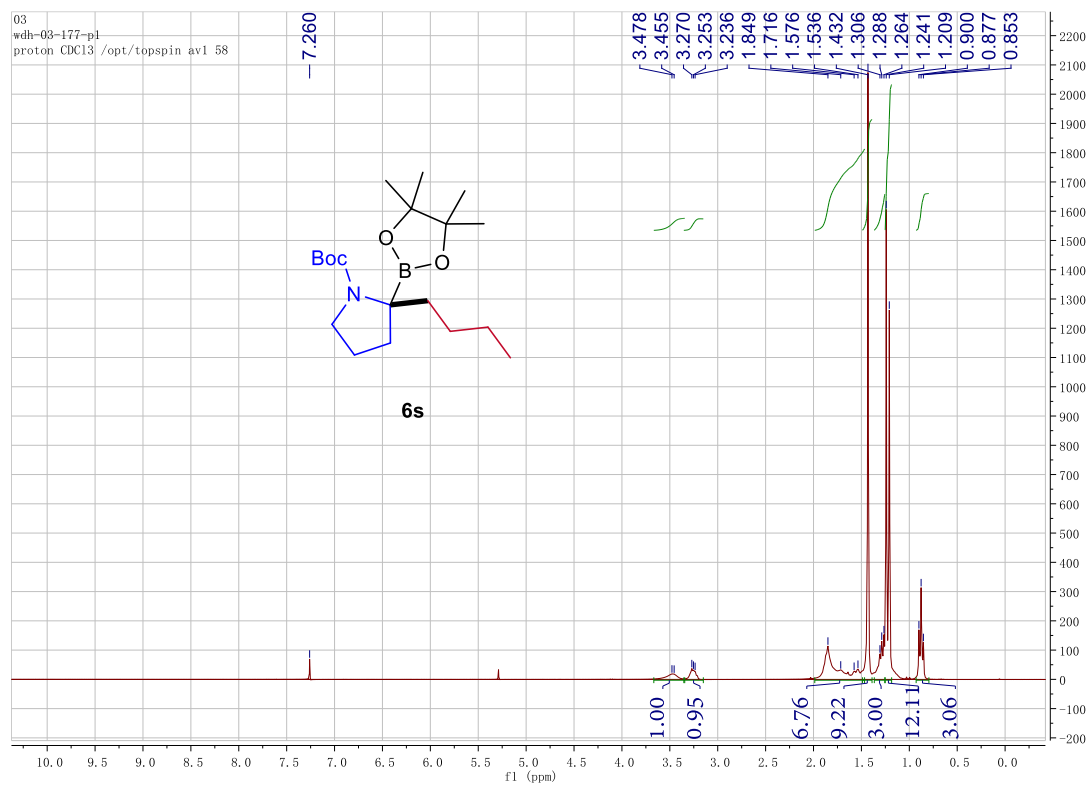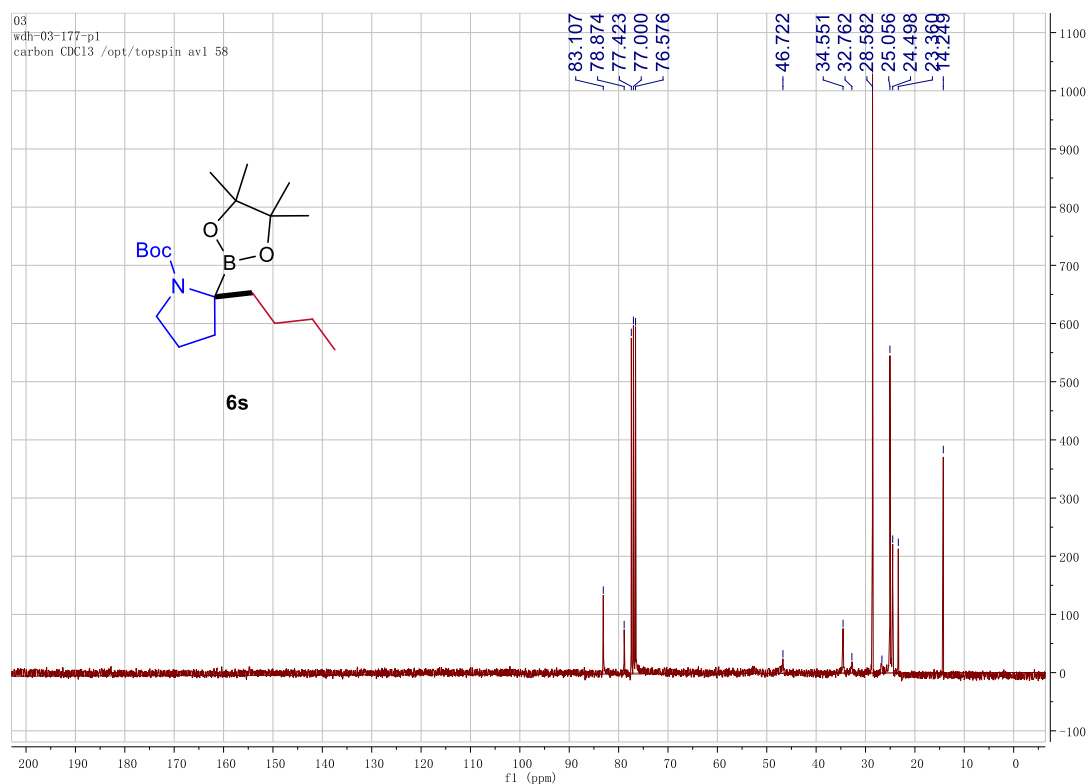

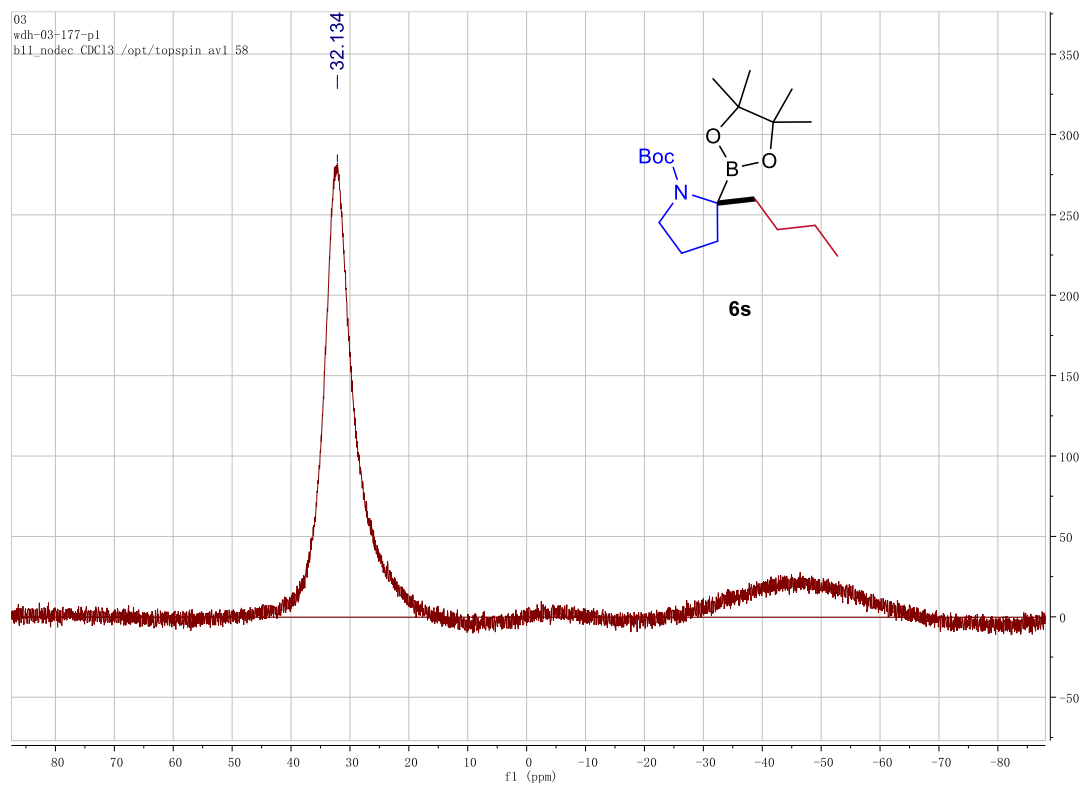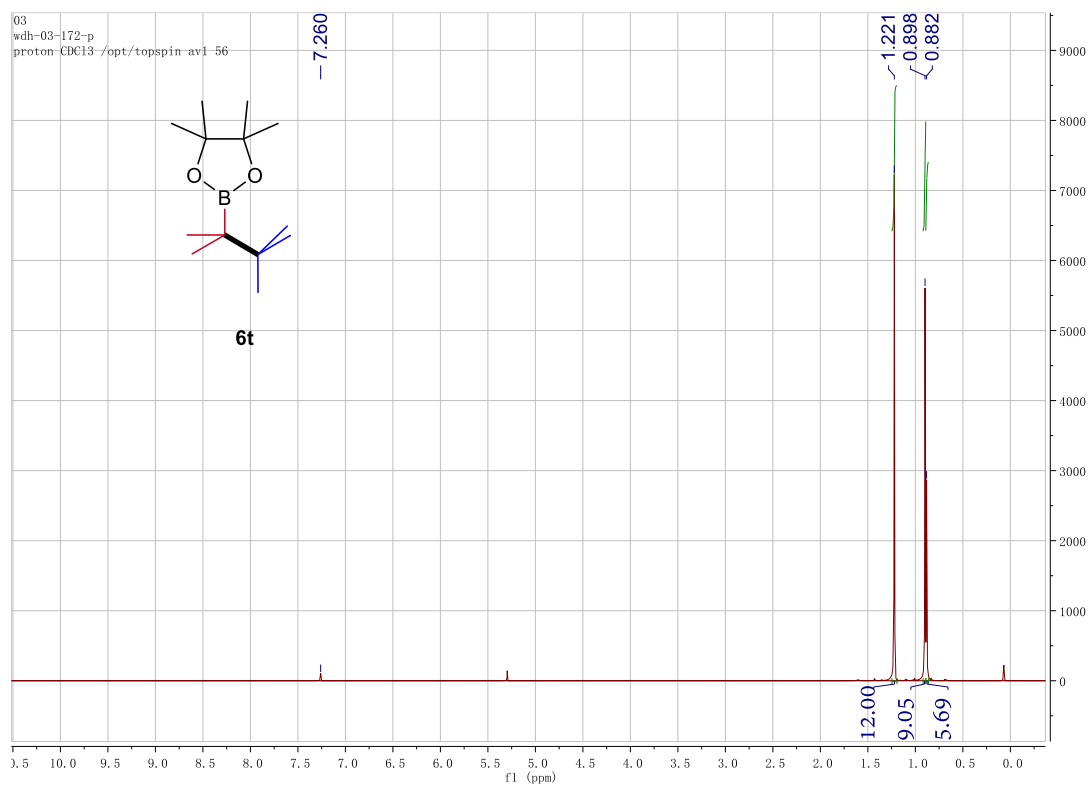

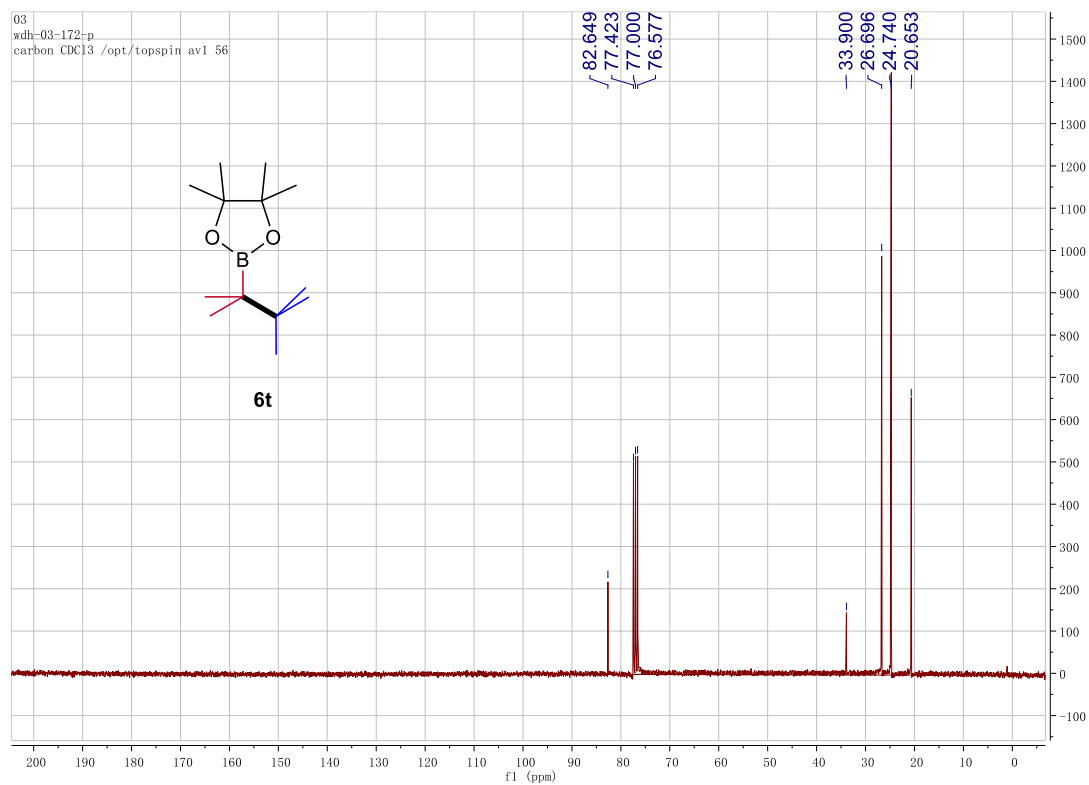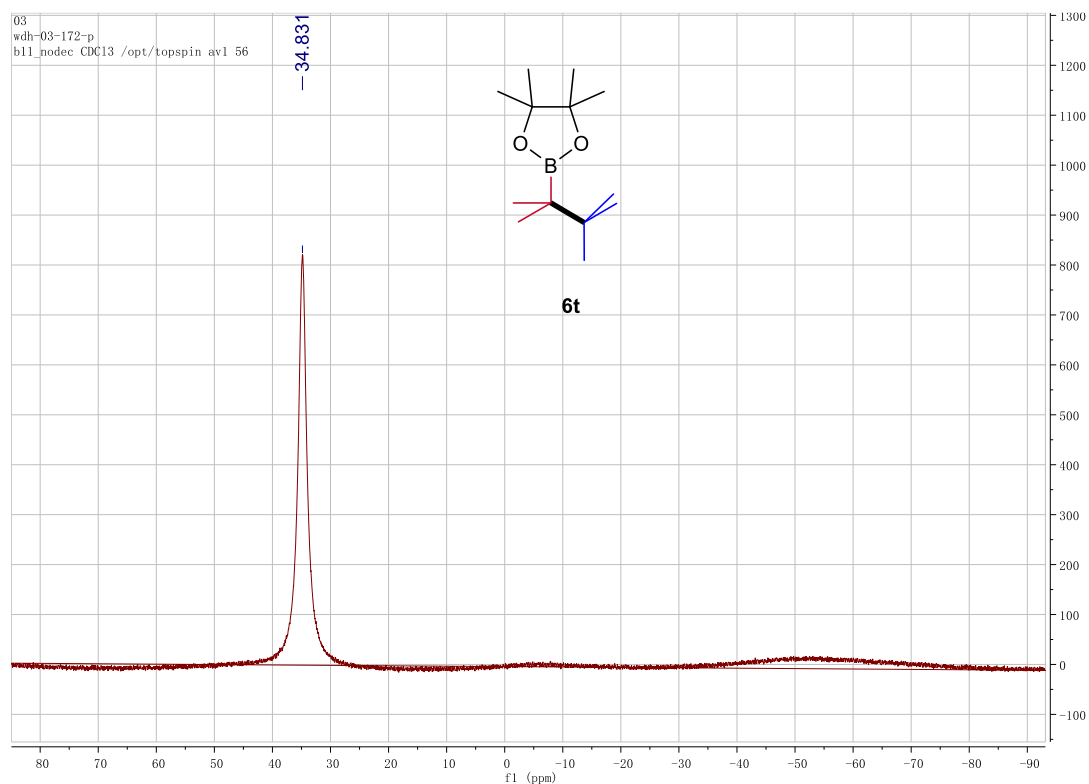

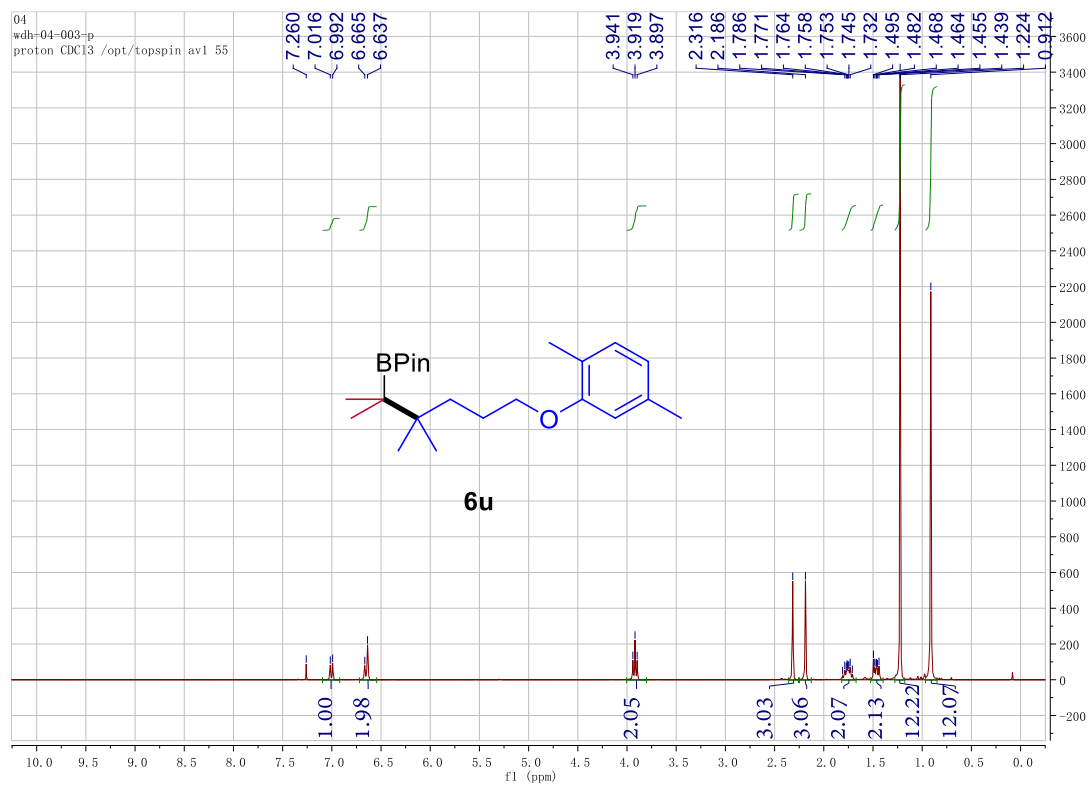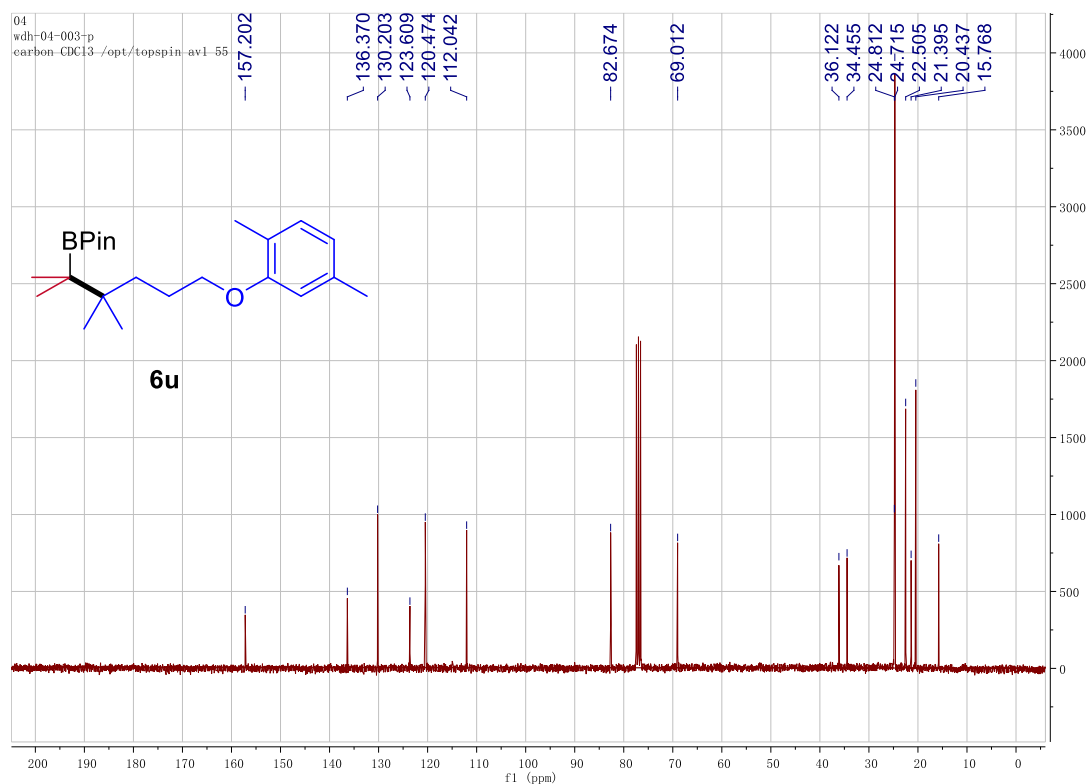

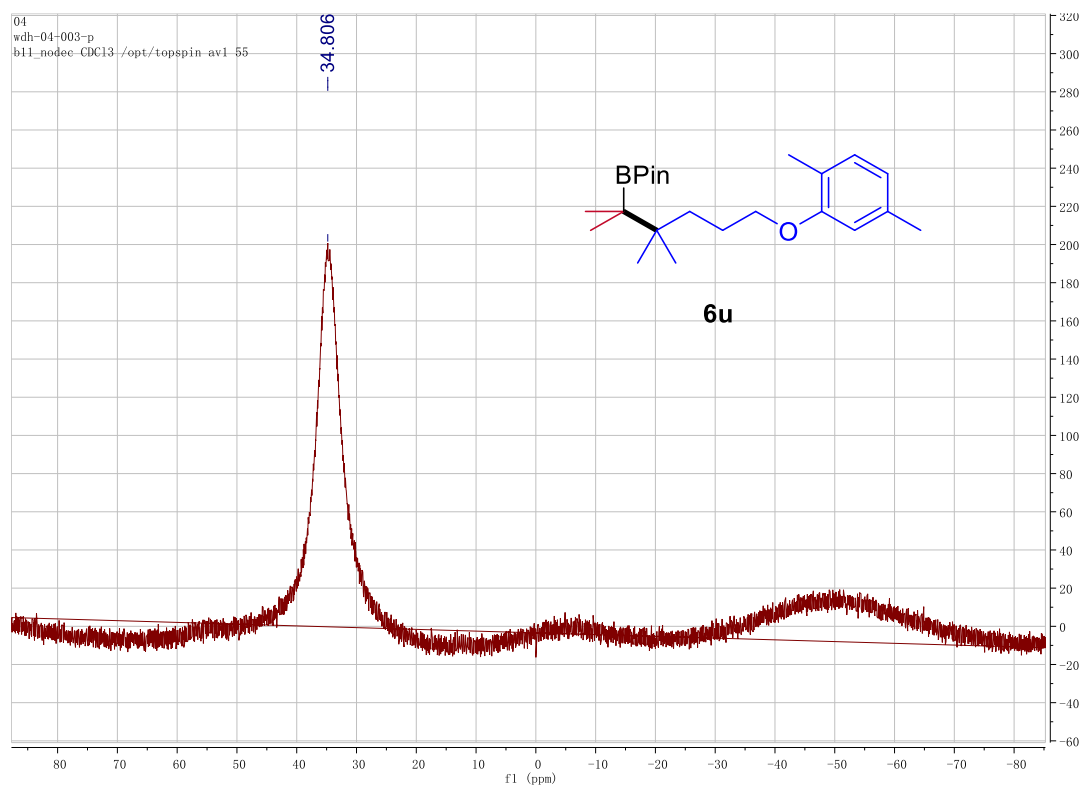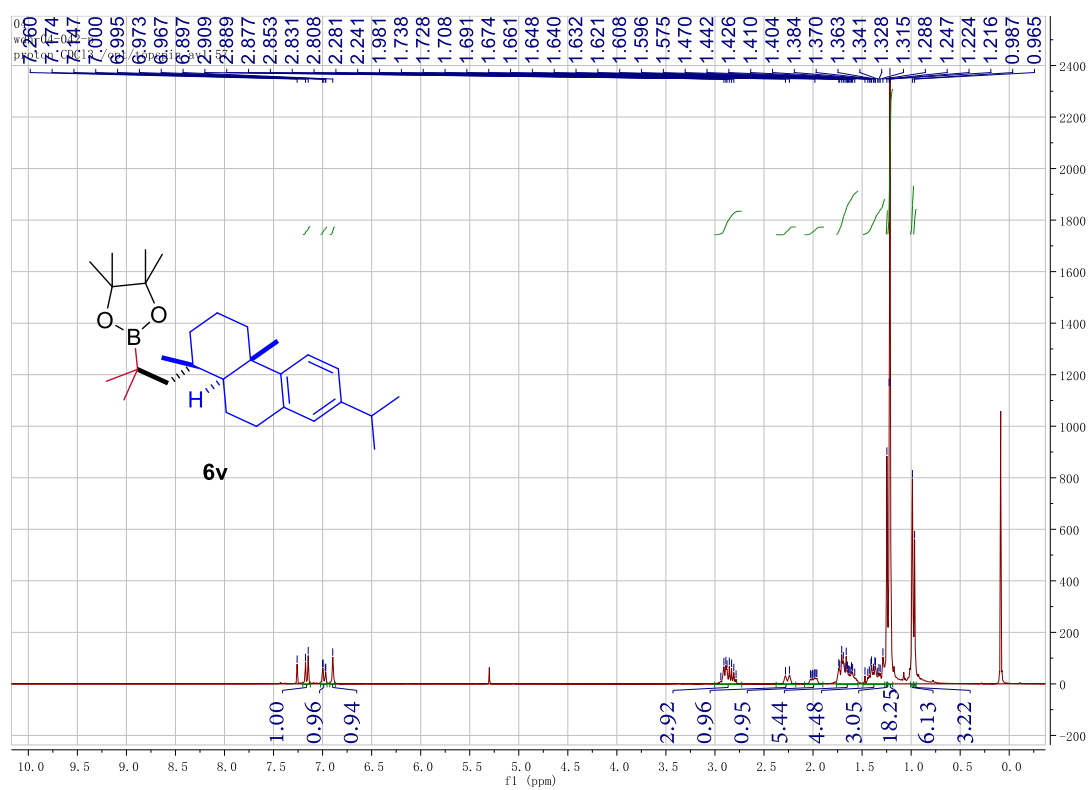

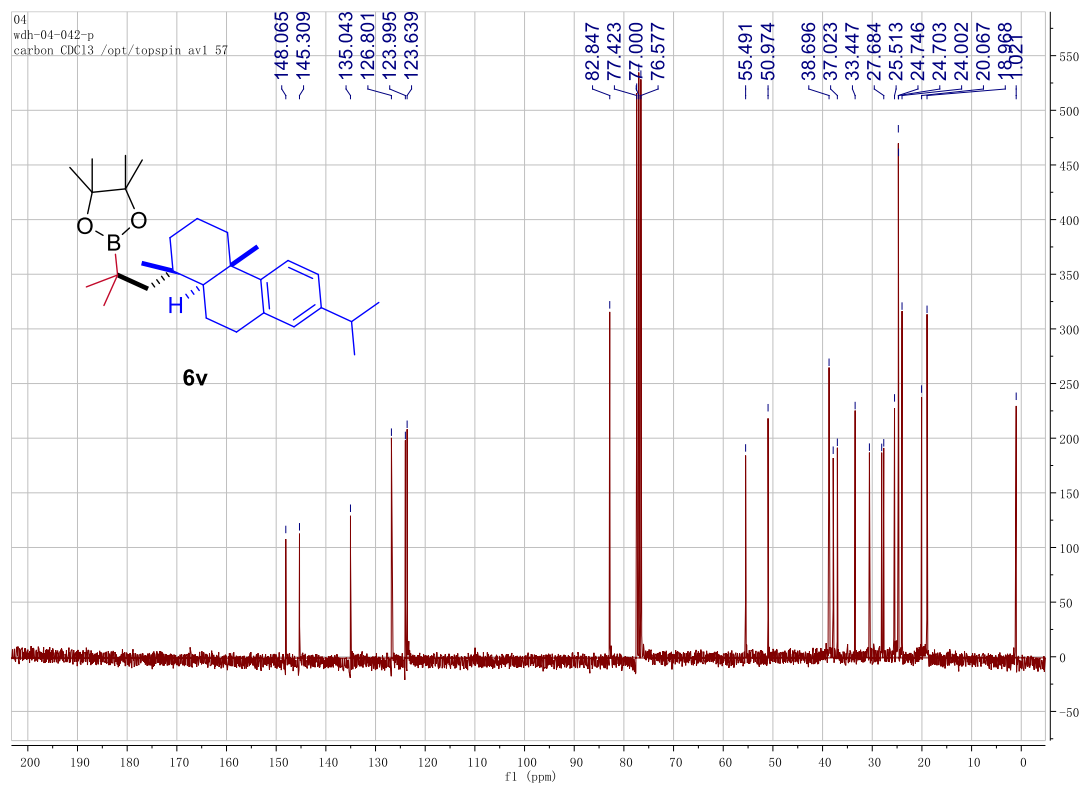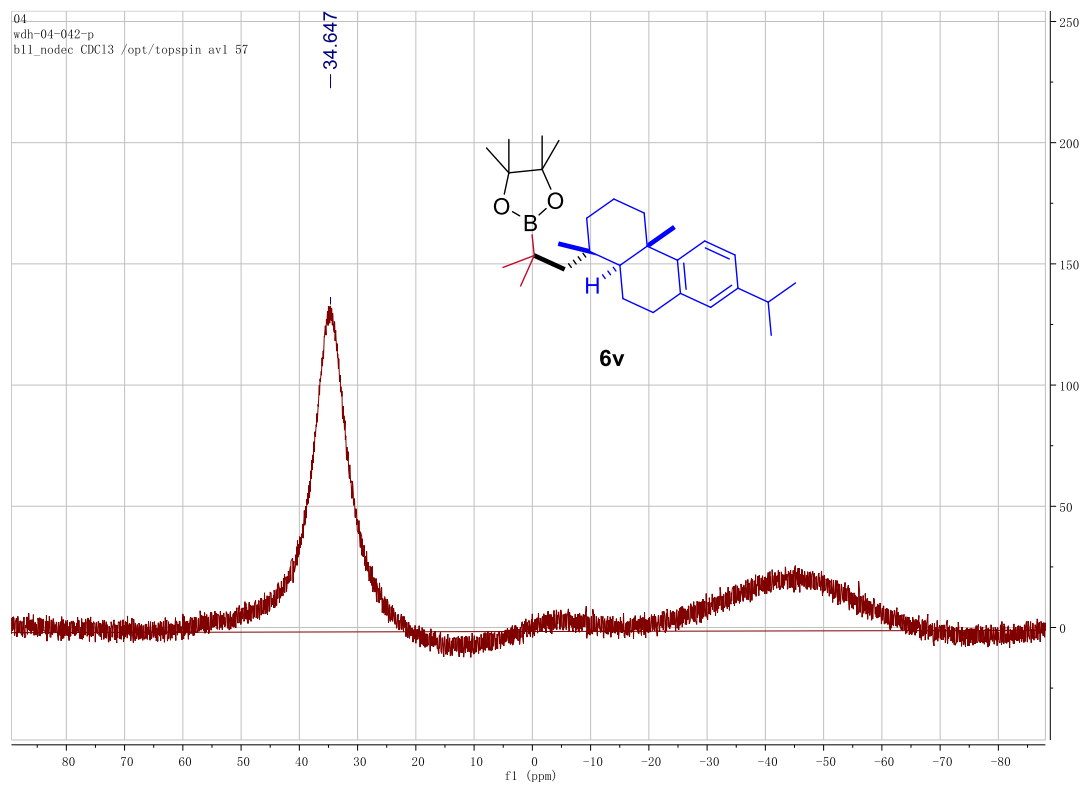

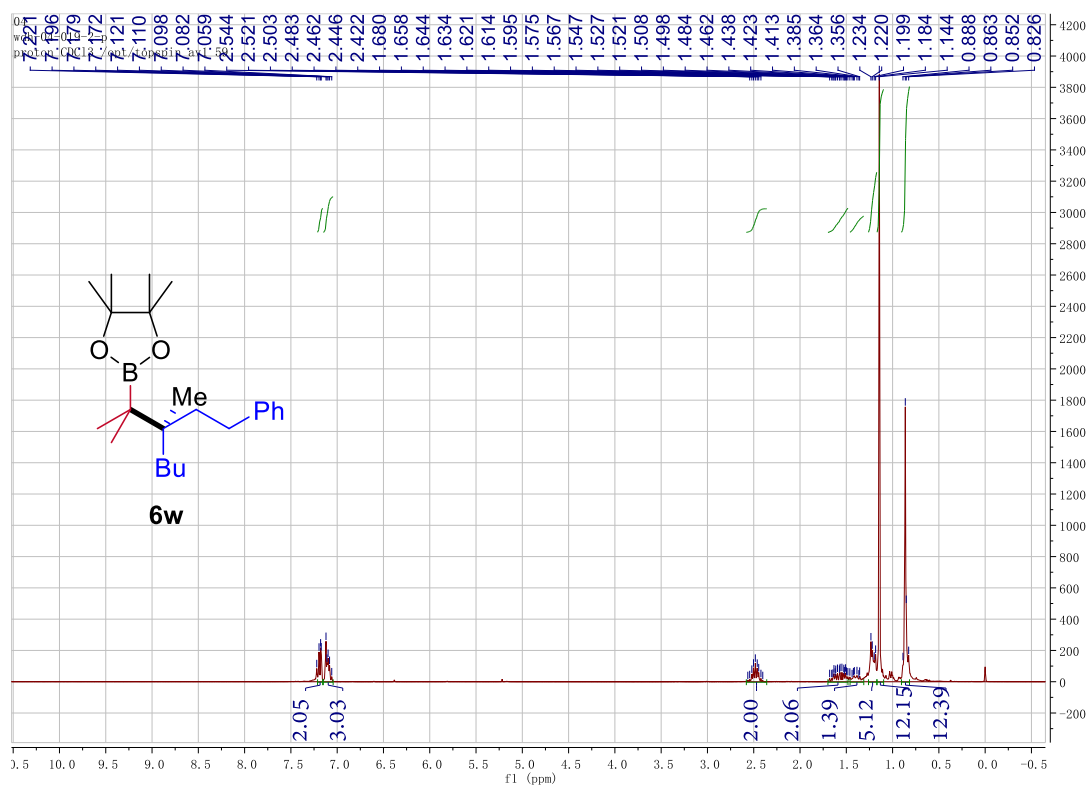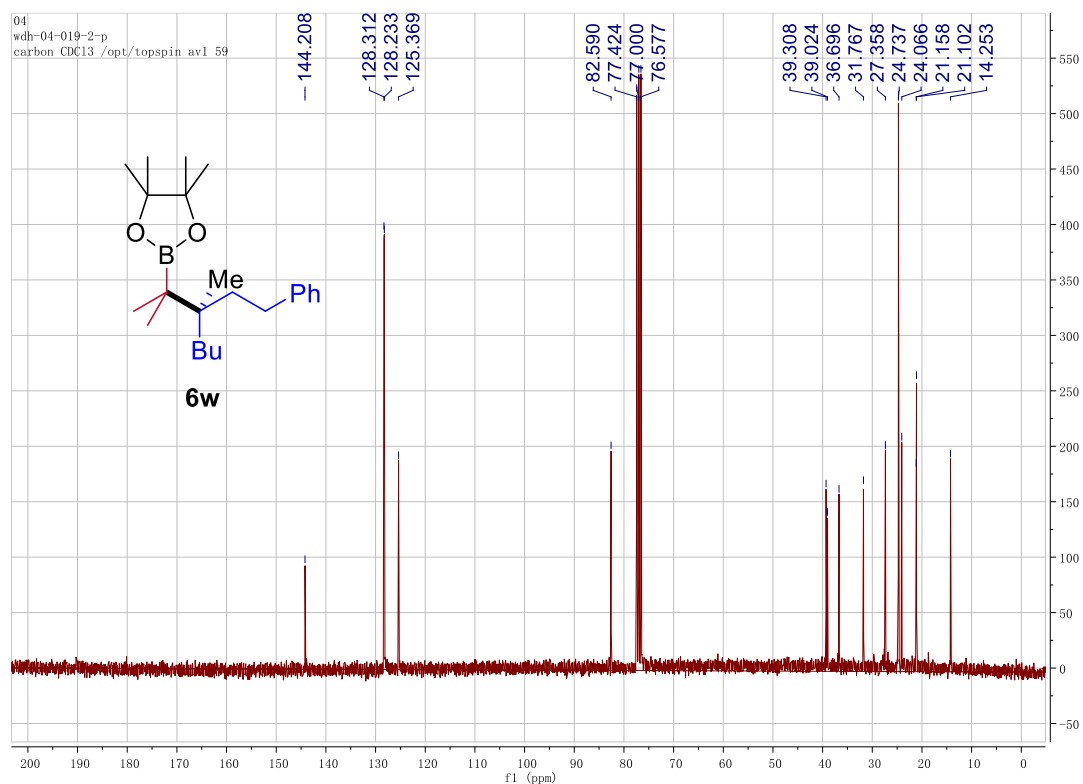



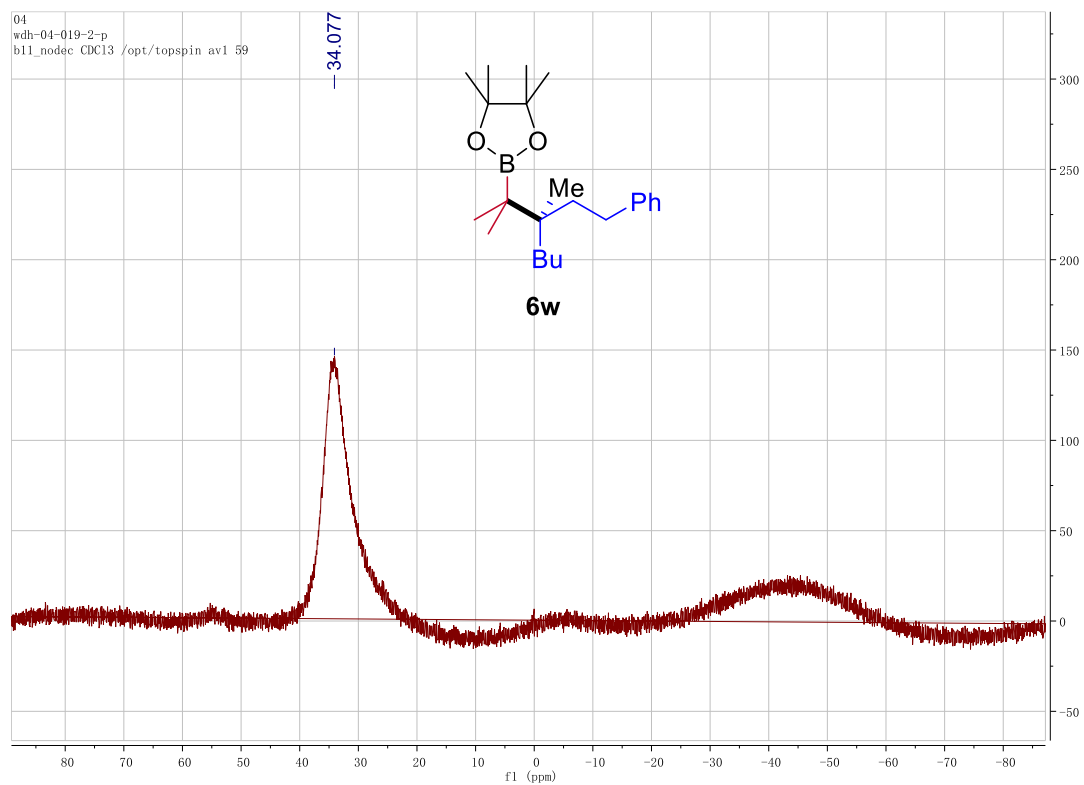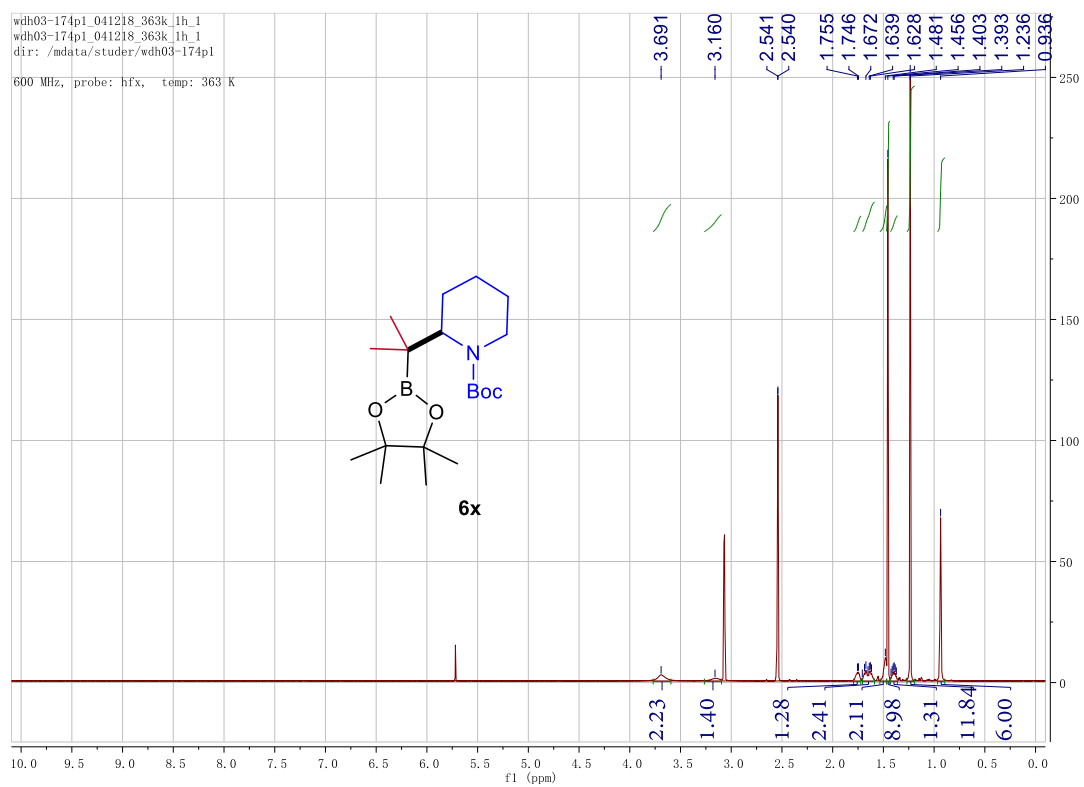

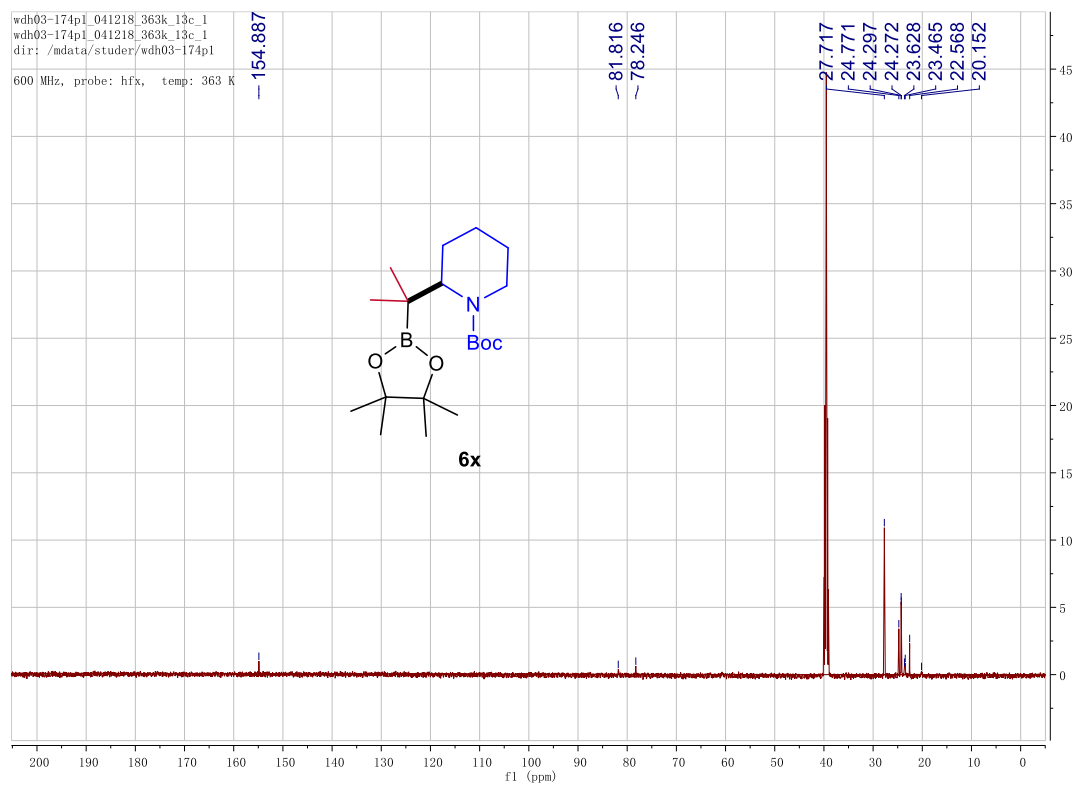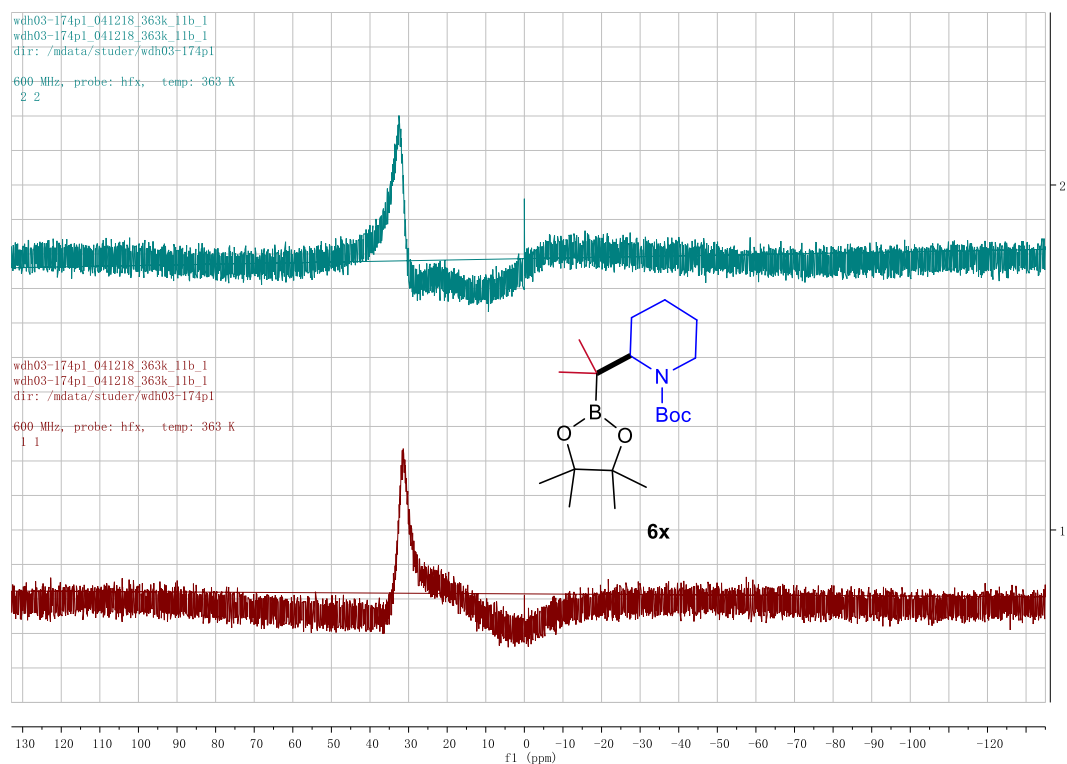

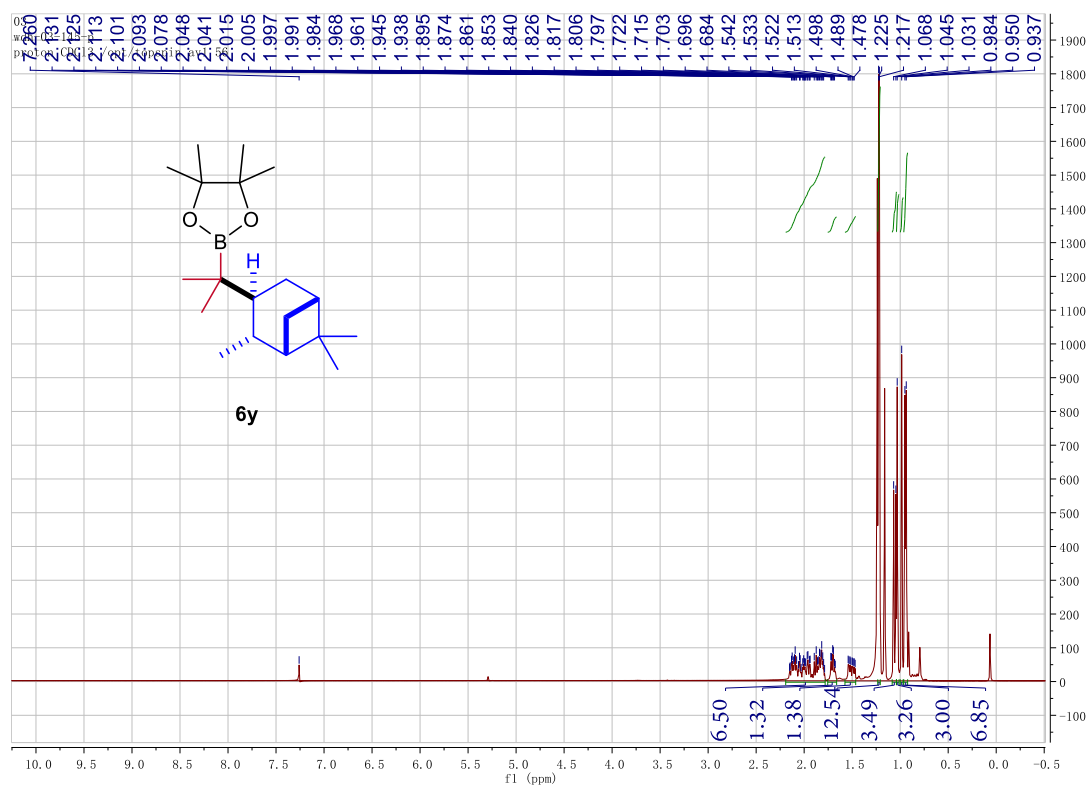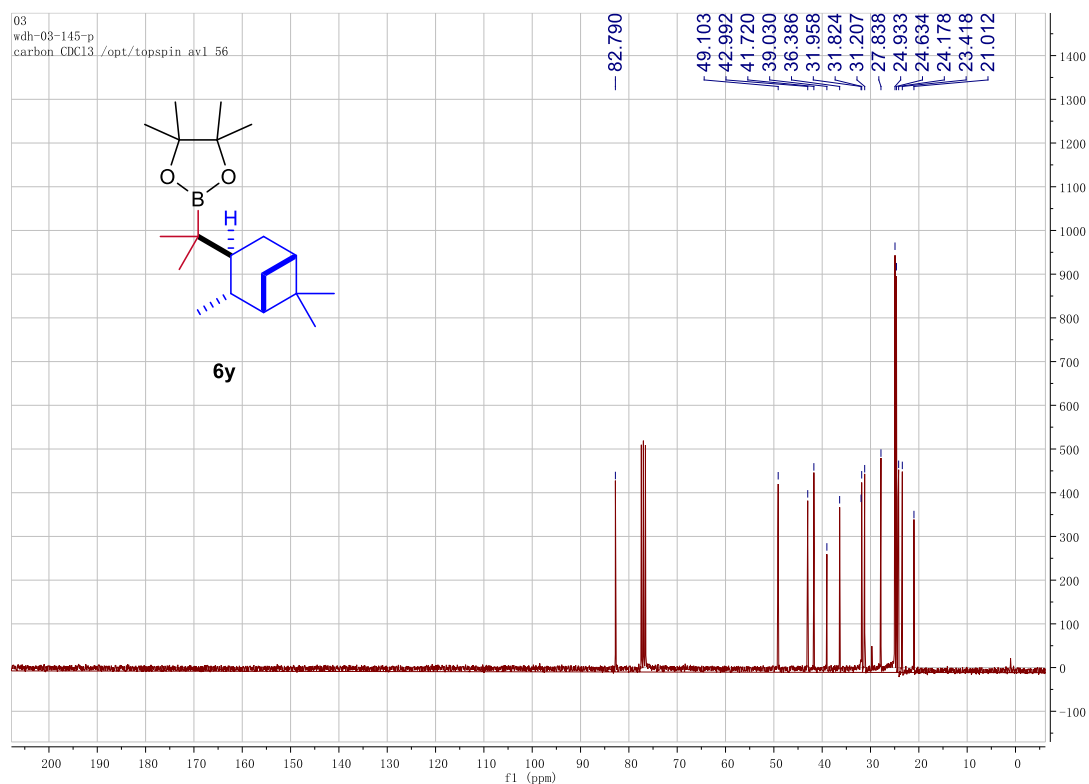

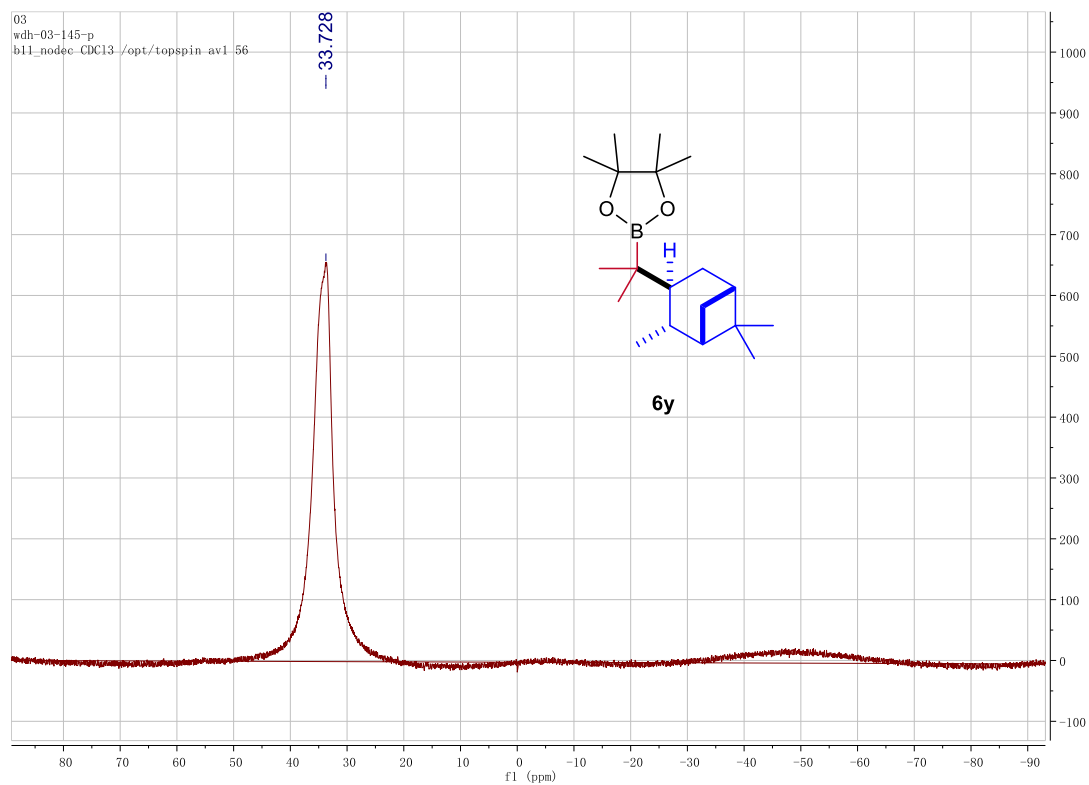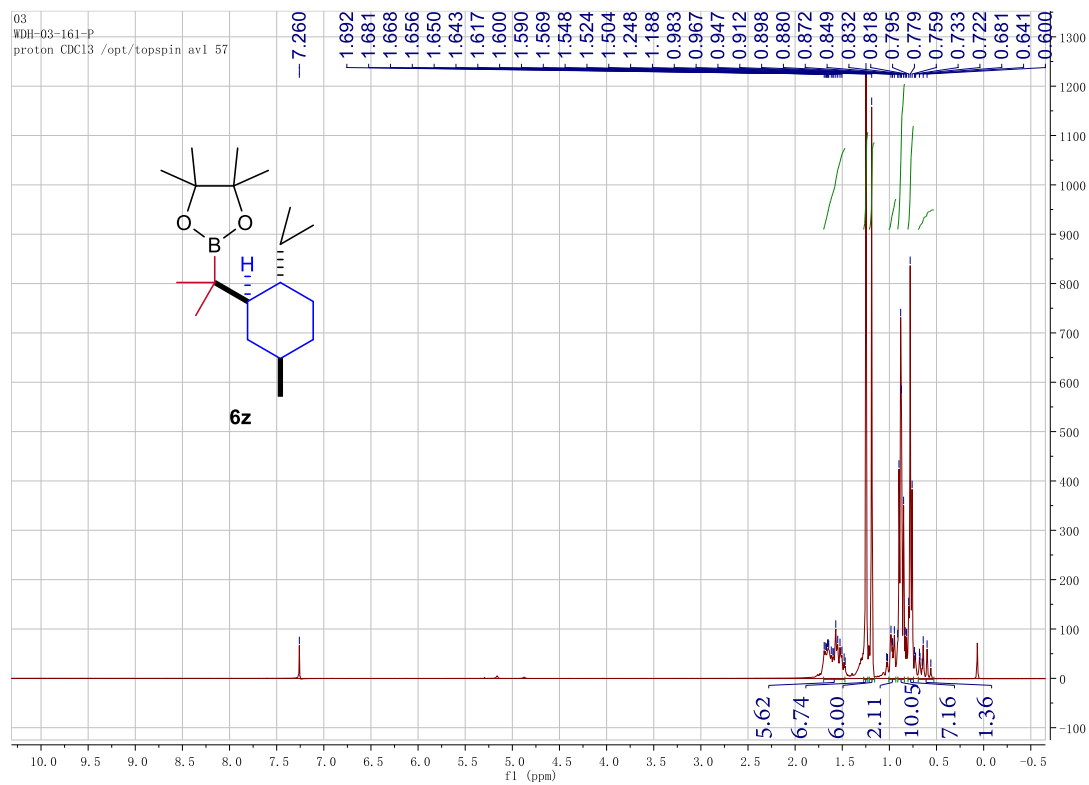

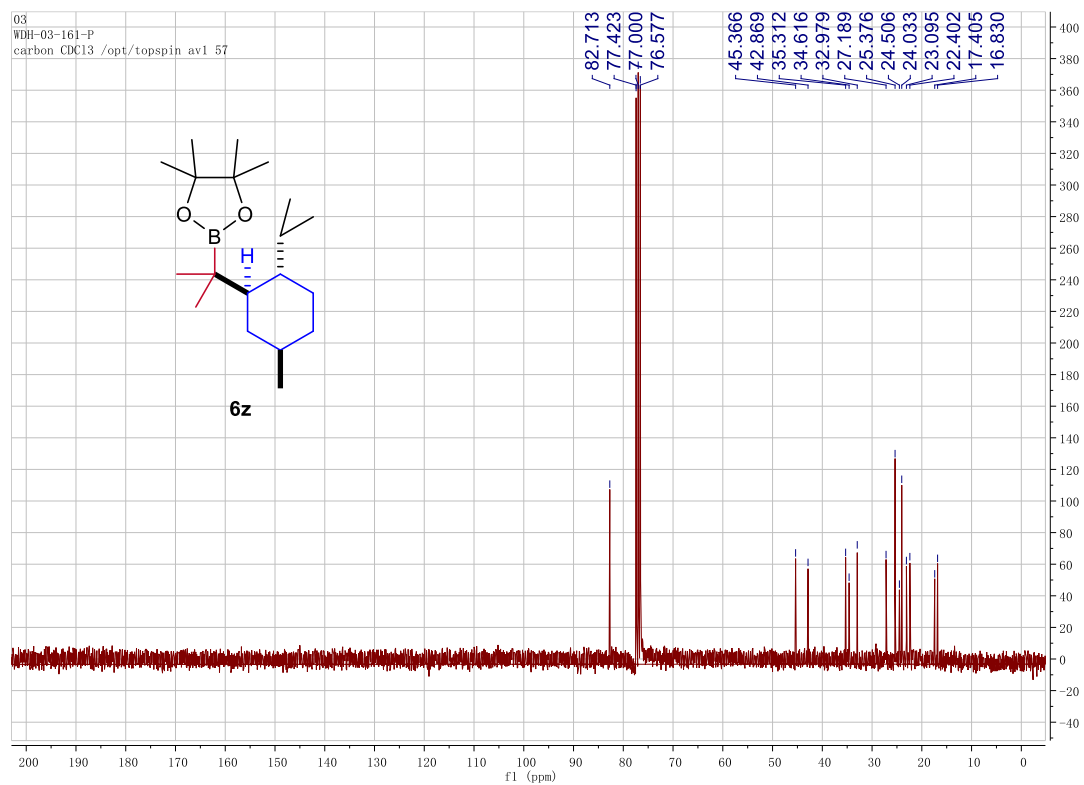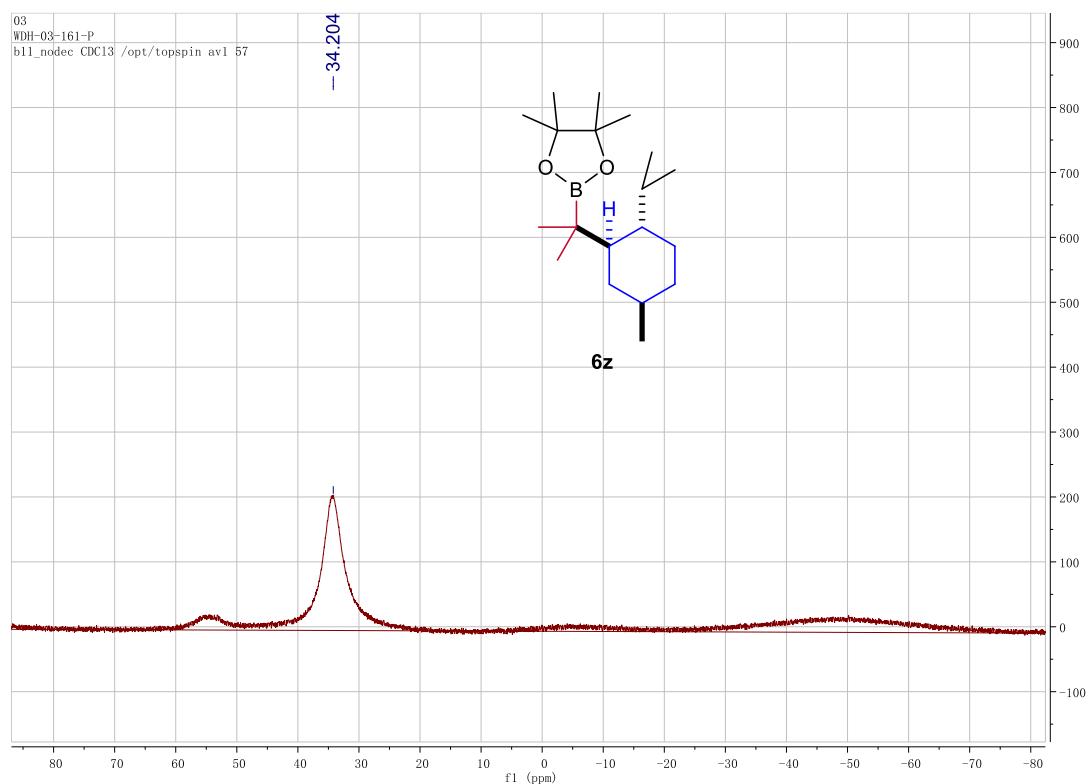

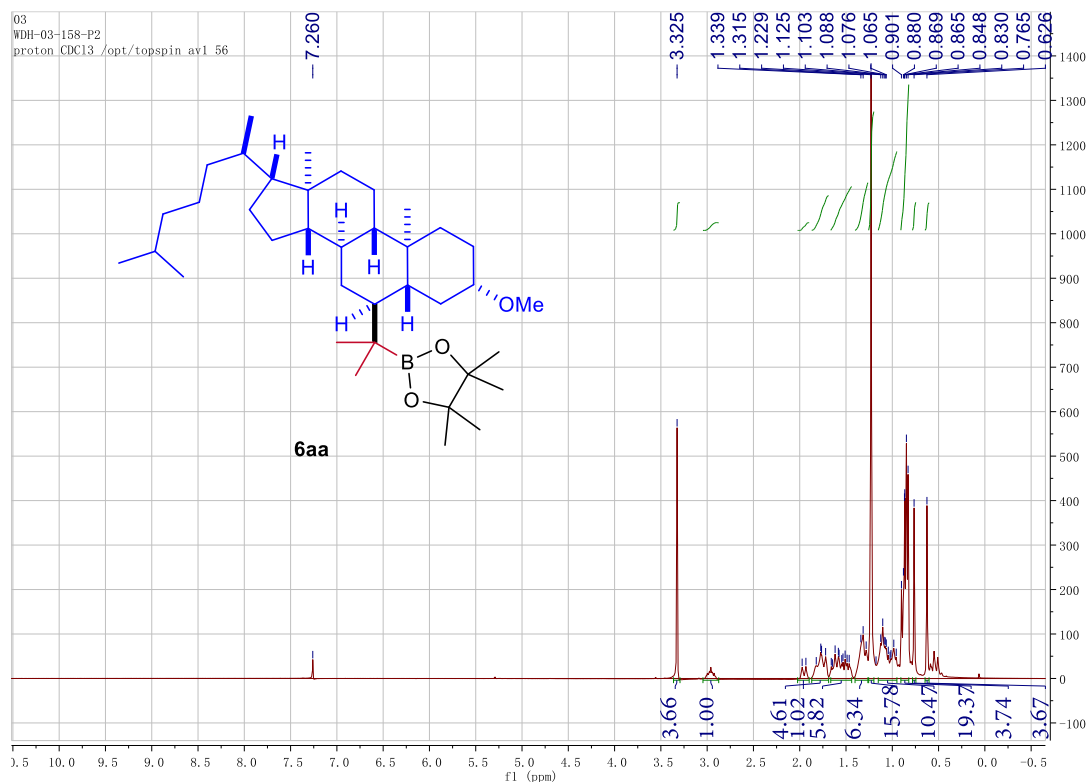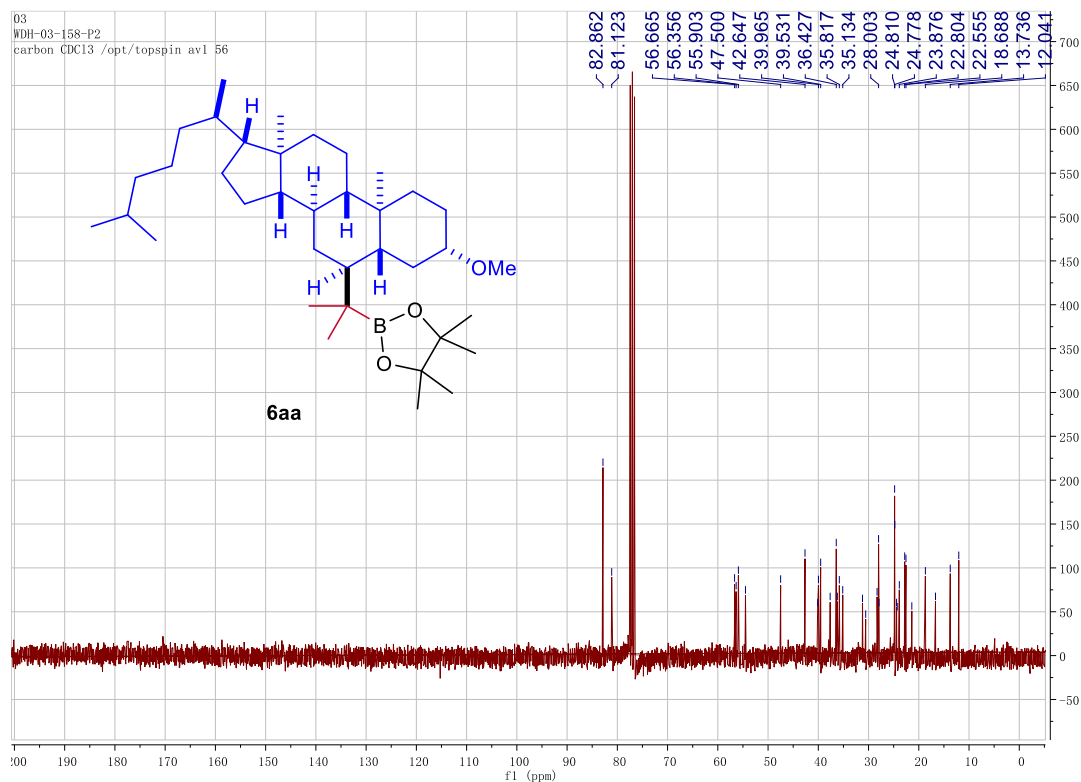

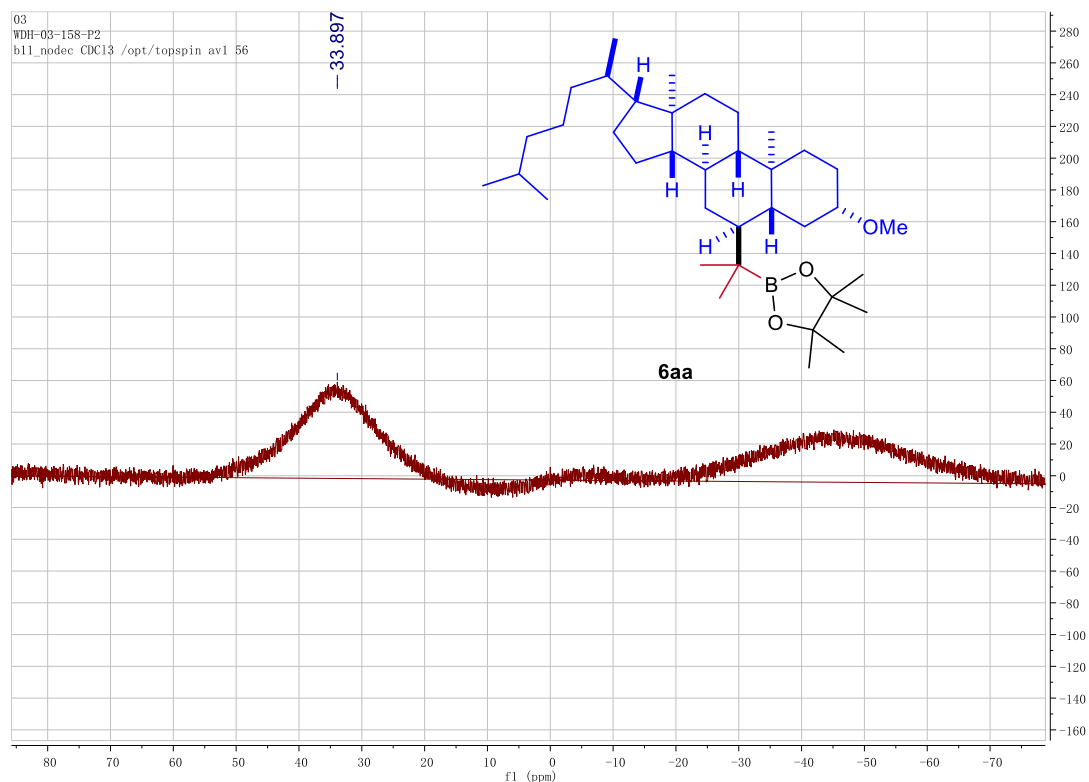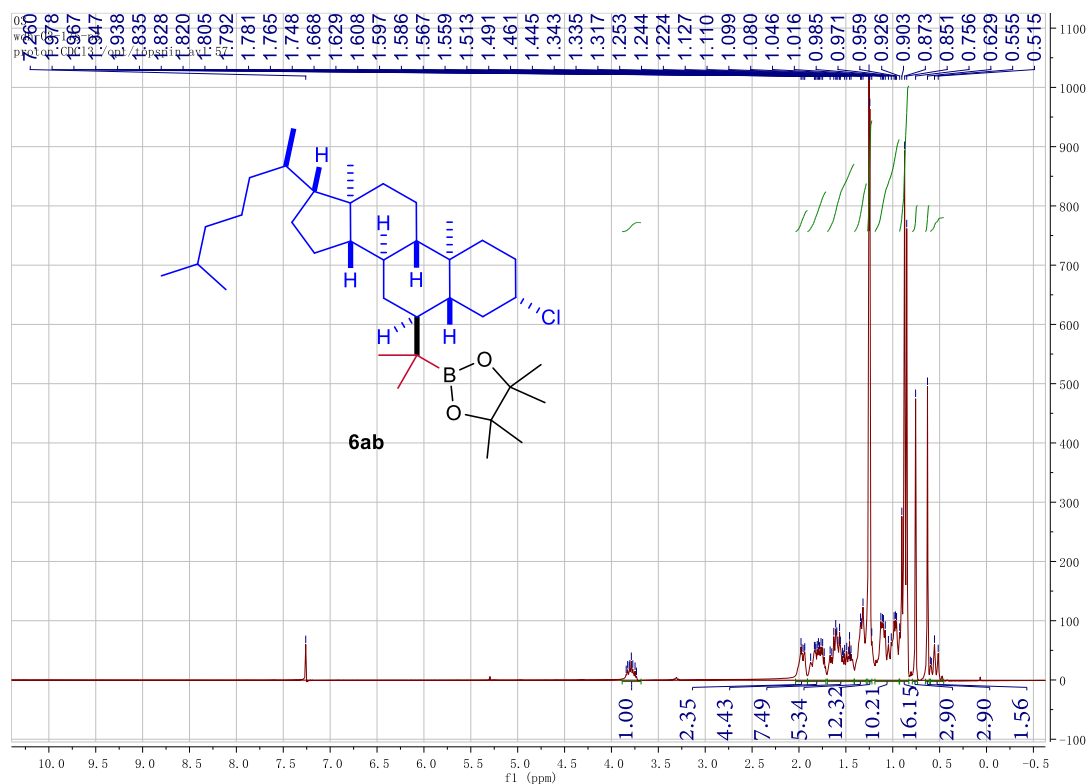

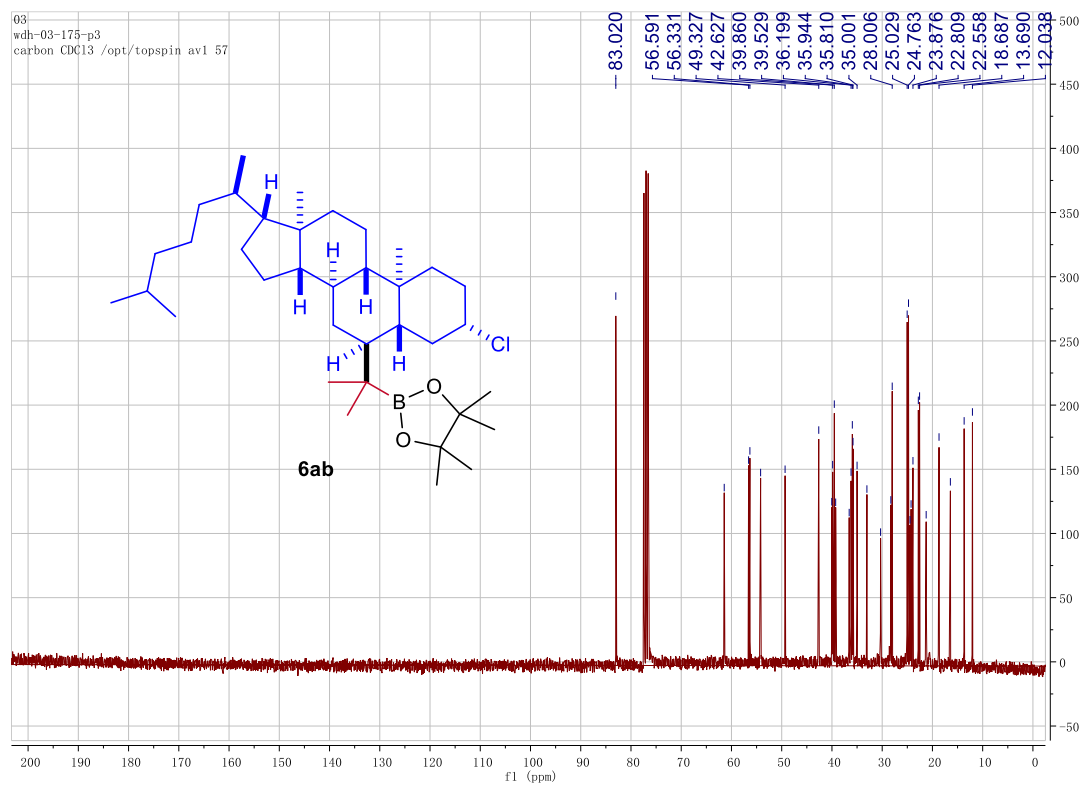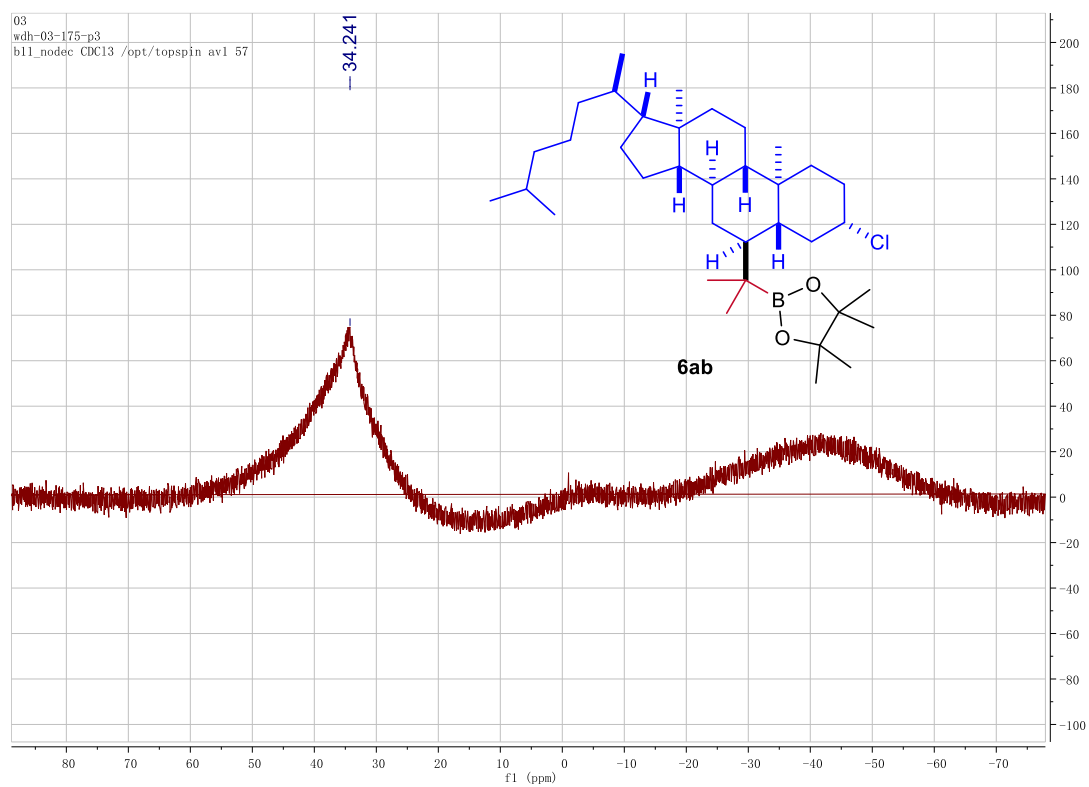

Supplement: Supplementary file 1 [file 17466146]
